# Supplementary material
Source: Research Square preprint supplement (doi:10.21203/rs.3.rs-9129034/v1)

Figure 1B

CTx d0

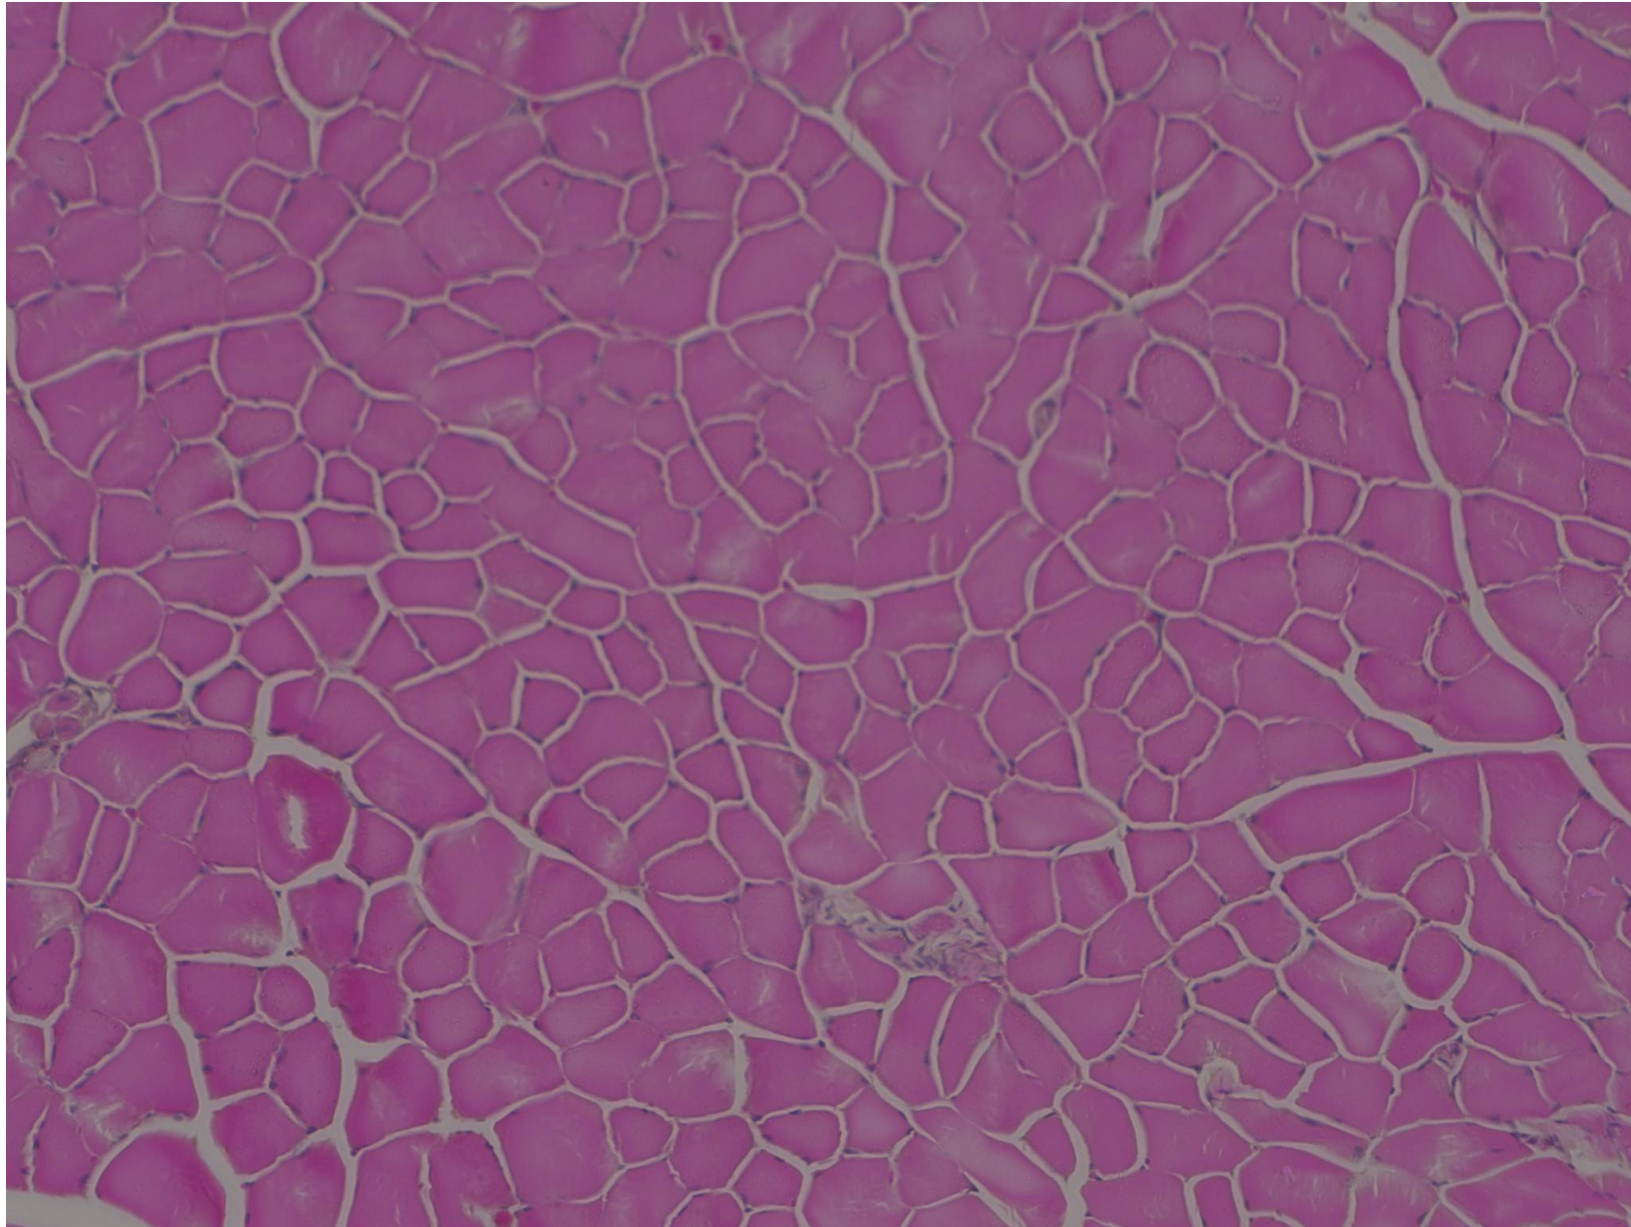

Figure 1B

CTx d3

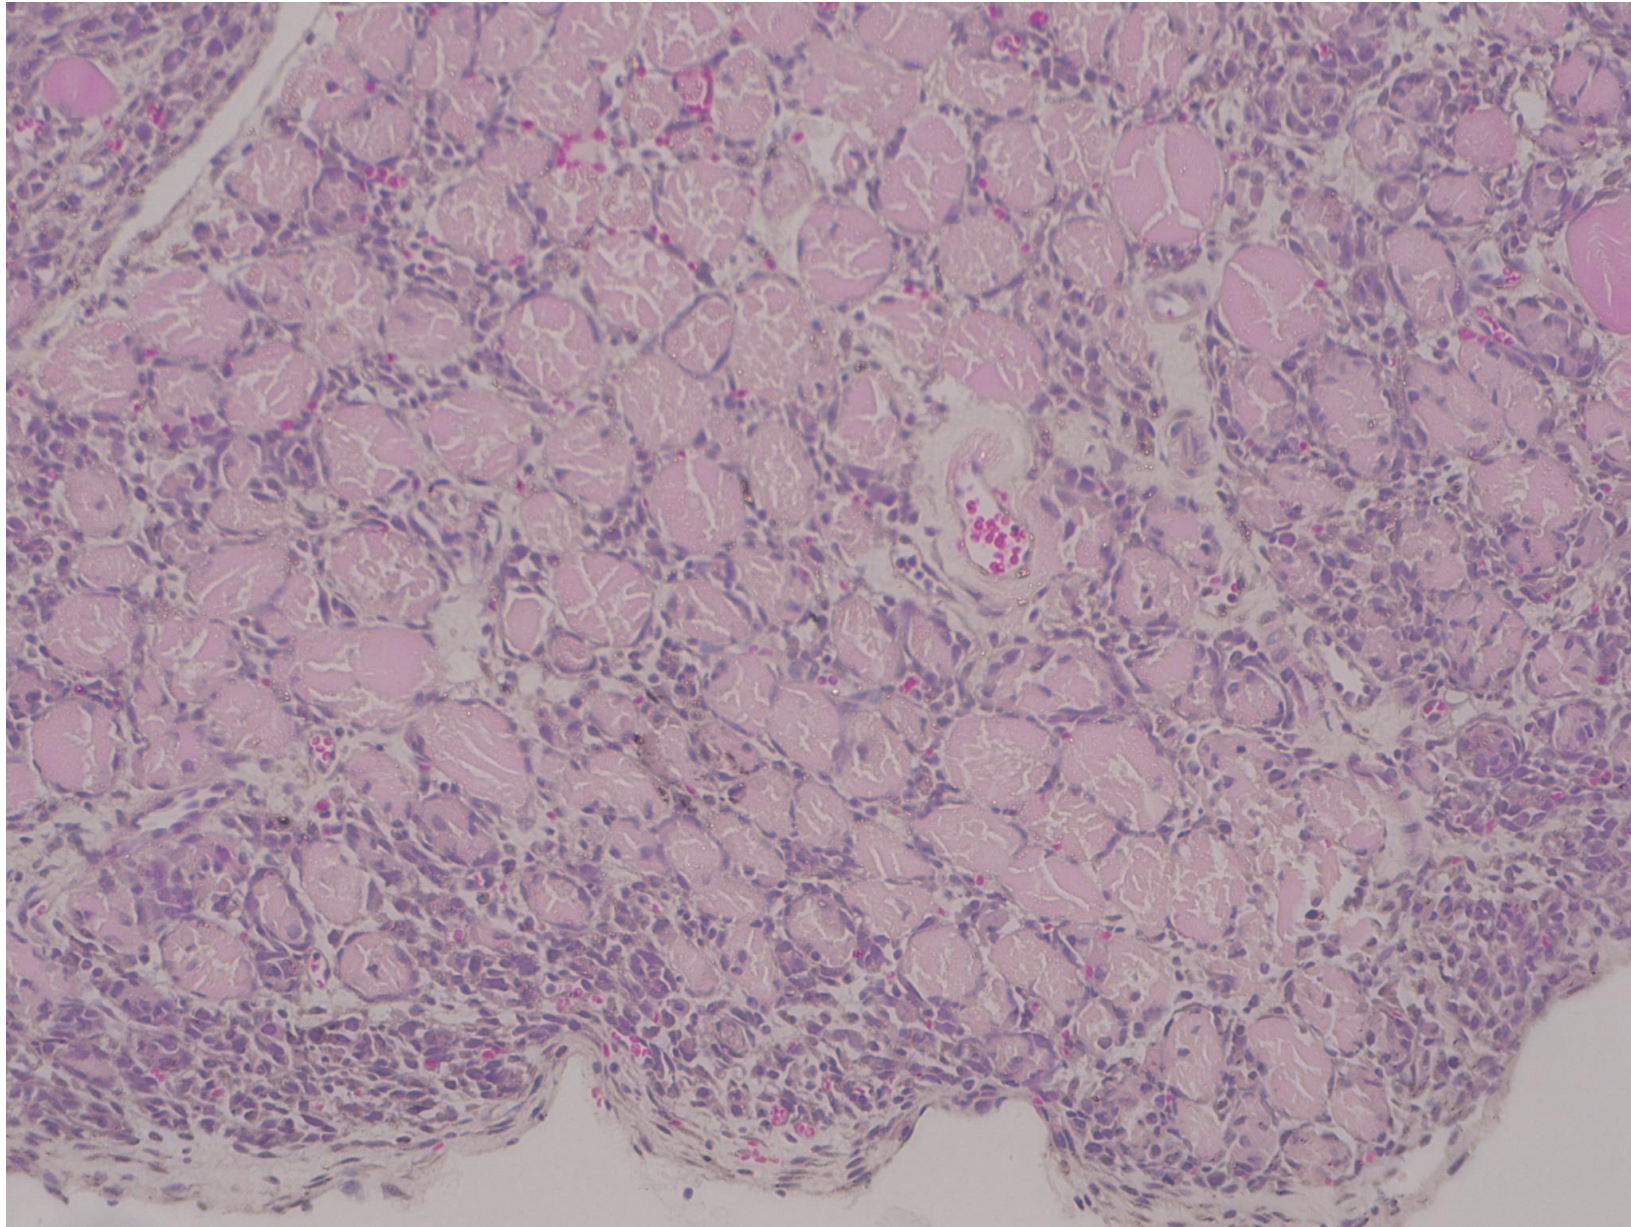

Figure 1B

CTx d5

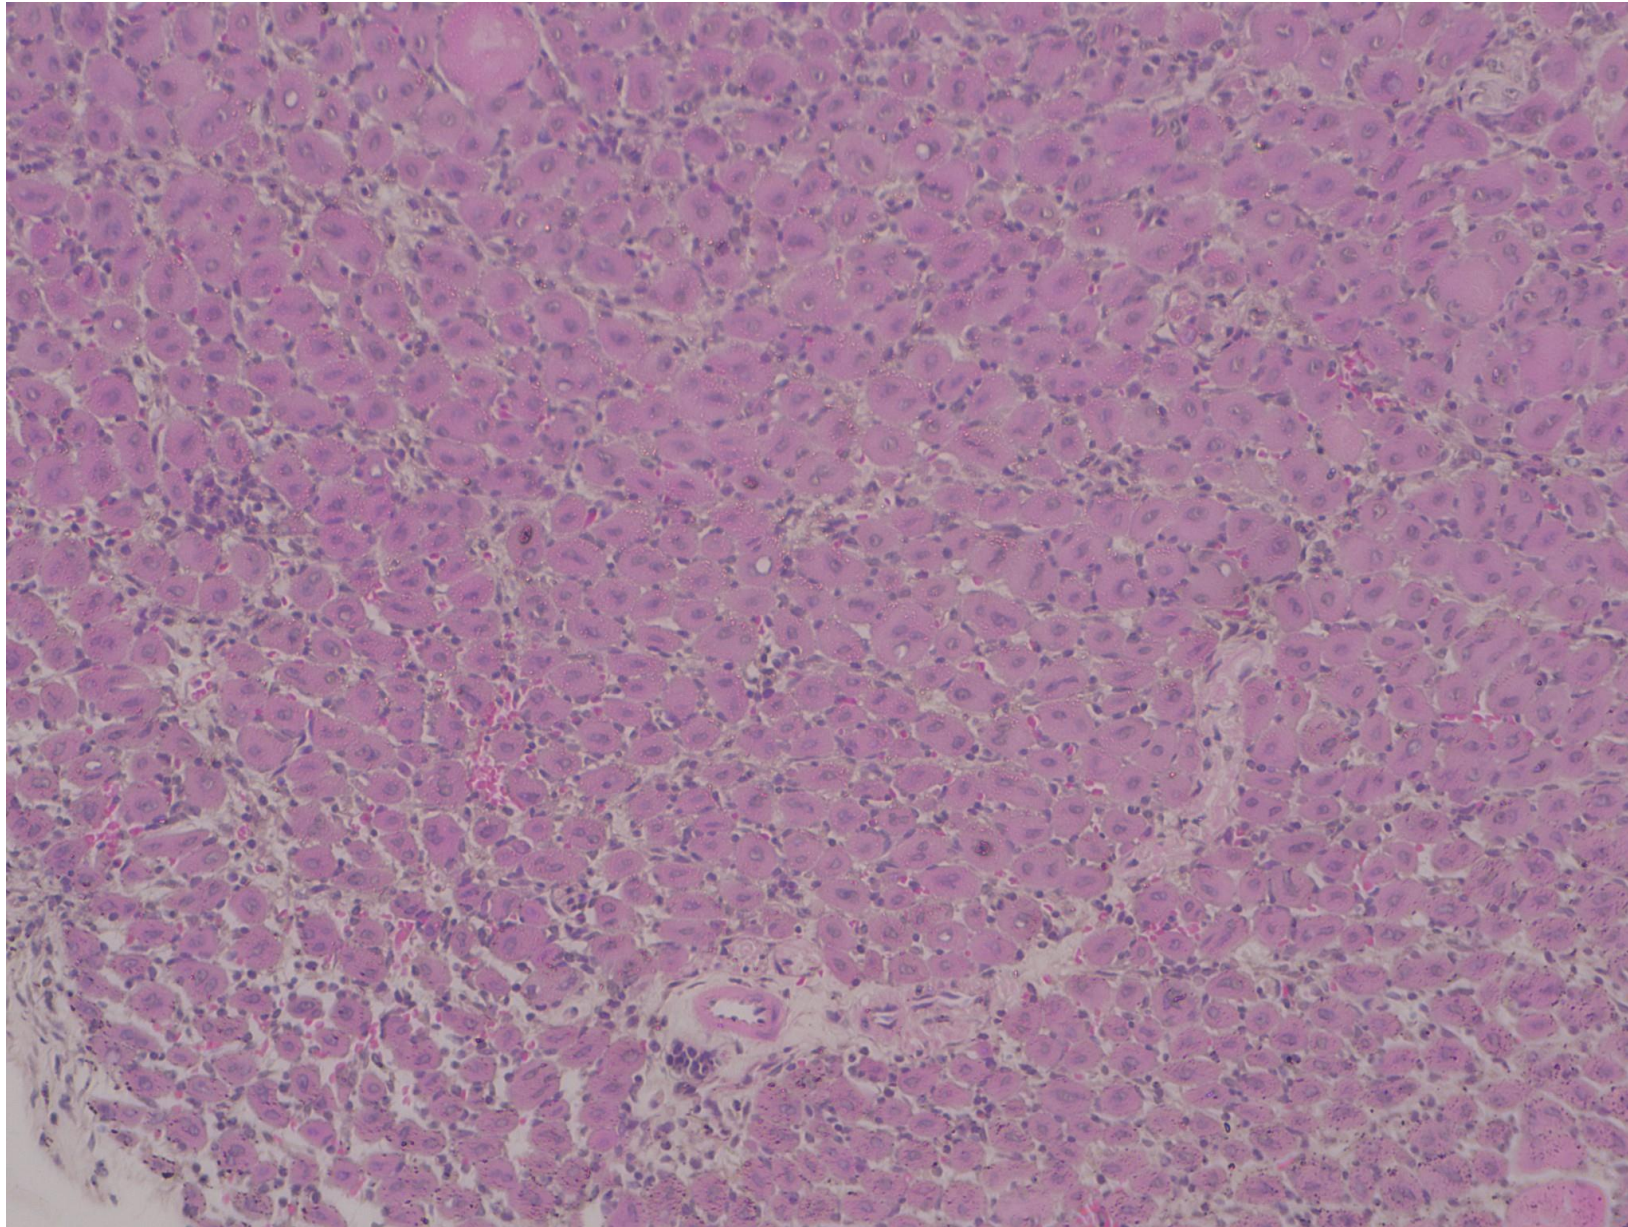

Figure 1B

CTx d10

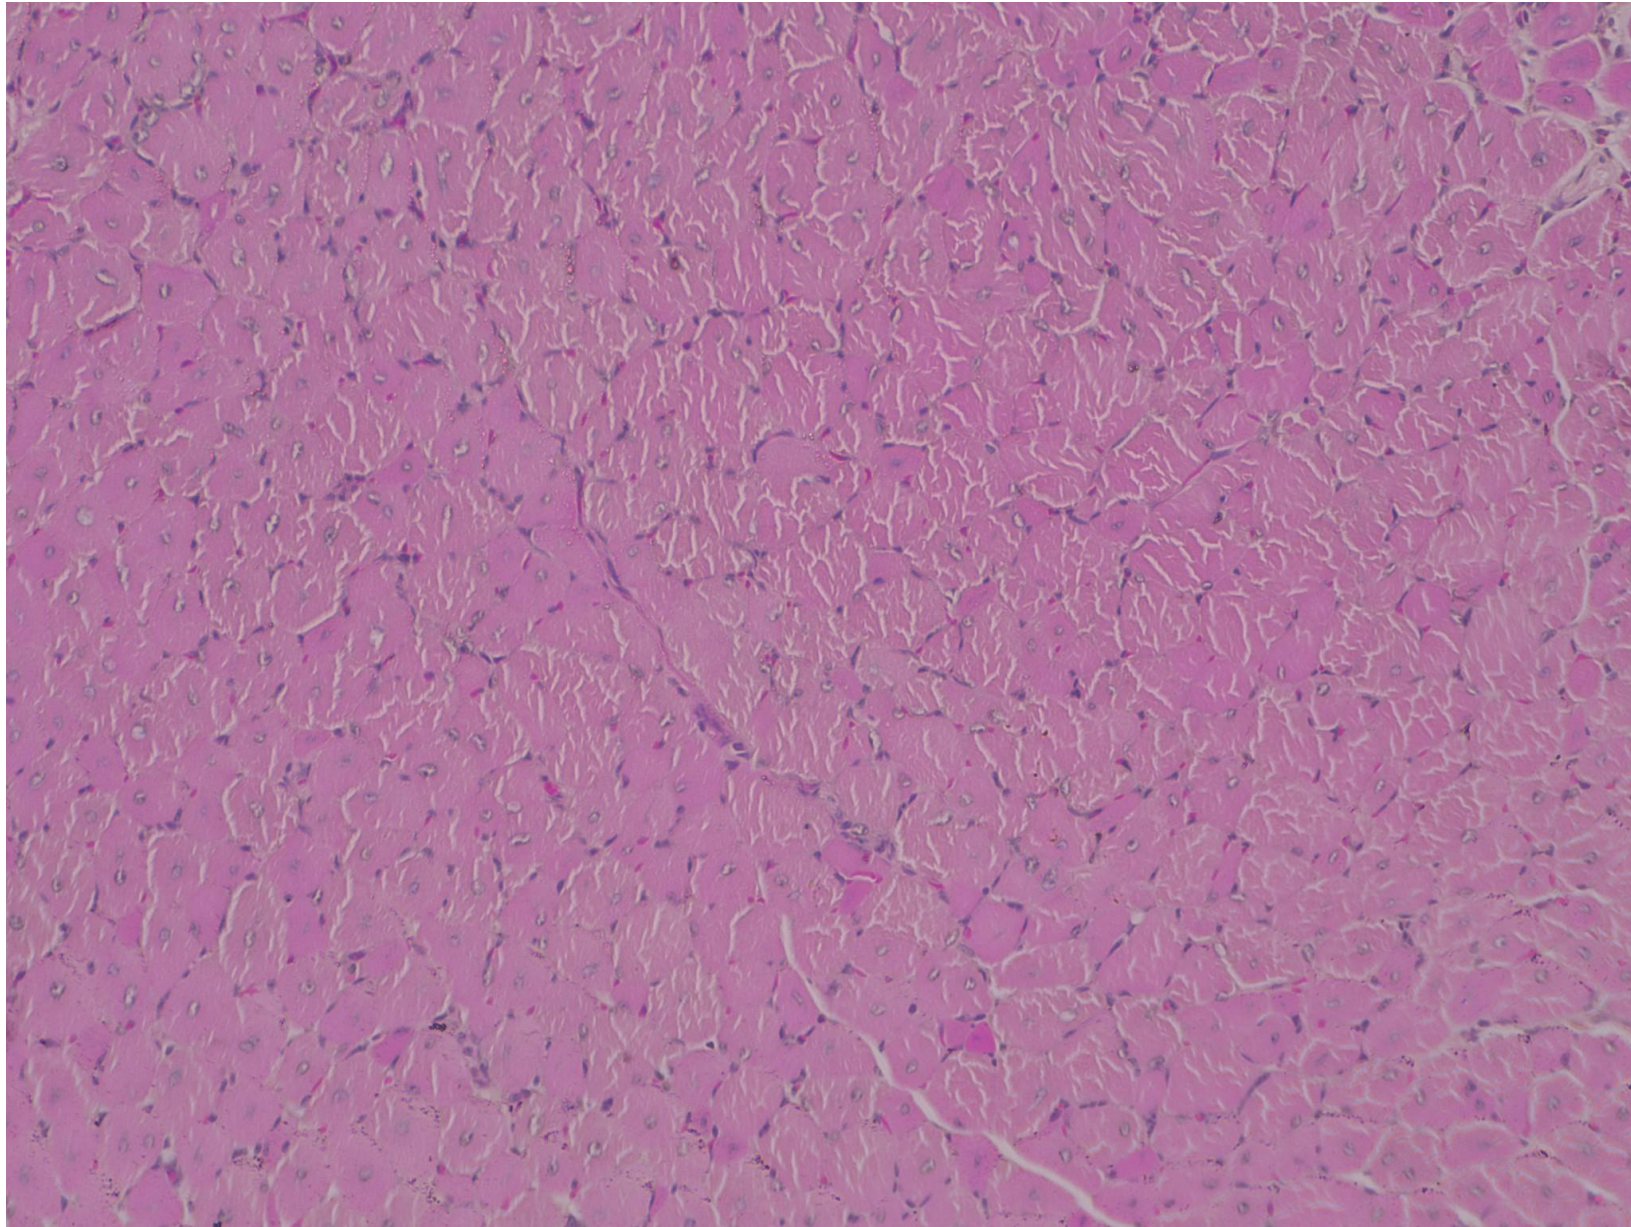

Figure 4A

CTx d0 - DAPI

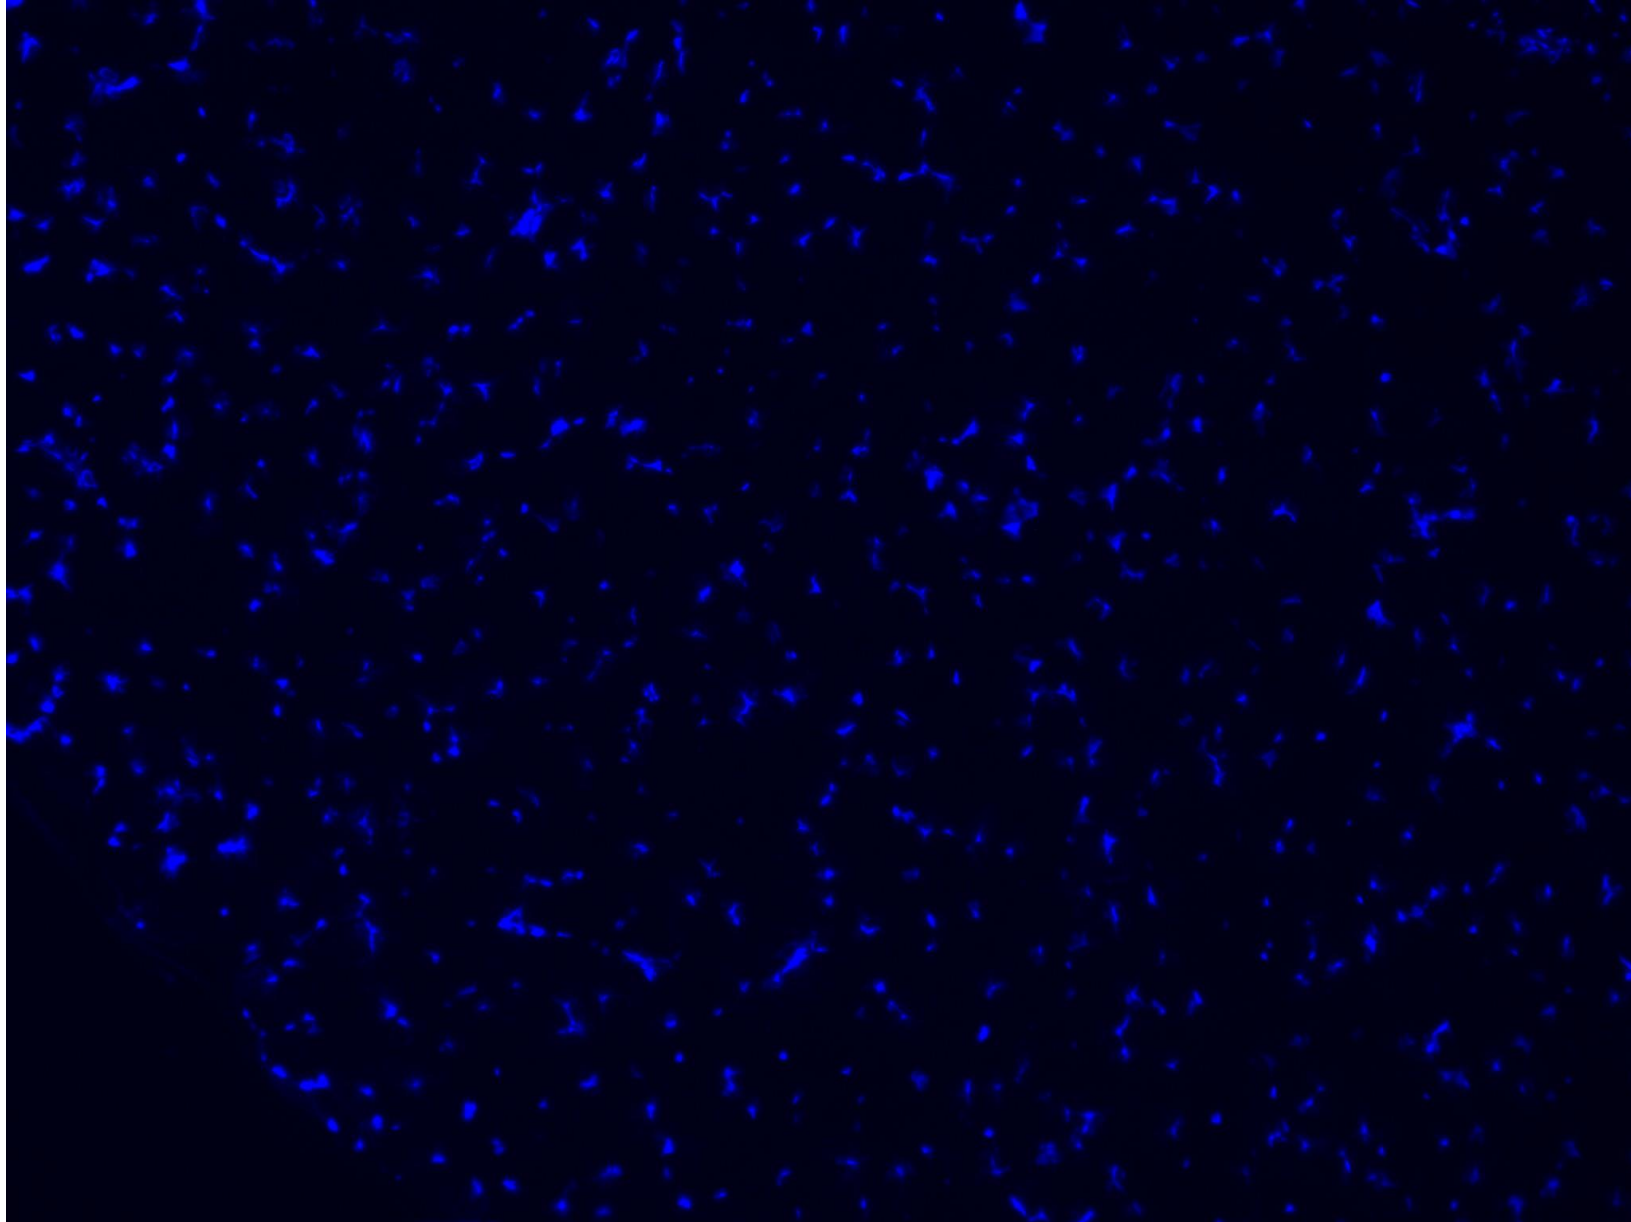

Figure 4A

CTx d0 – Ly6C

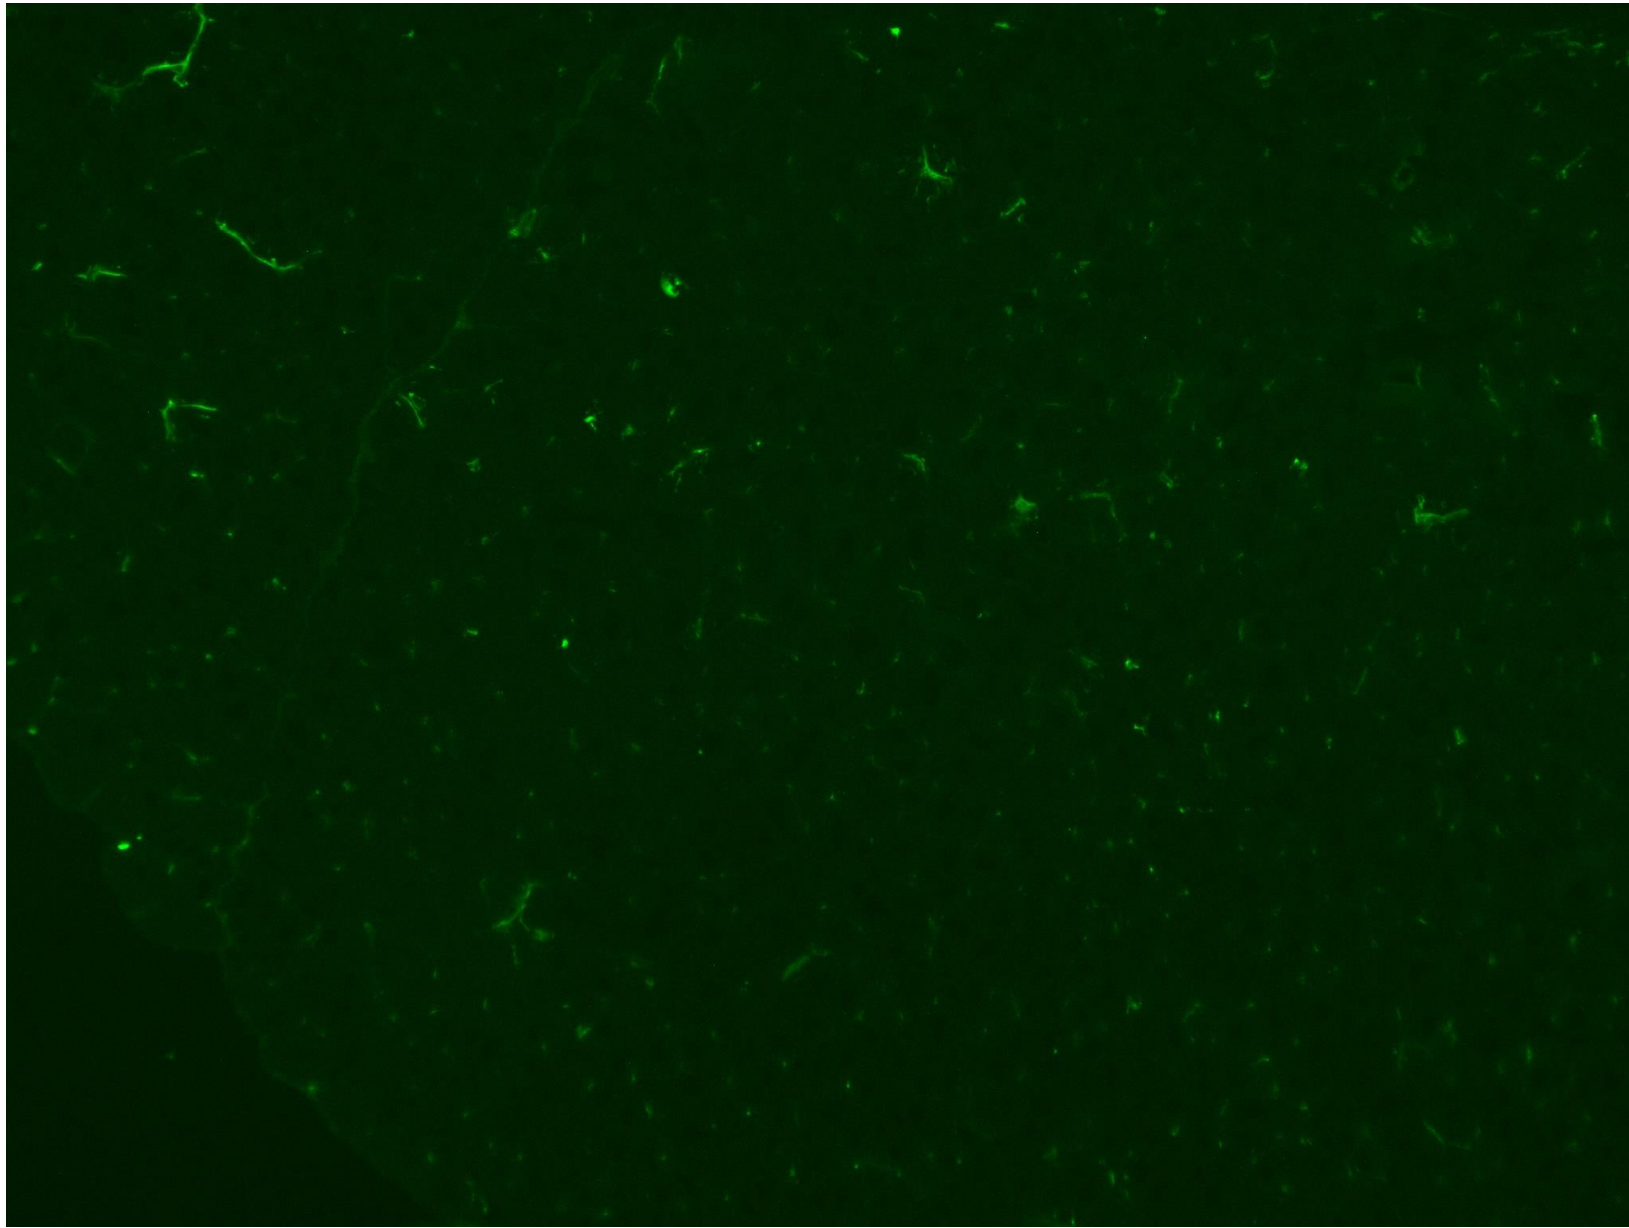

Figure 4A

CTx d0 – IL-7R

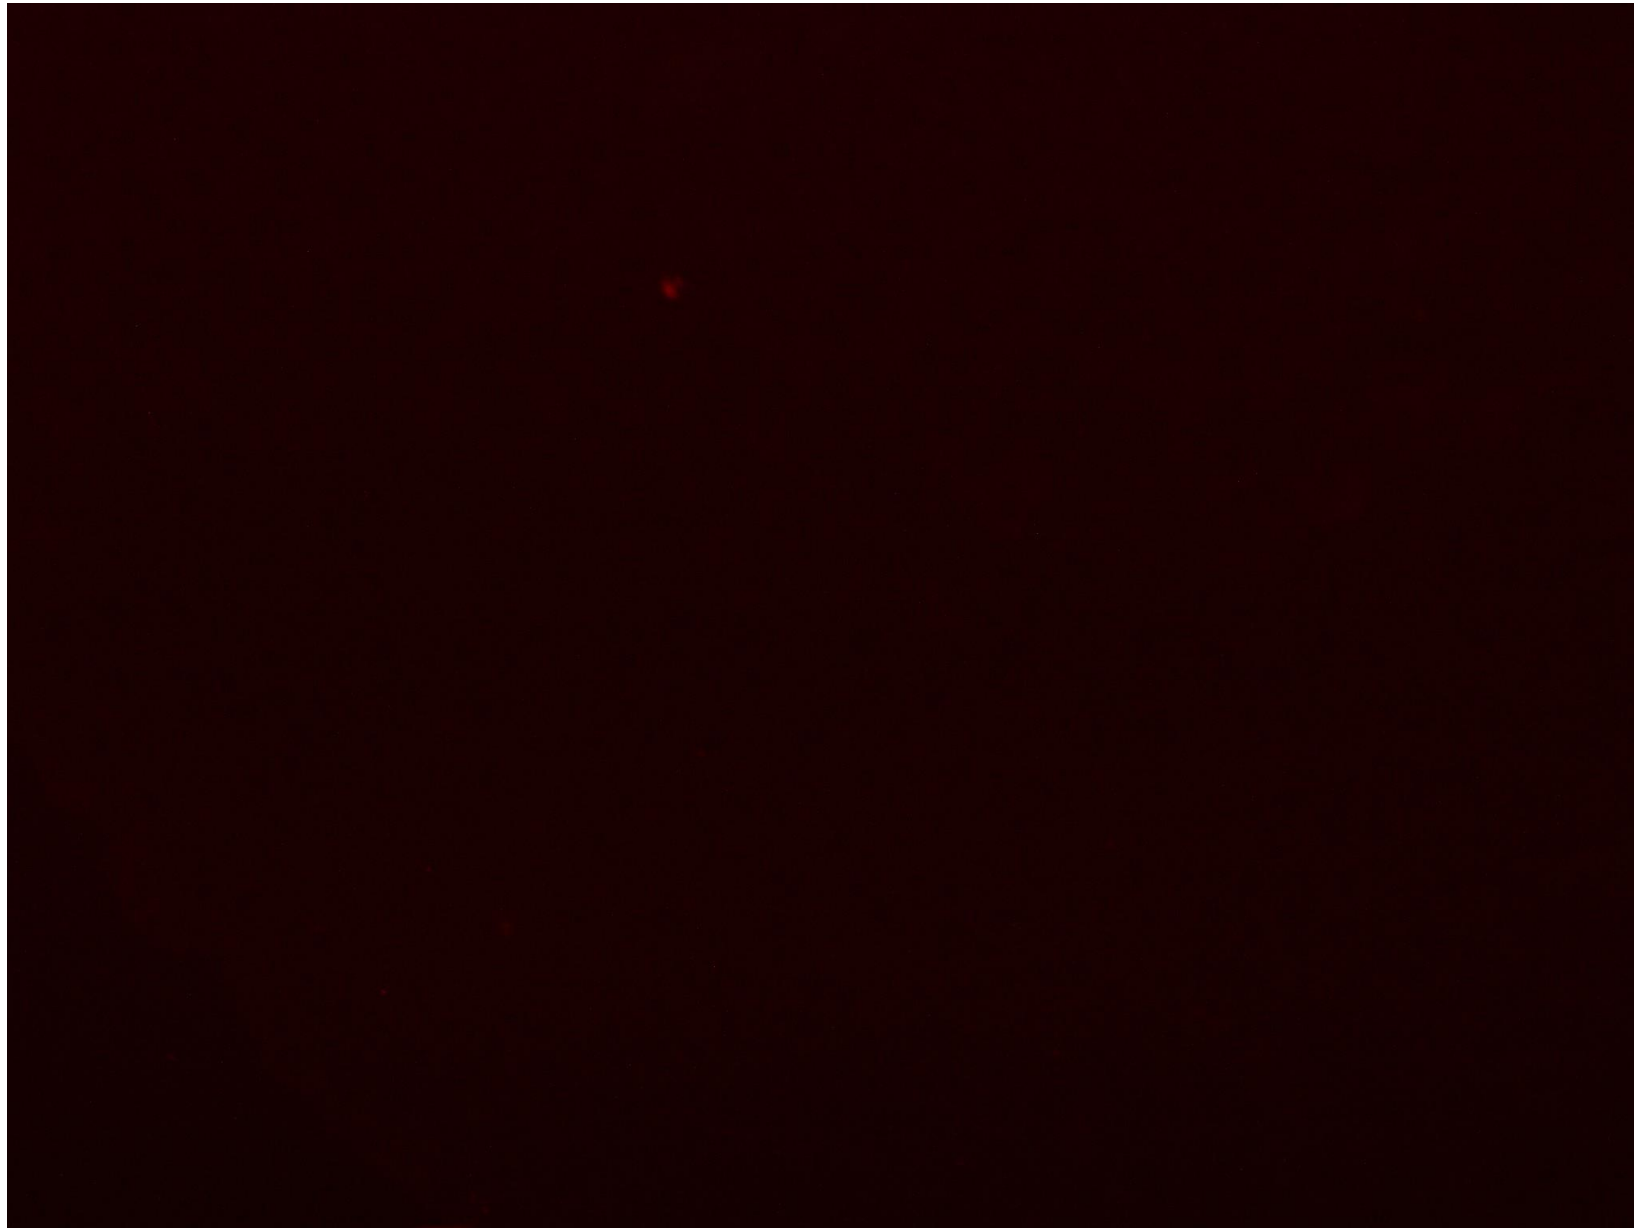

Figure 4A

CTx d0 – CD163

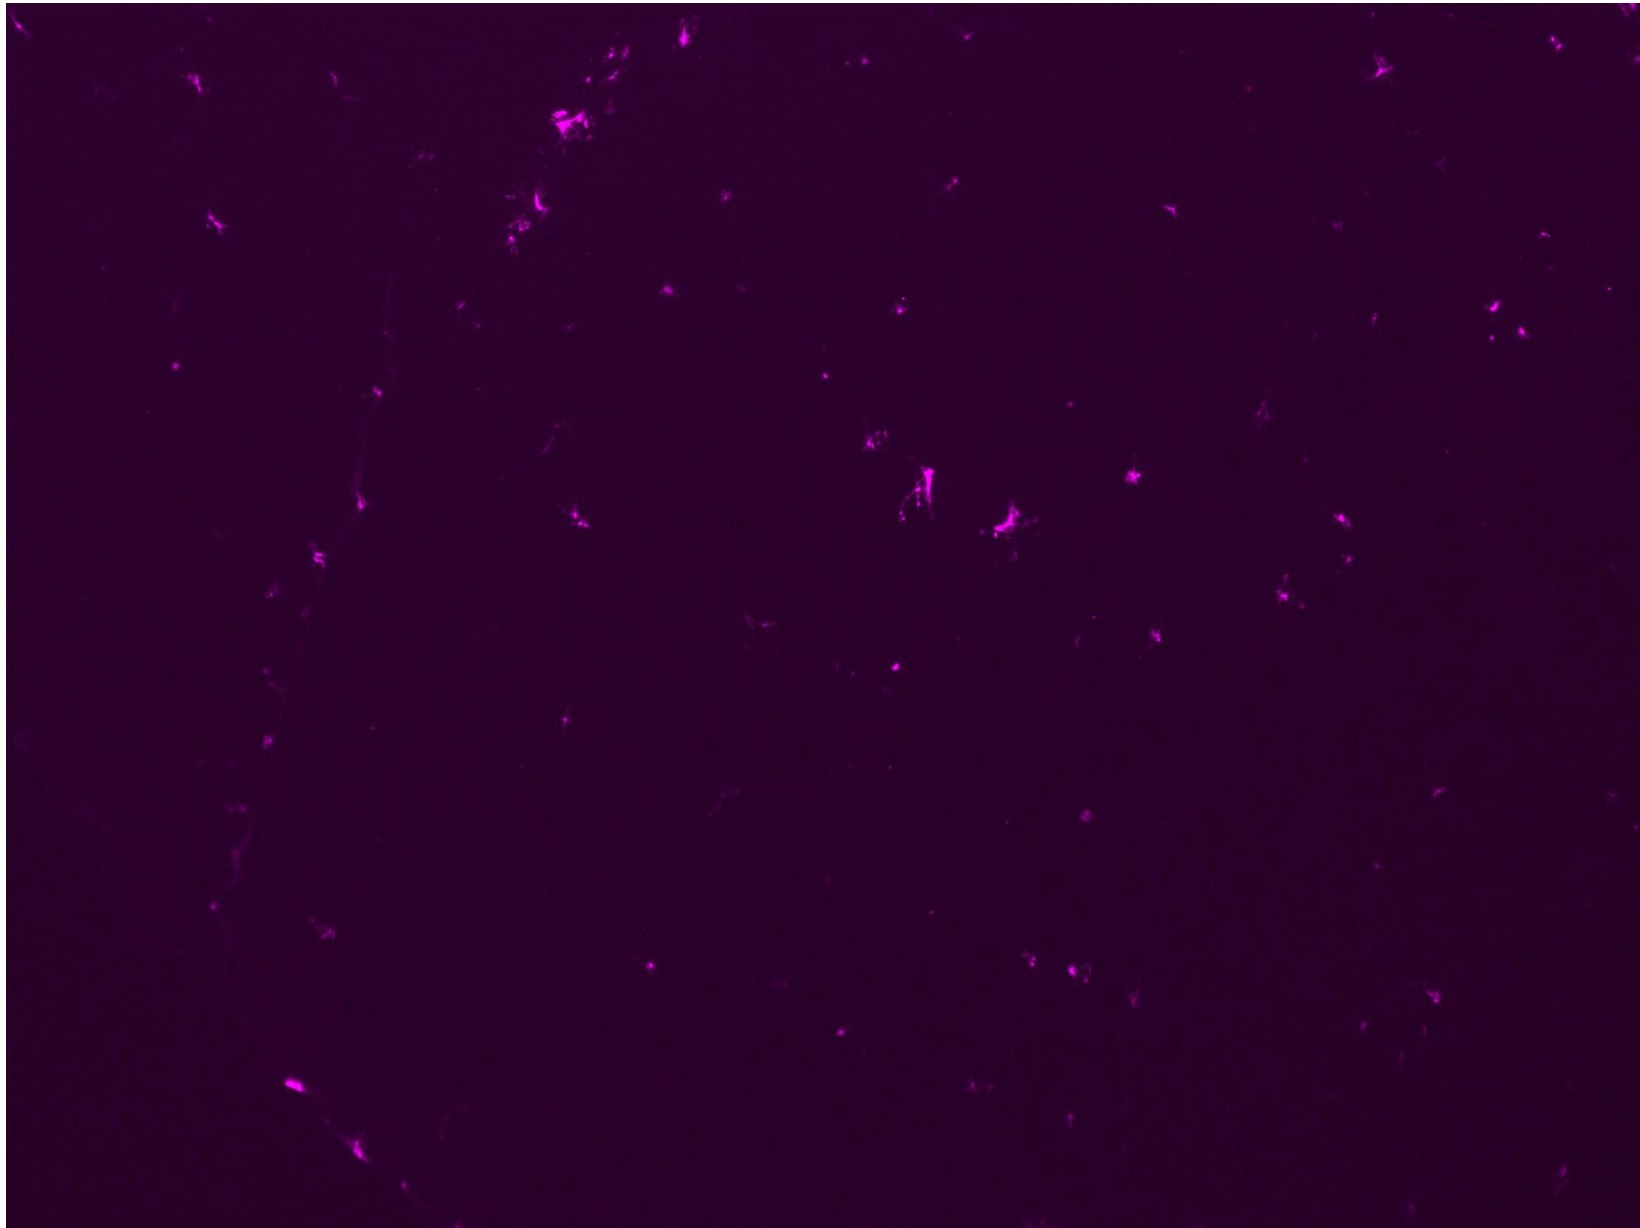

Figure 4A

CTx d3 - DAPI

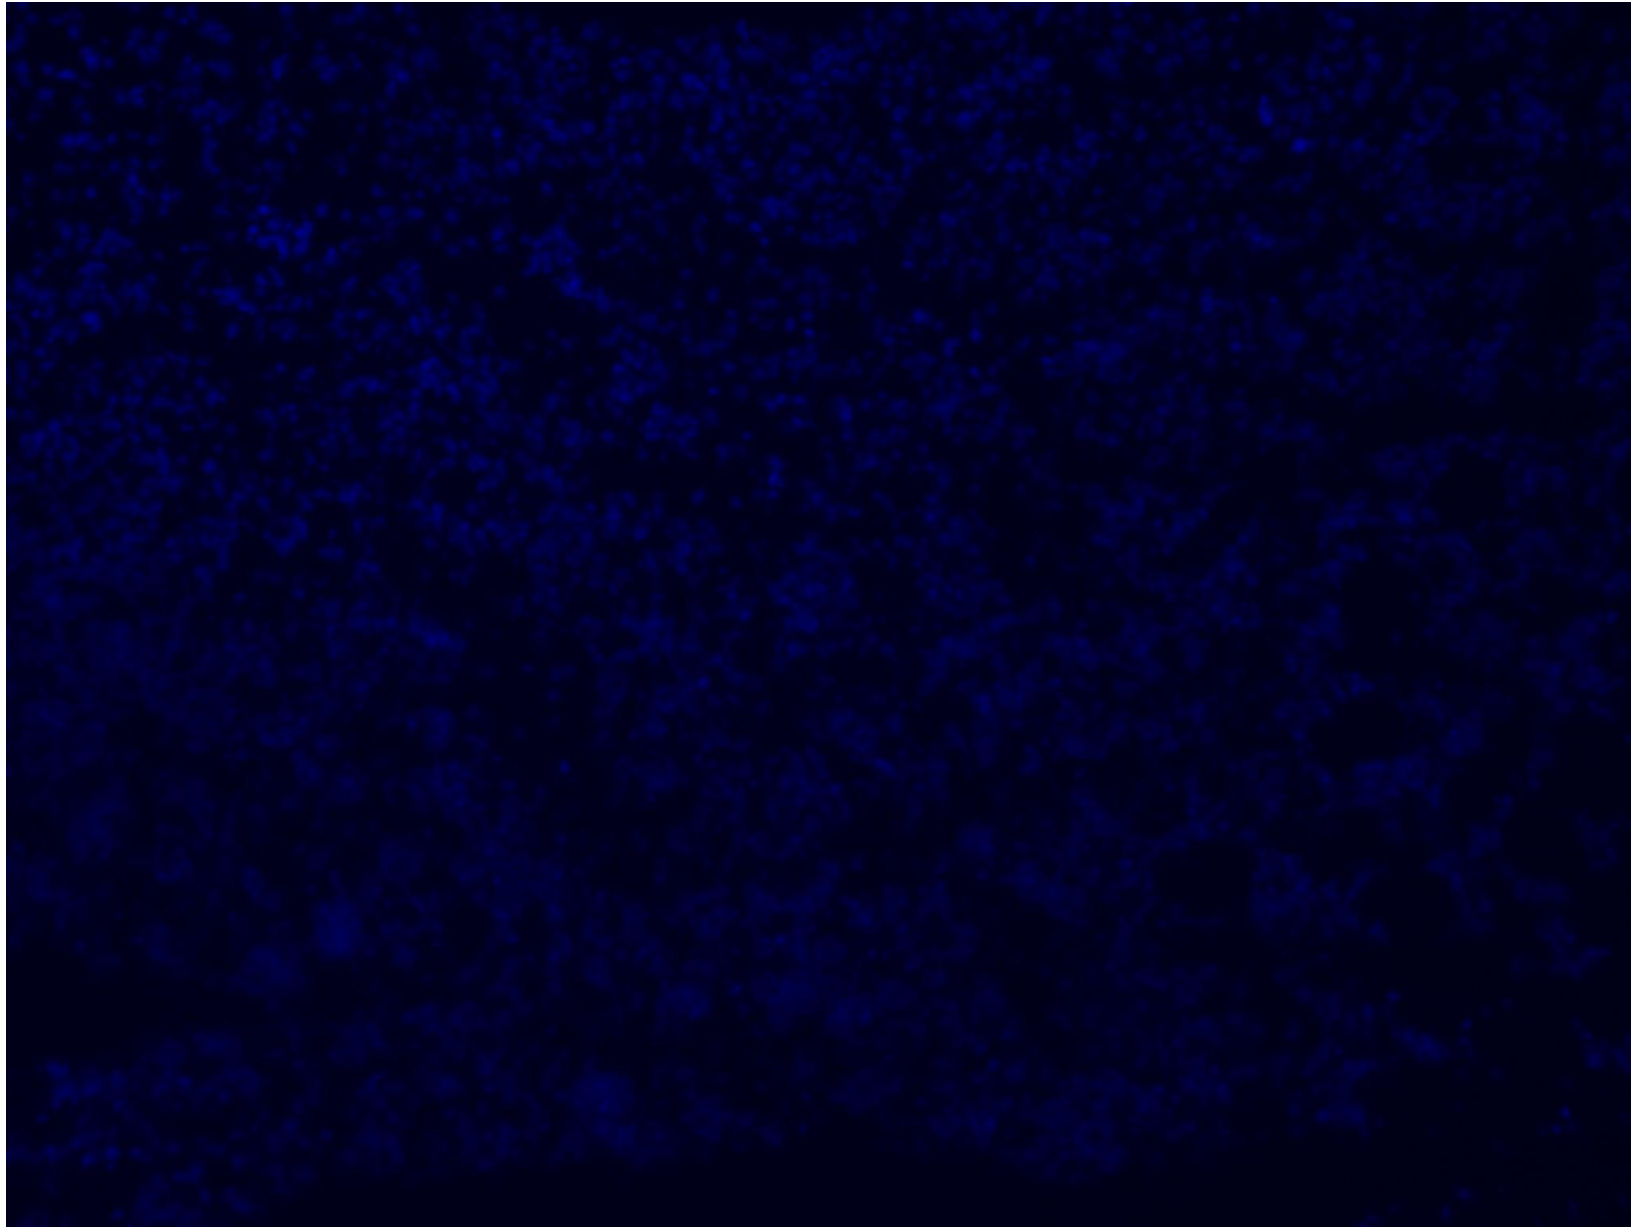

Figure 4A

CTx d3 – Ly6C

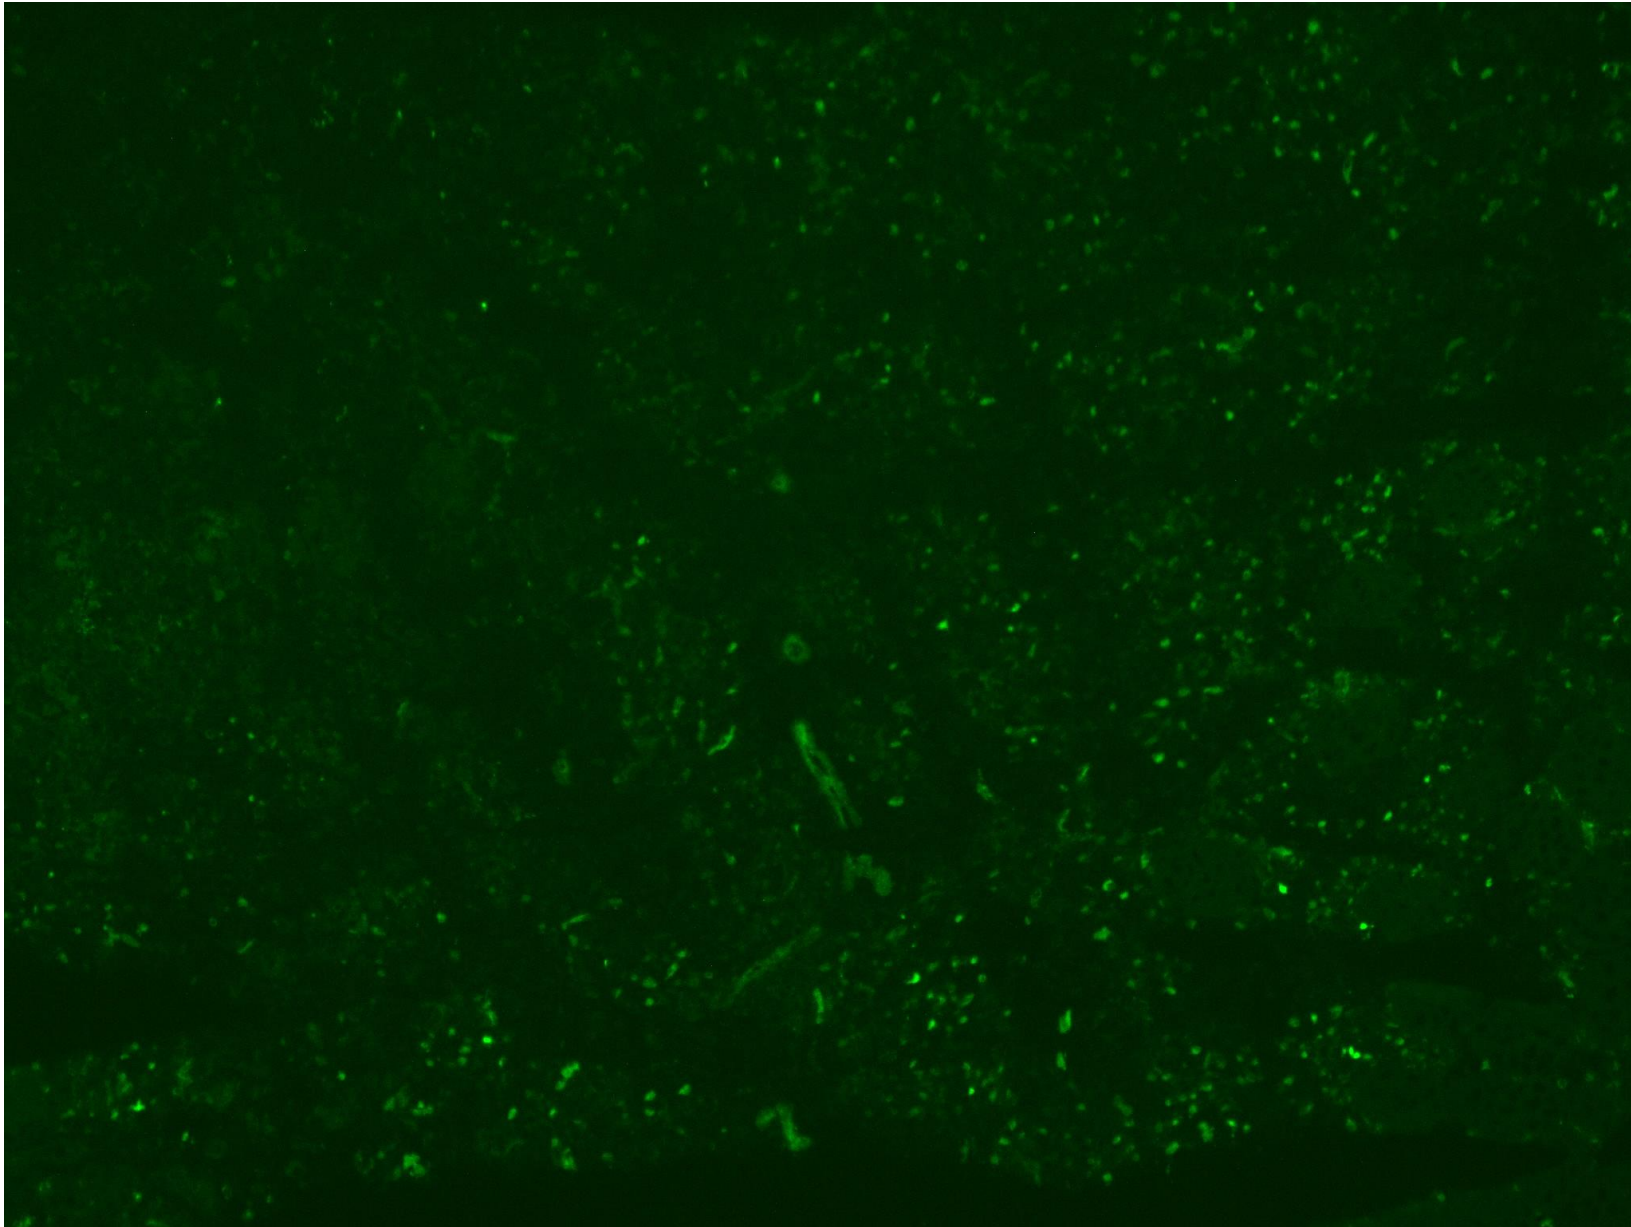

Figure 4A

CTx d3 – IL-7R

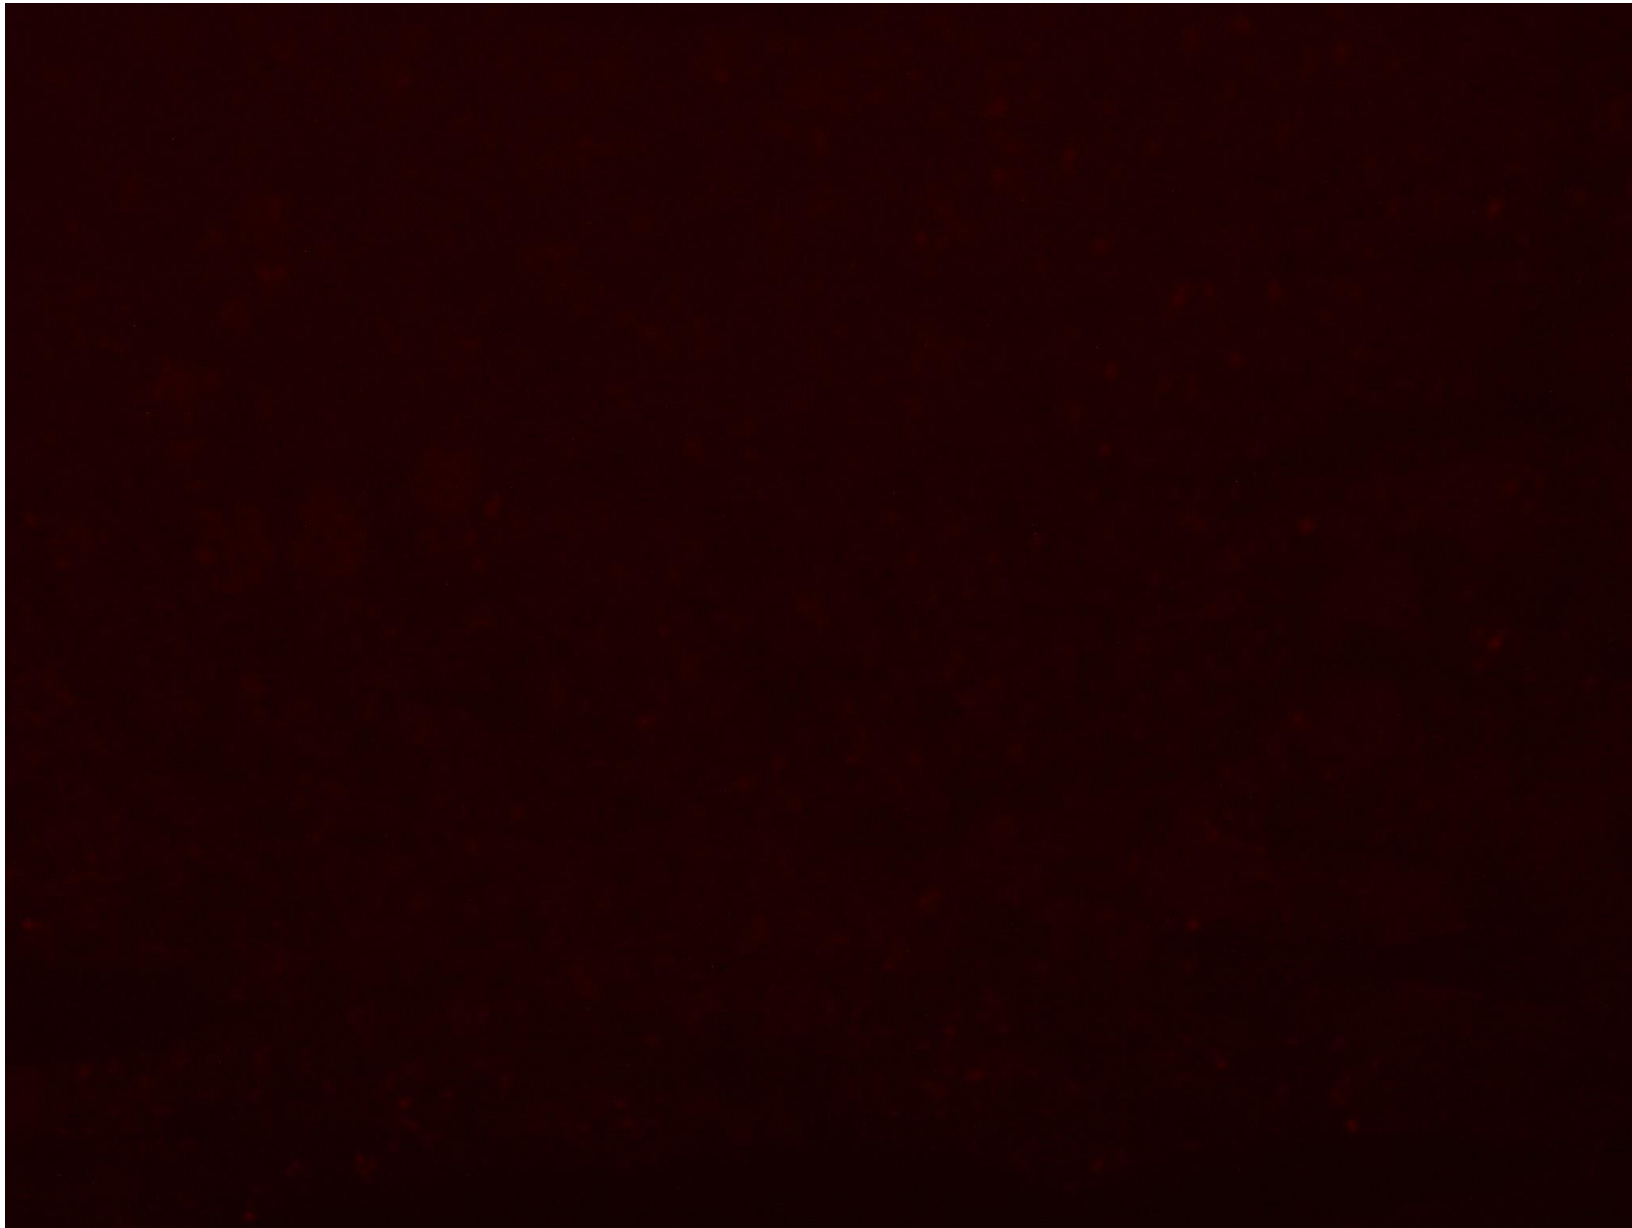

Figure 4A

CTx d3 – CD163

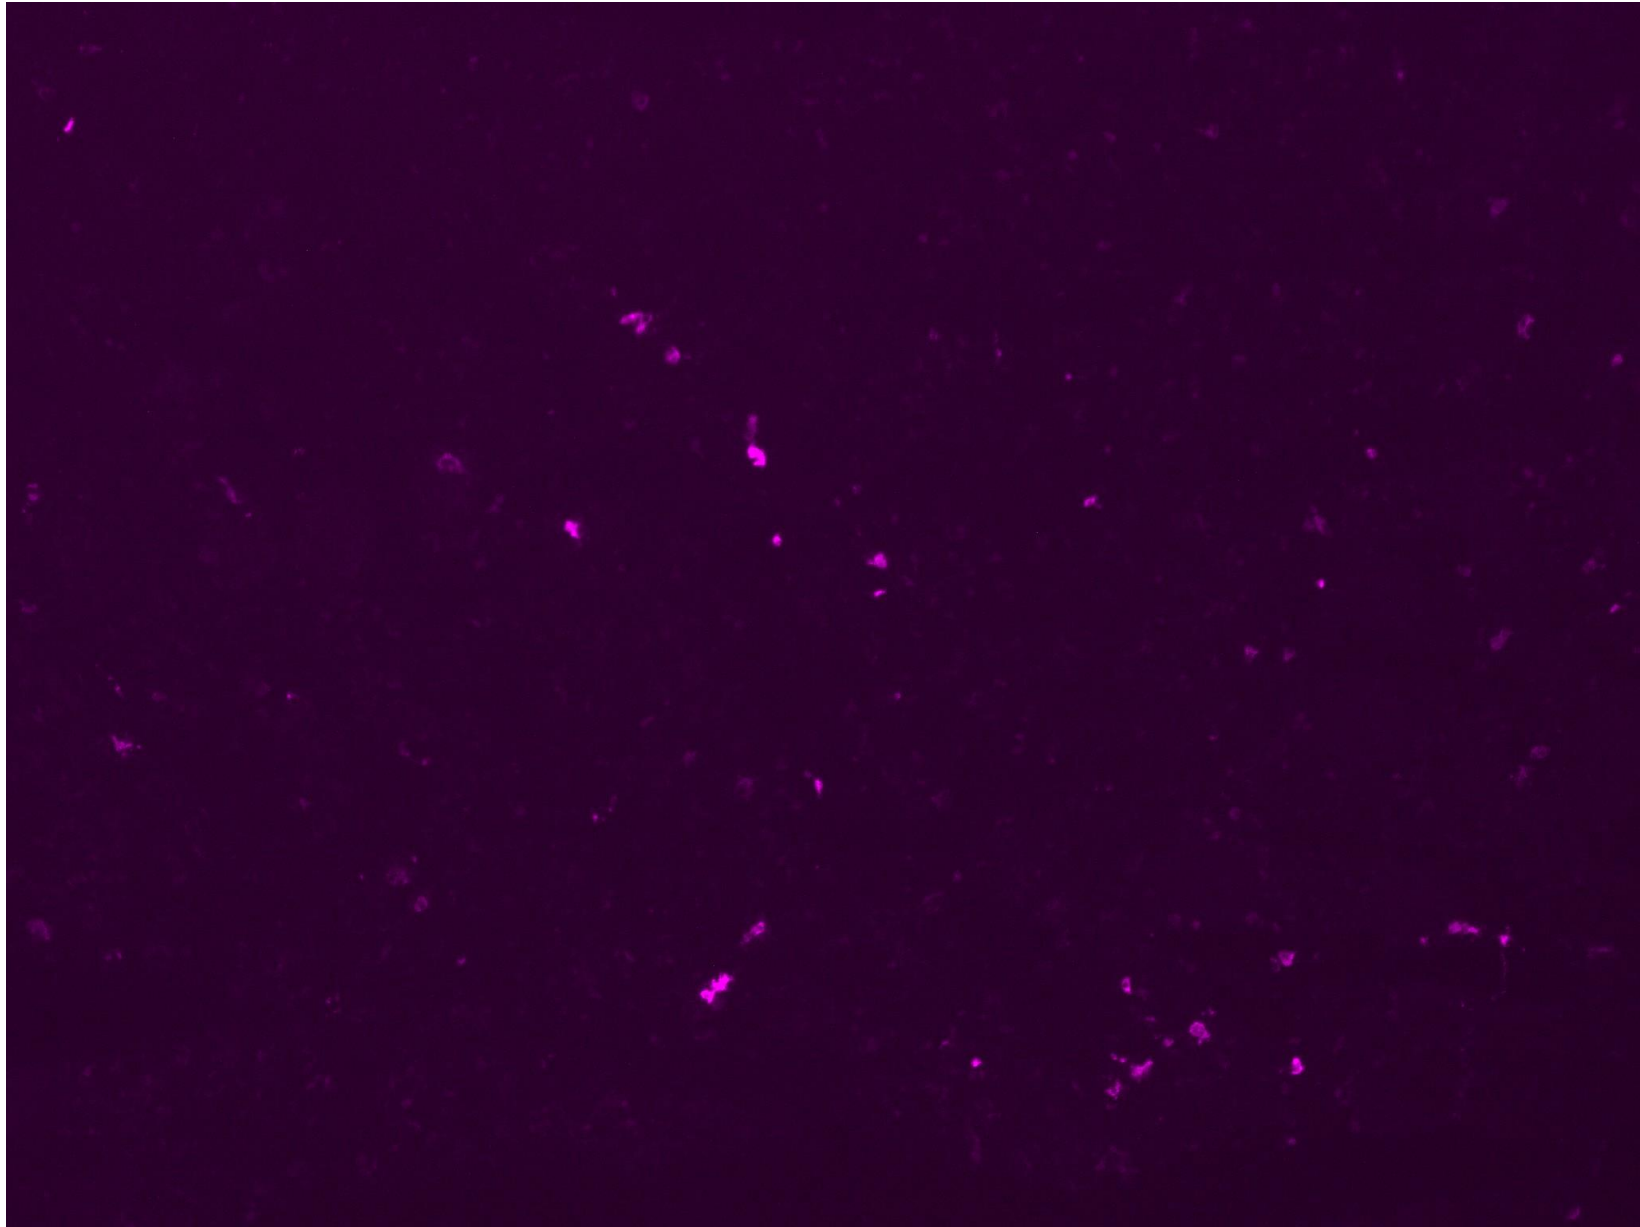

Figure 4A

CTx d4 - DAPI

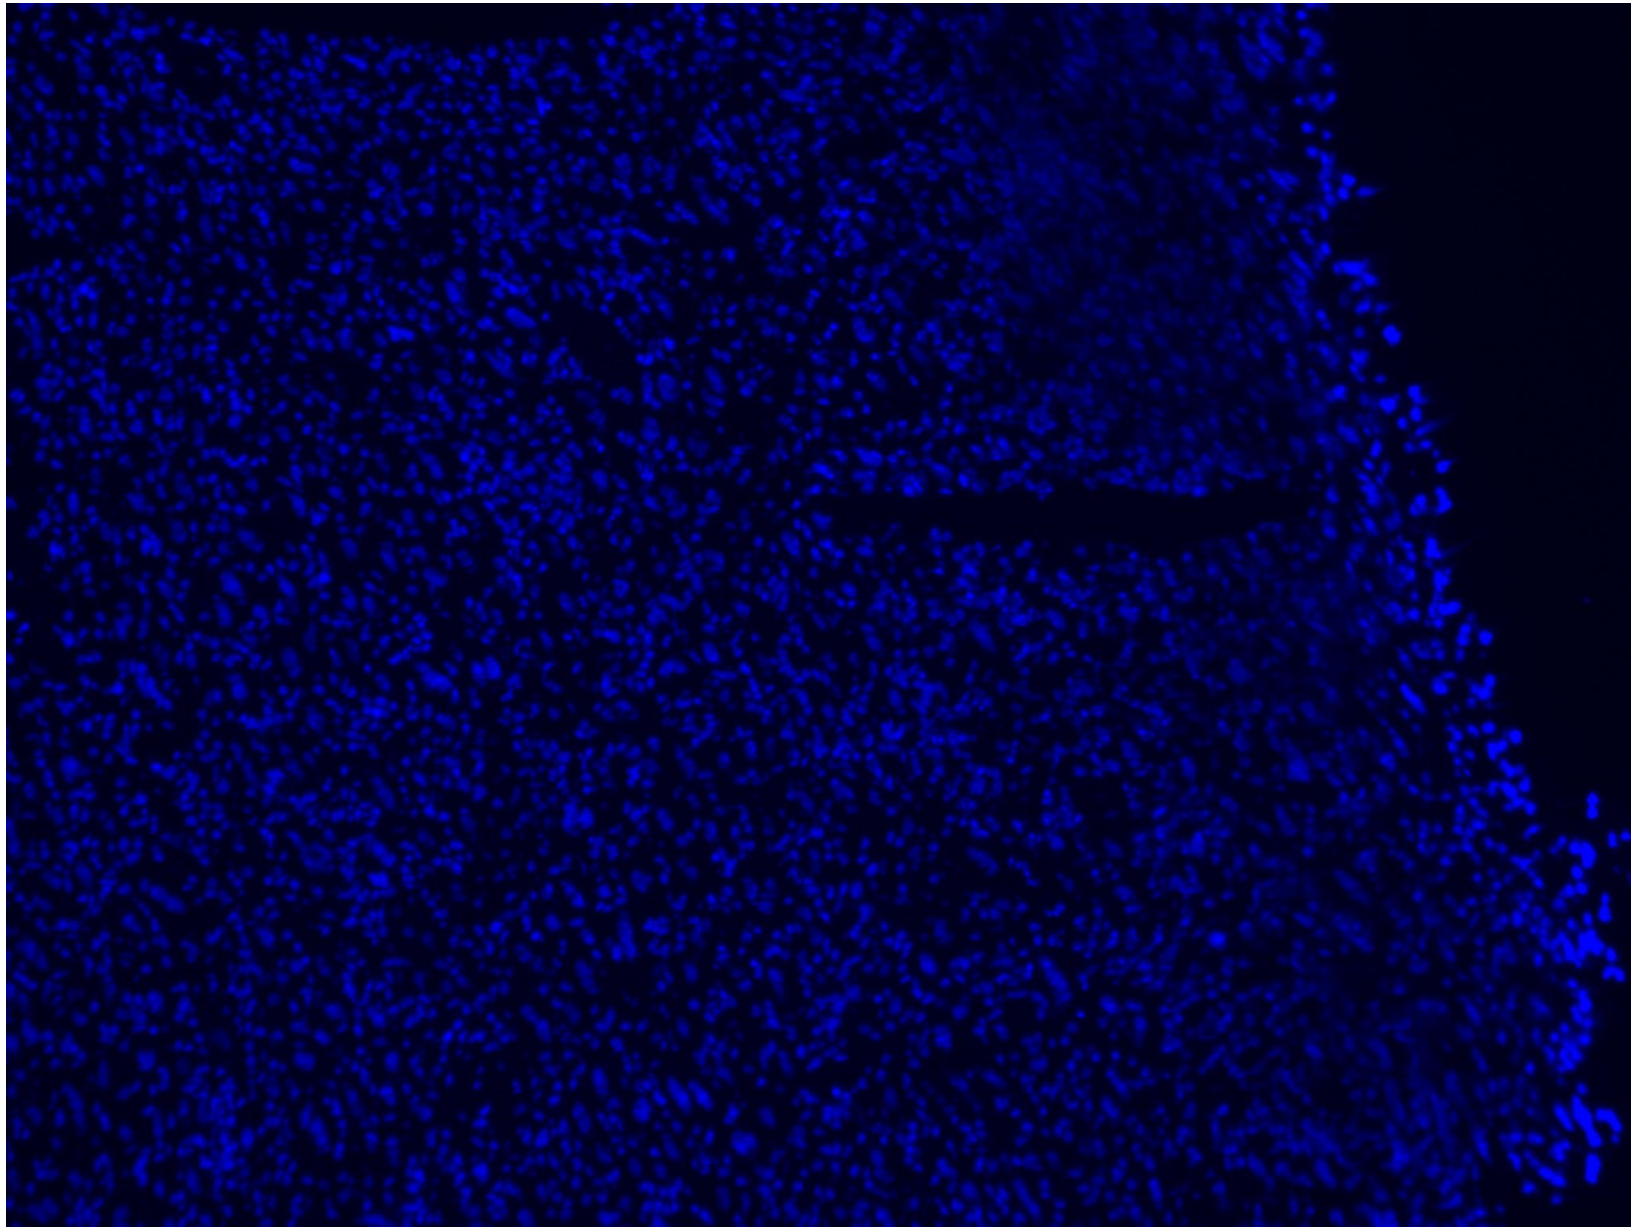

Figure 4A

CTx d4 – Ly6C

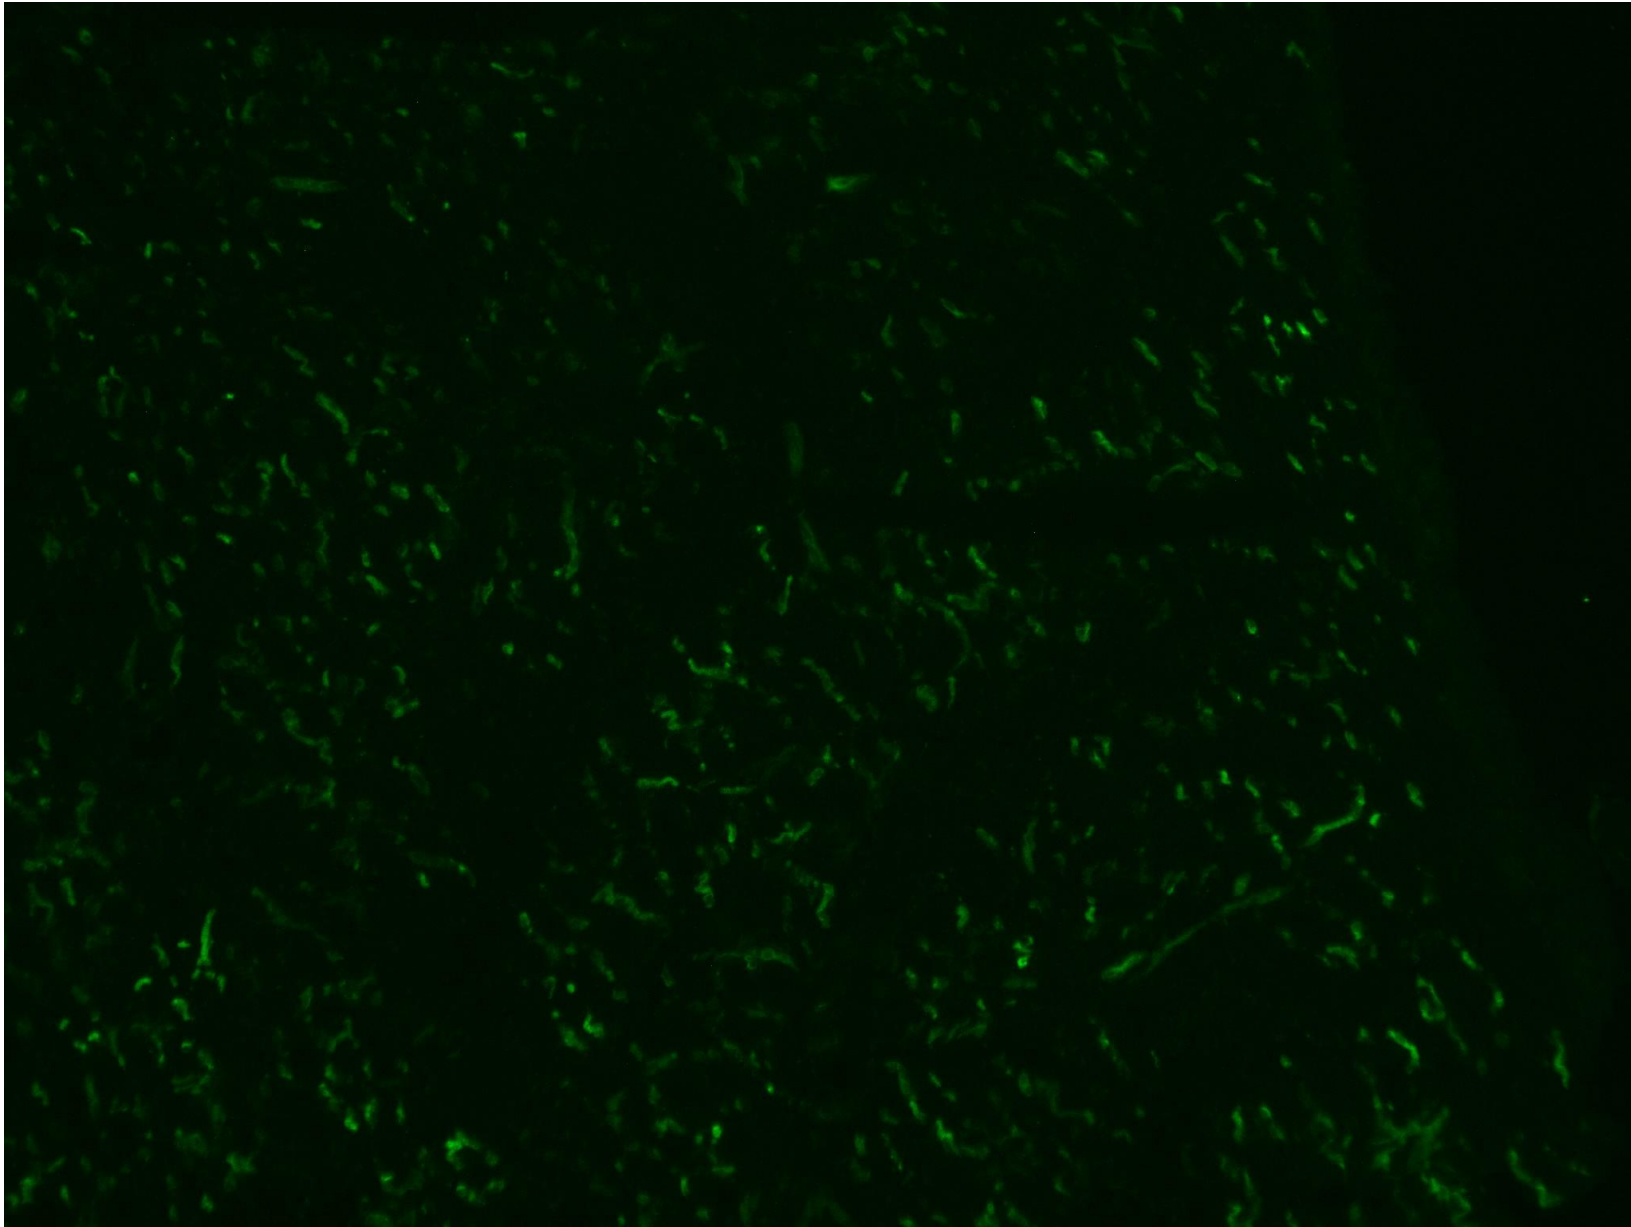

Figure 4A

CTx d4 – IL-7R

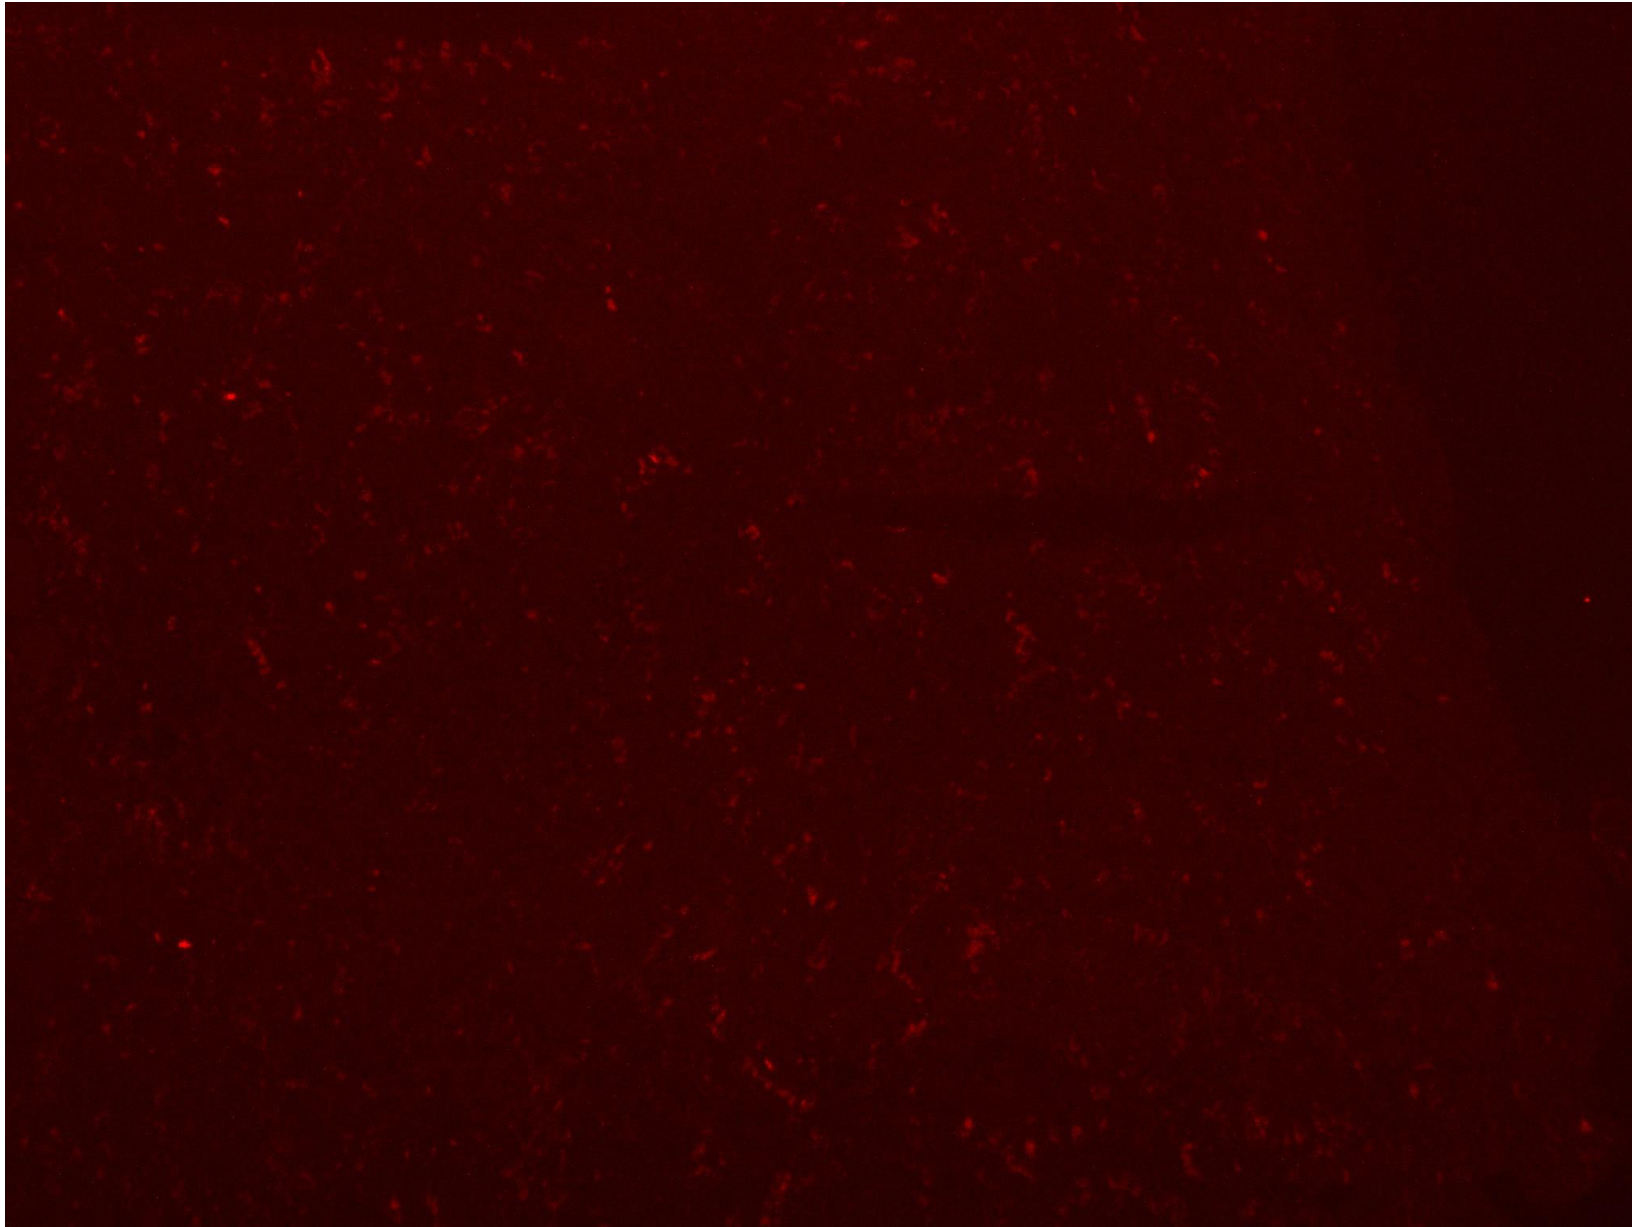

Figure 4A

CTx d4 – CD163

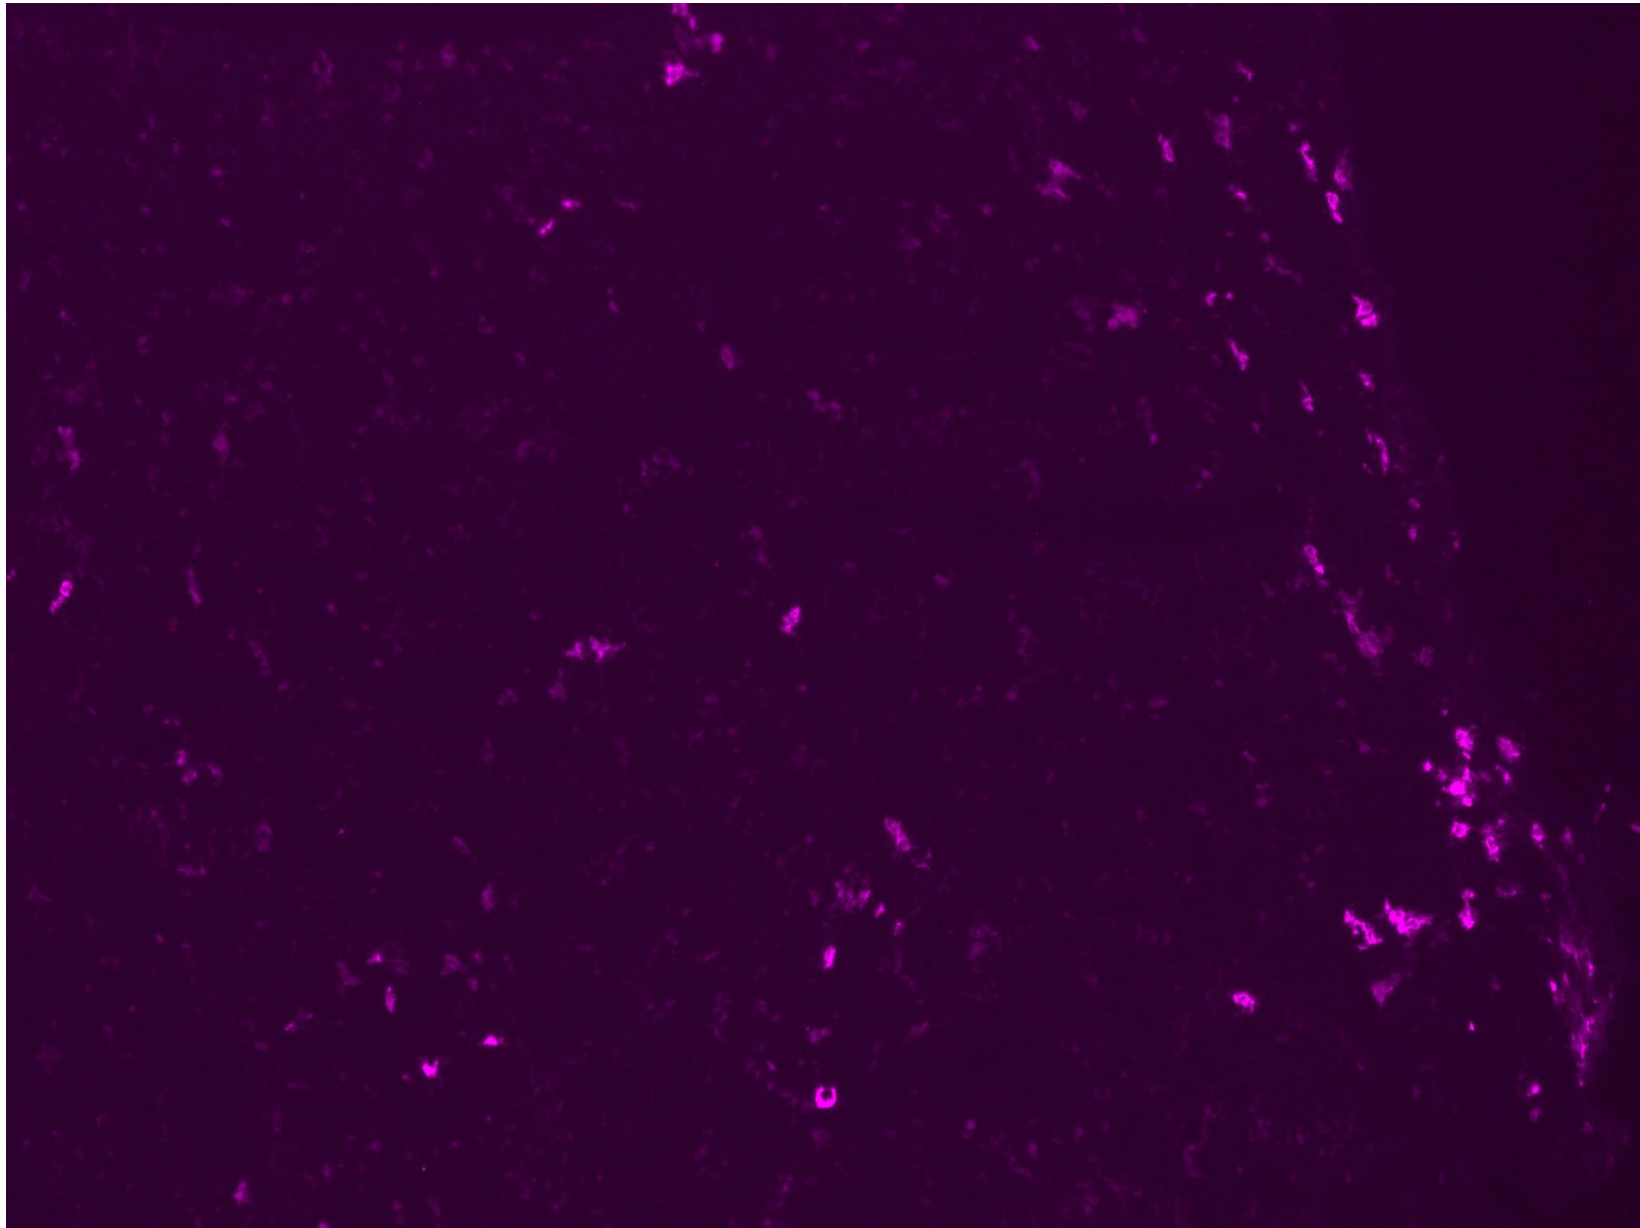

Figure 4A

CTx d5 - DAPI

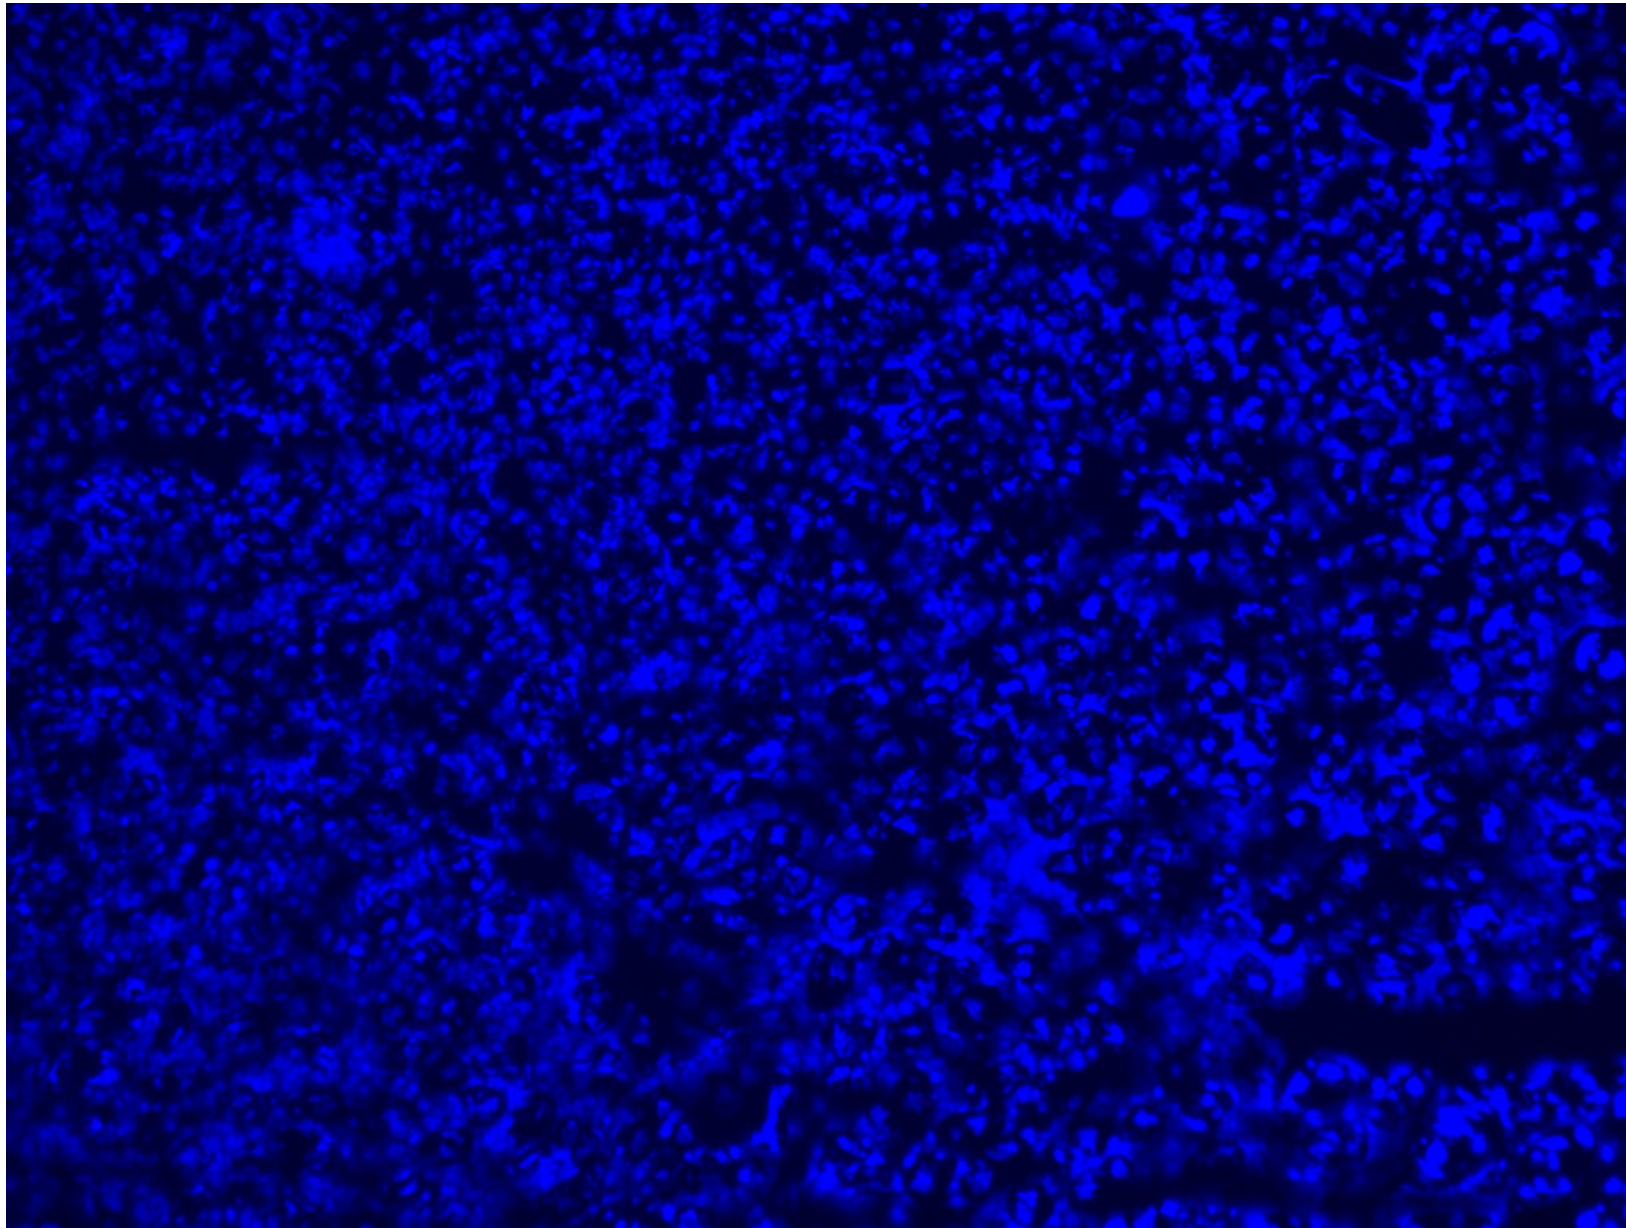

Figure 4A

CTx d5 – Ly6C

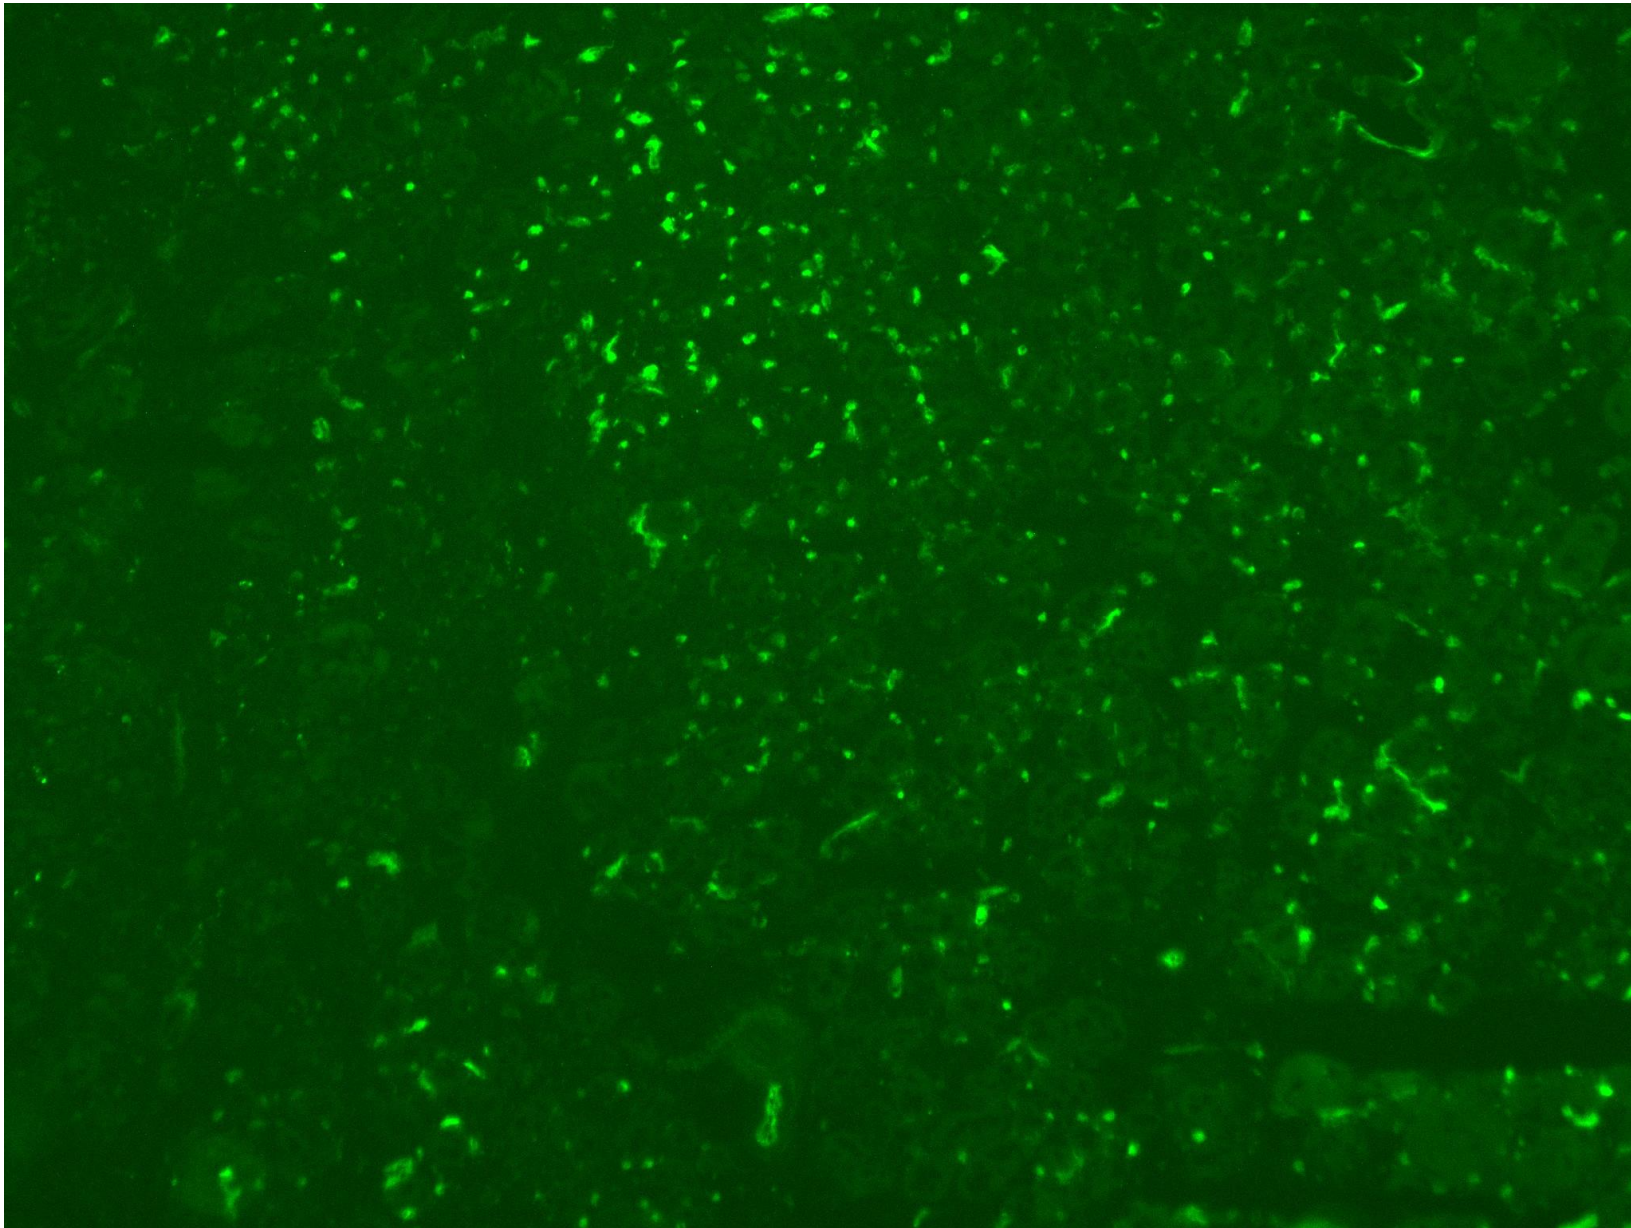

Figure 4A

CTx d5 – IL-7R

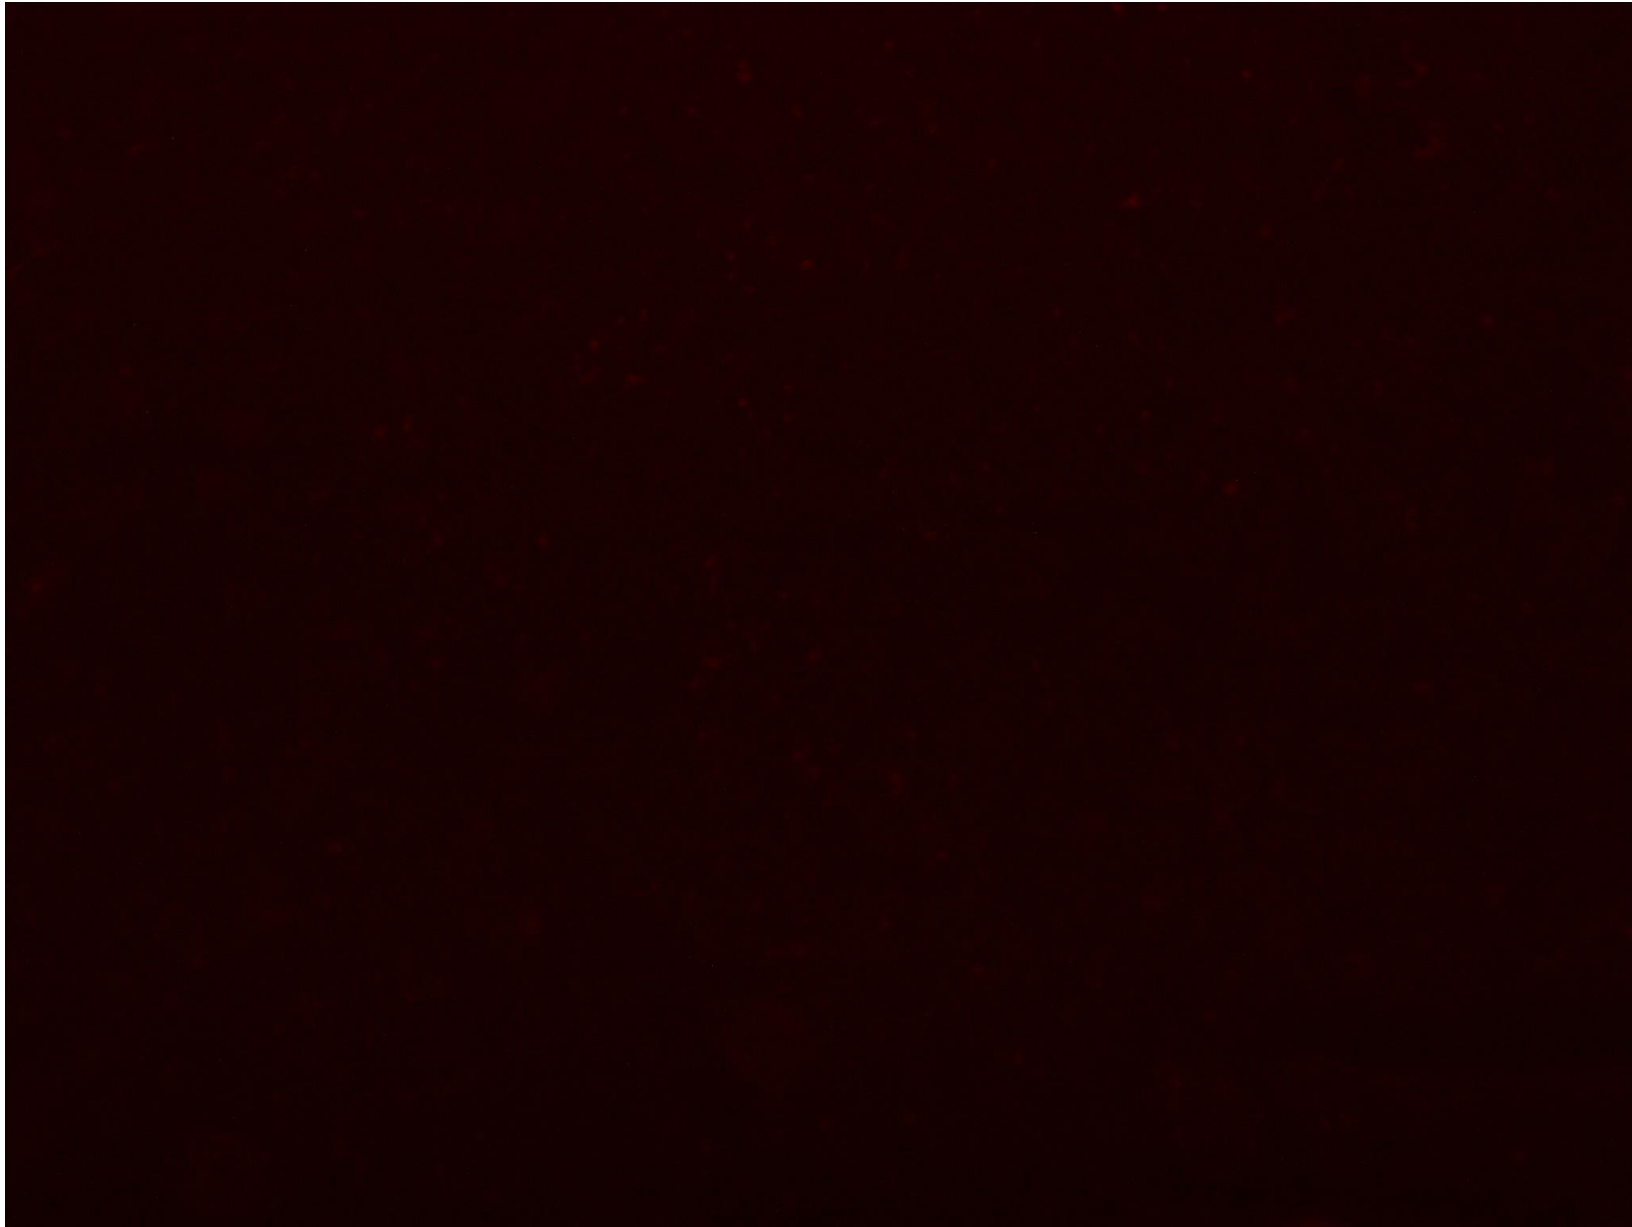

Figure 4A

CTx d5 – CD163

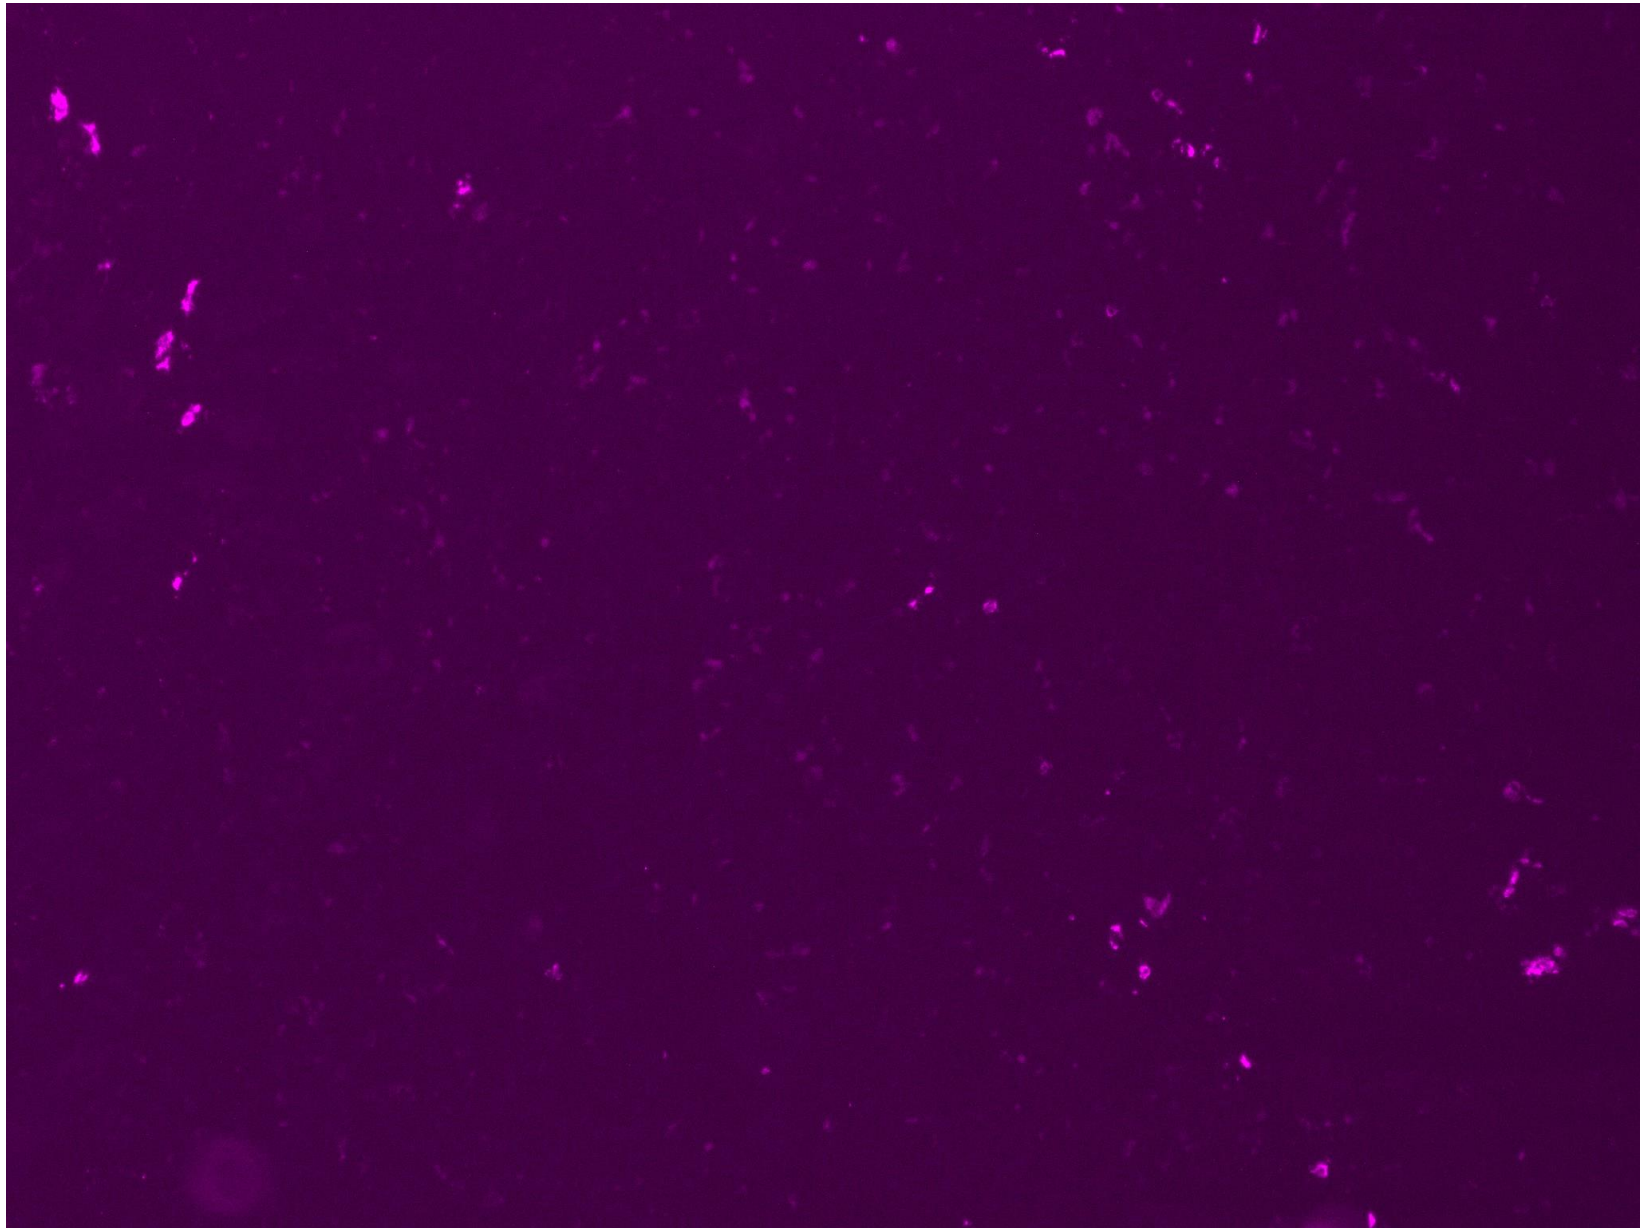

Figure 4B – Upper row

CTx d0 - DAPI

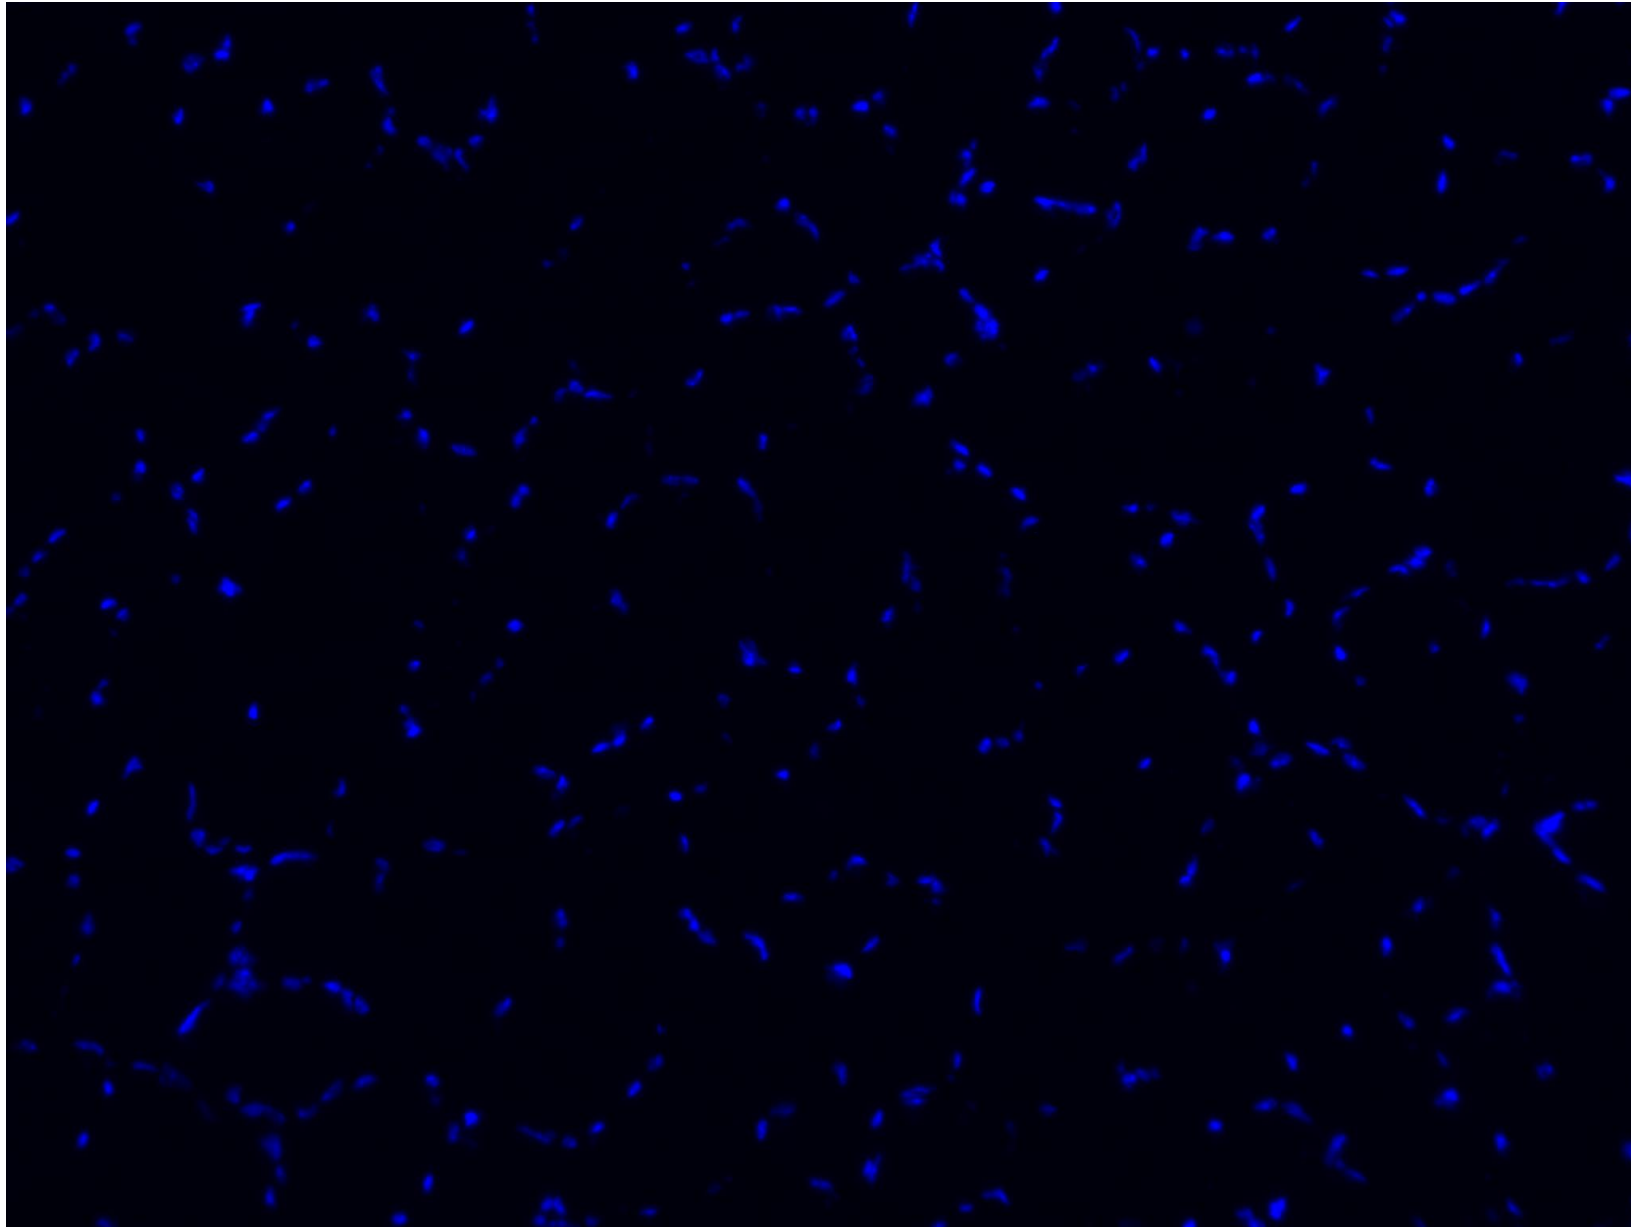

Figure 4B – Upper row

CTx d0 – Ly6C

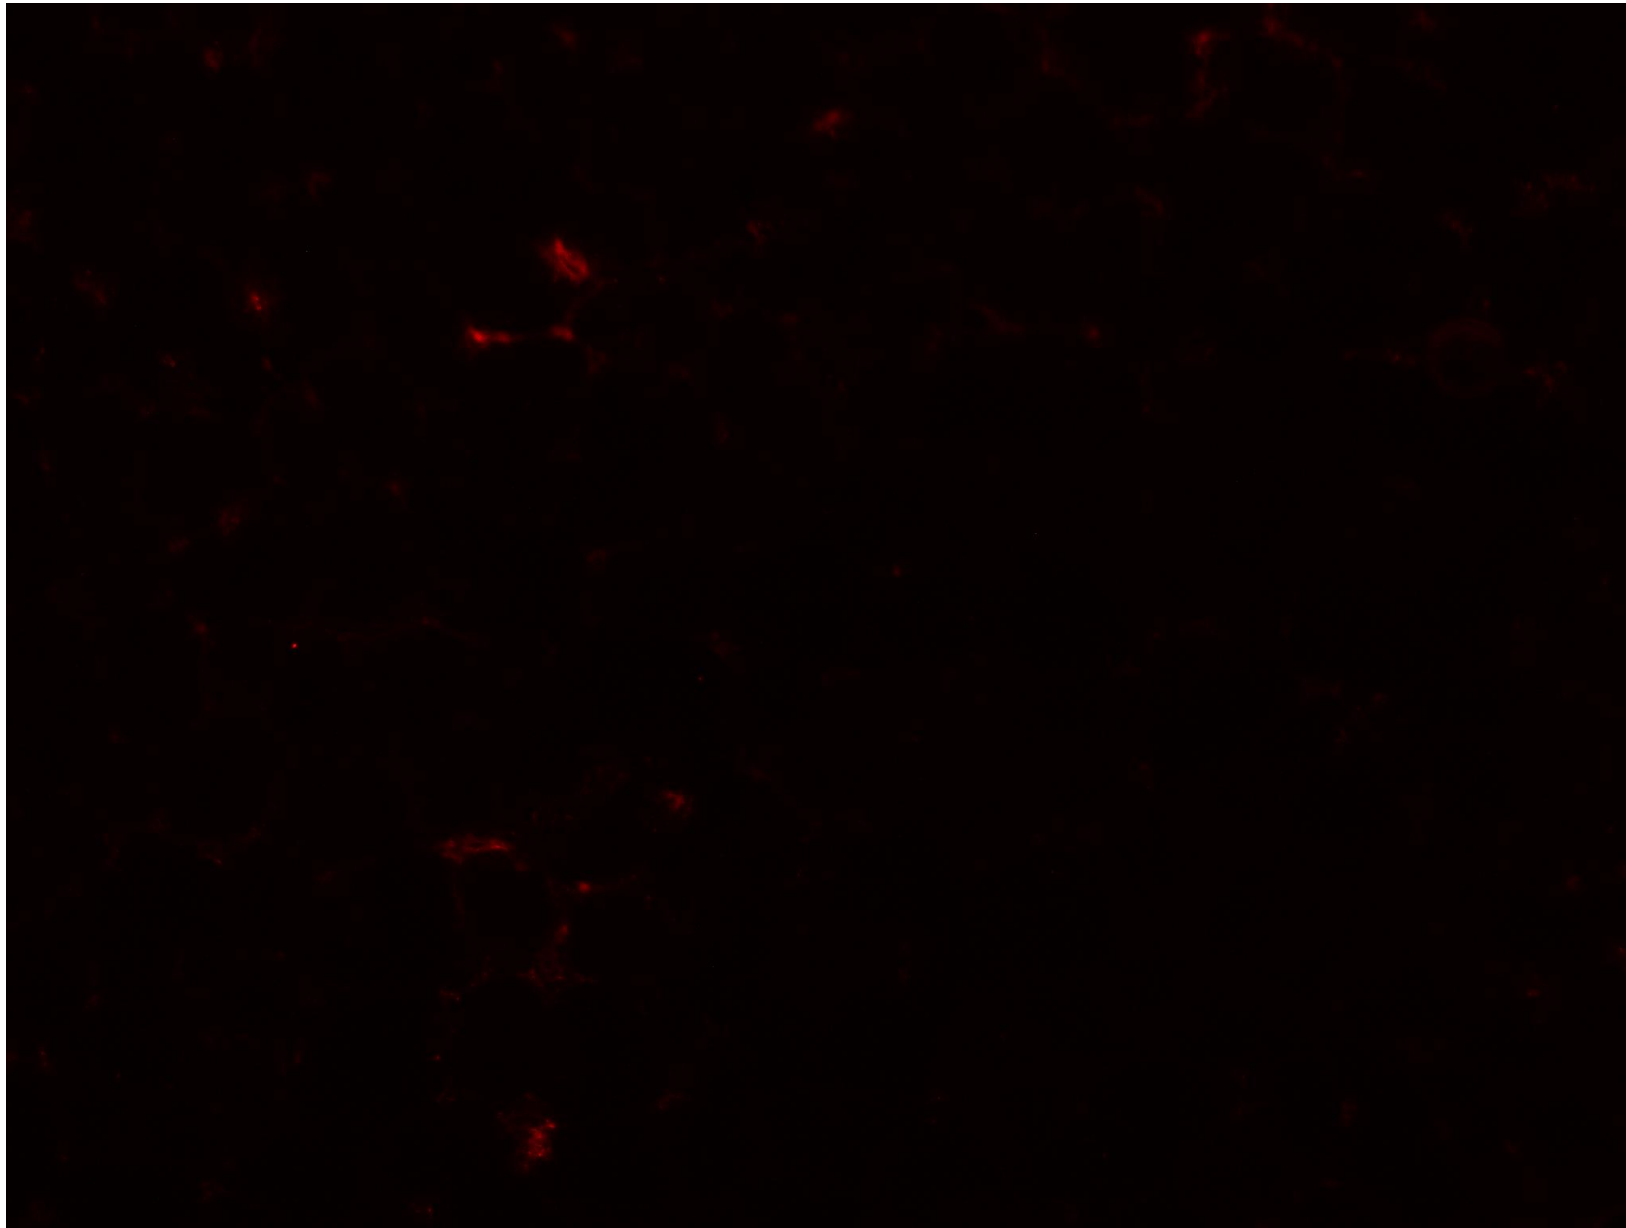

Figure 4B – Upper row

CTx d0 – Ki67

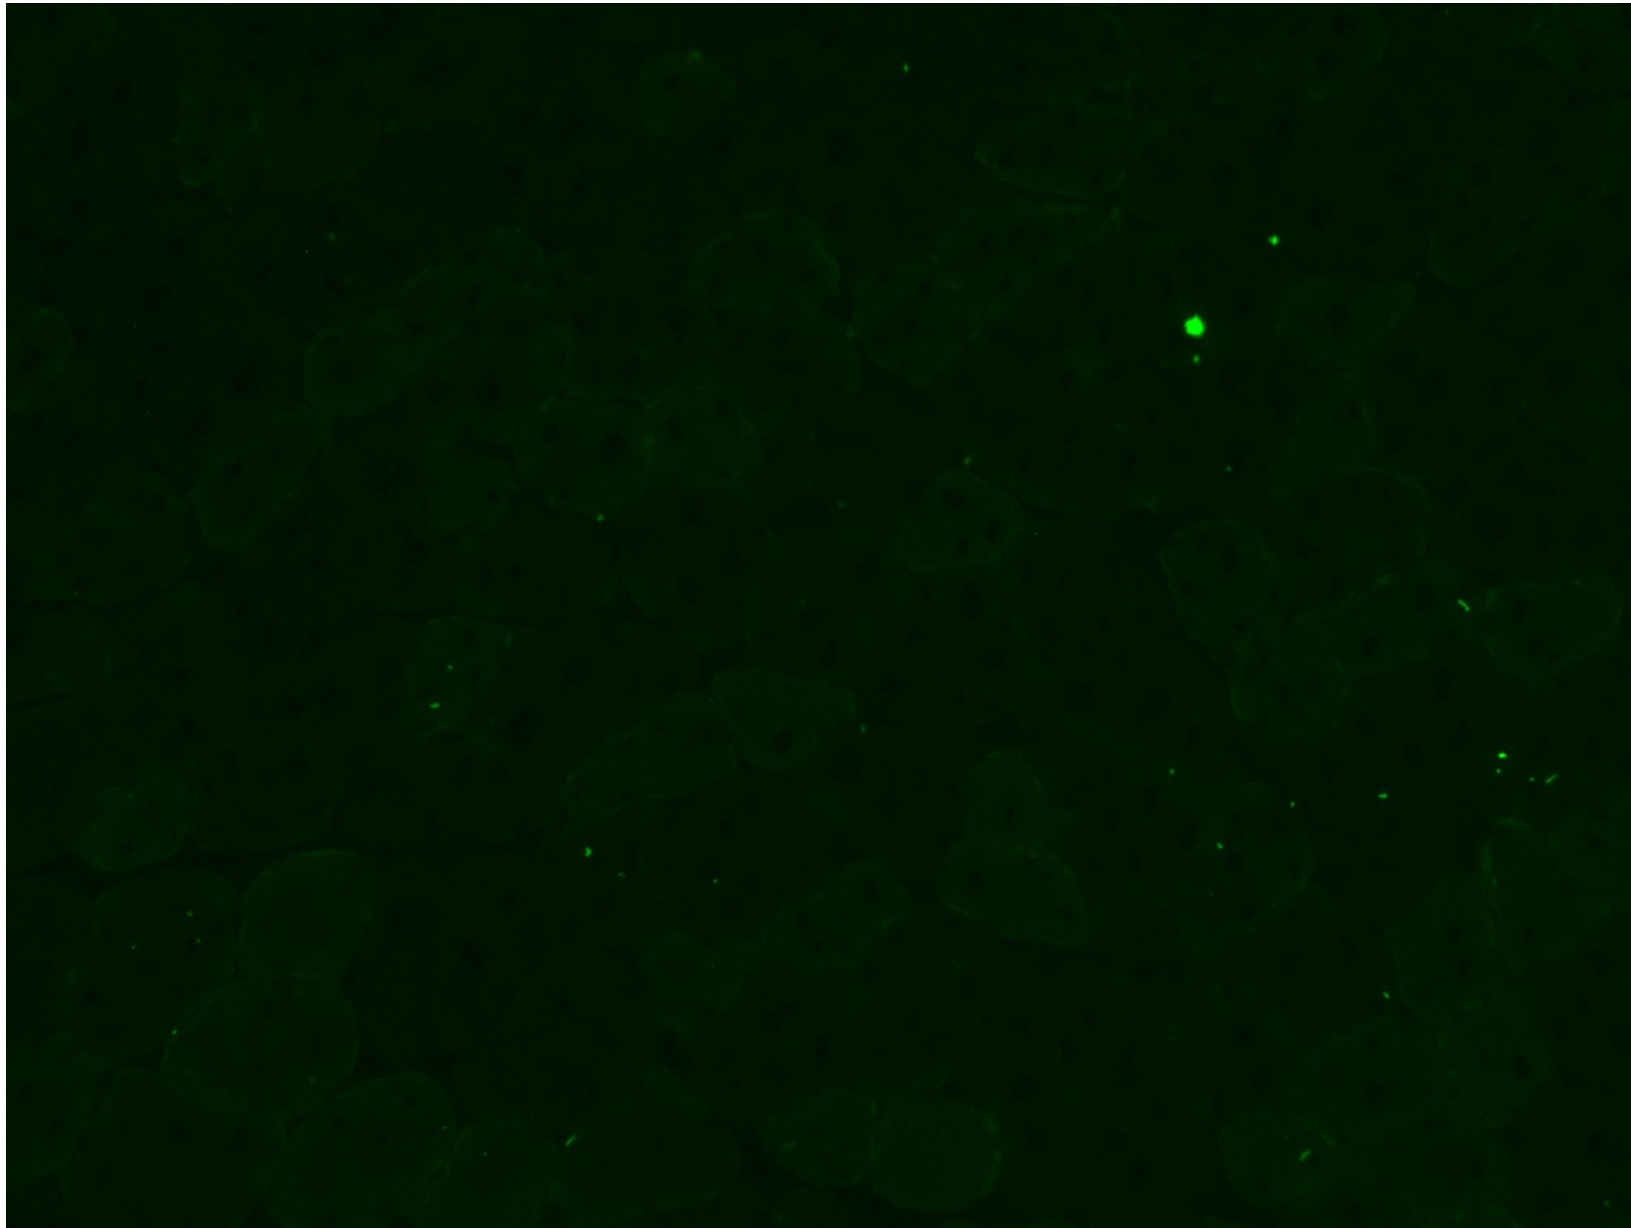

Figure 4B – Upper row

CTx d3 - DAPI

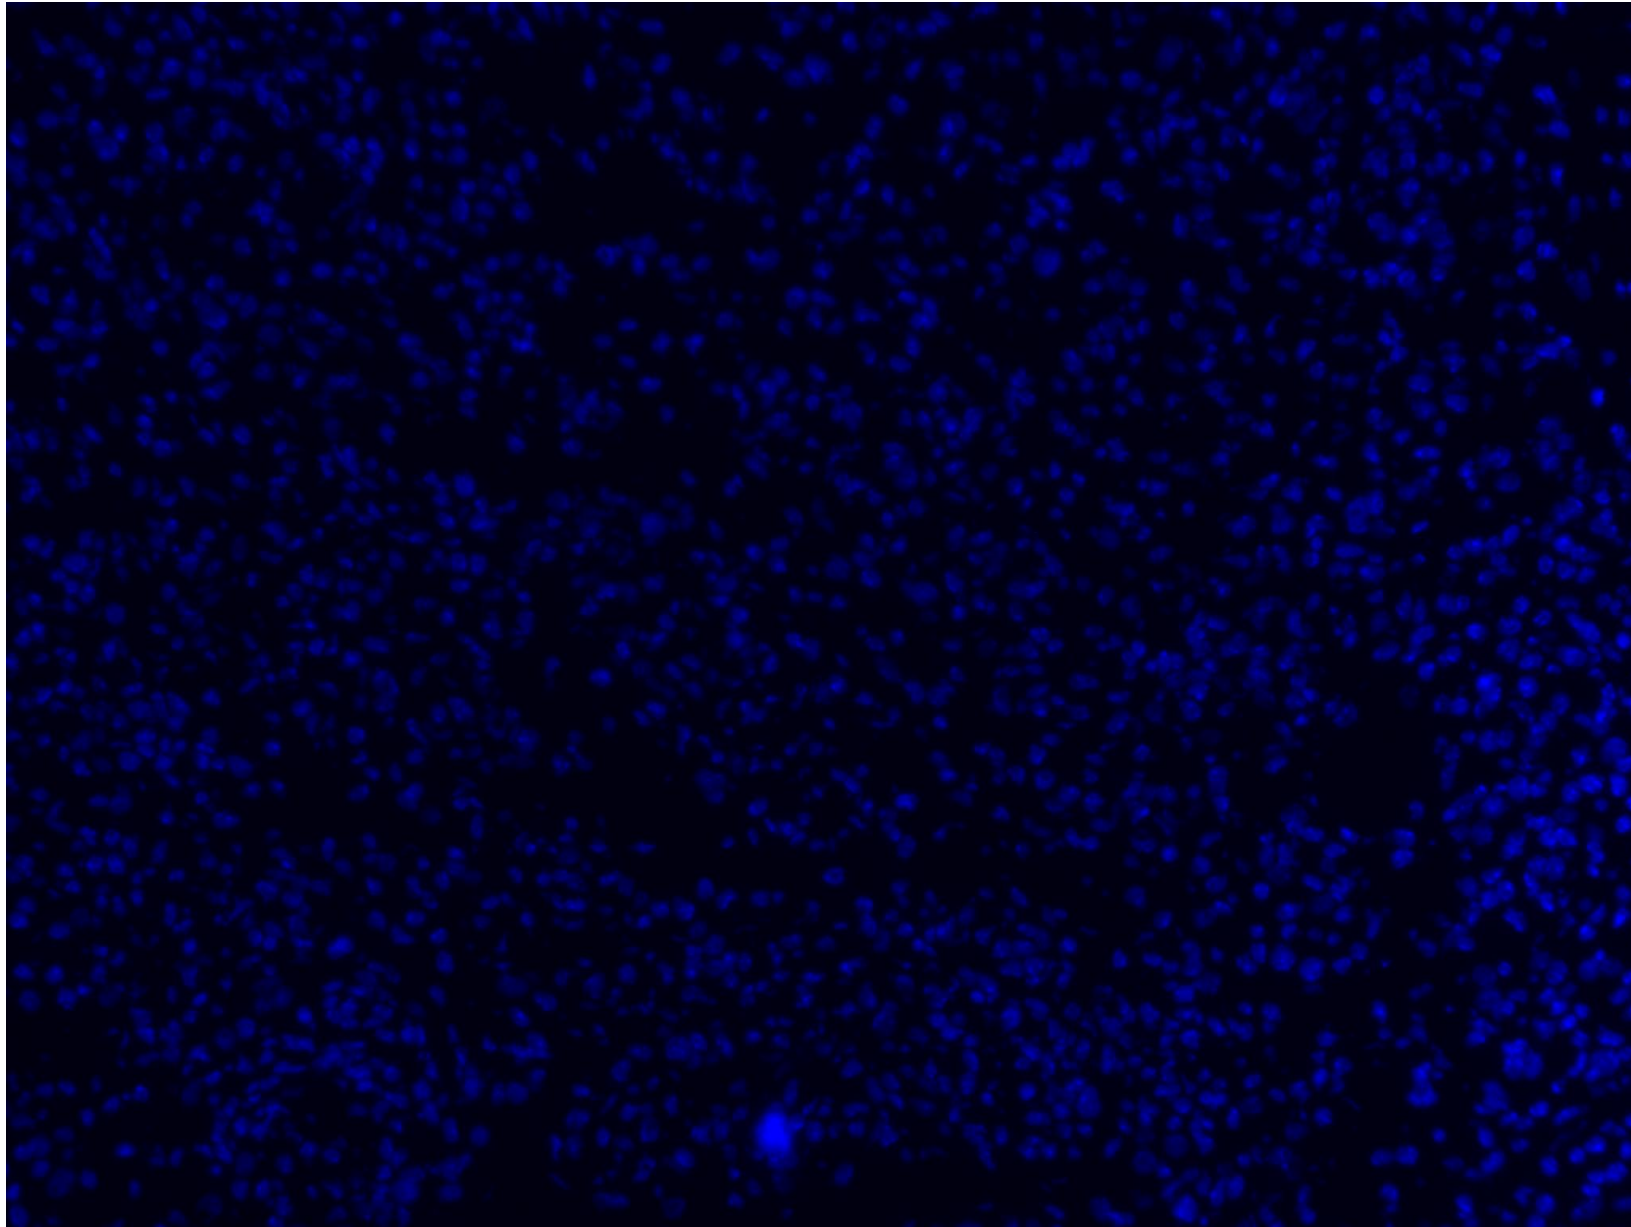

Figure 4B – Upper row

CTx d3 – Ly6C

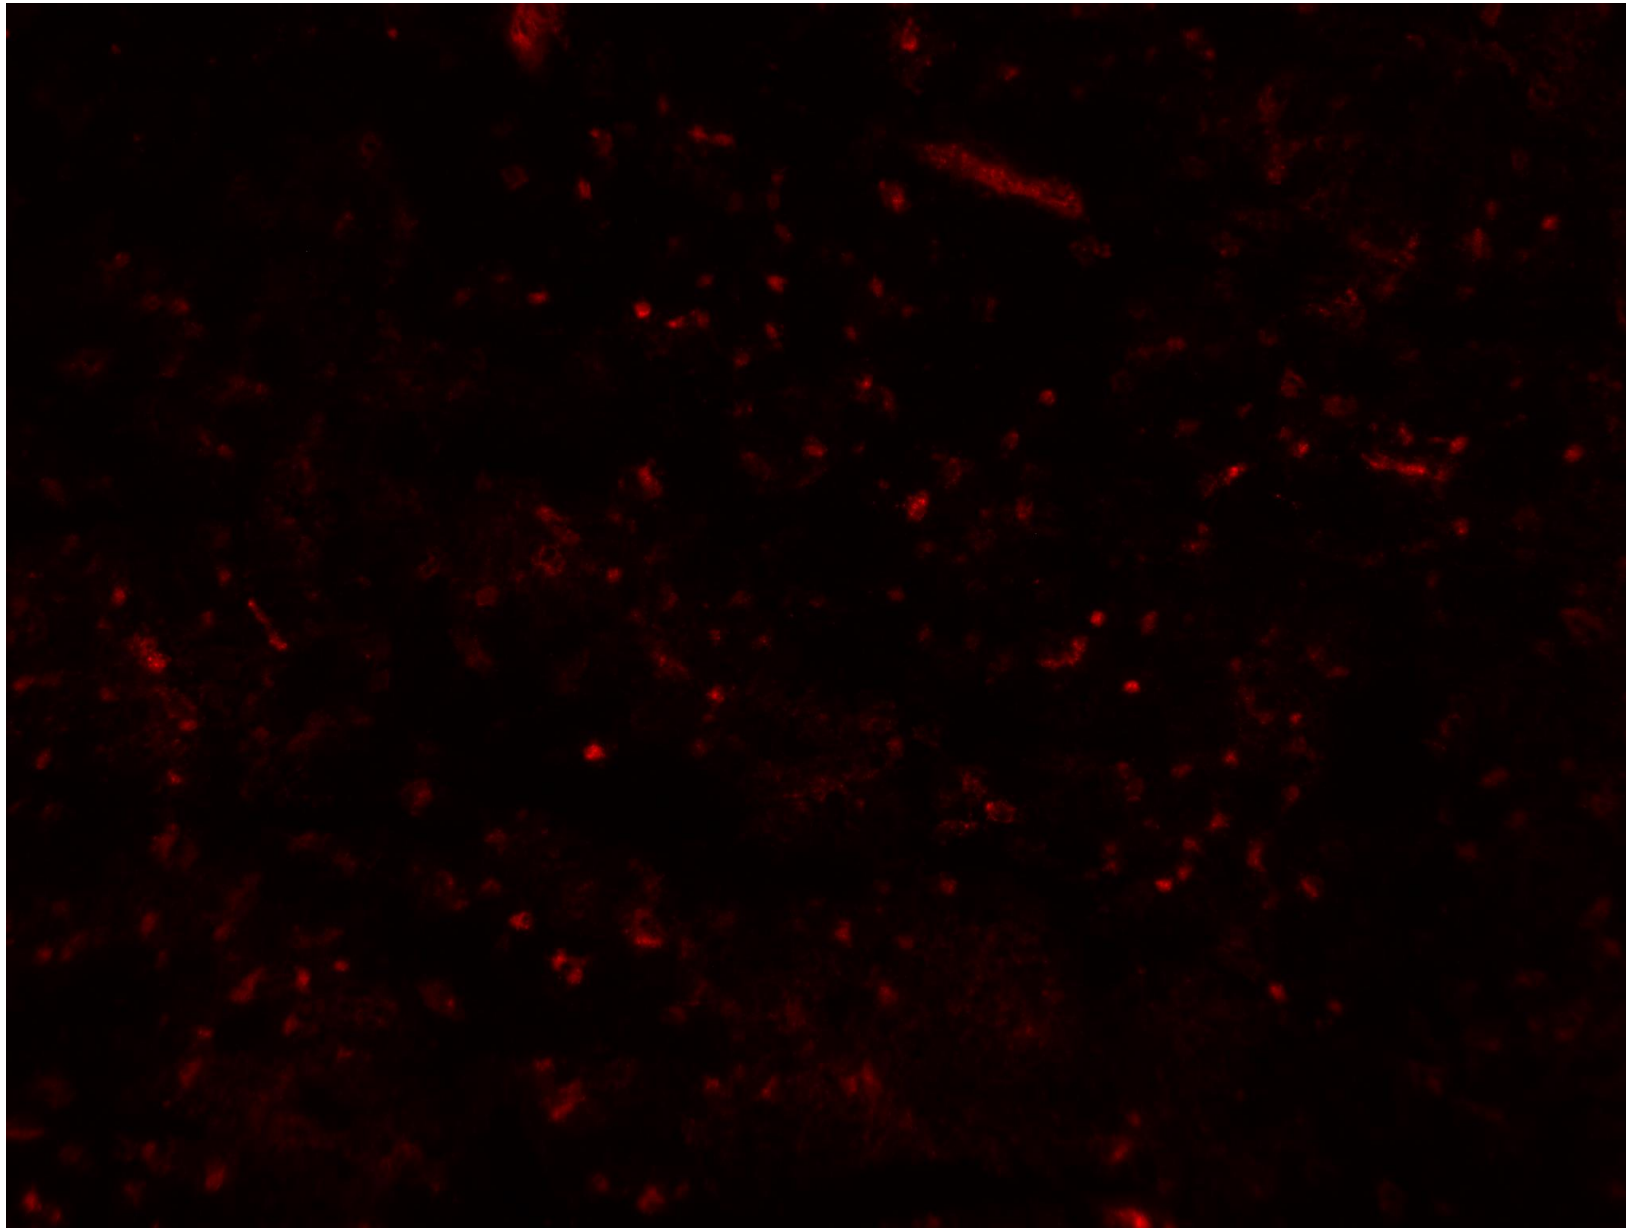

Figure 4B – Upper row

CTx d3 – Ki67

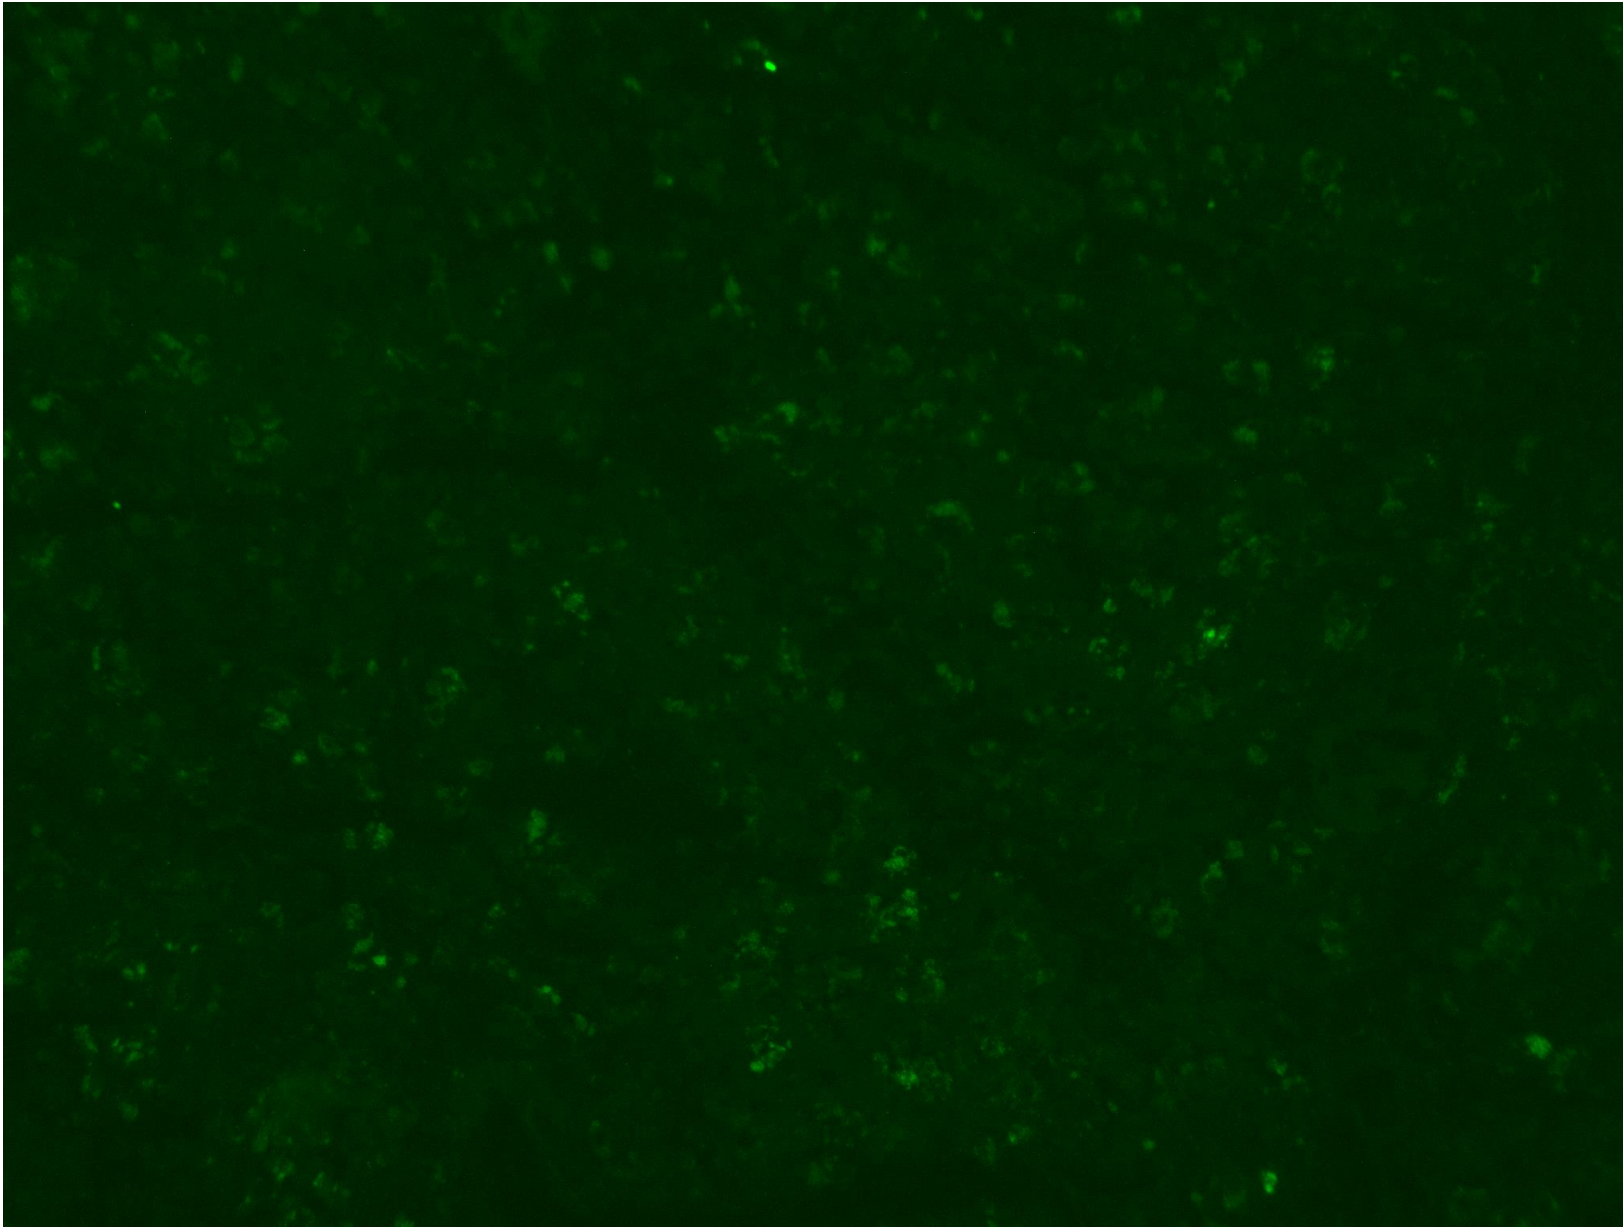

Figure 4B – Upper row

CTx d4 - DAPI

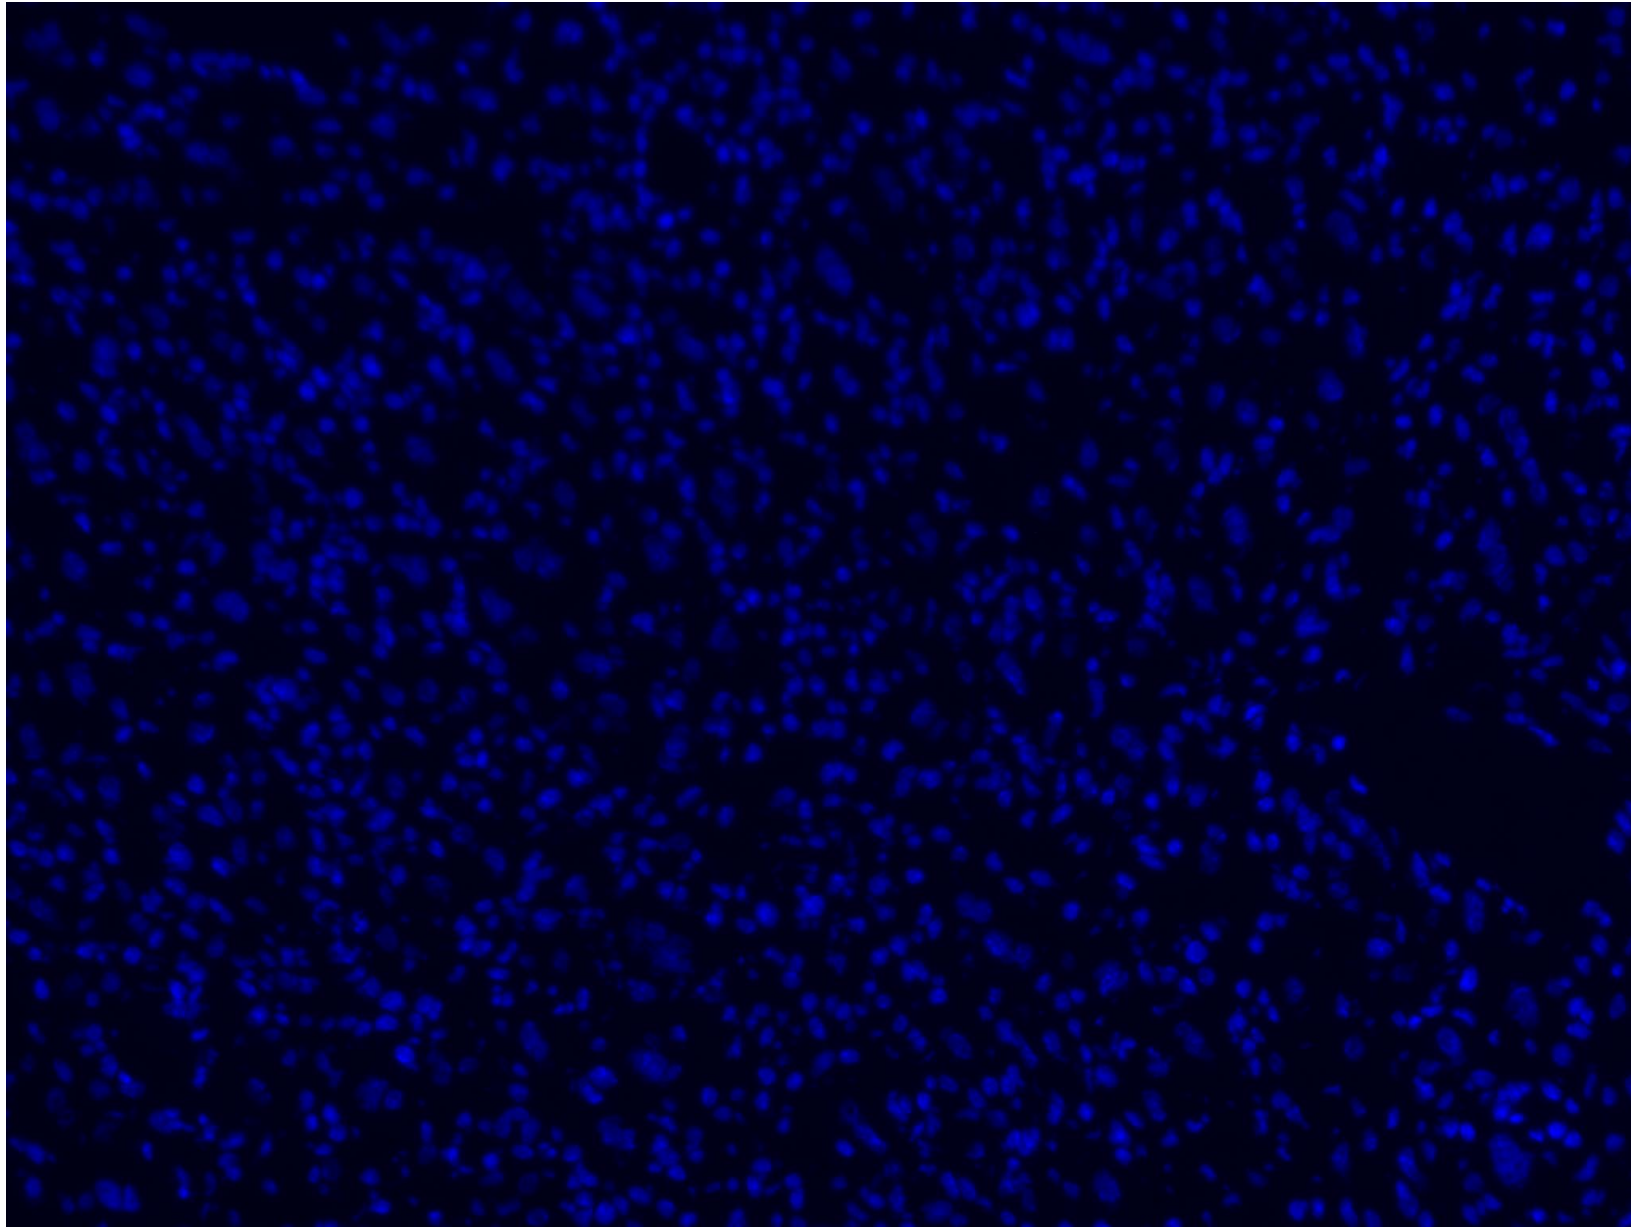

Figure 4B – Upper row

CTx d4 – Ly6C

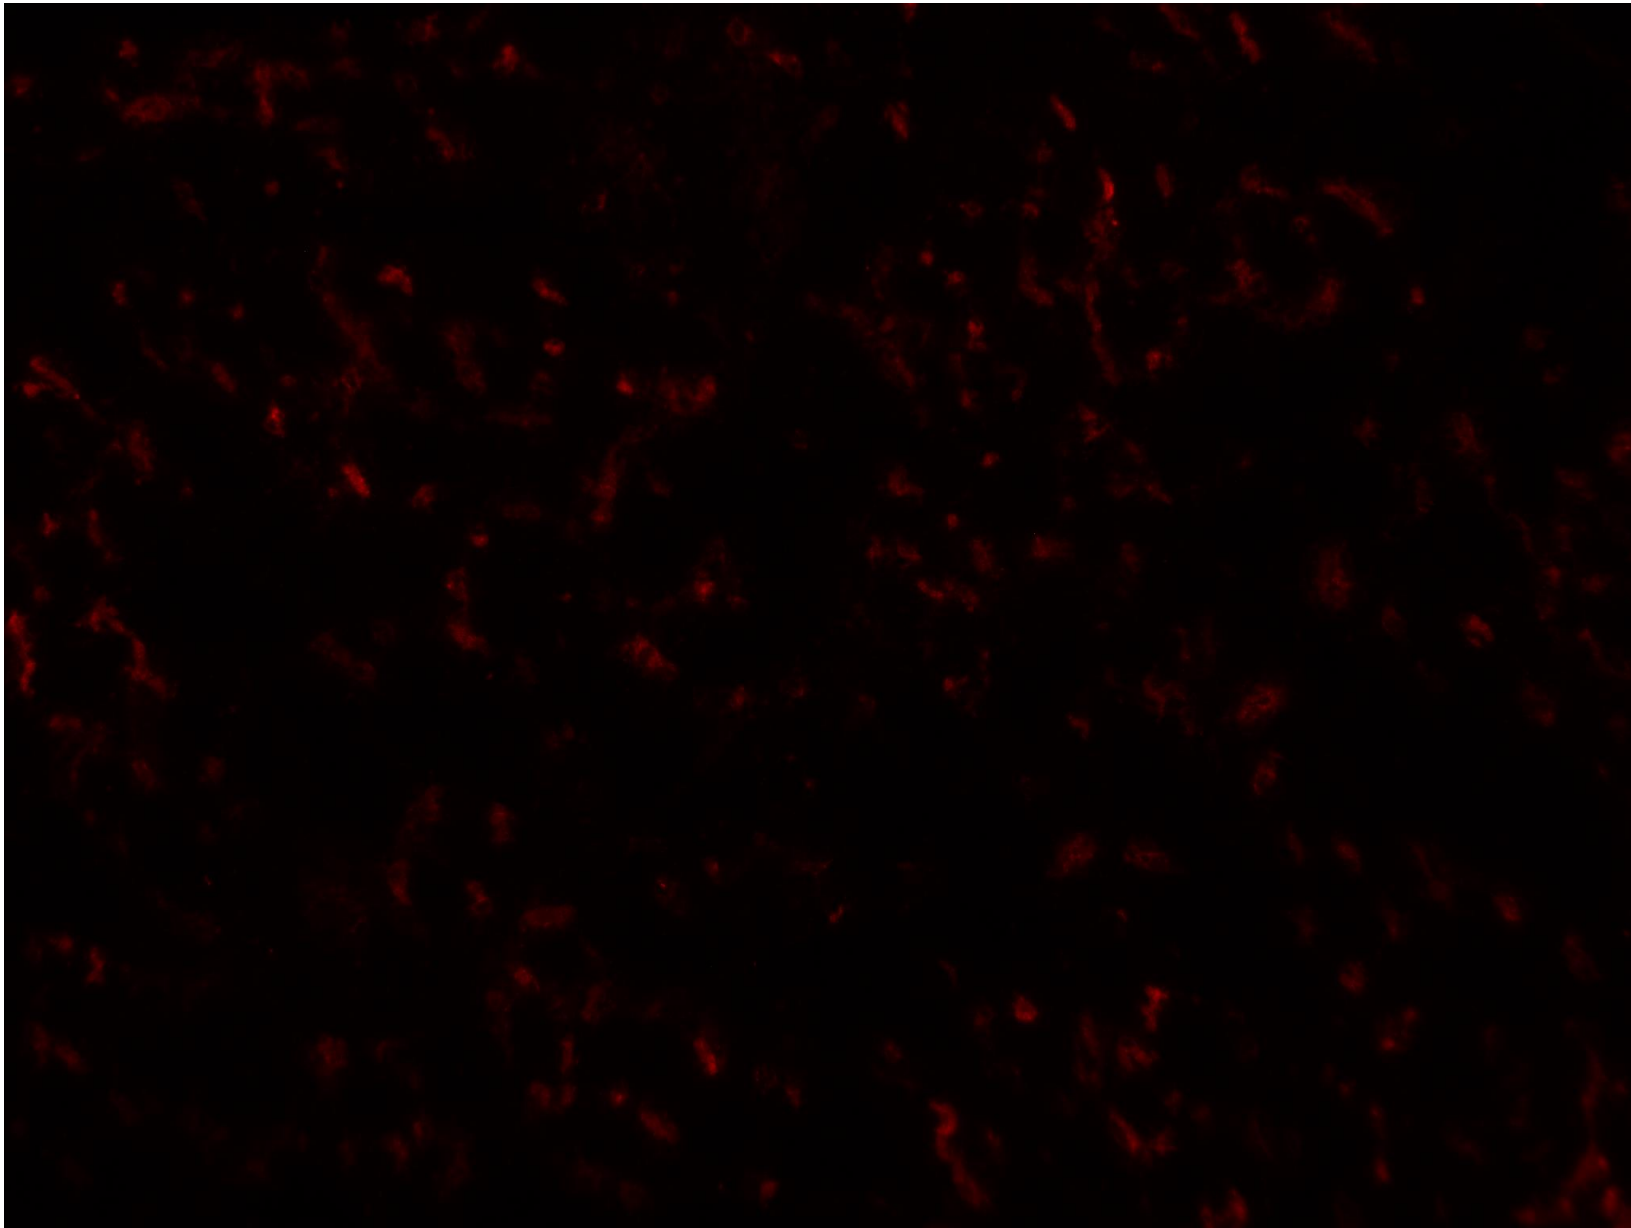

Figure 4B – Upper row

CTx d4 – Ki67

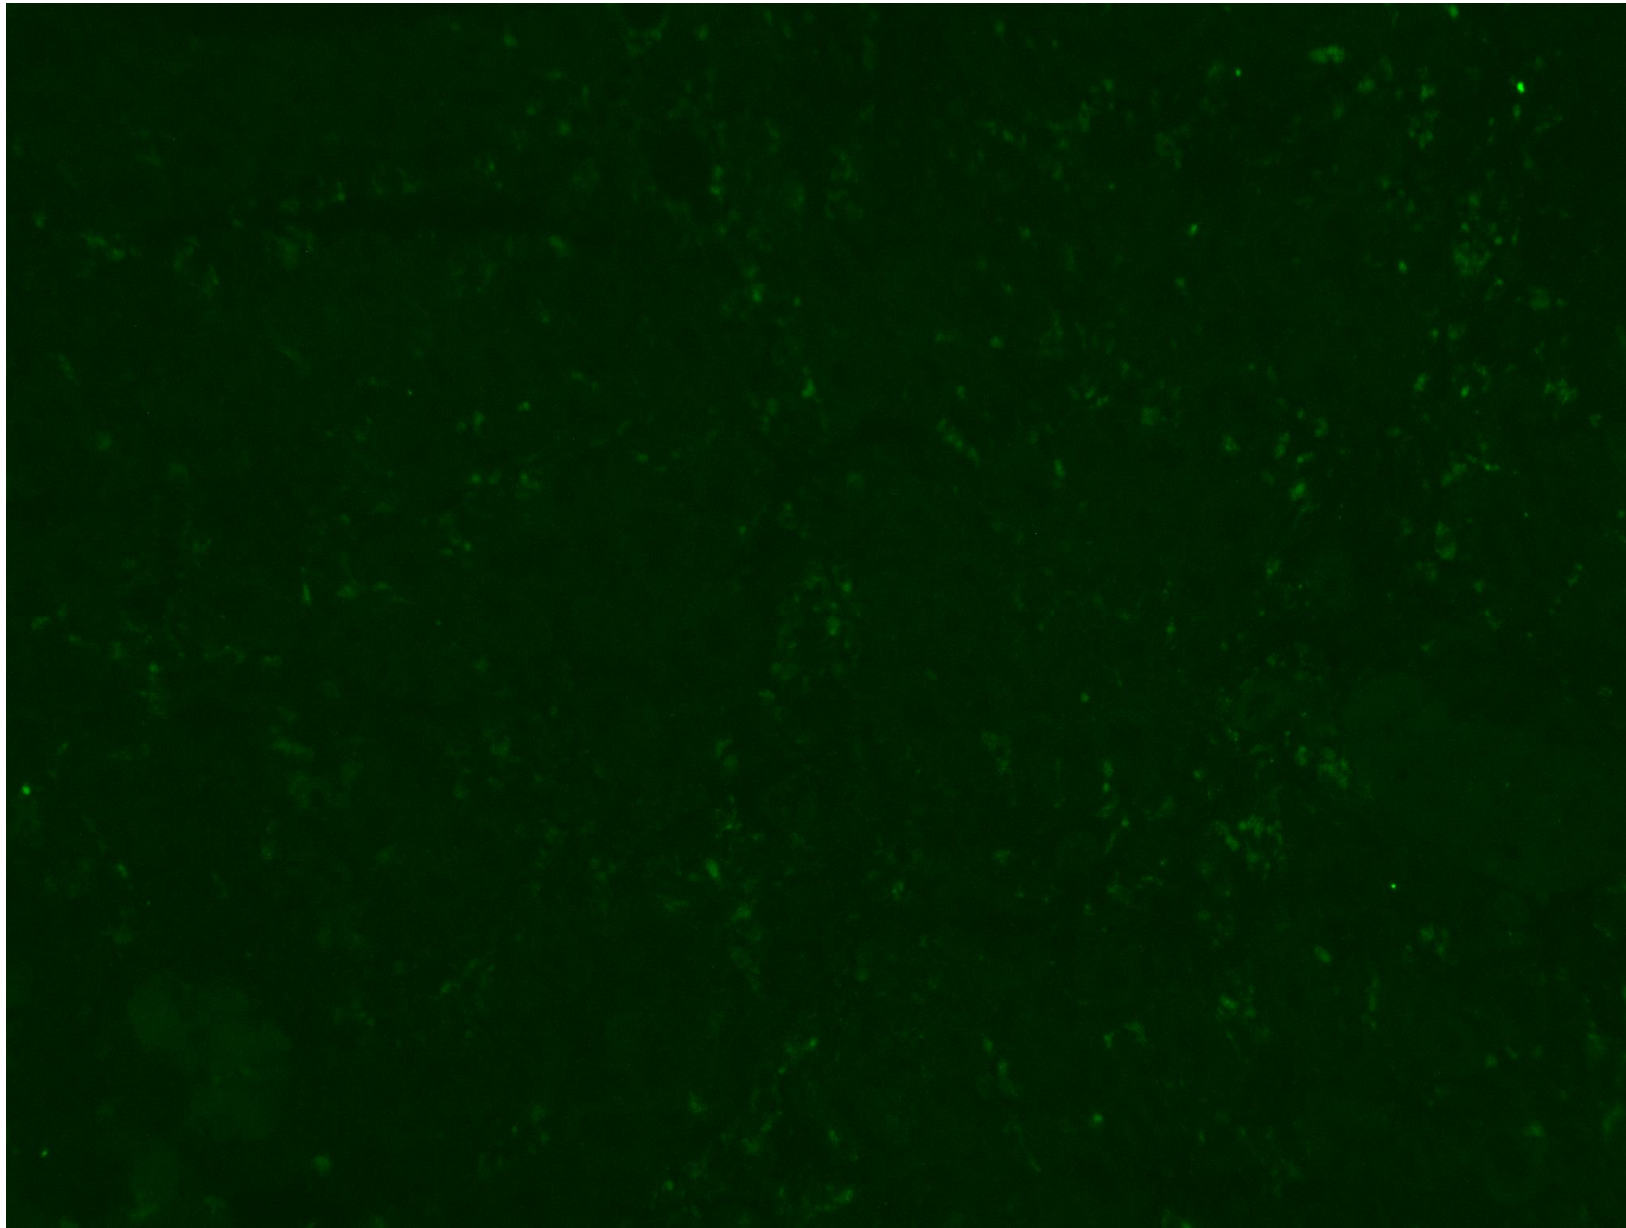

Figure 4B – Upper row

CTx d5 - DAPI

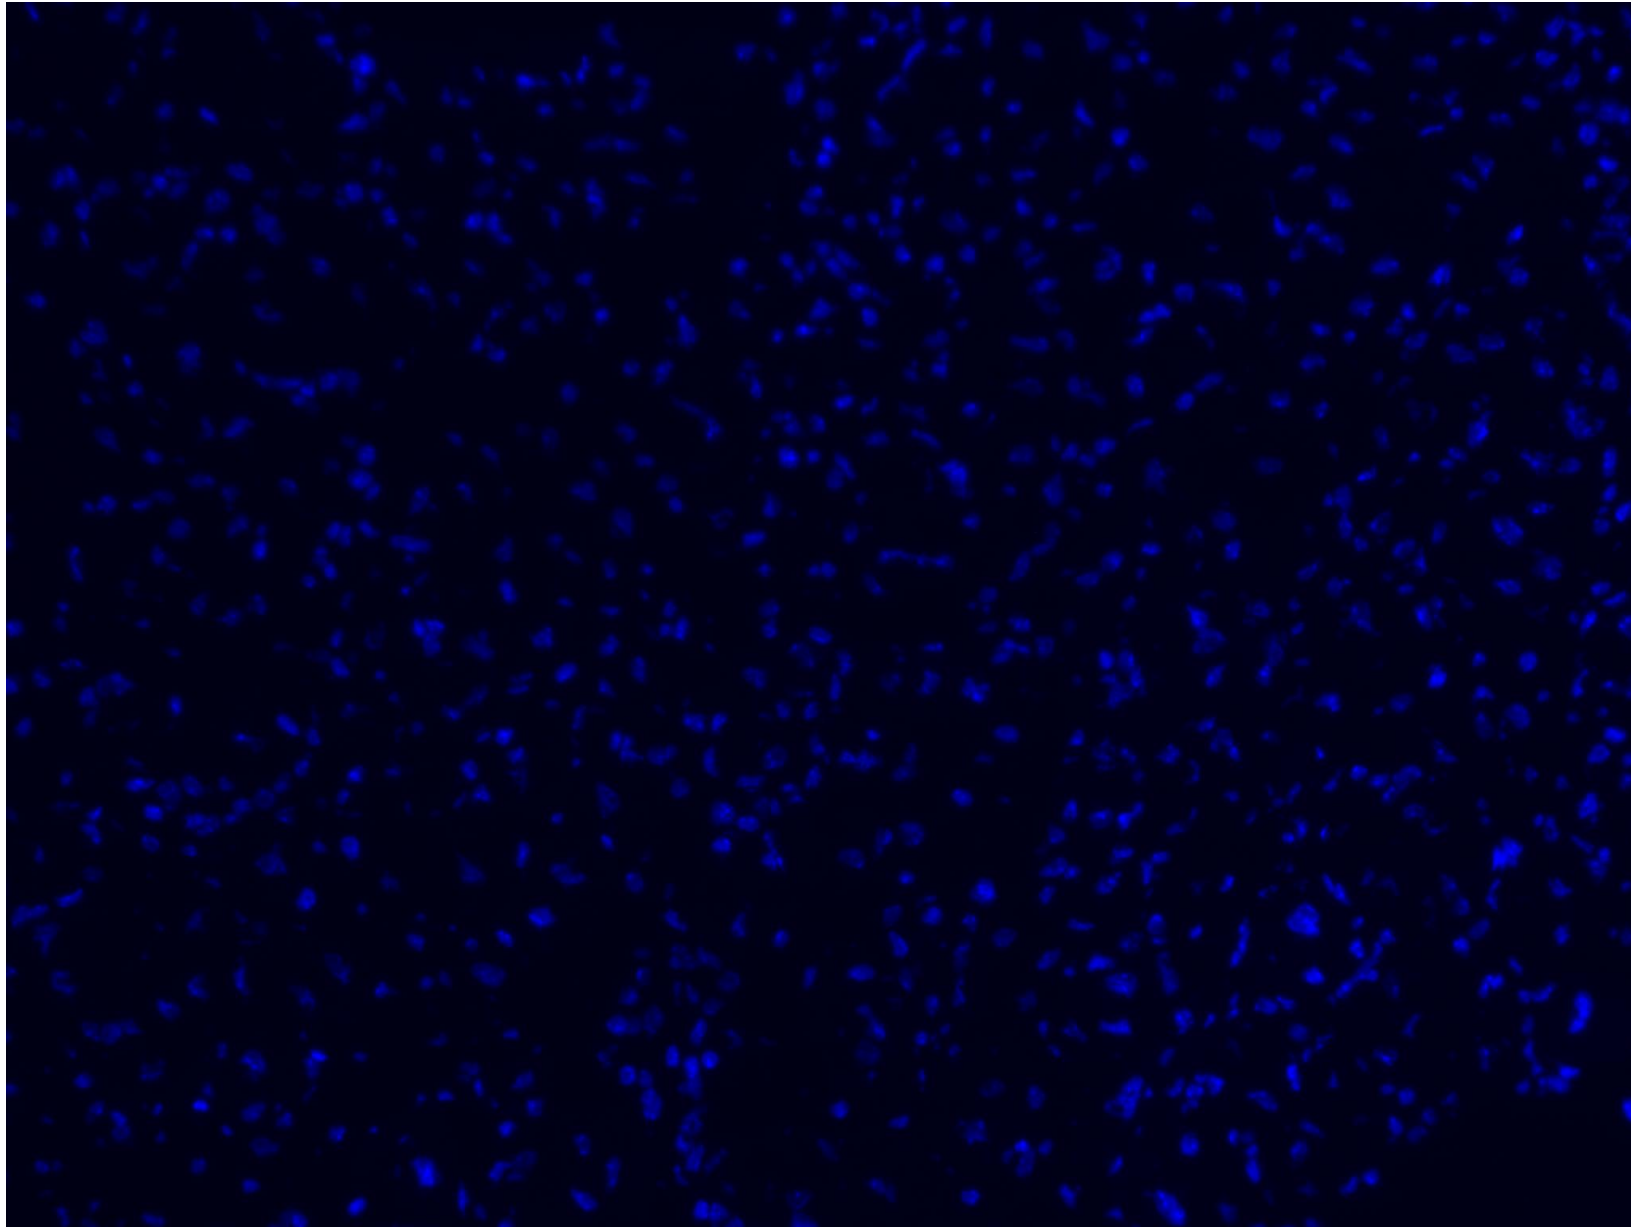

Figure 4B – Upper row

CTx d5 – Ly6C

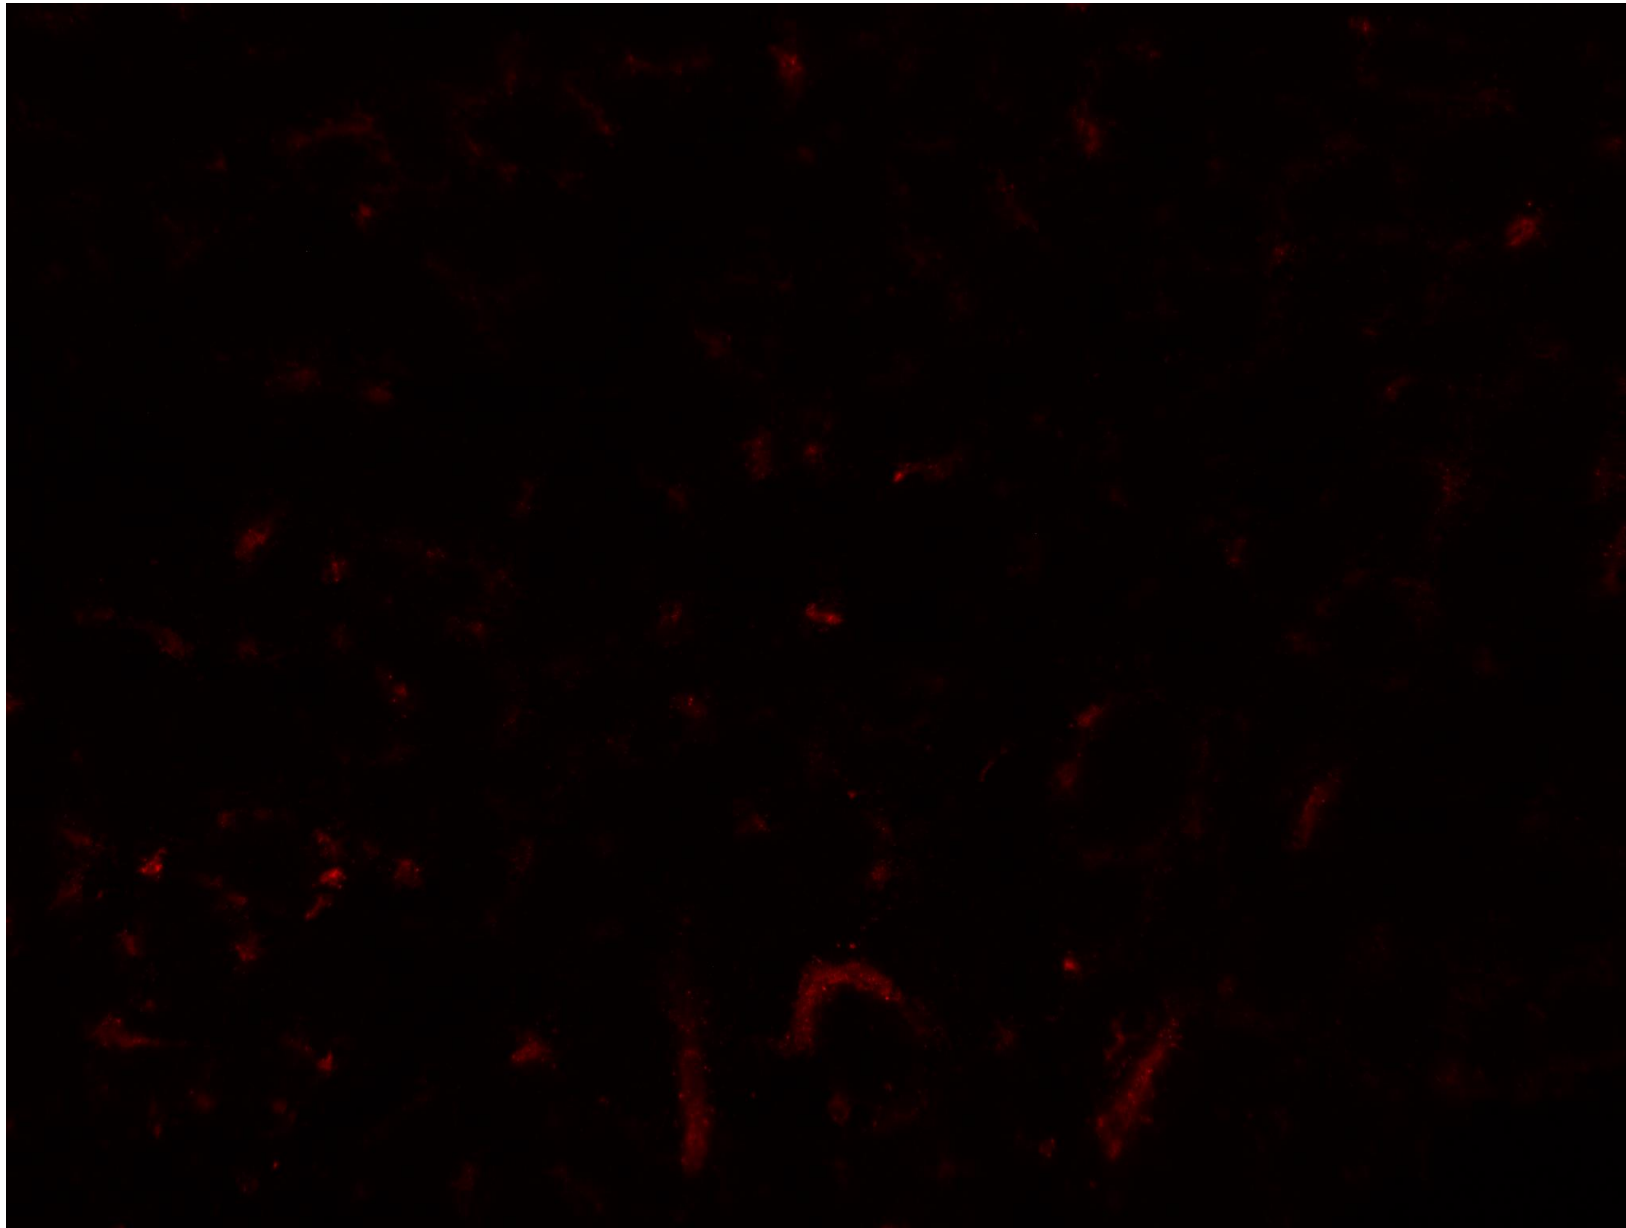

Figure 4B – Upper row

CTx d5 – Ki67

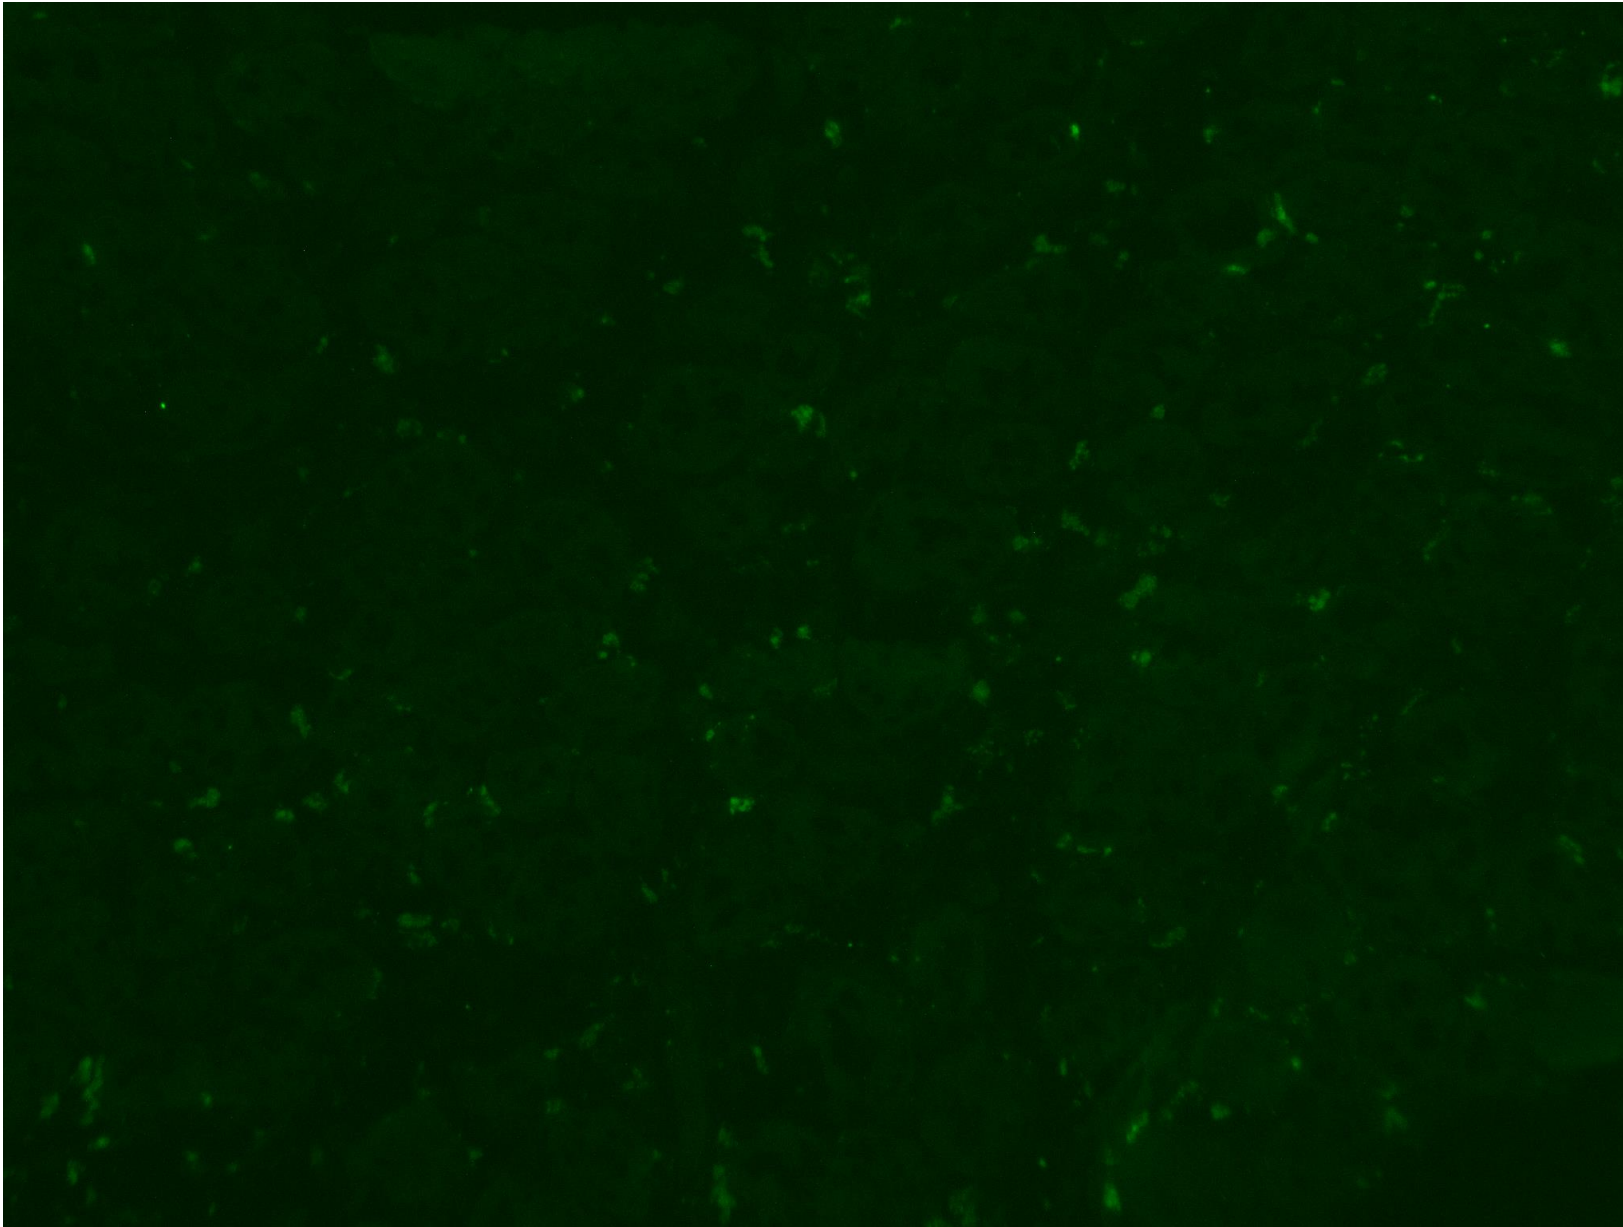

Figure 4B – Middle row

CTx d0 - DAPI

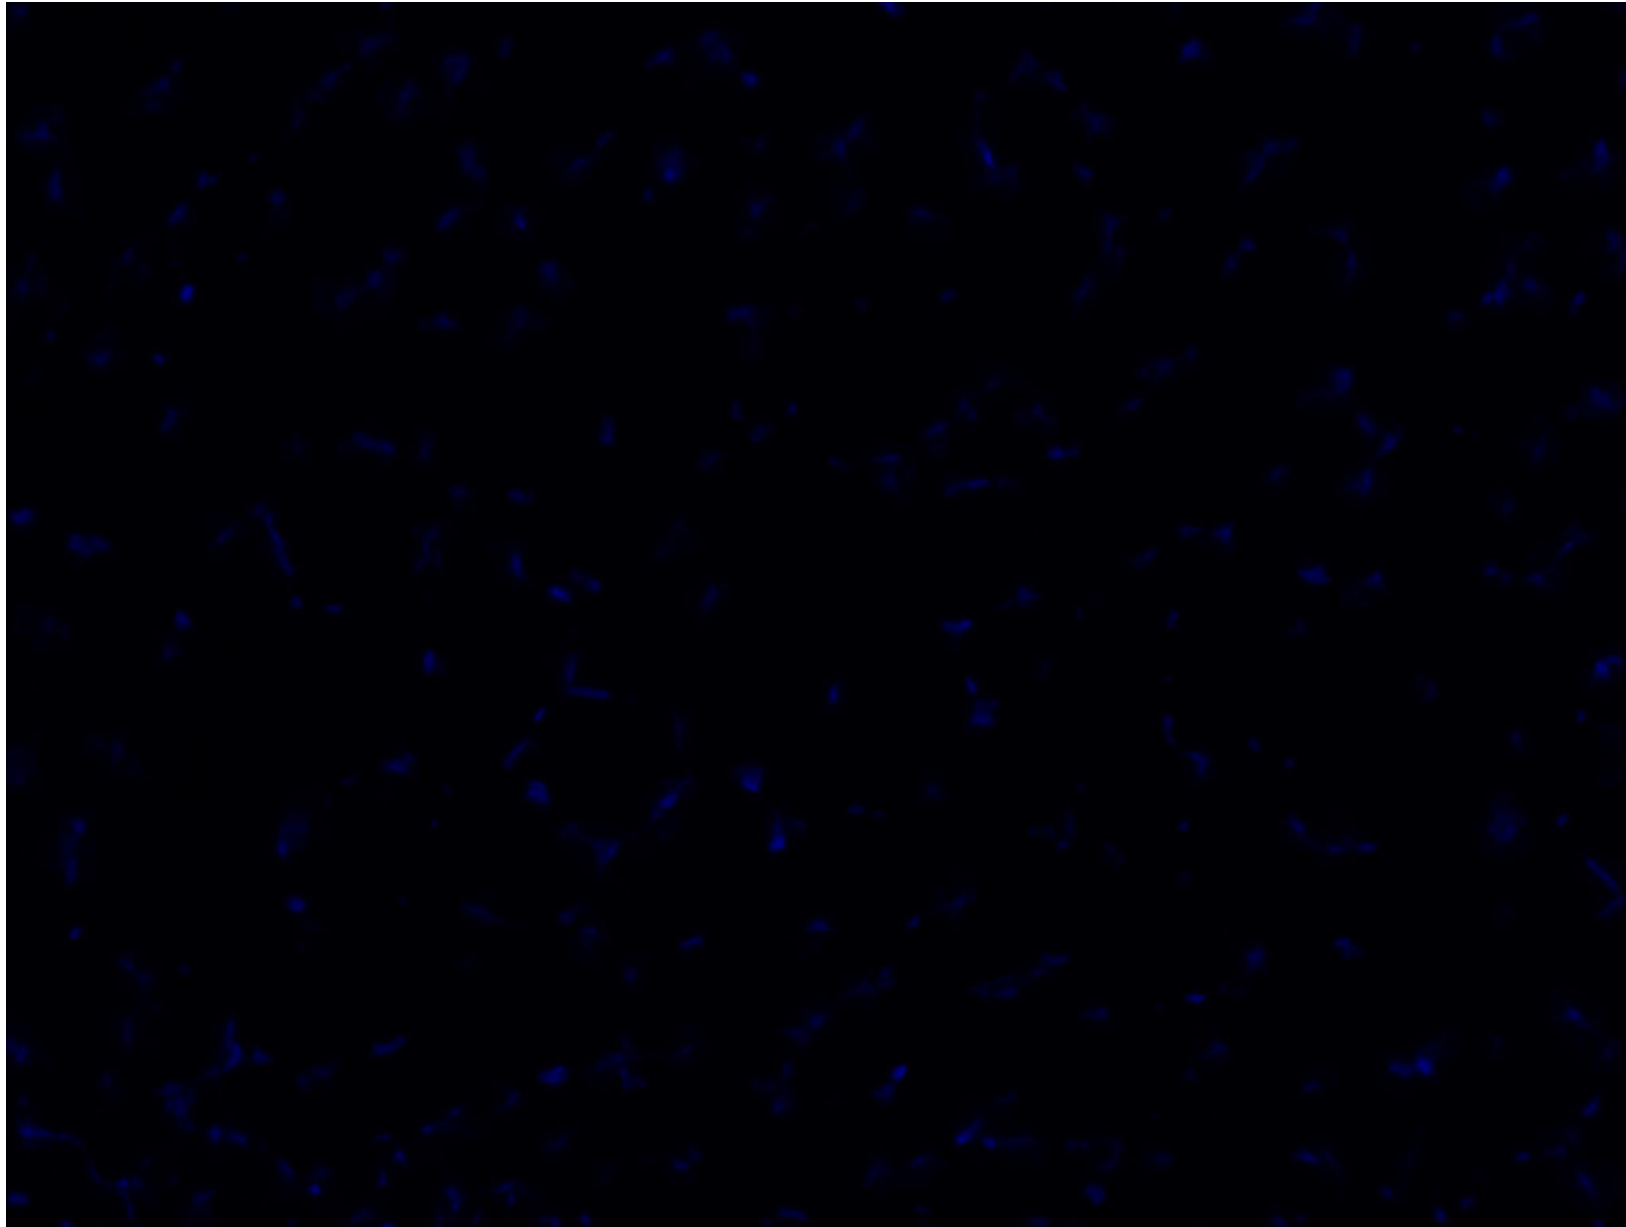

Figure 4B – Middle row

CTx d0 – IL-7R

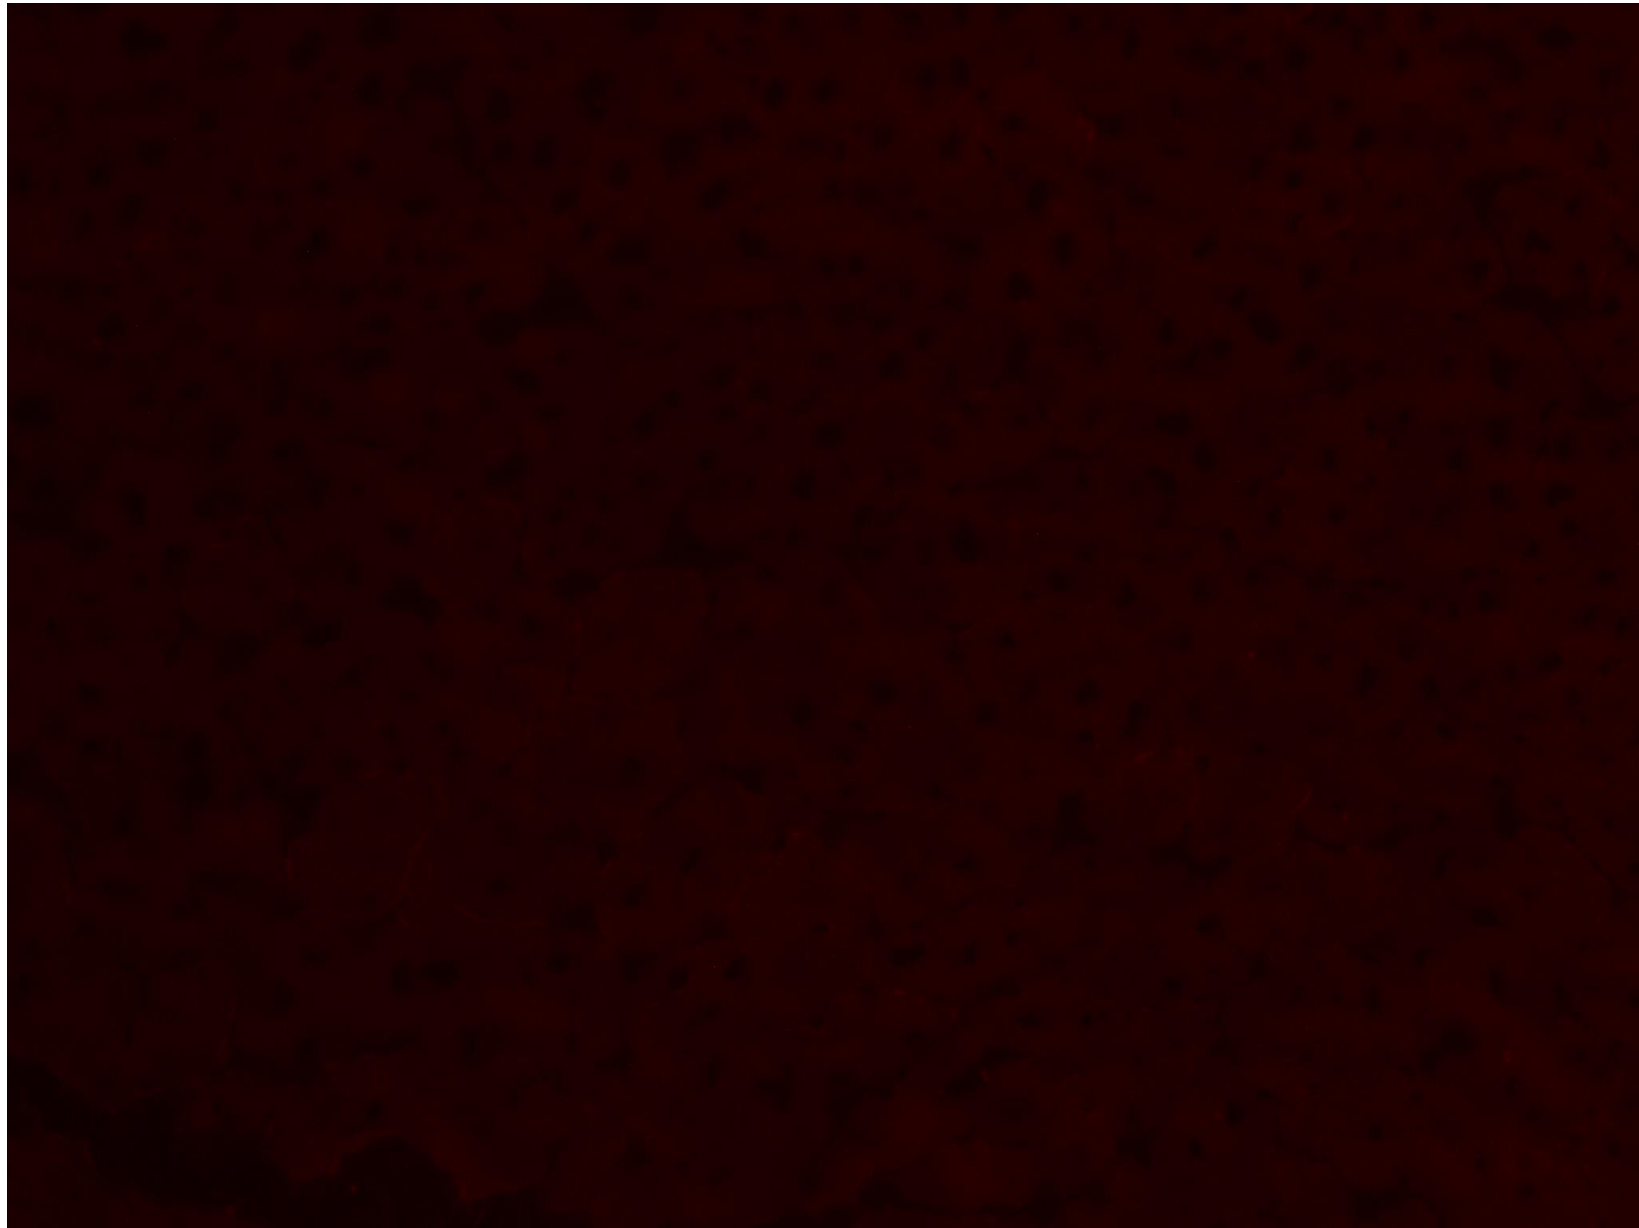

Figure 4B – Middle row

CTx d0 – Ki67

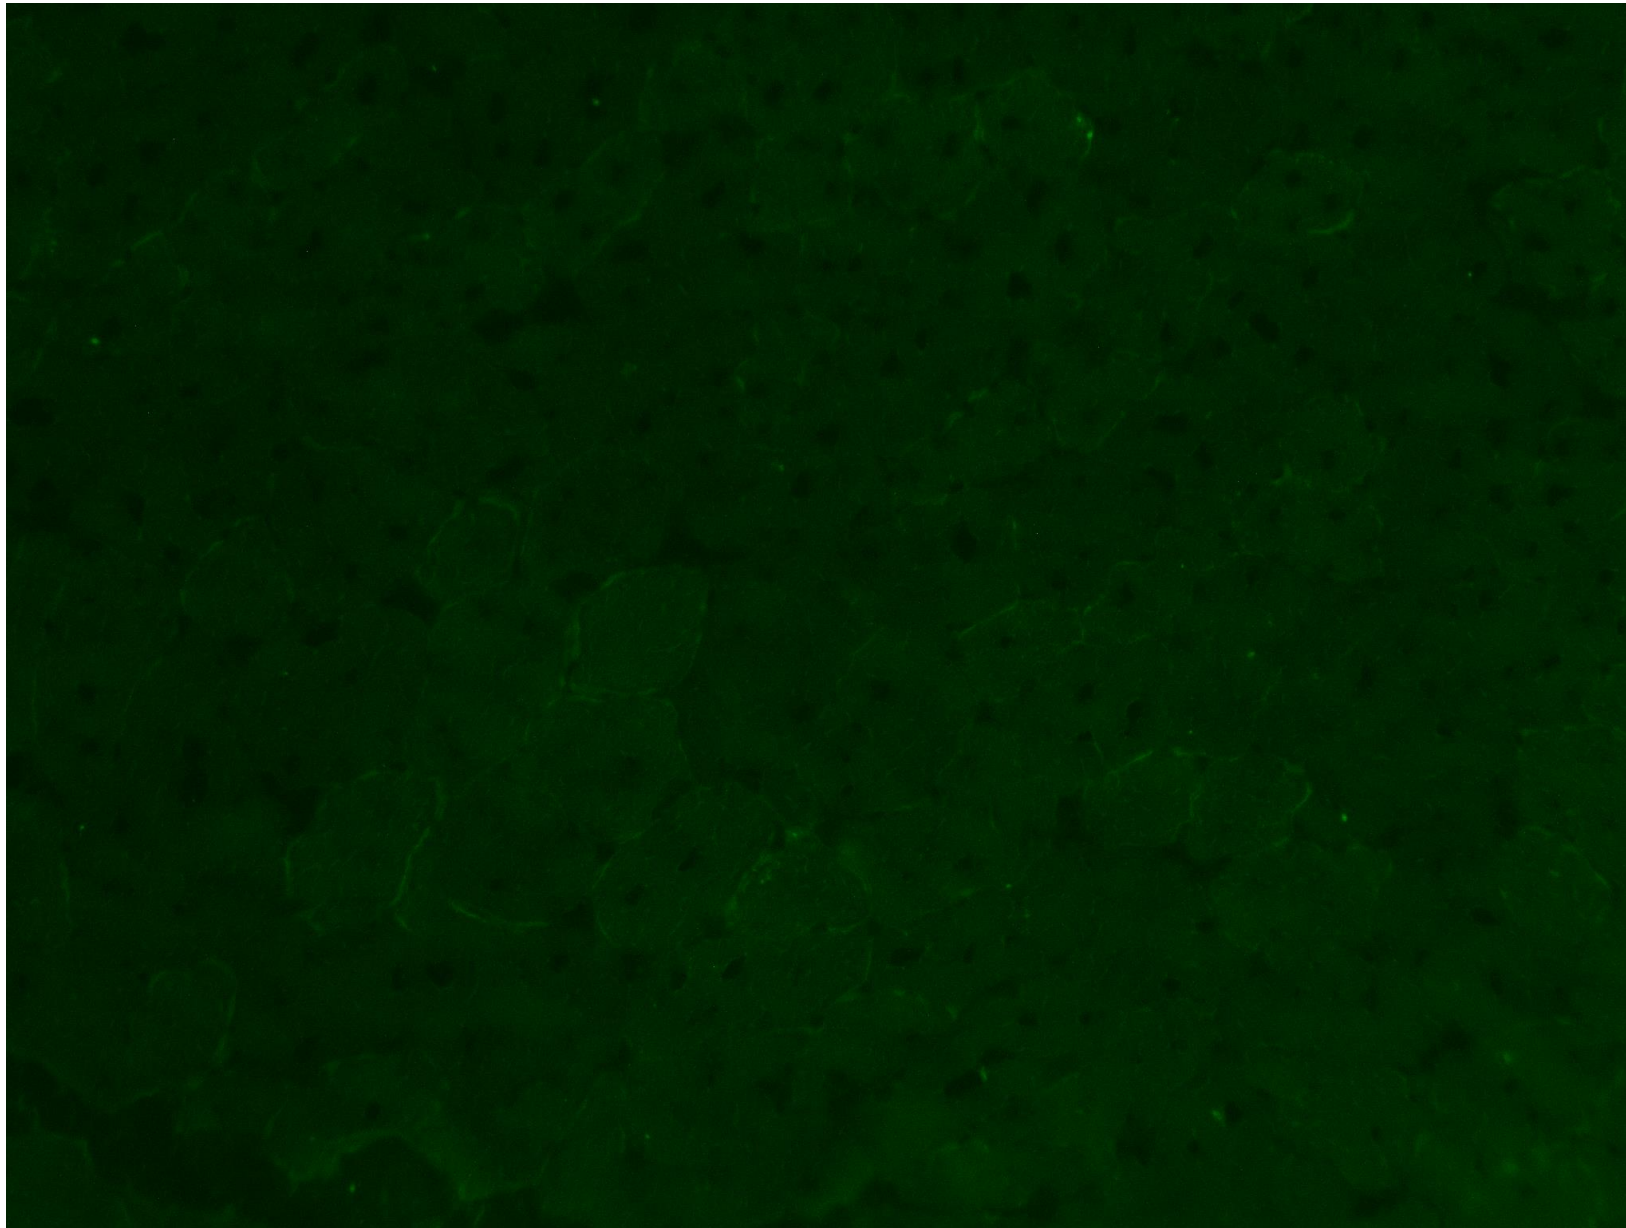

Figure 4B – Middle row

CTx d3 - DAPI

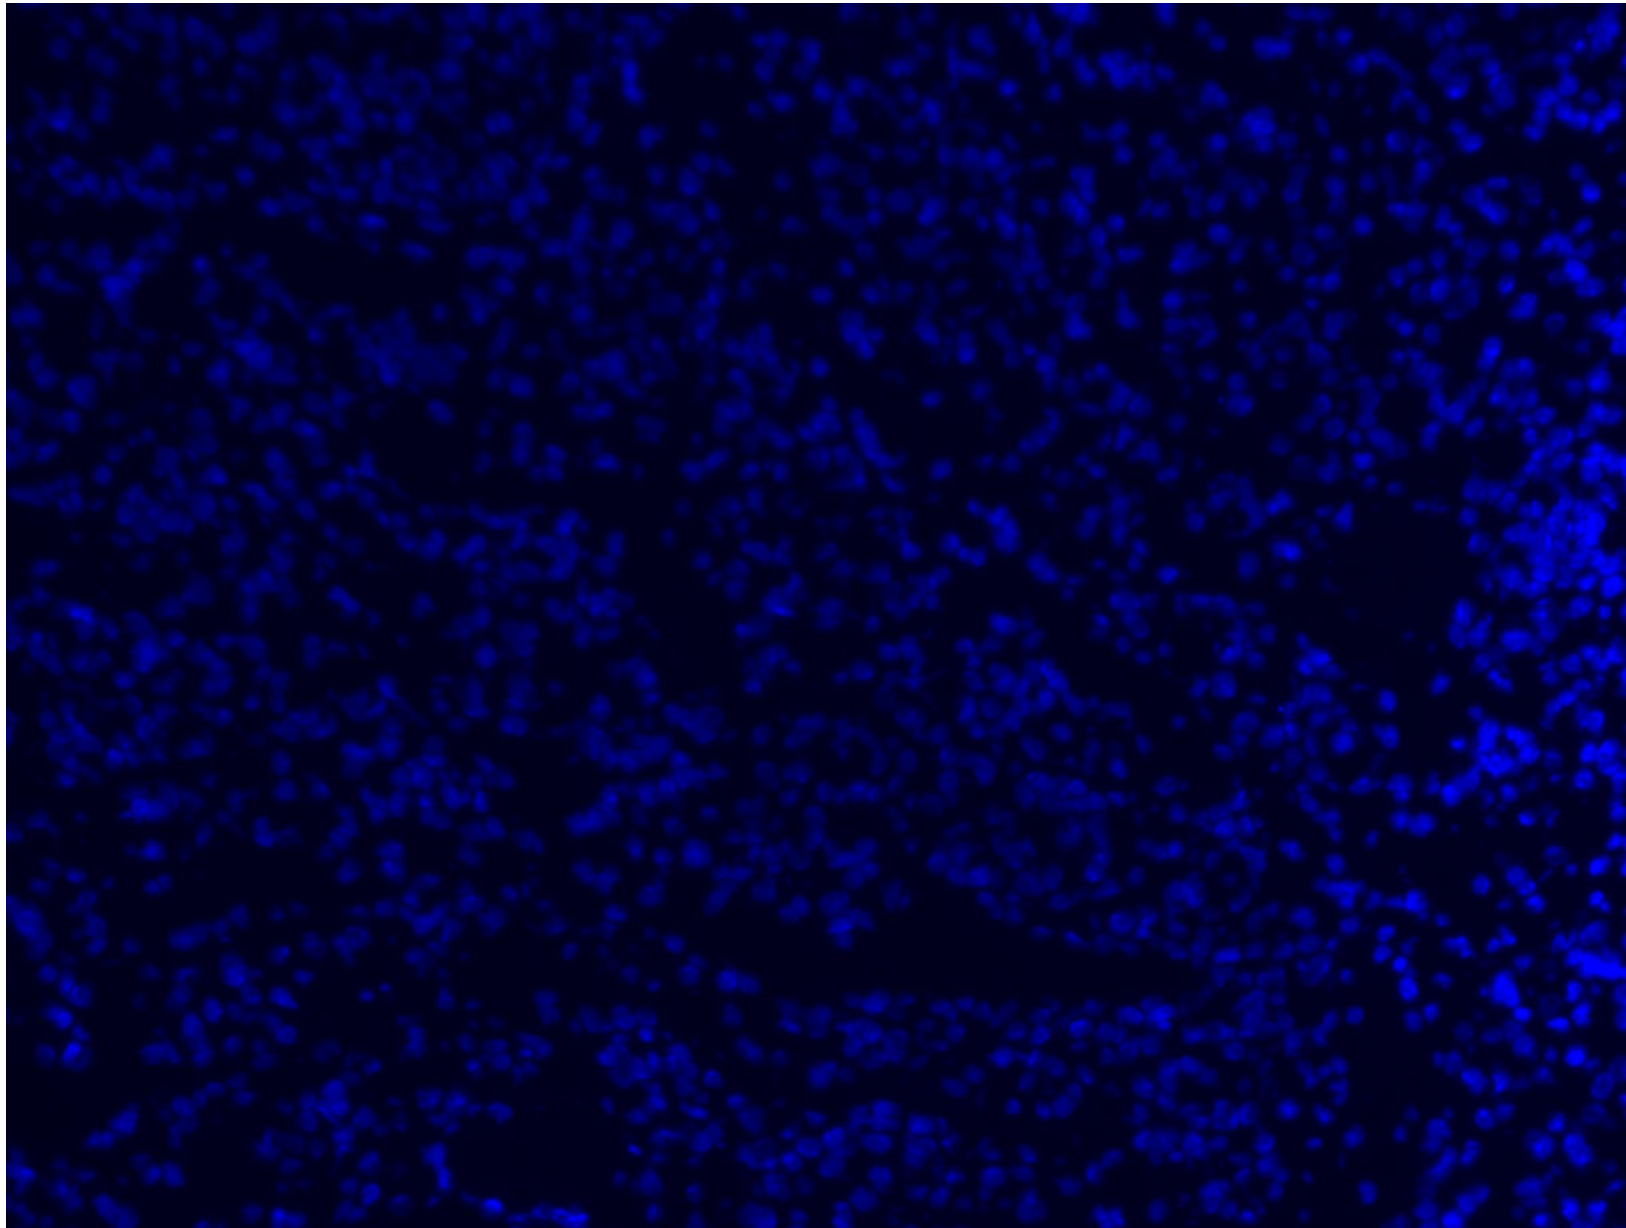

Figure 4B – Middle row

CTx d3 – IL-7R

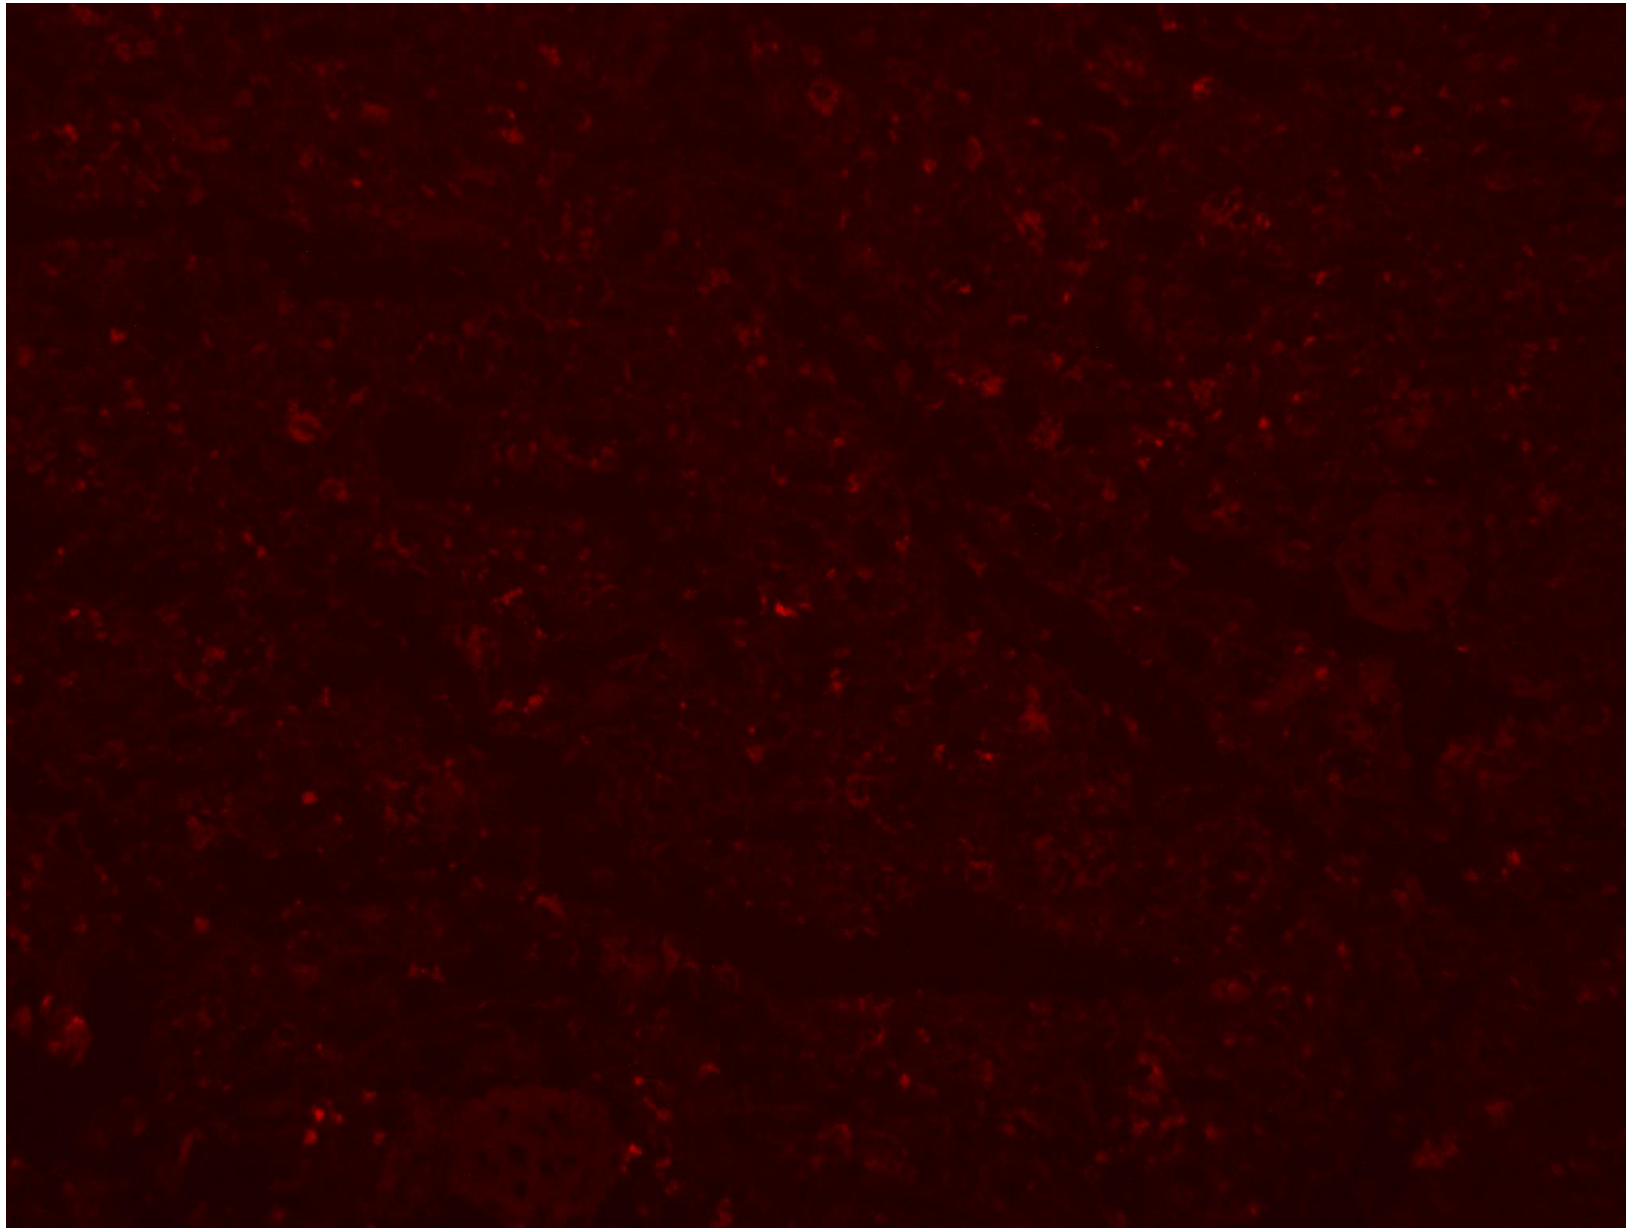

Figure 4B – Middle row

CTx d3 – Ki67

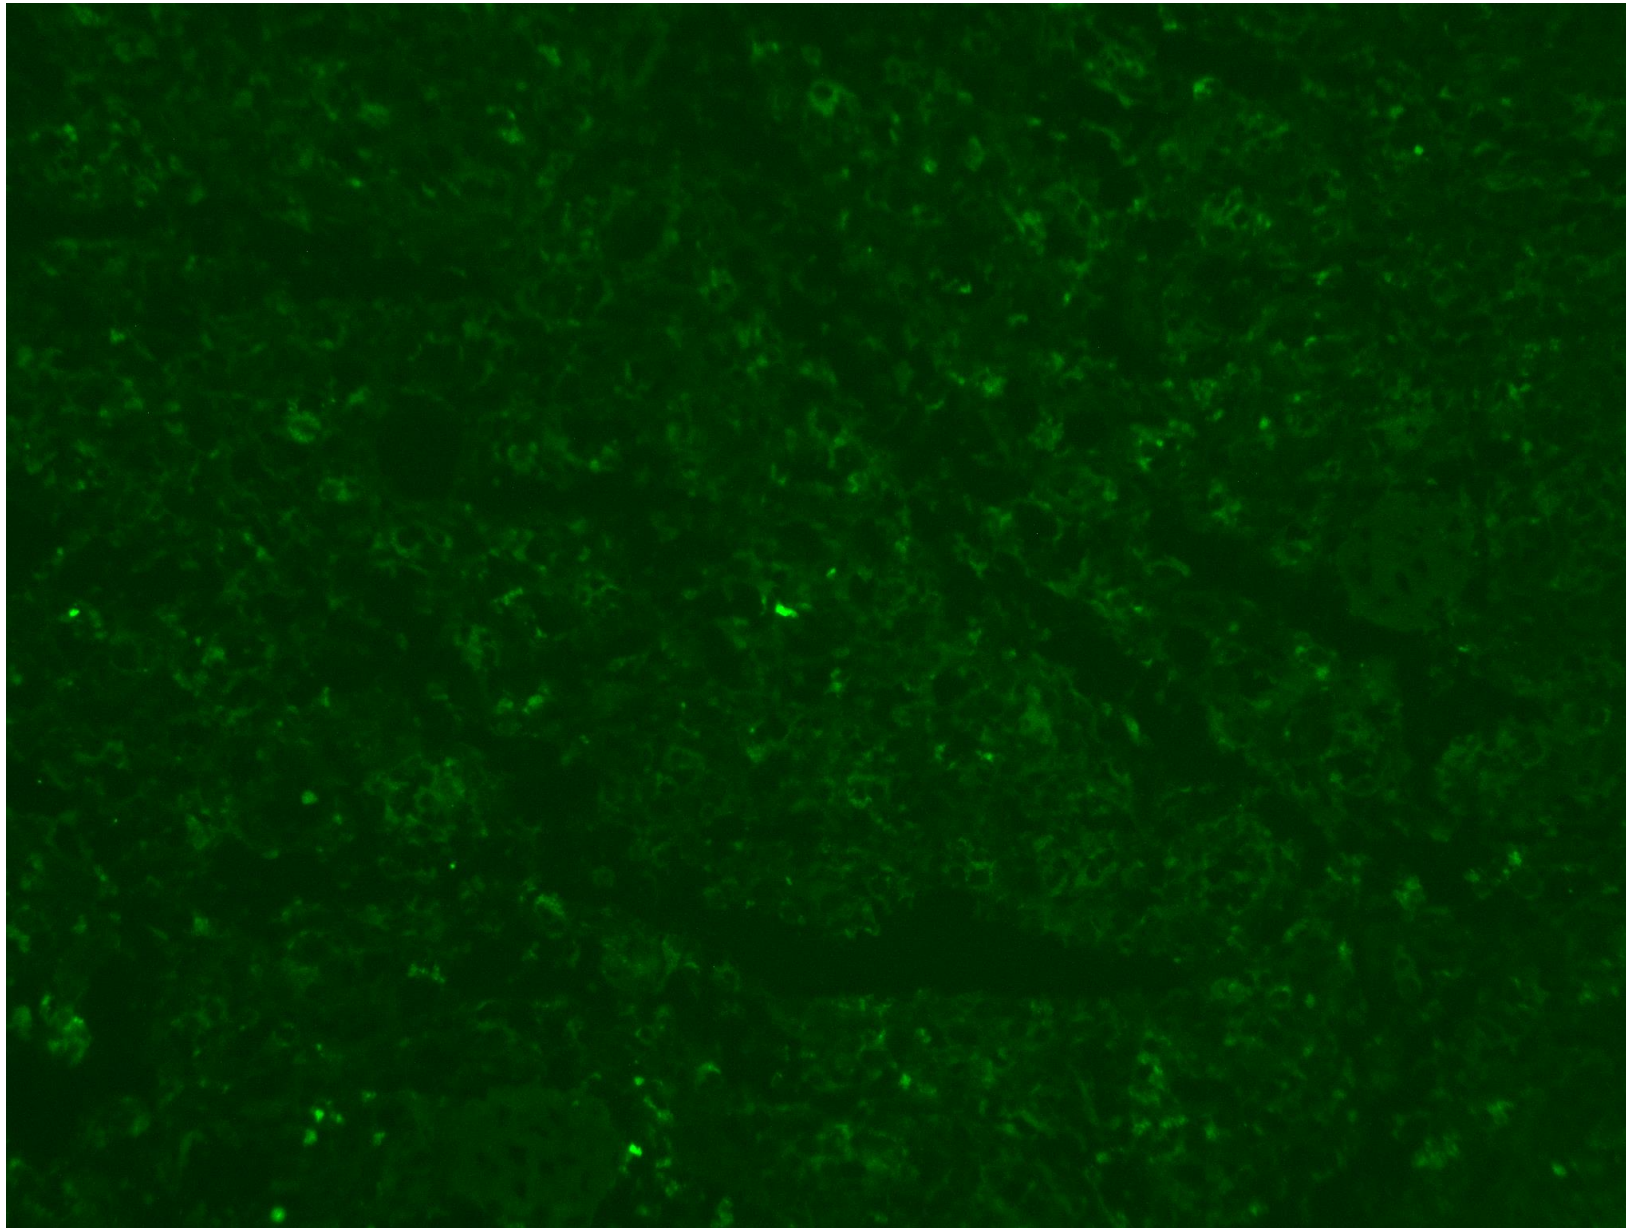

Figure 4B – Middle row

CTx d4 - DAPI

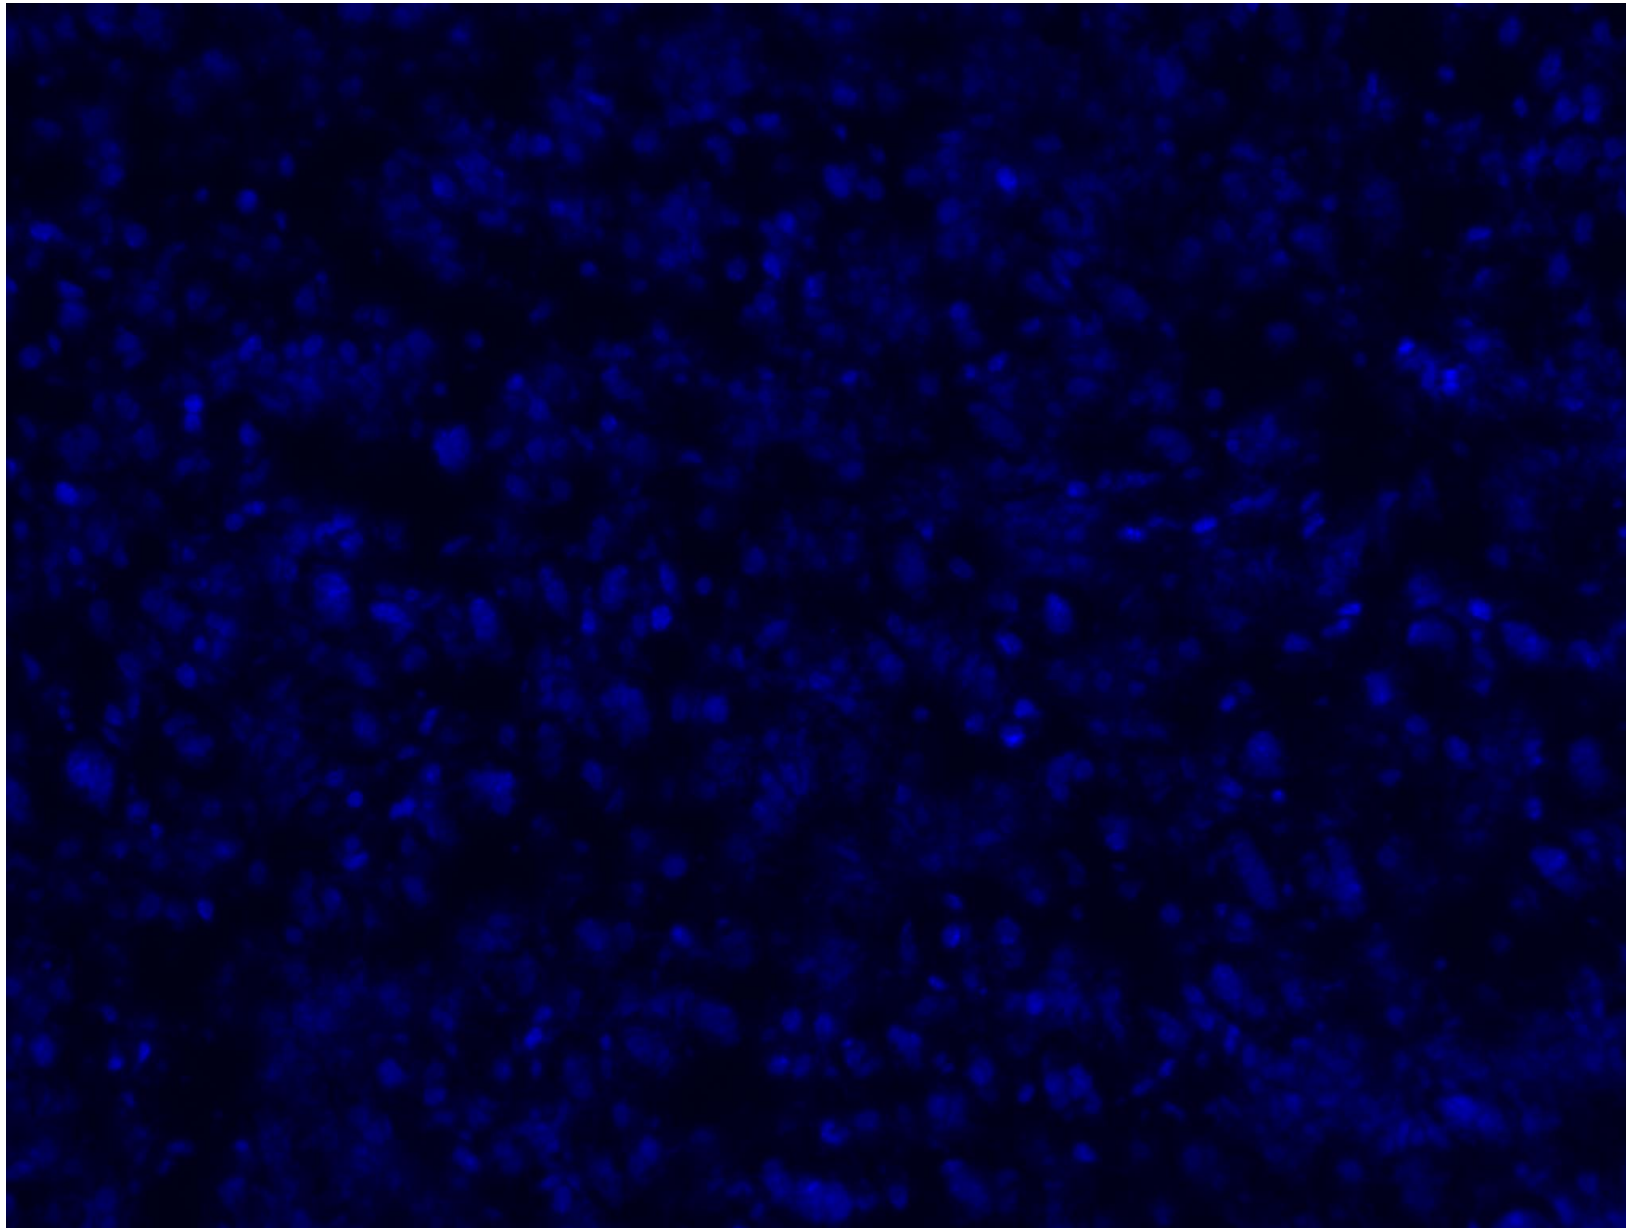

Figure 4B – Middle row

CTx d4 – IL-7R

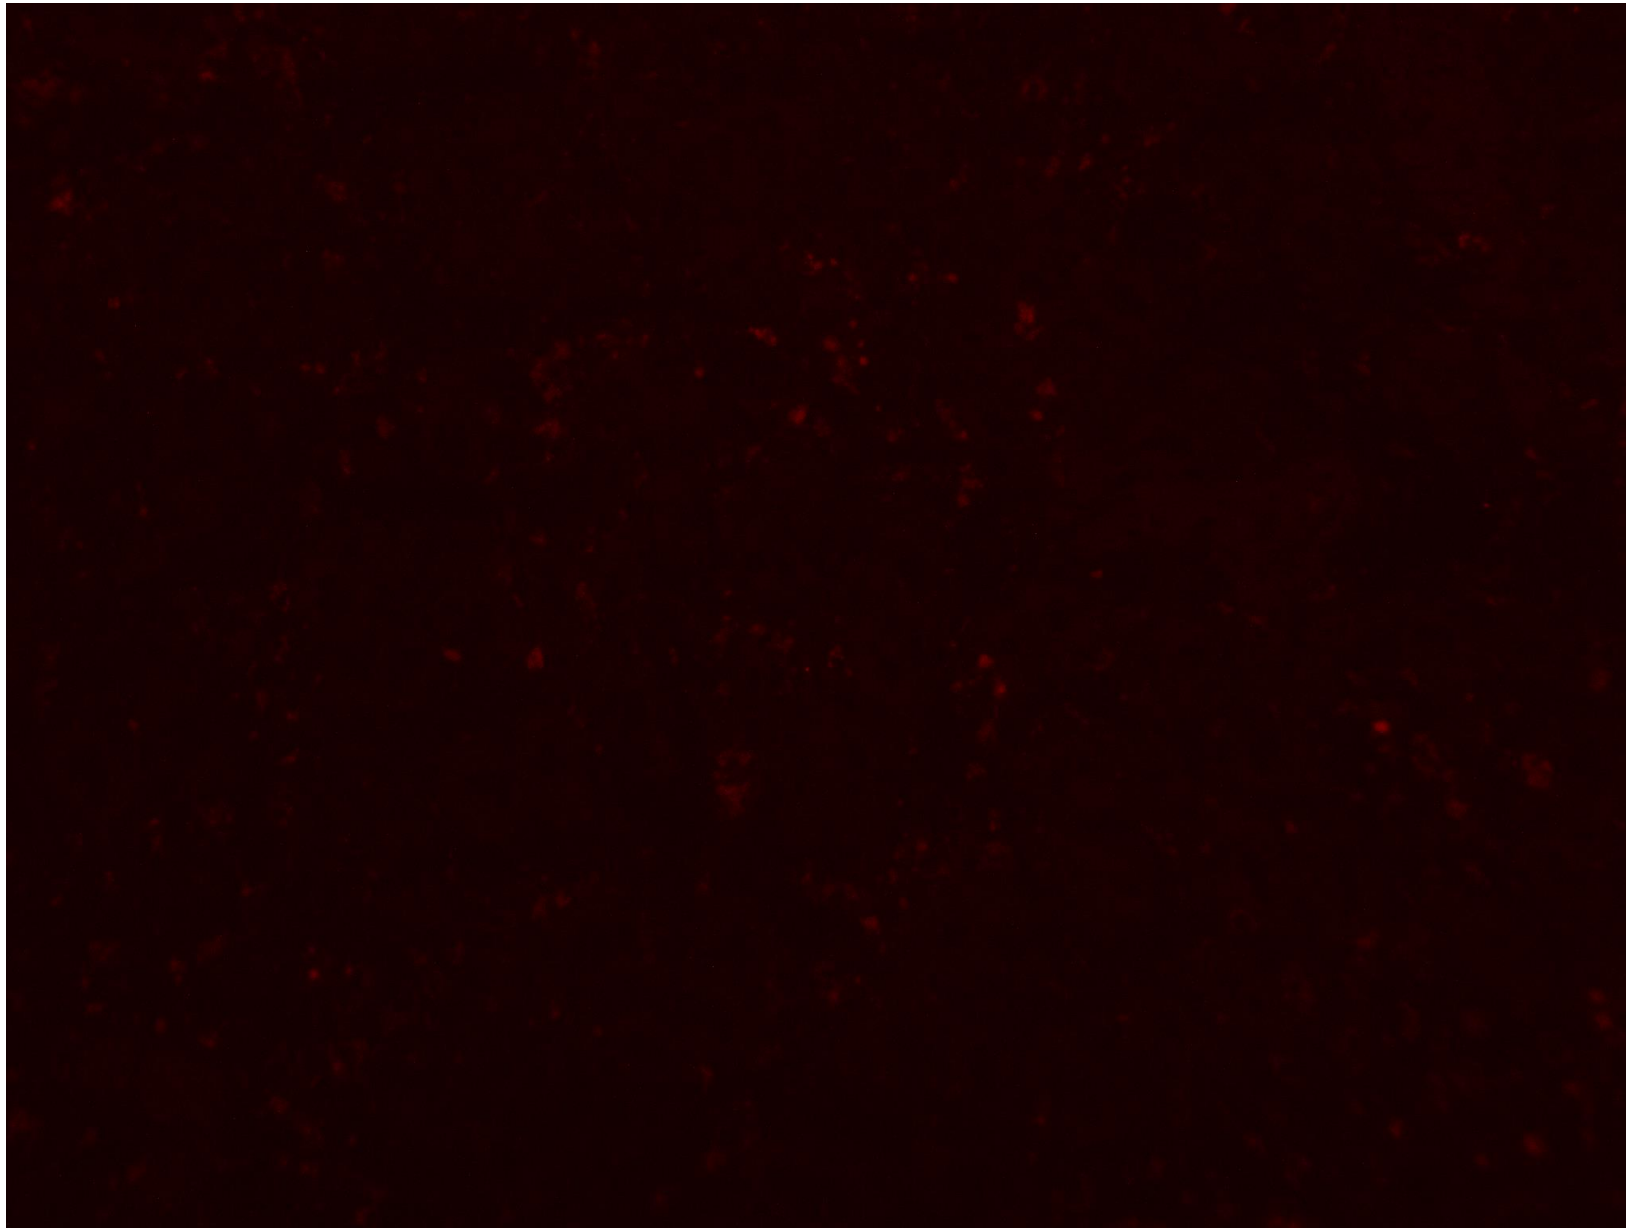

Figure 4B – Middle row

CTx d4 – Ki67

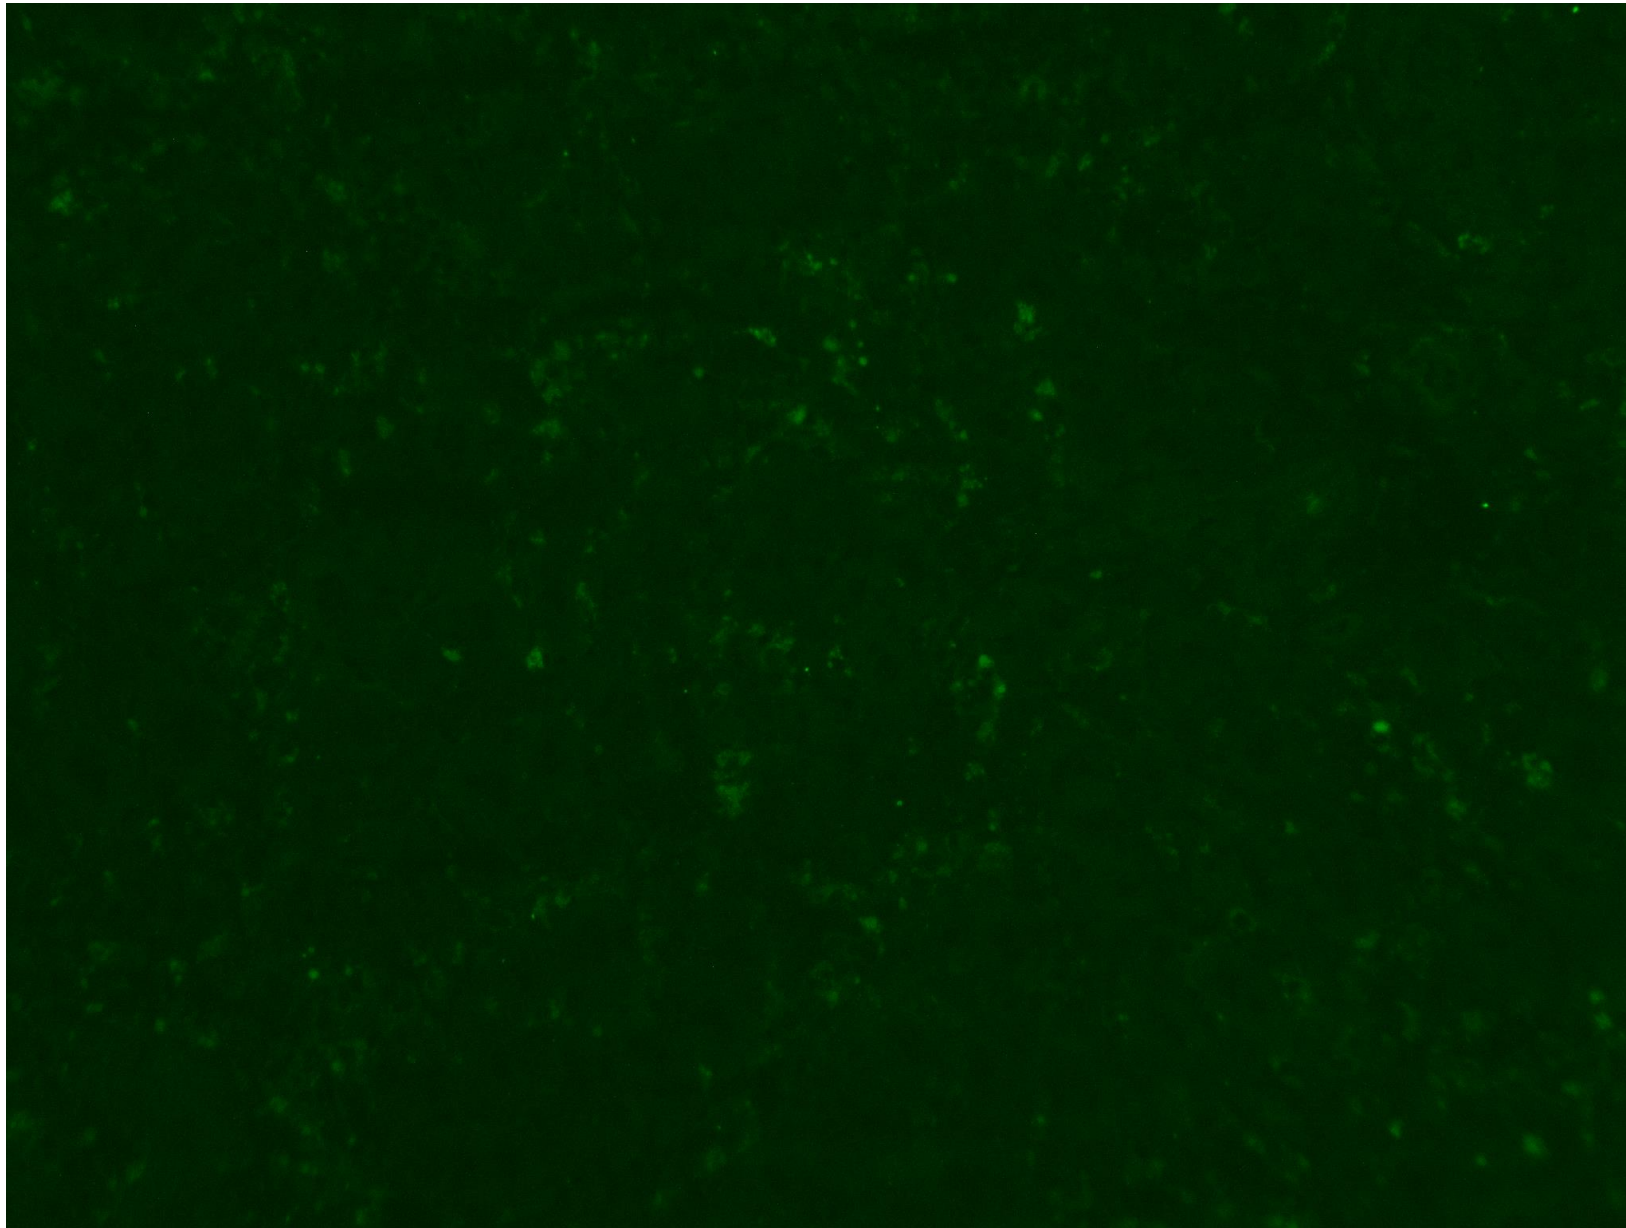

Figure 4B – Middle row

CTx d5 - DAPI

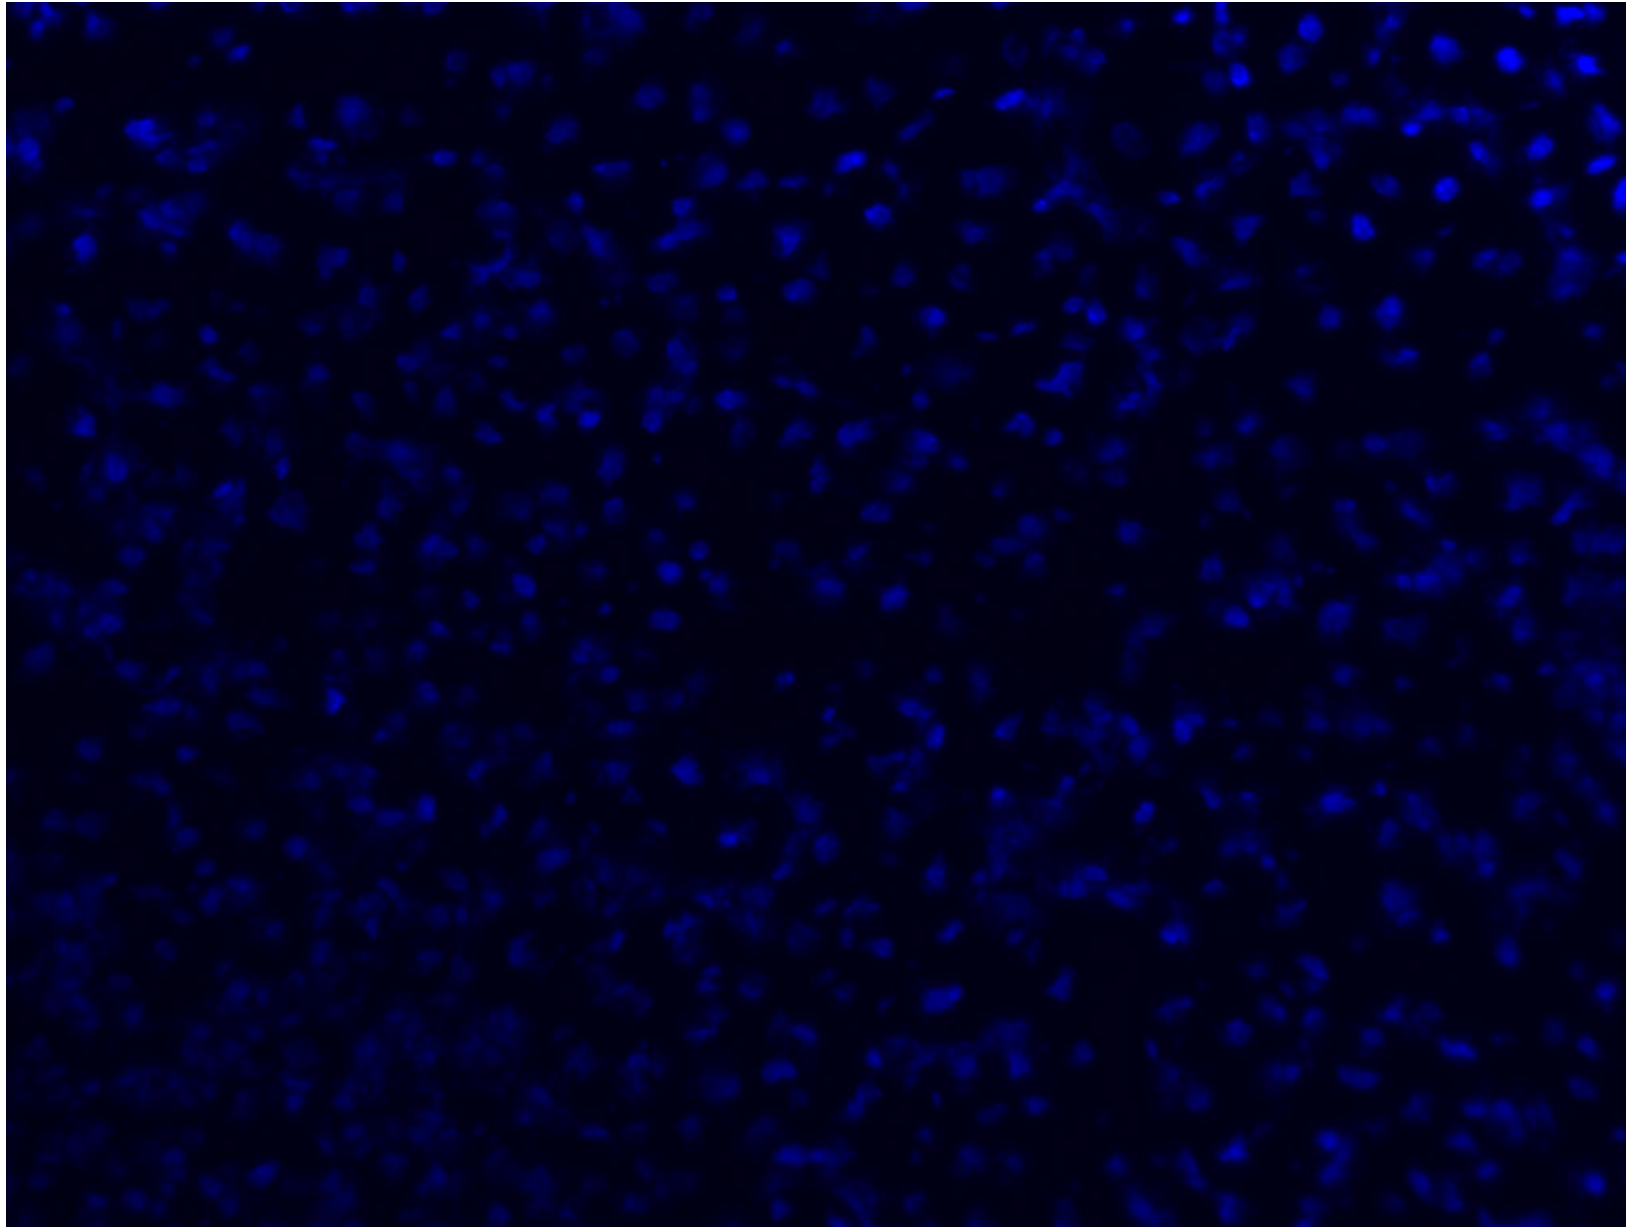

Figure 4B – Middle row

CTx d5 – IL-7R

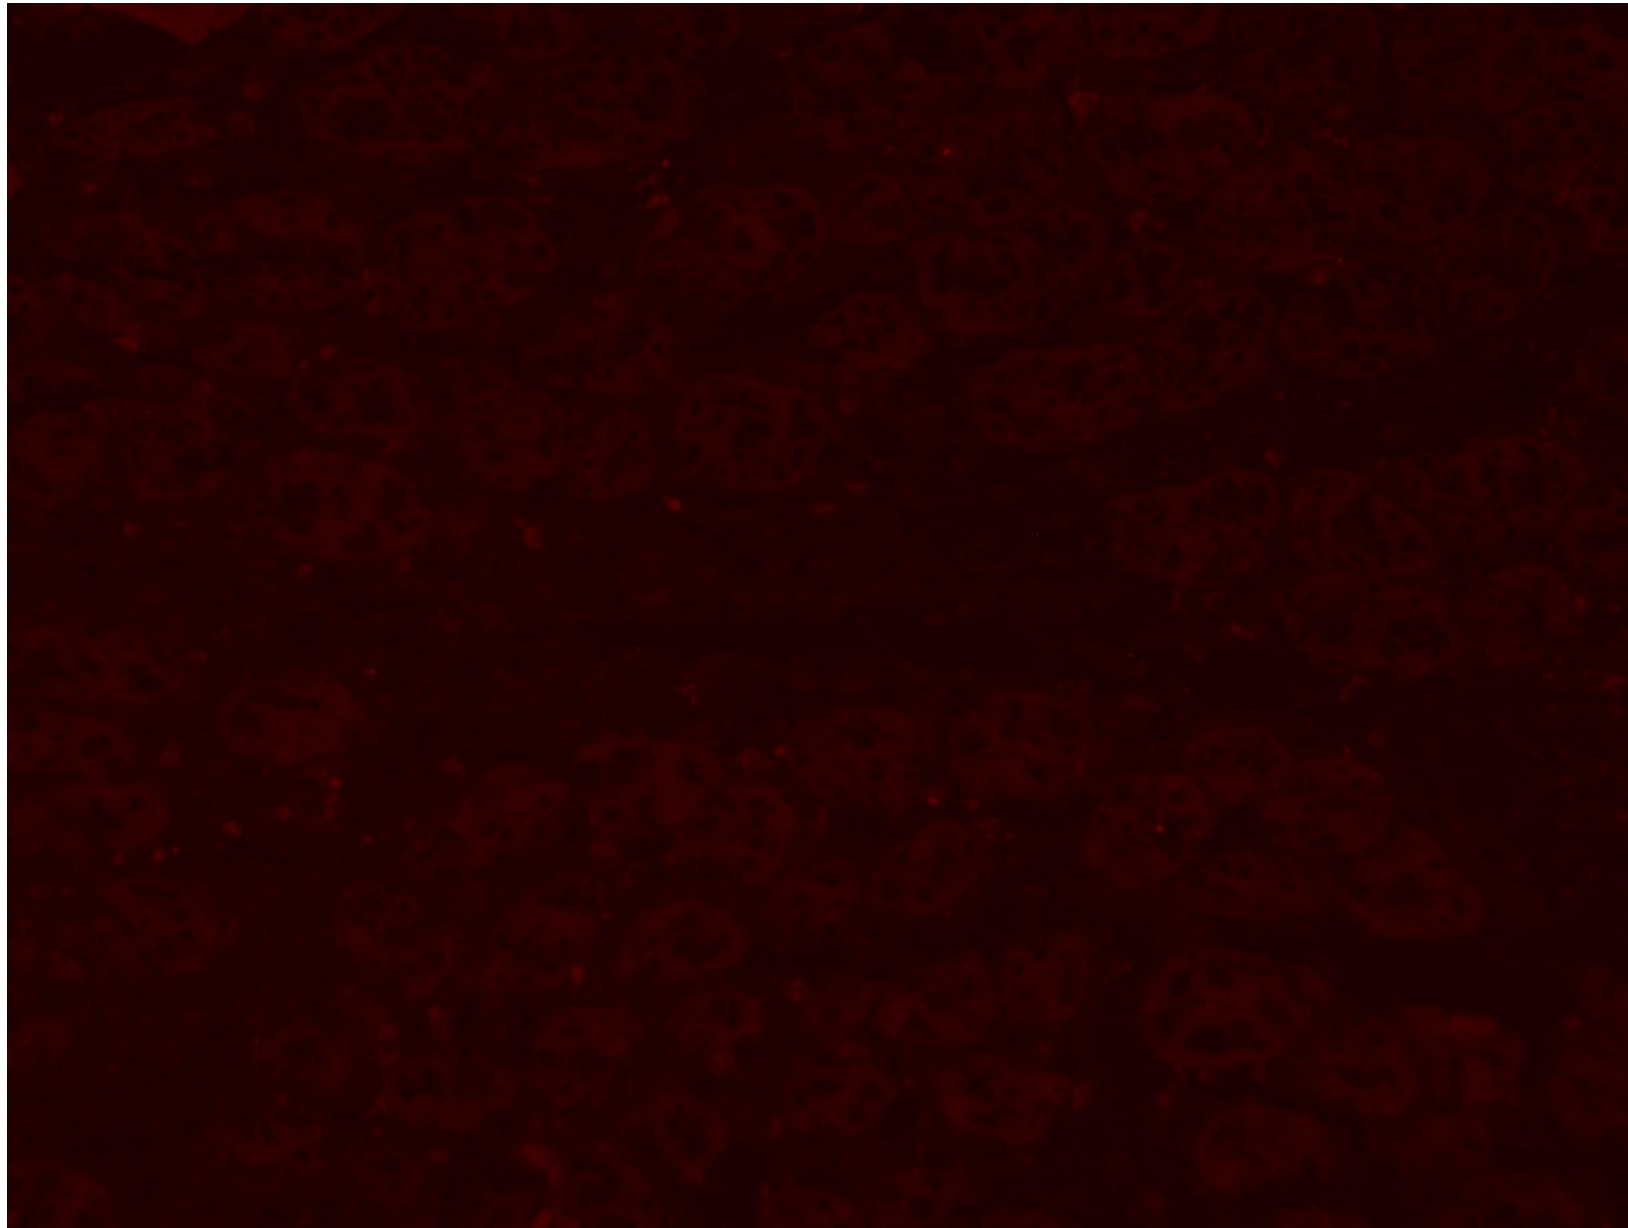

Figure 4B – Middle row

CTx d5 – Ki67

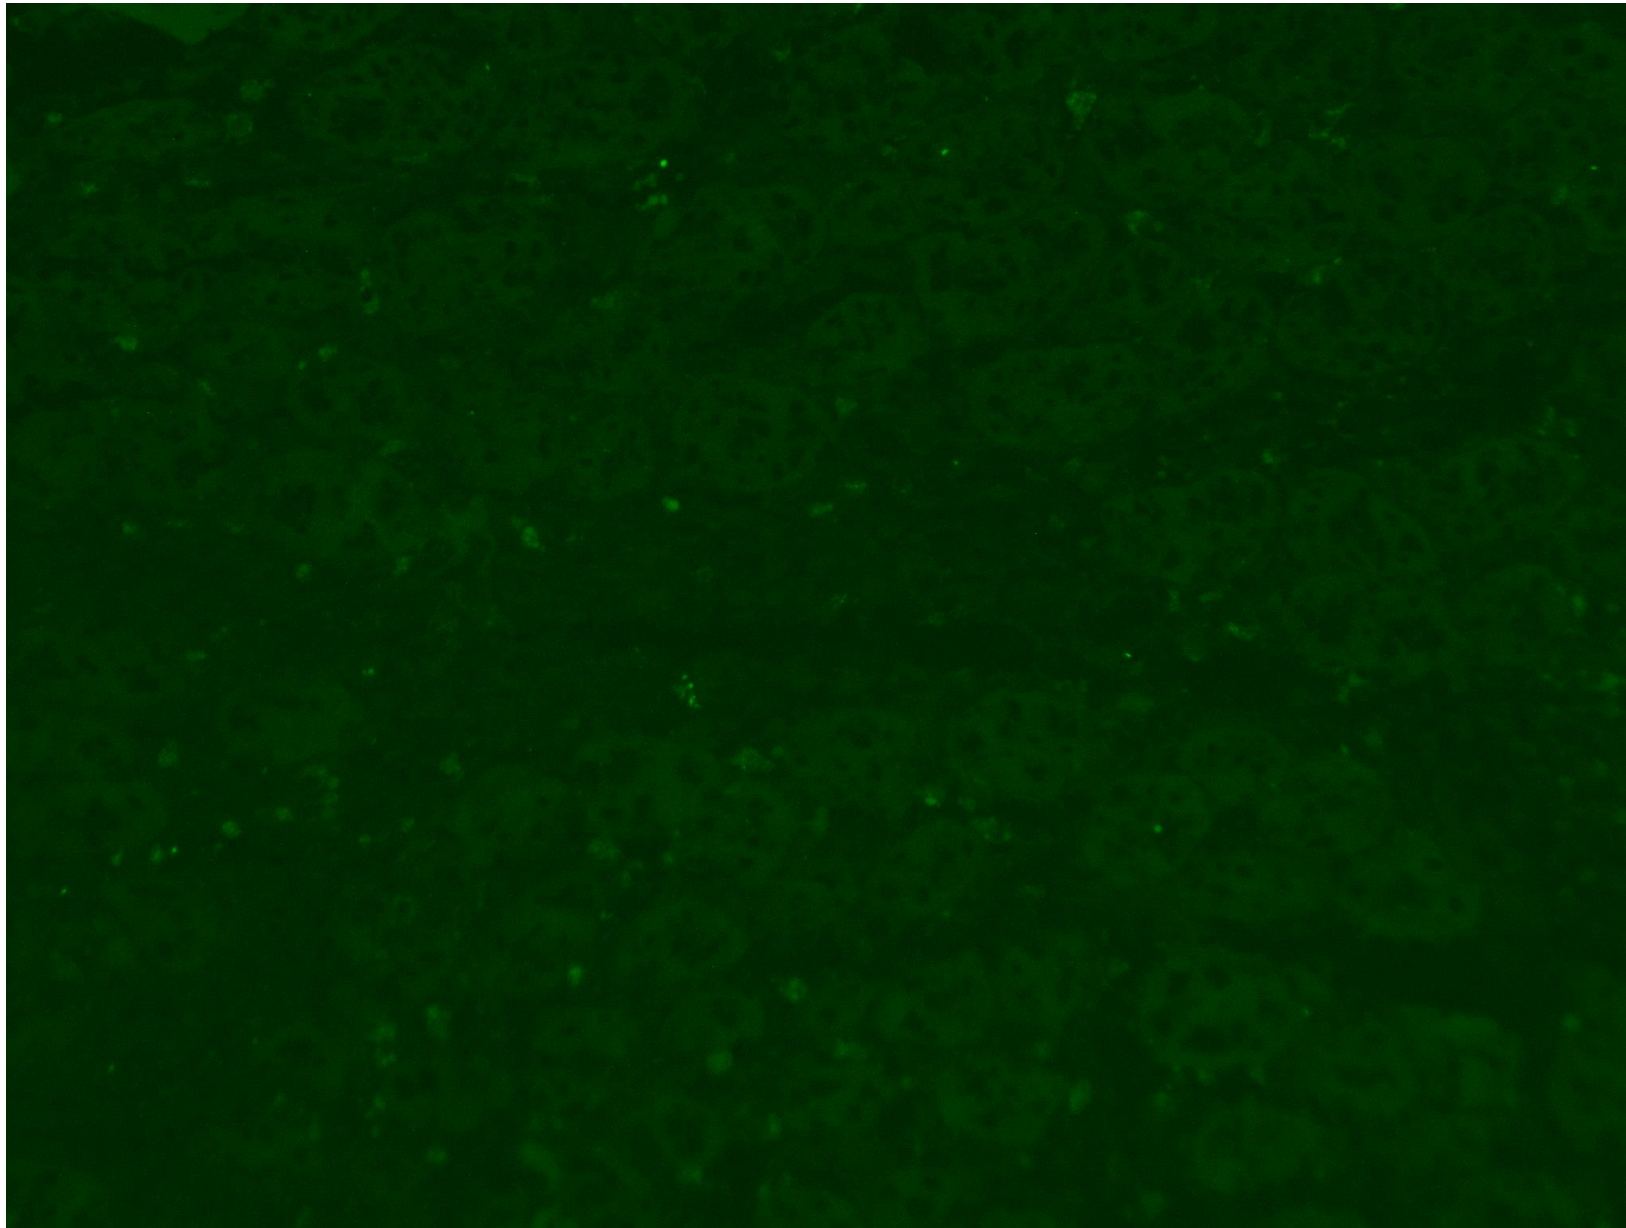

Figure 4B – Bottom row

CTx d0 - DAPI



Figure 4B – Bottom row

CTx d0 – CD163

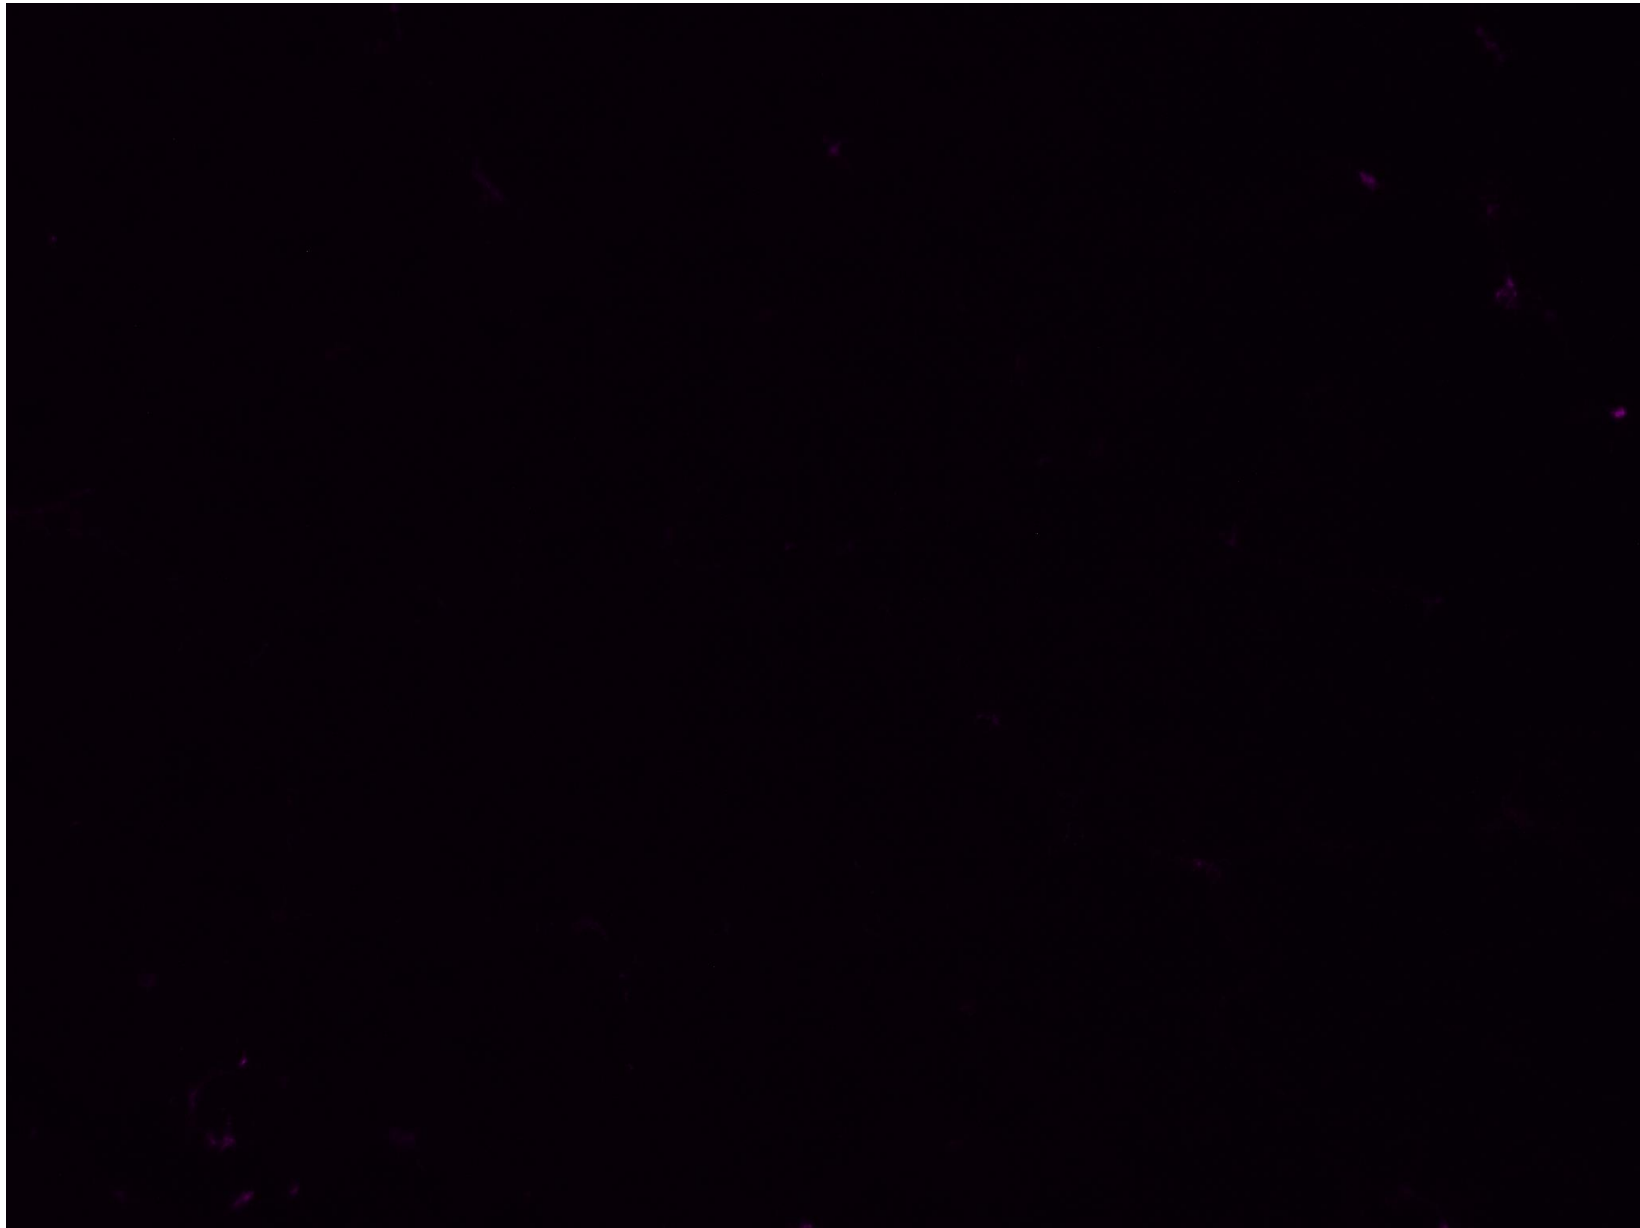

Figure 4B – Bottom row

CTx d0 – Ki67

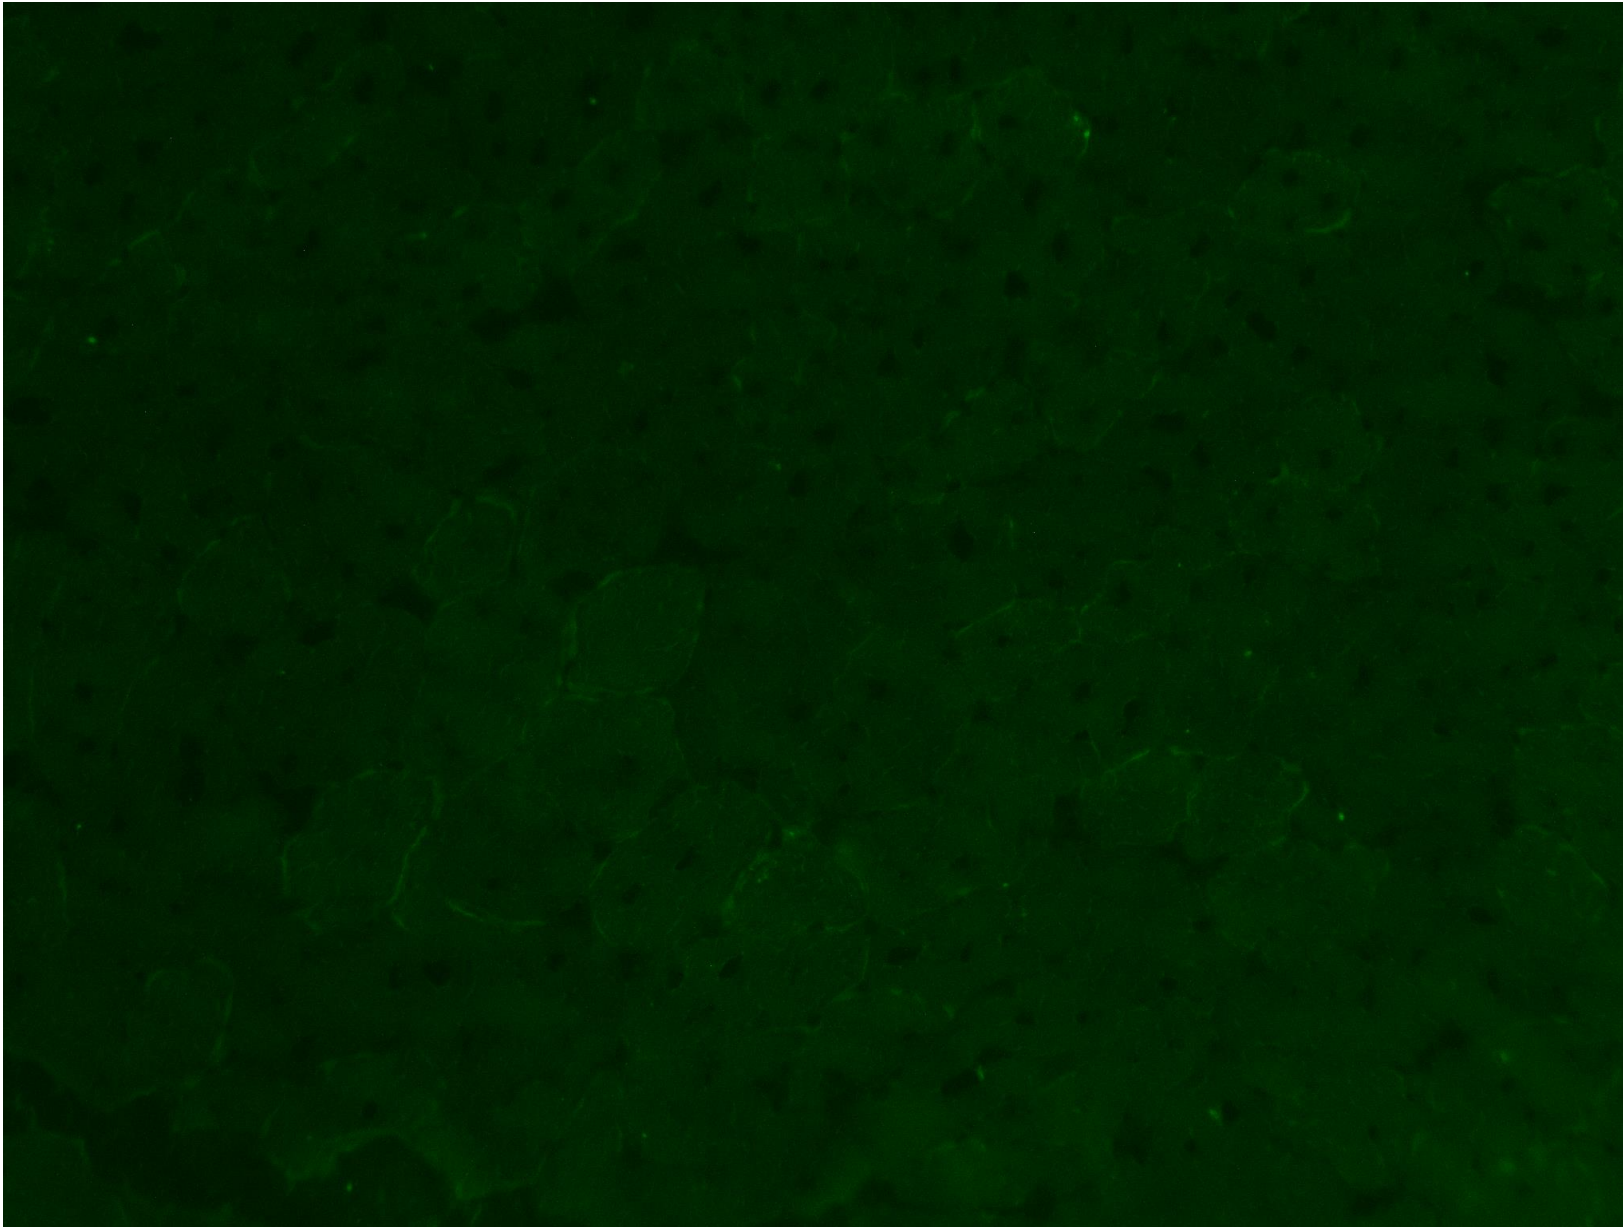

Figure 4B – Bottom row

CTx d3 - DAPI



Figure 4B – Bottom row

CTx d3 – CD163

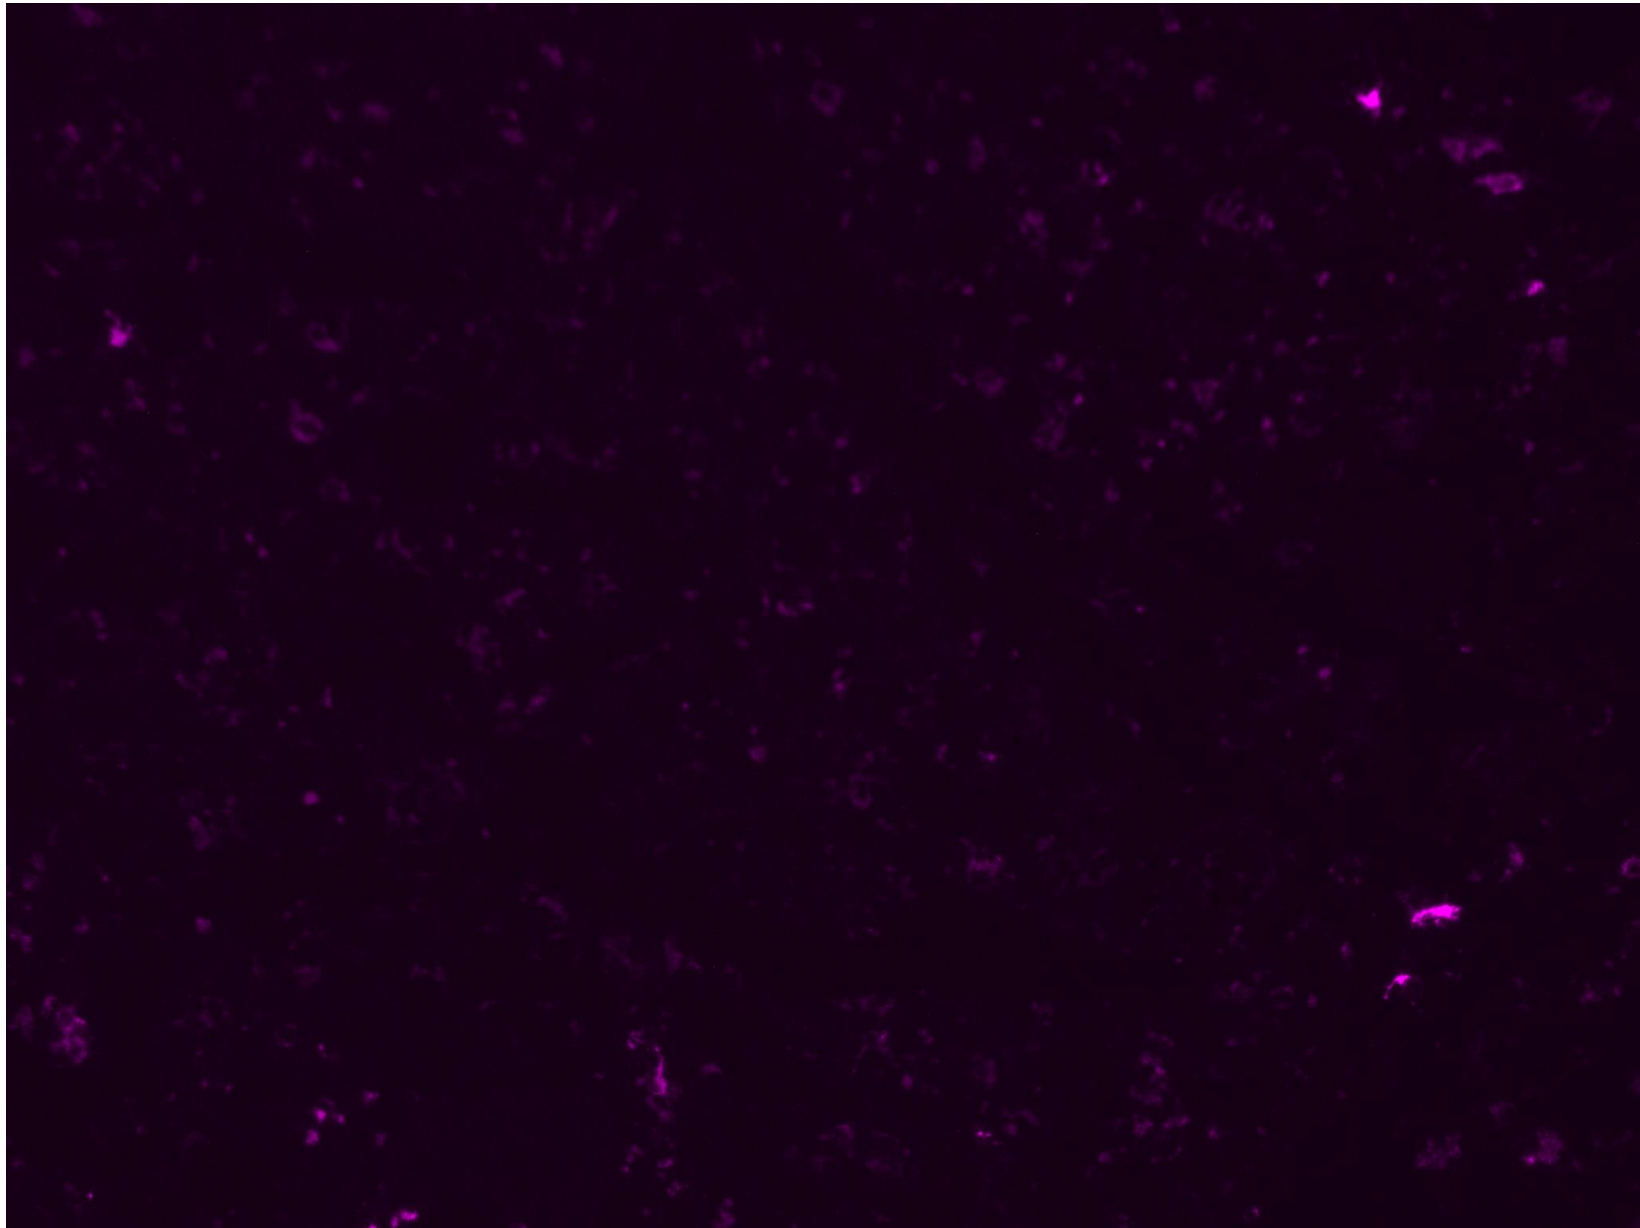

Figure 4B – Bottom row

CTx d3 – Ki67

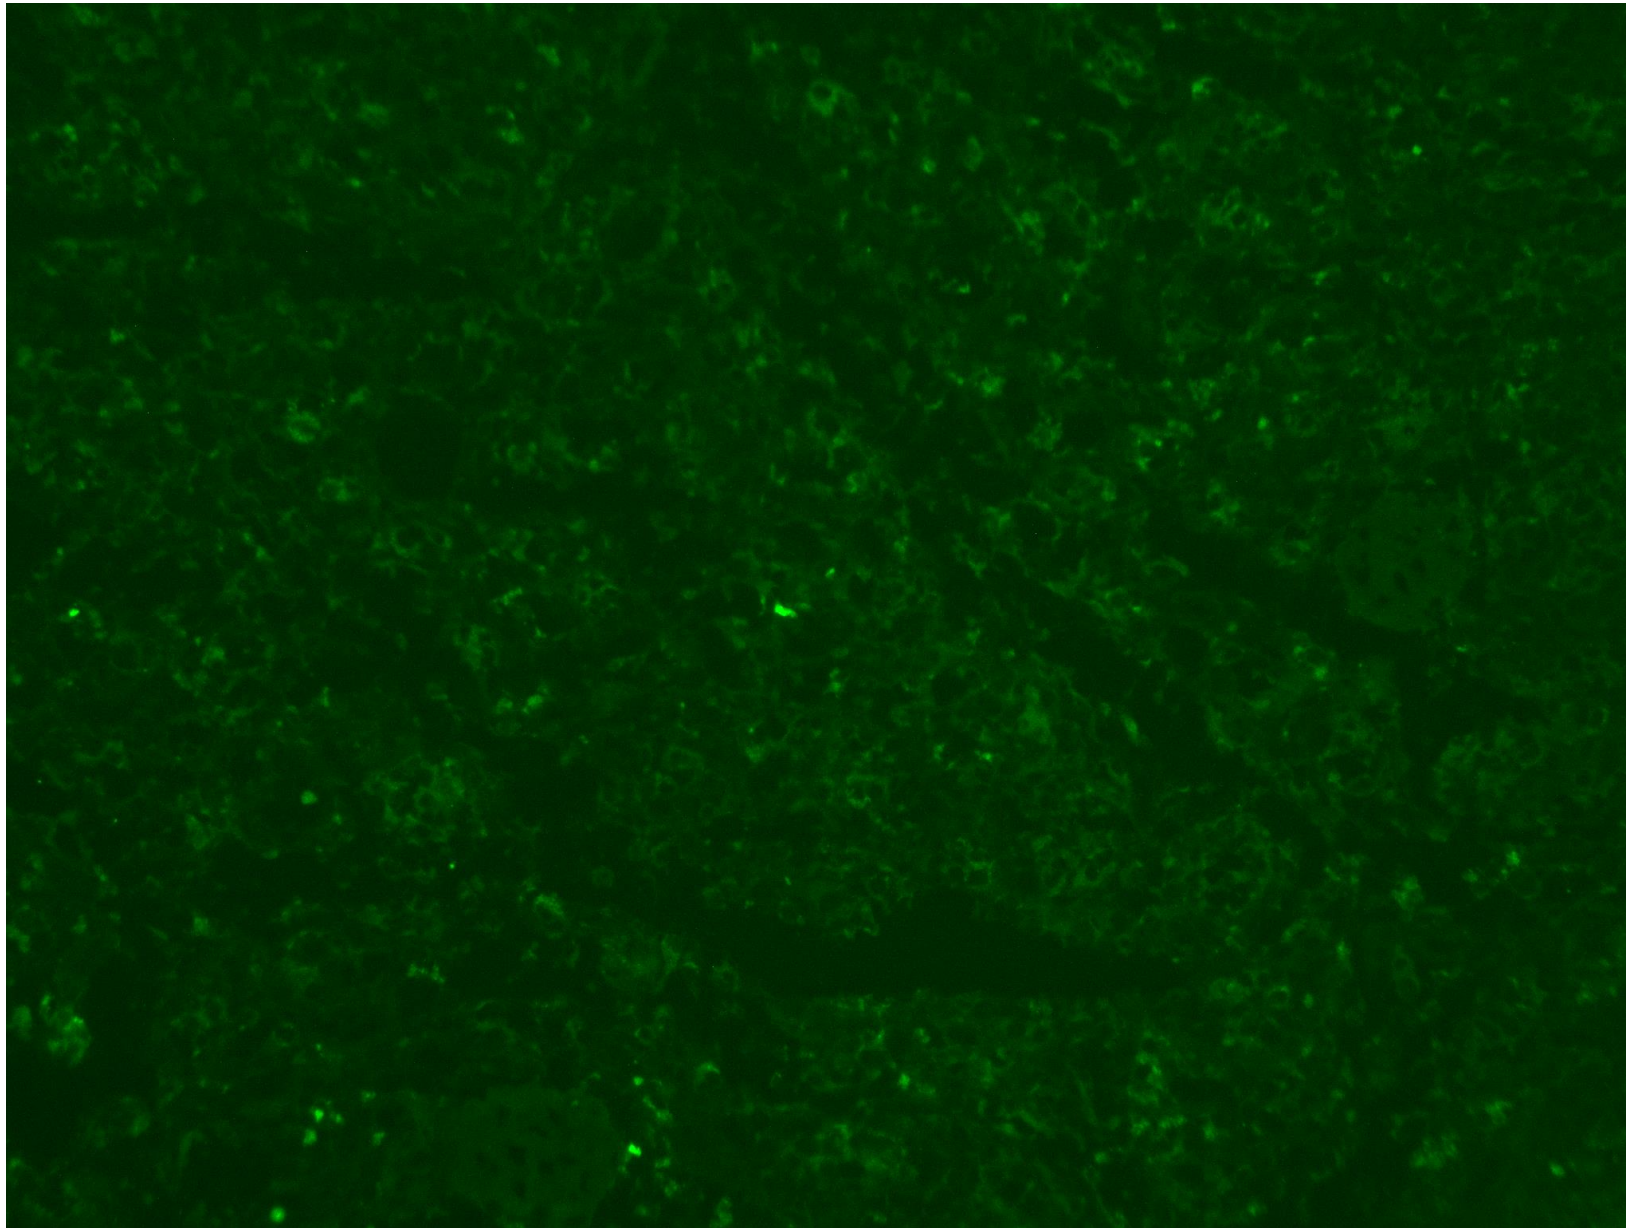

Figure 4B – Bottom row

CTx d4 - DAPI



Figure 4B – Bottom row

CTx d4 – CD163

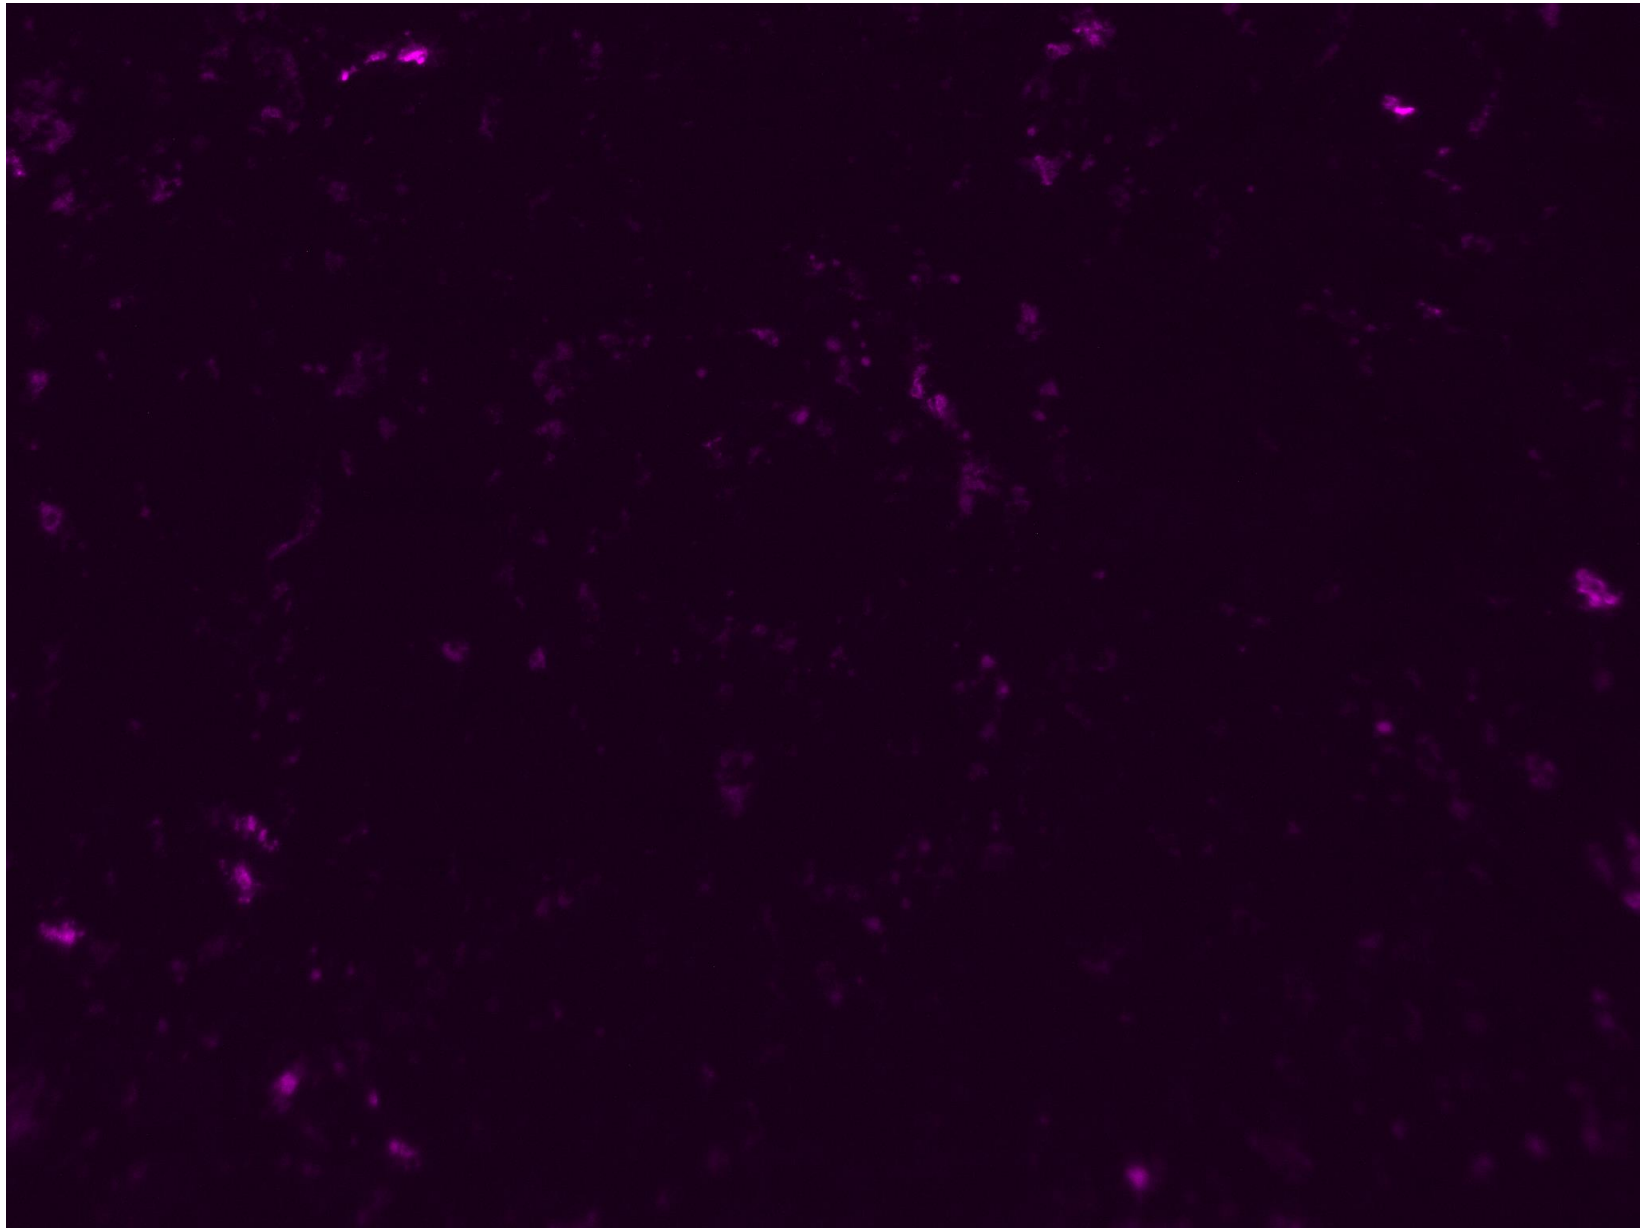

Figure 4B – Bottom row

CTx d4 – Ki67



Figure 4B – Bottom row

CTx d5 - DAPI

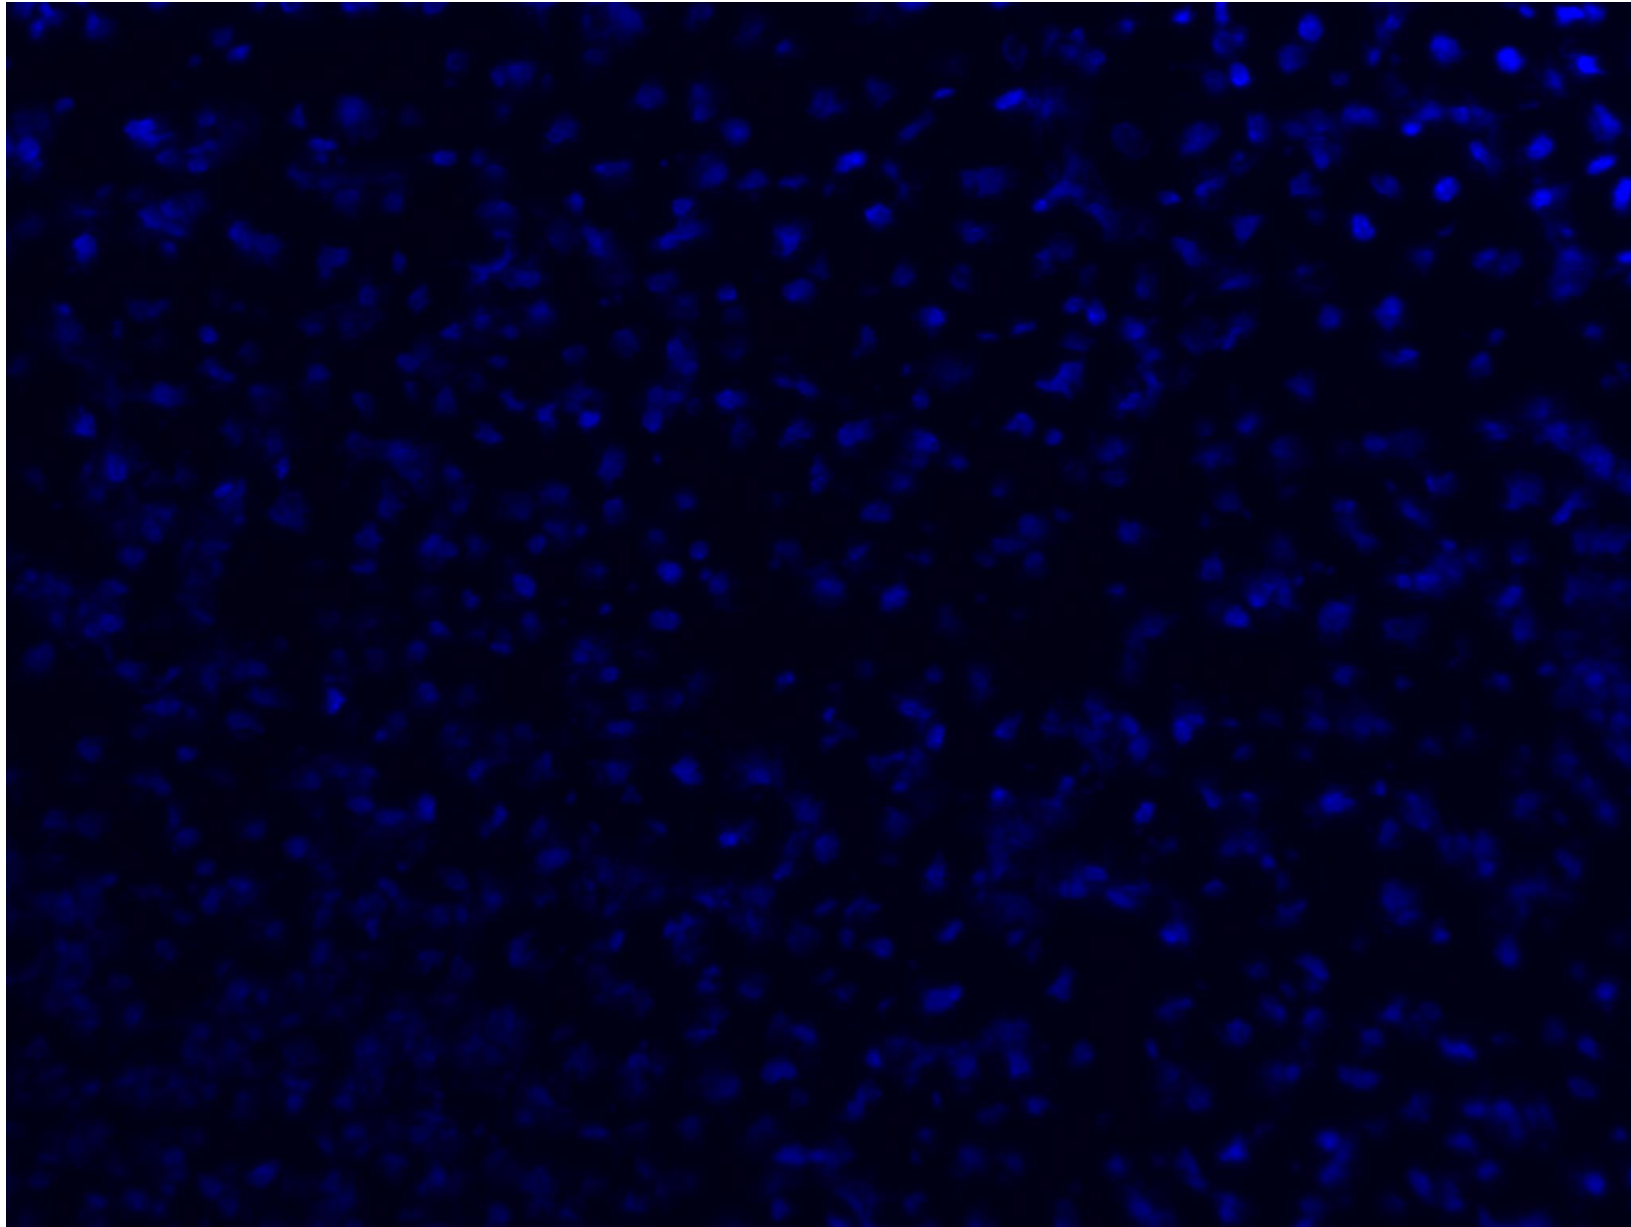

Figure 4B – Bottom row

CTx d5 – CD163

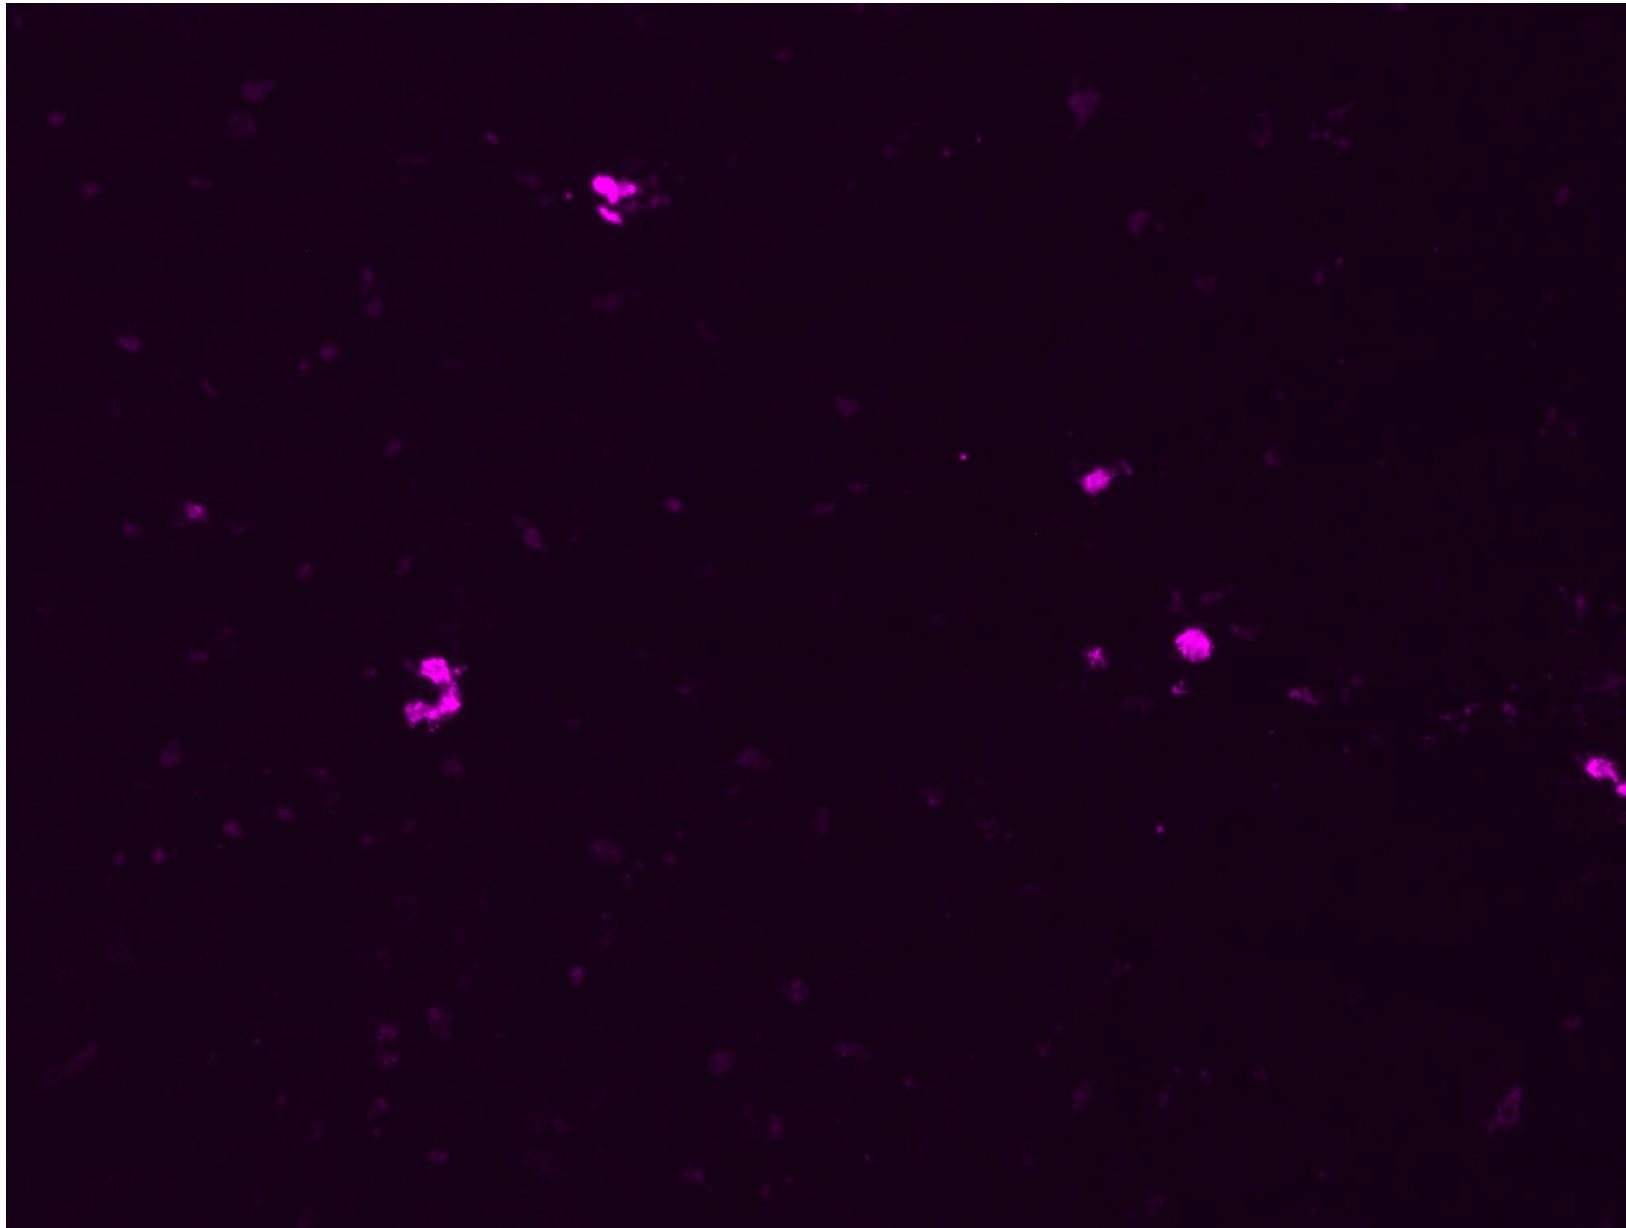

Figure 4B – Bottom row

CTx d5 – Ki67



Figure 7A

12 mo B6 TA

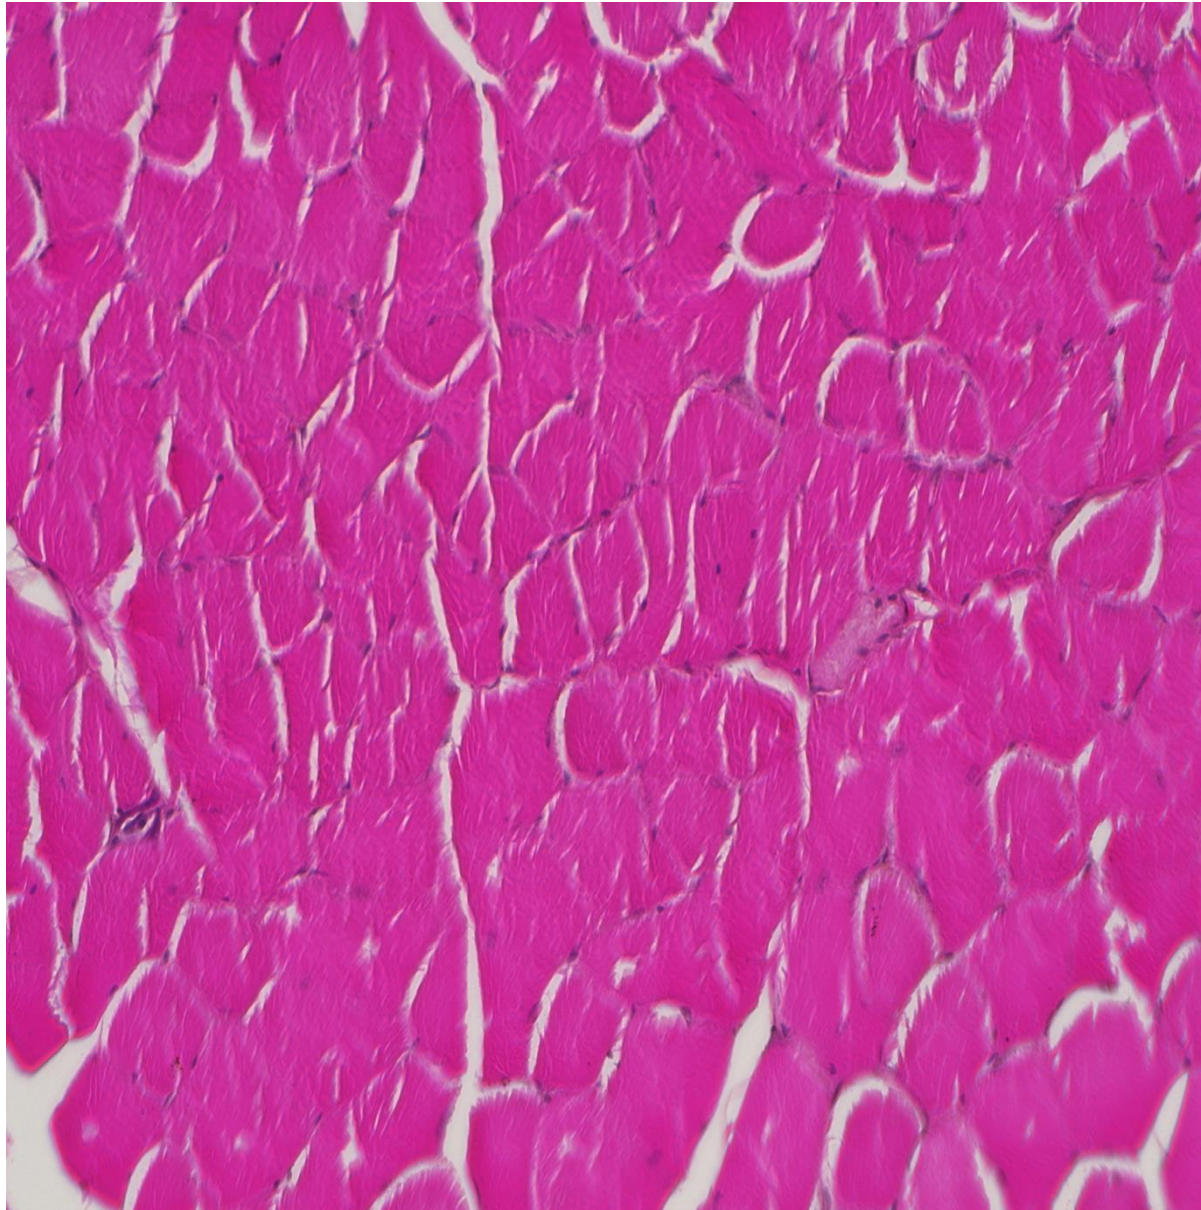

Figure 7A

12 mo B6 GM

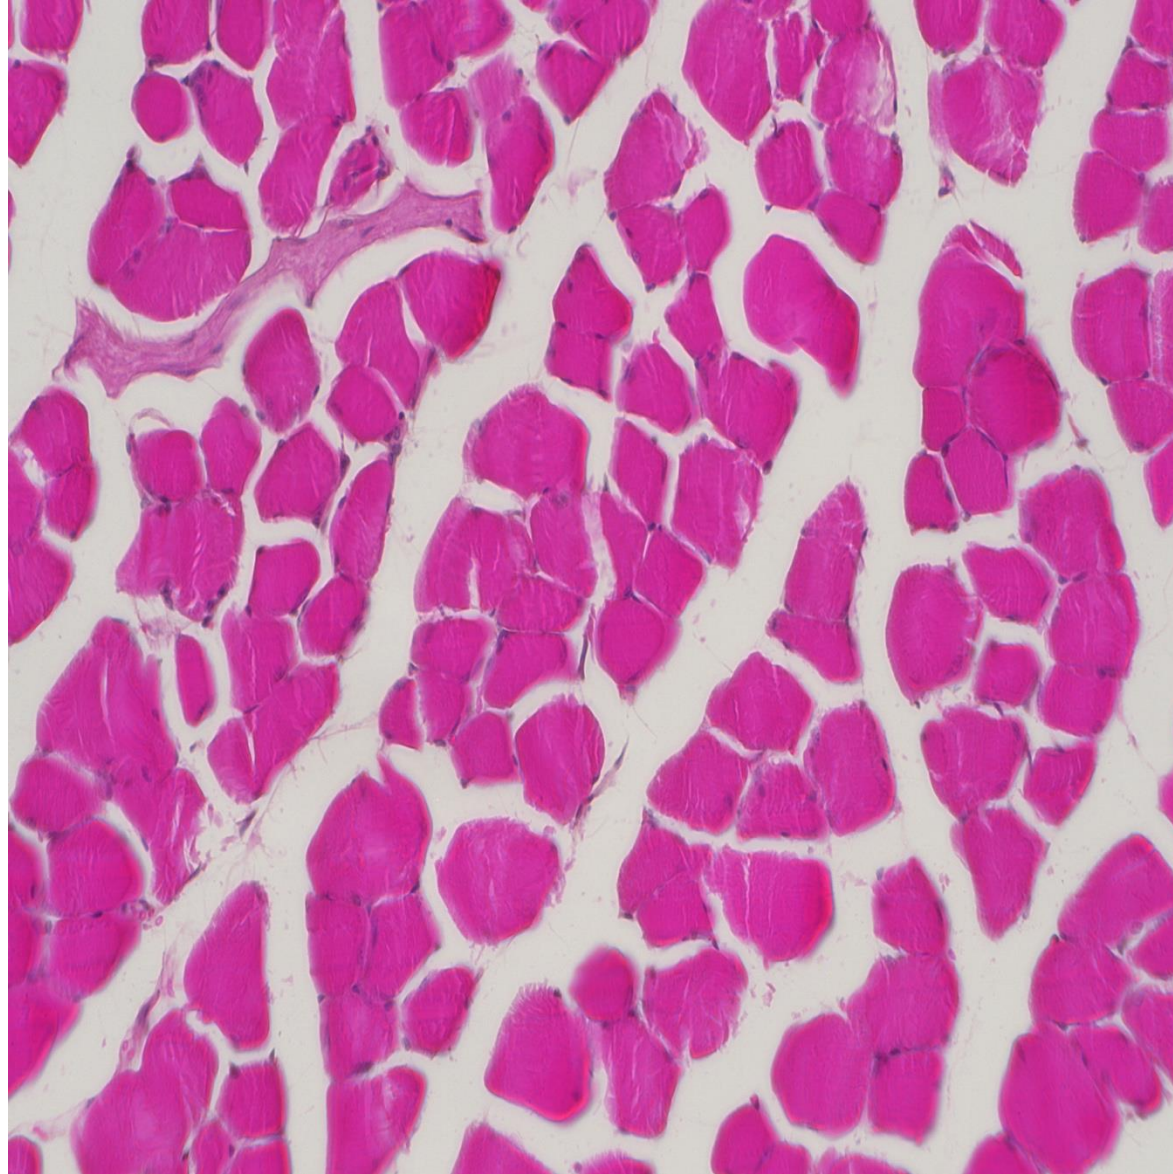

Figure 7A

12 mo BLA/J TA

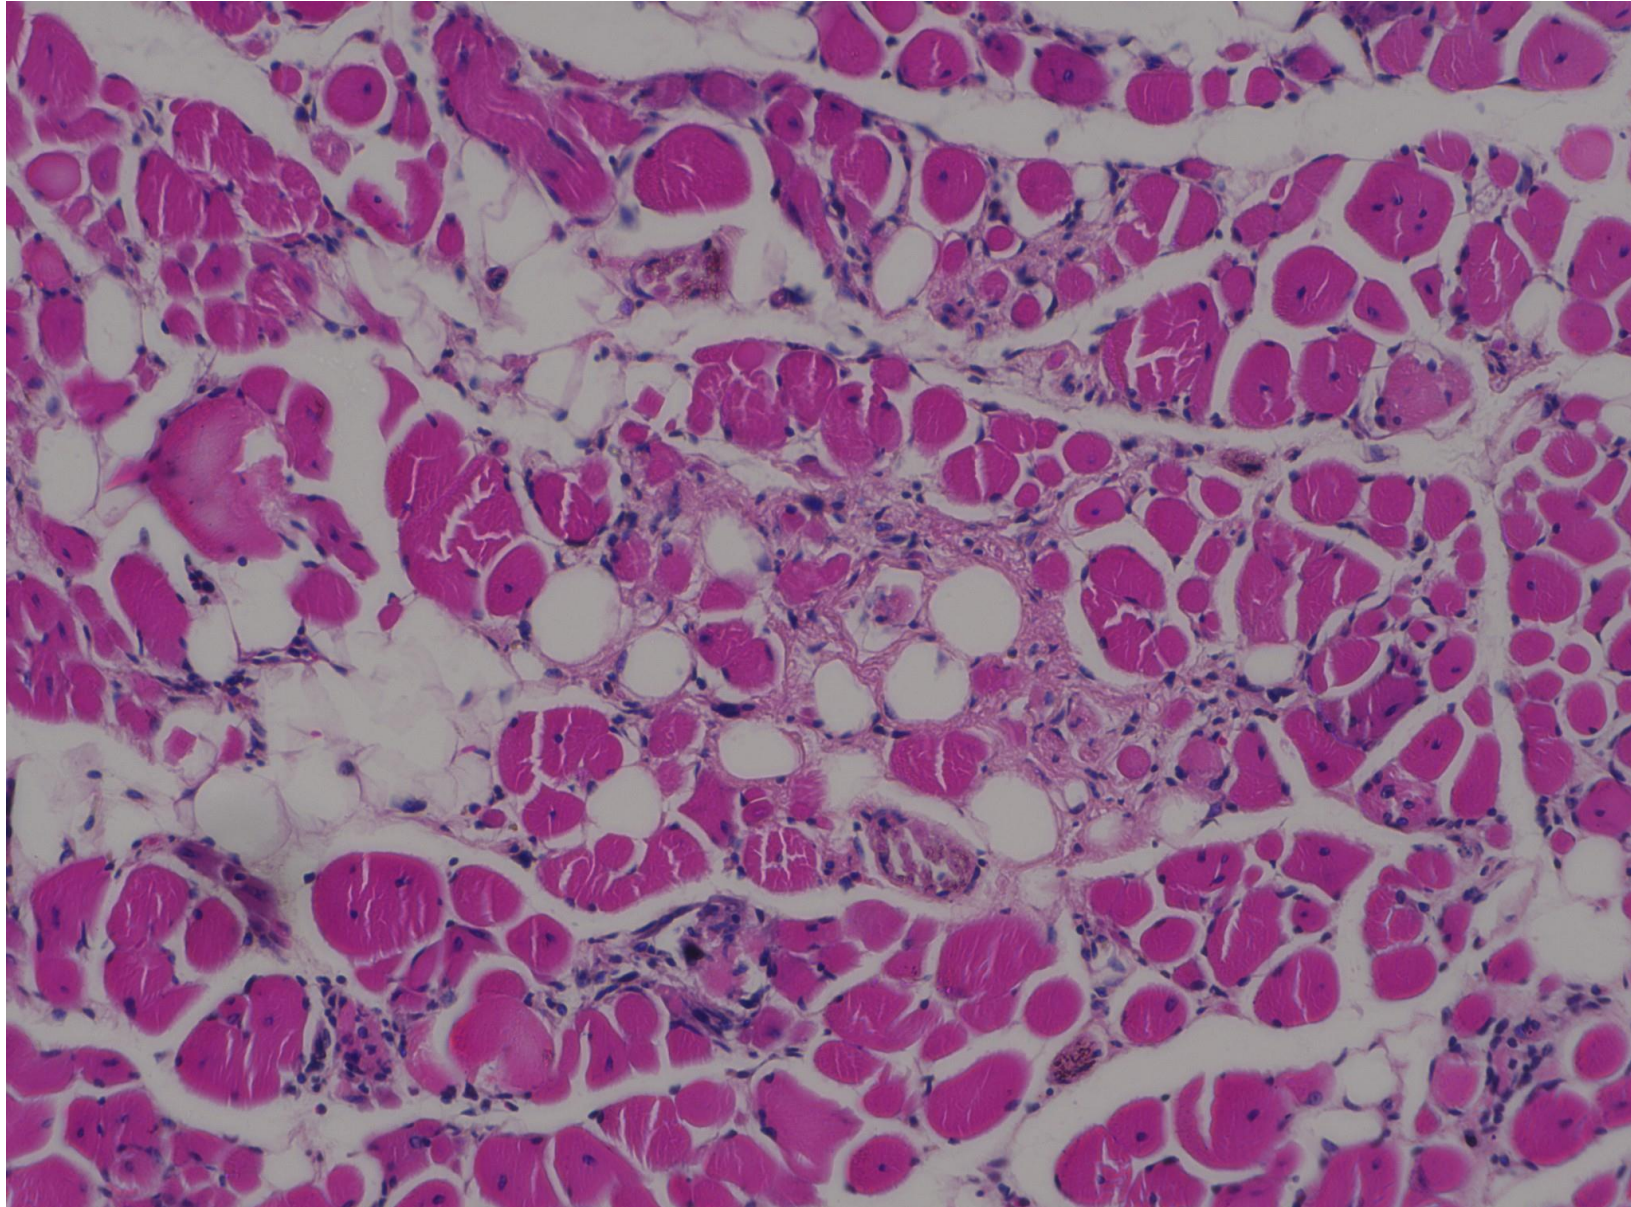

Figure 7A

12 mo BLA/J GM

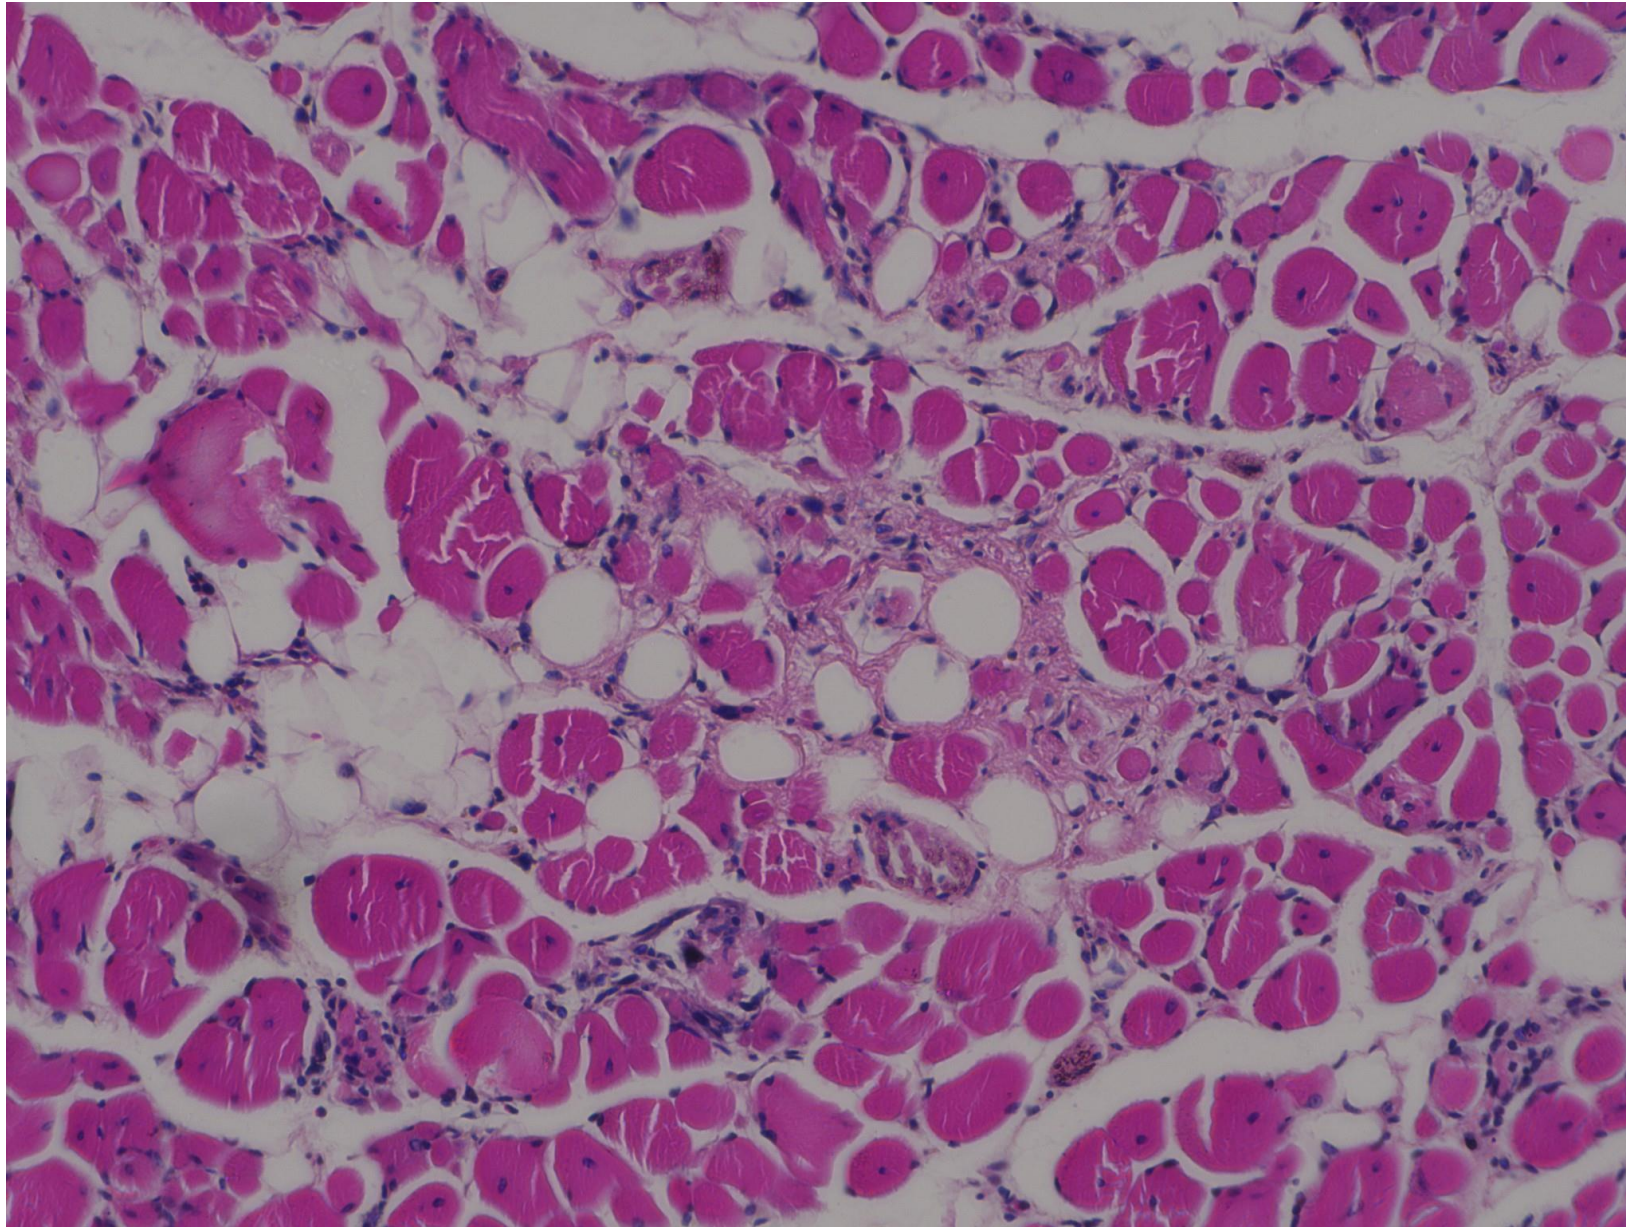

Figure 7B

12 mo BLA/J TA – CD68

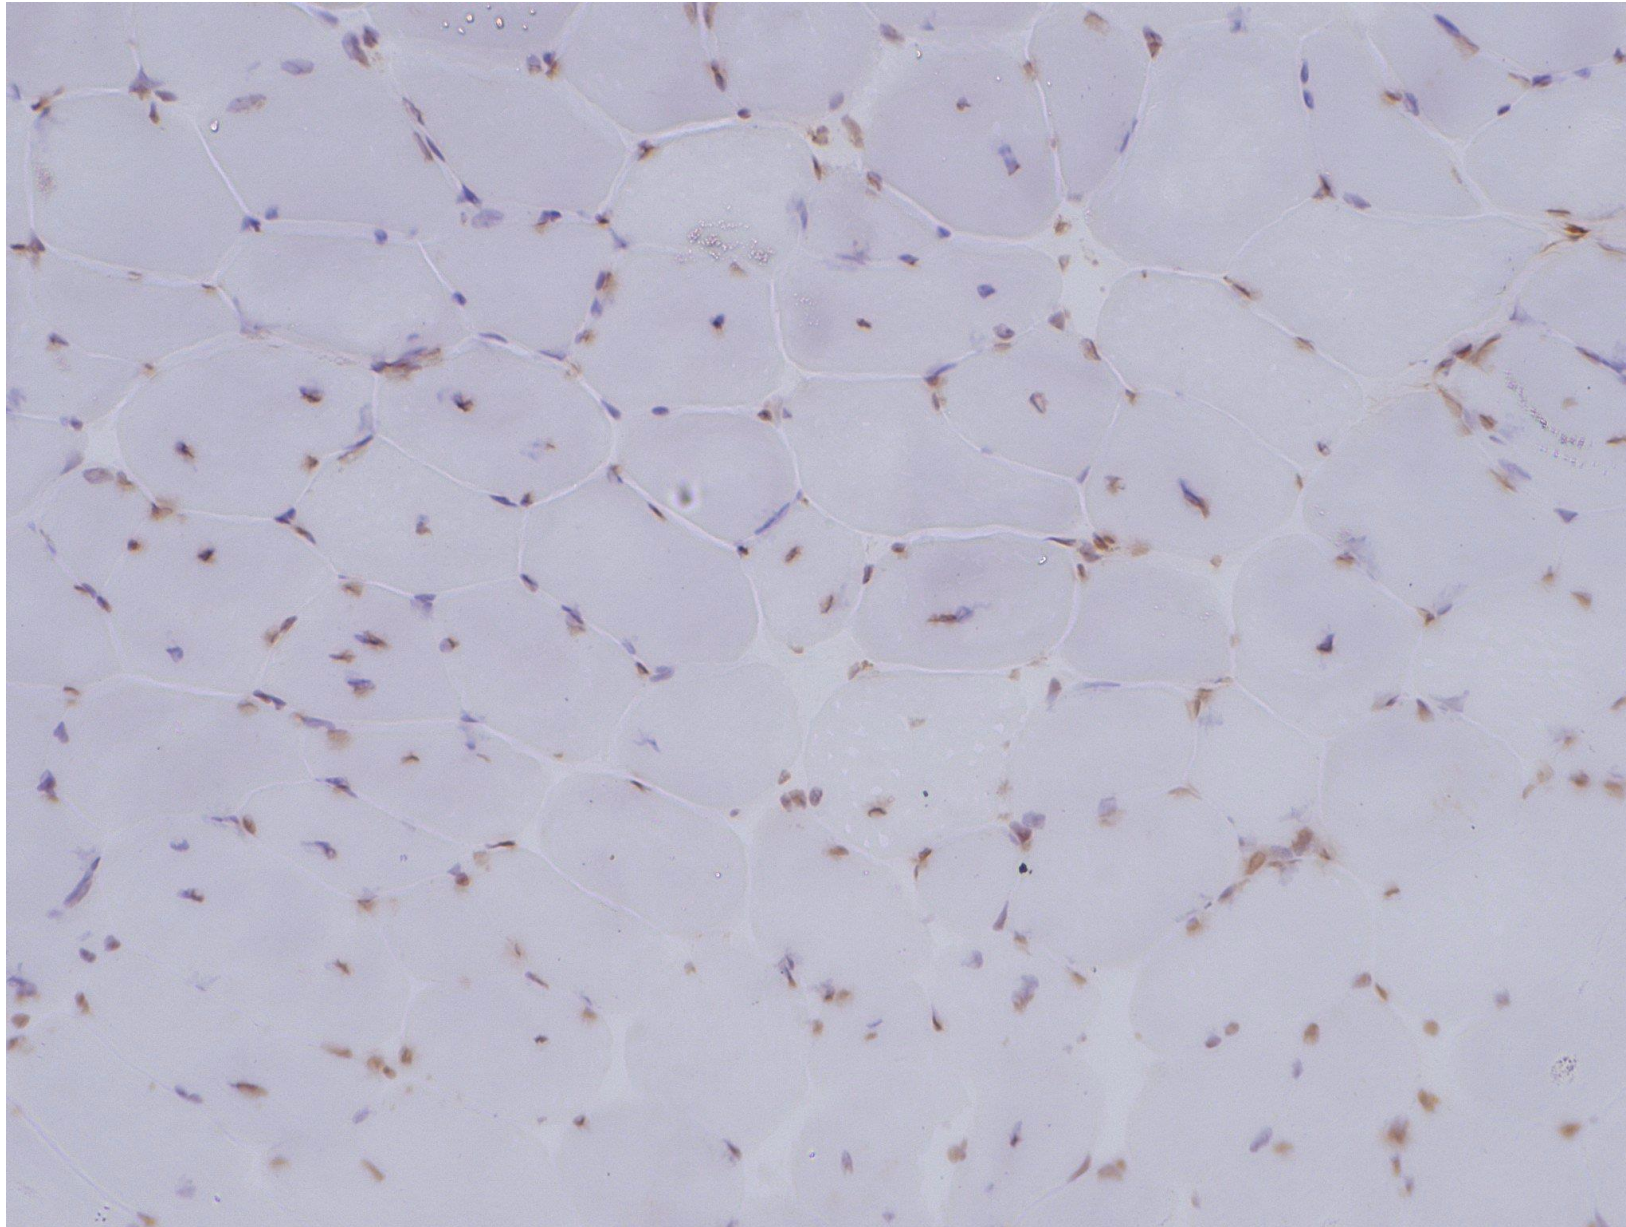

Figure 7B

12 mo BLA/J TA – F4/80

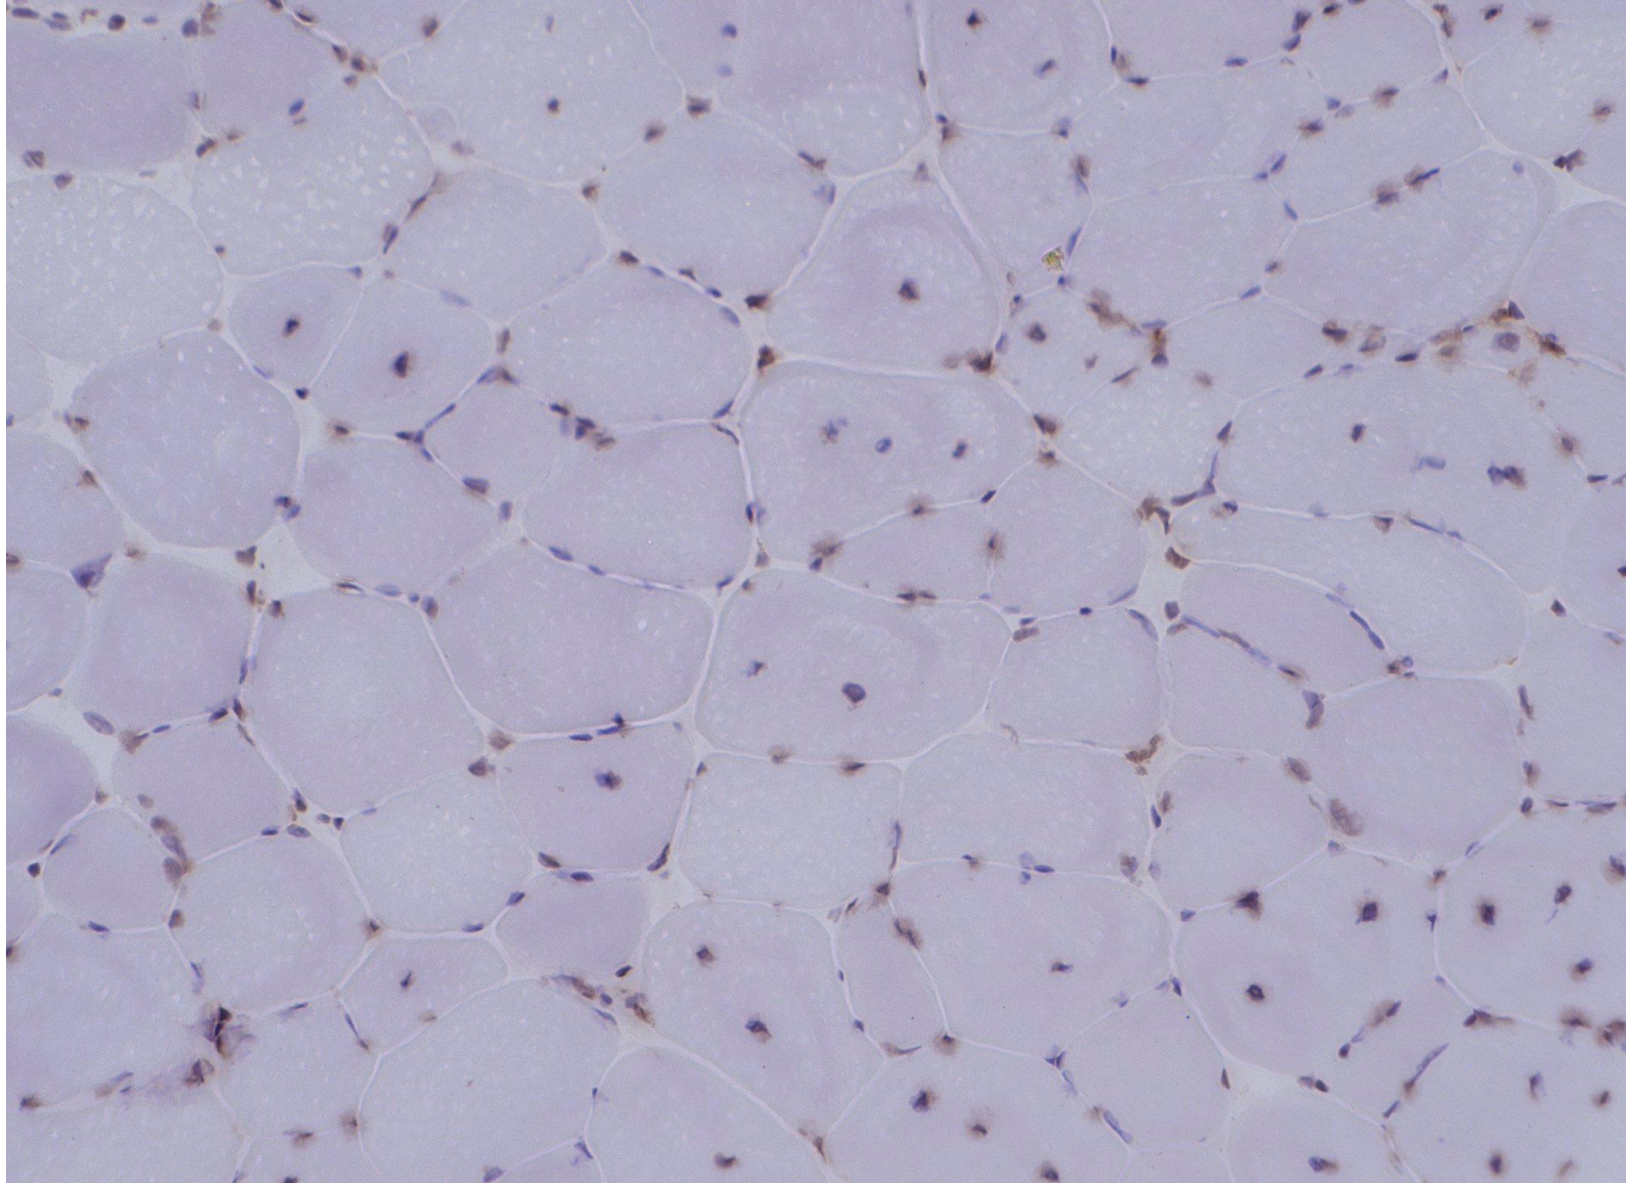

Figure 7B

12 mo BLA/J GM – CD68

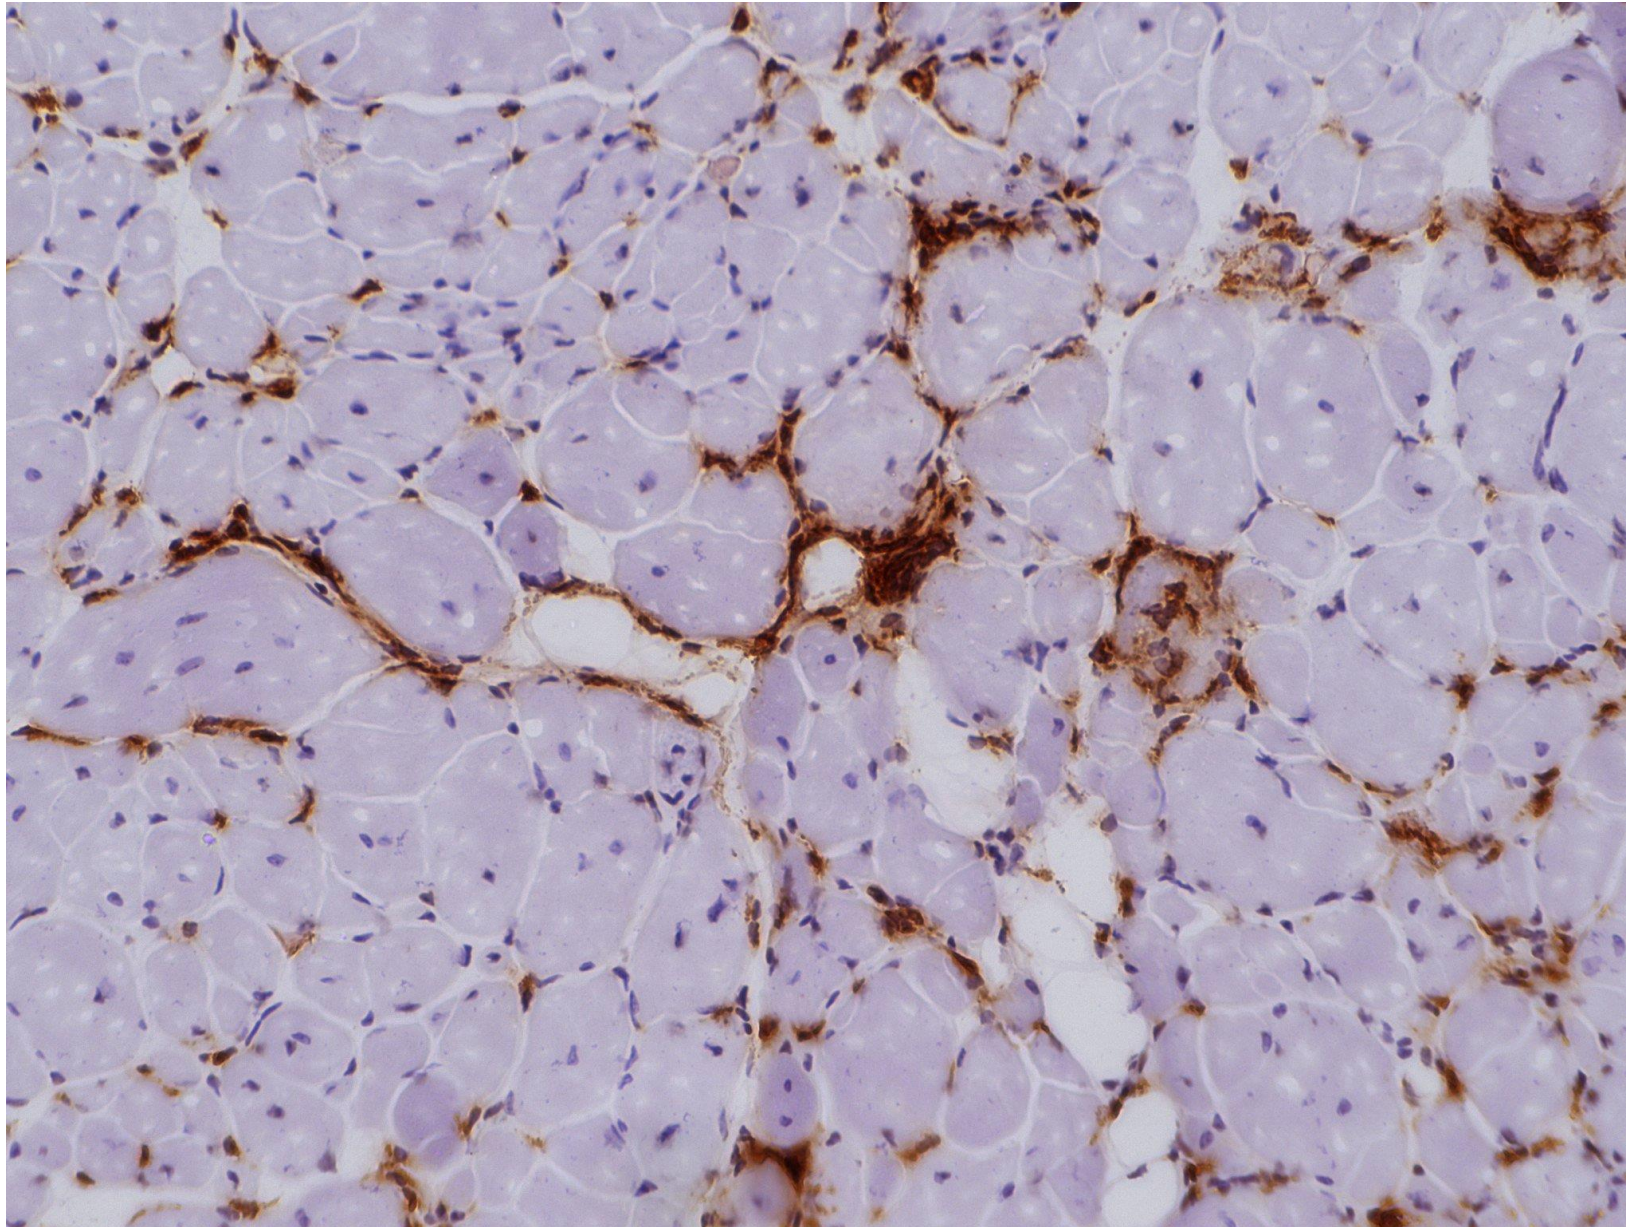

Figure 7B

12 mo BLA/J GM – F4/80

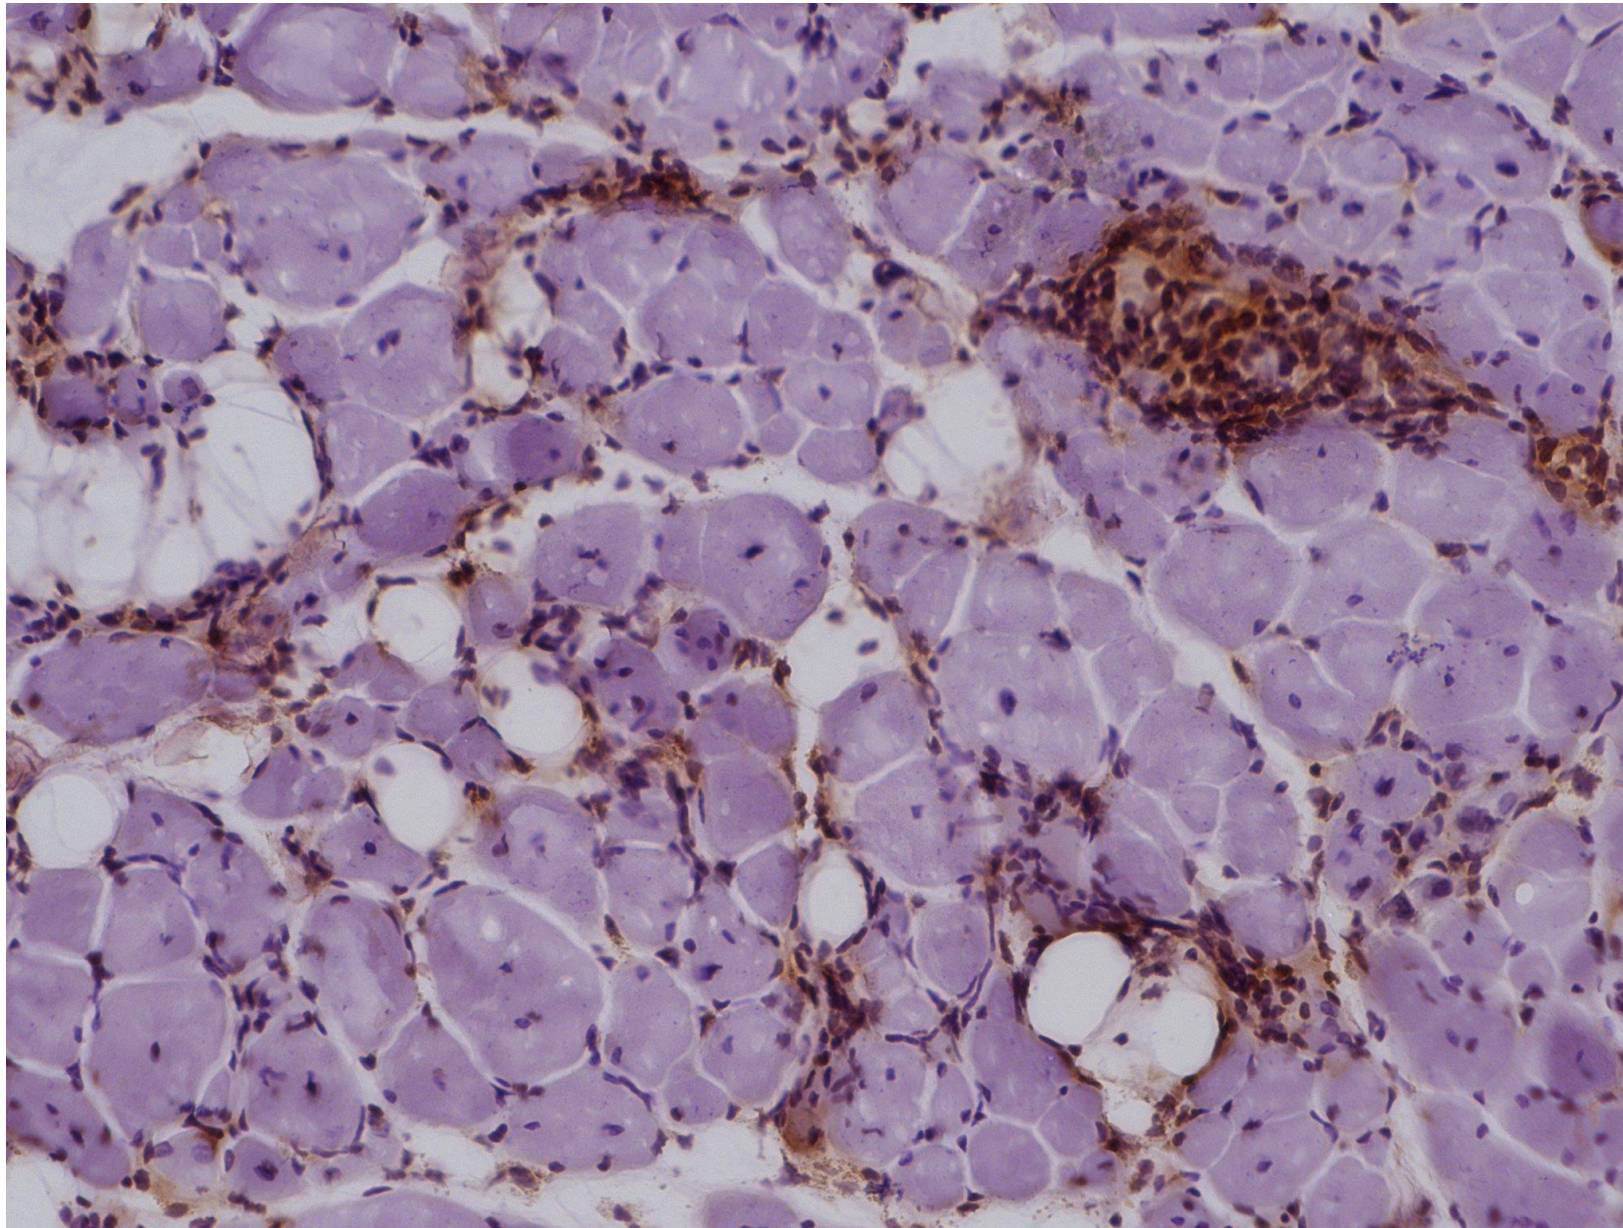

Figure S1A

CTx d0 - CD68

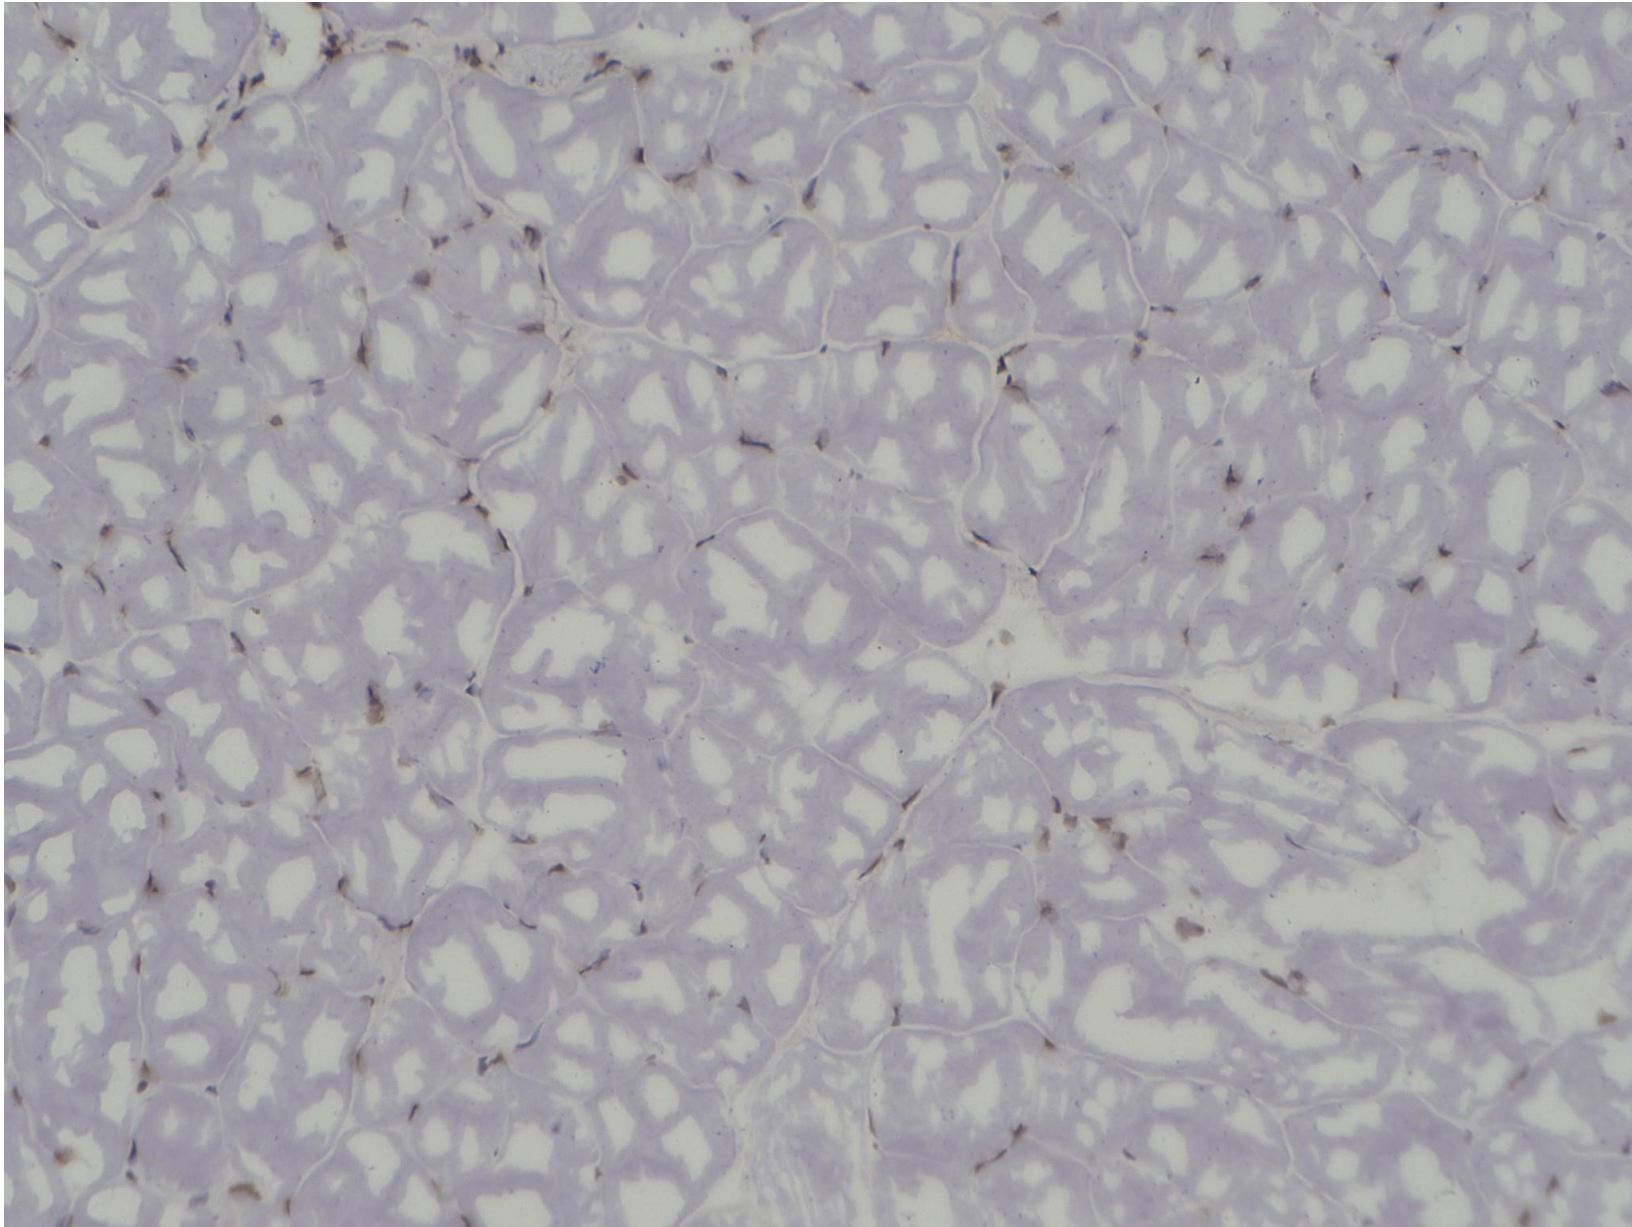

Figure S1A

CTx d0 – F4/80

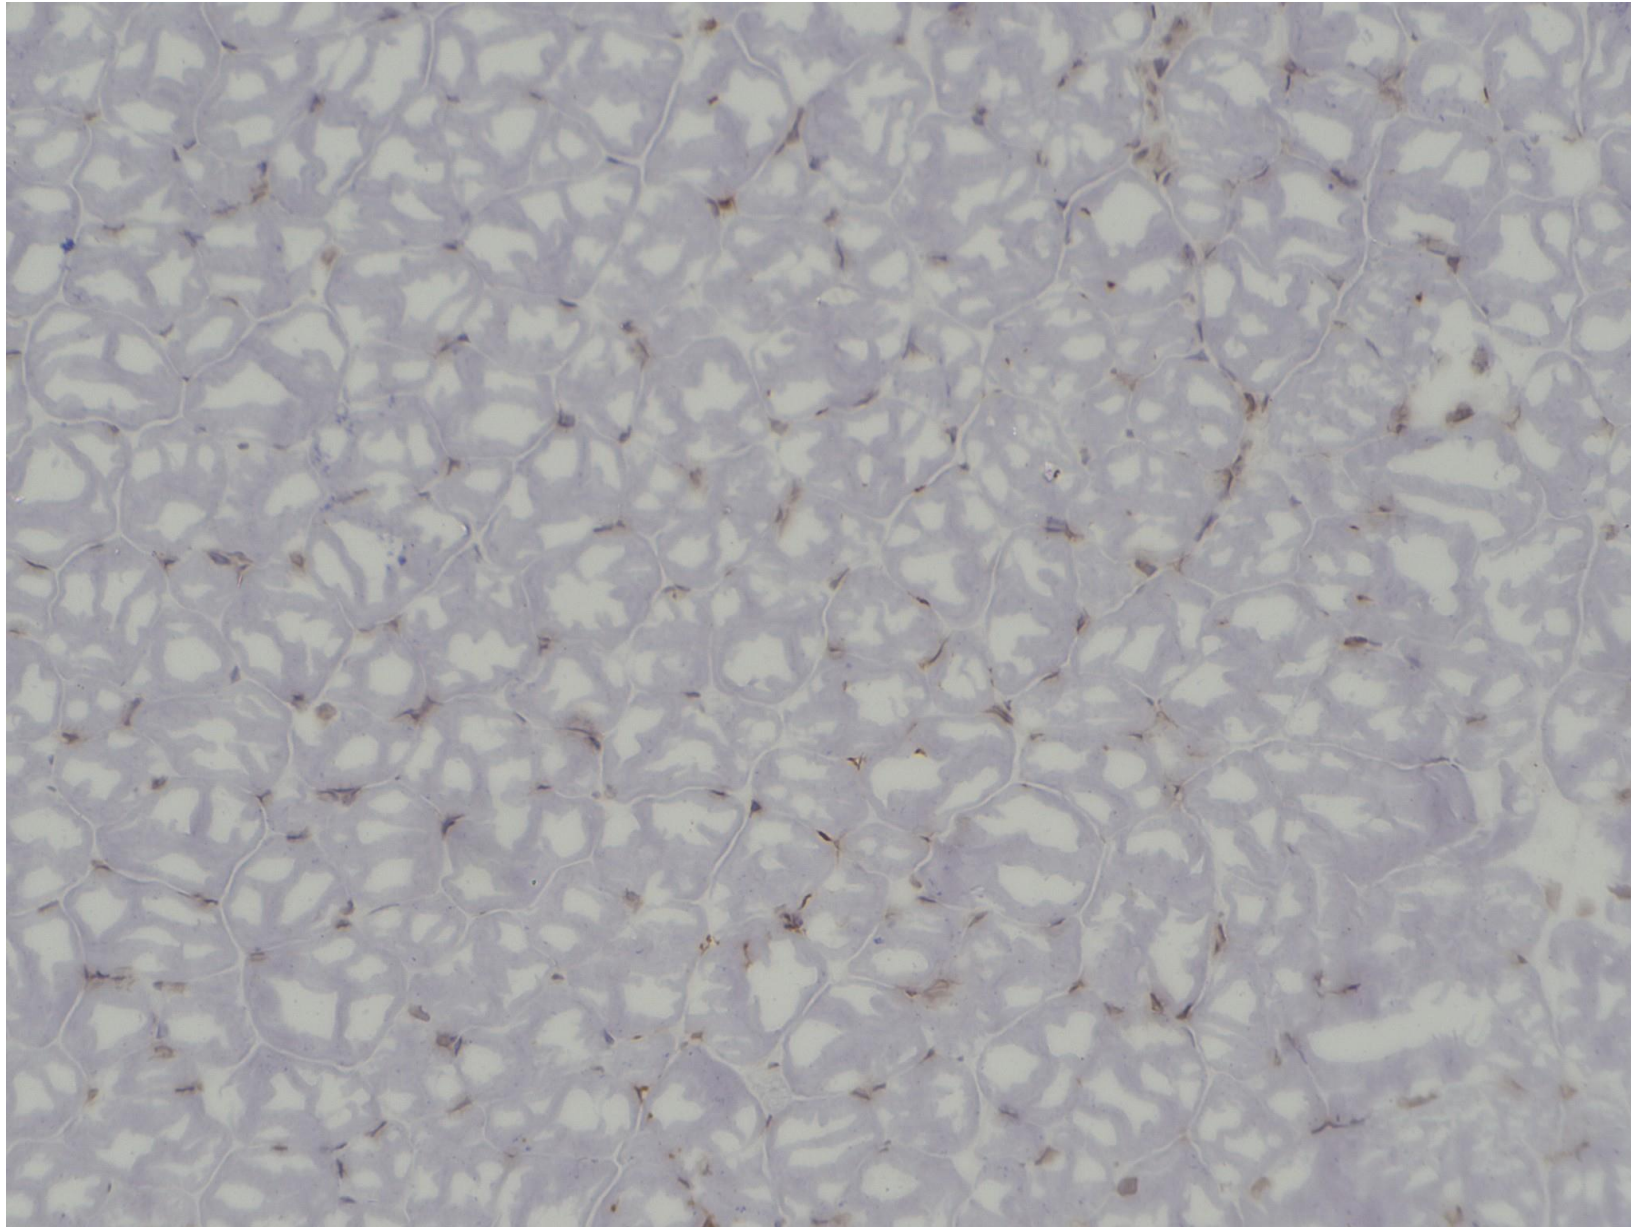

Figure S1A

CTx d3 - CD68

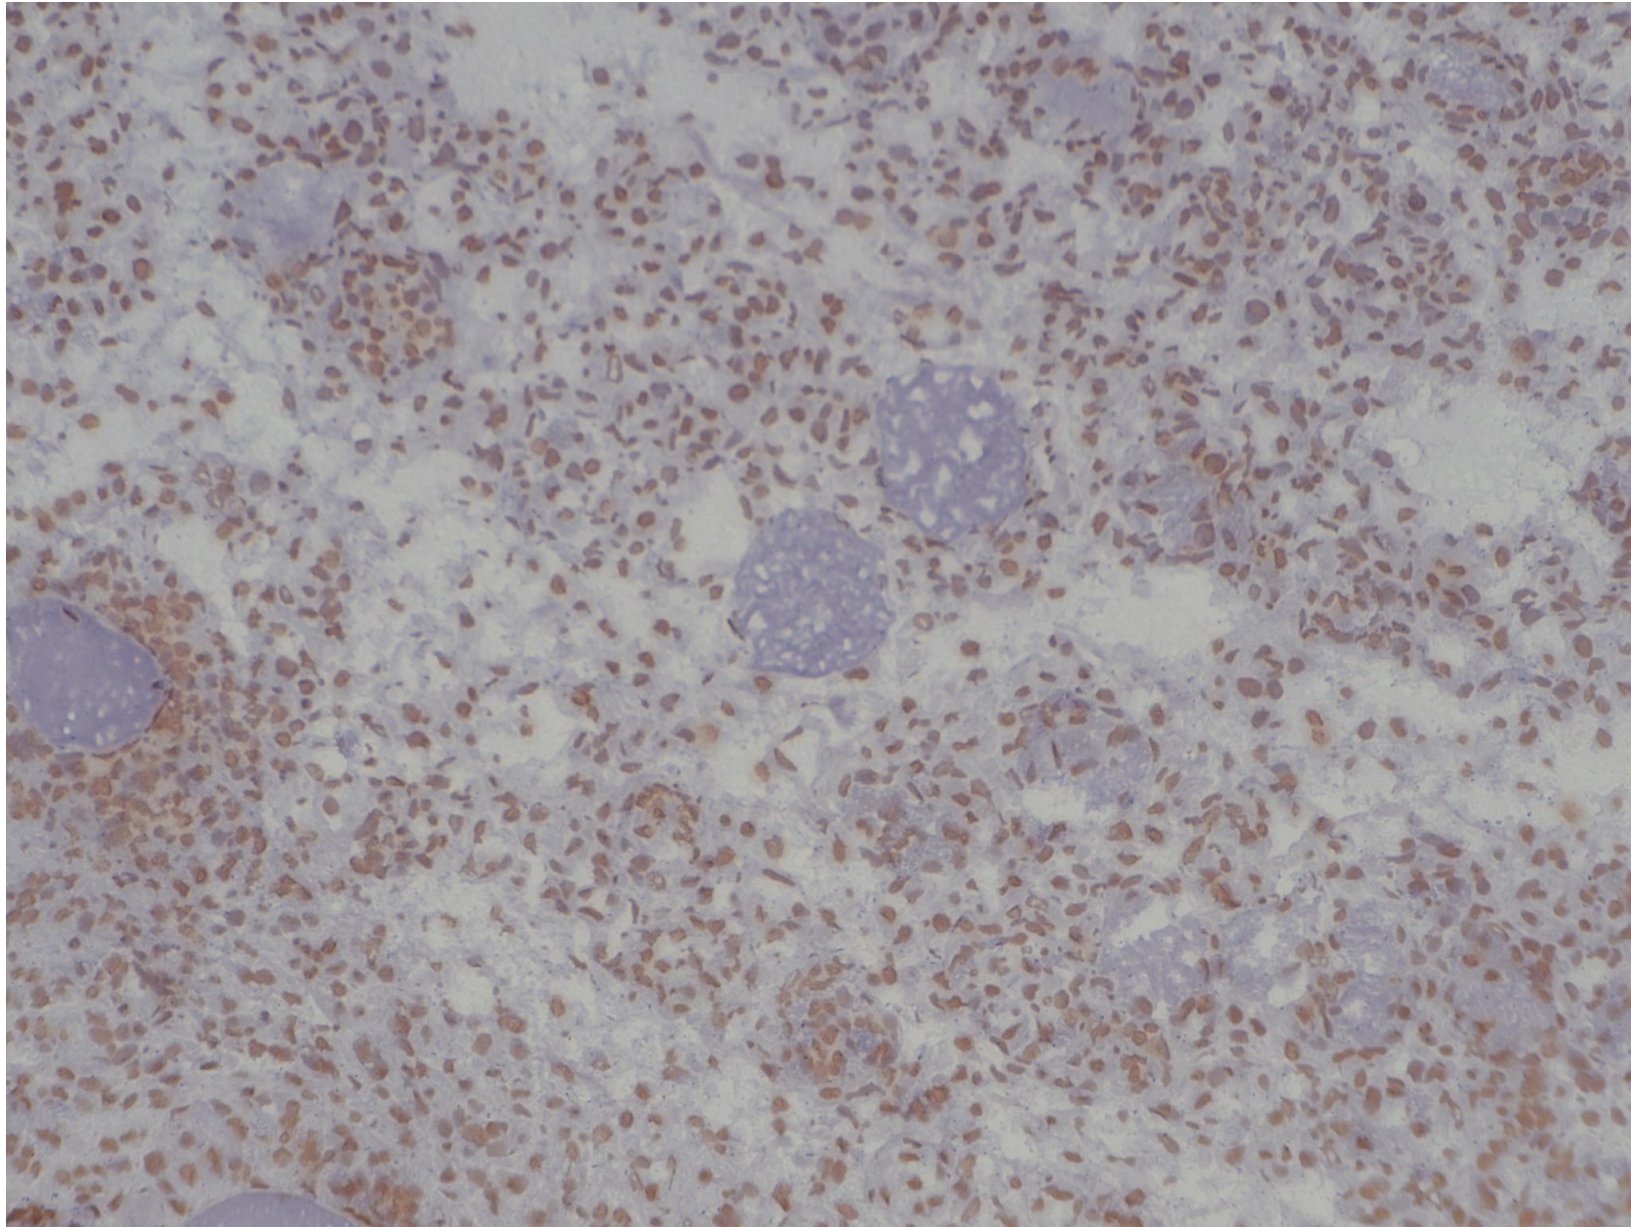

Figure S1A

CTx d3 – F4/80

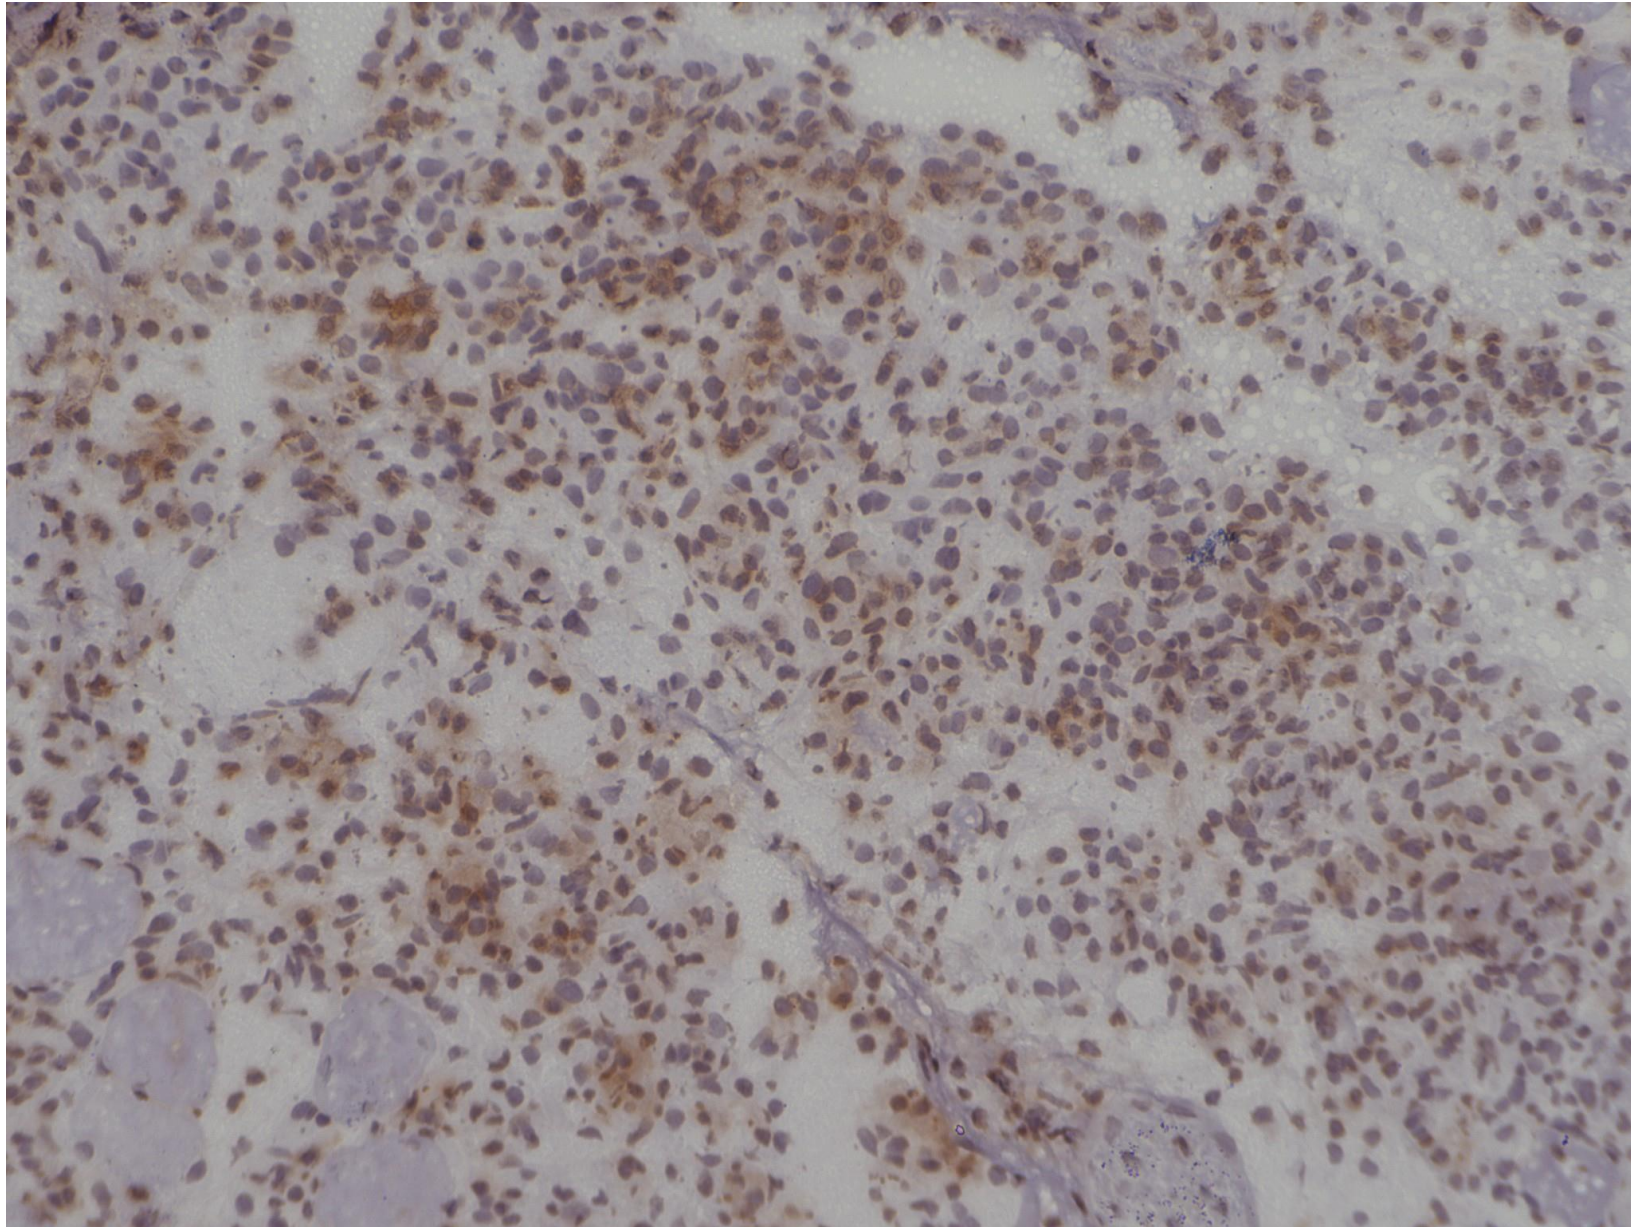

Figure S1A

CTx d4 - CD68

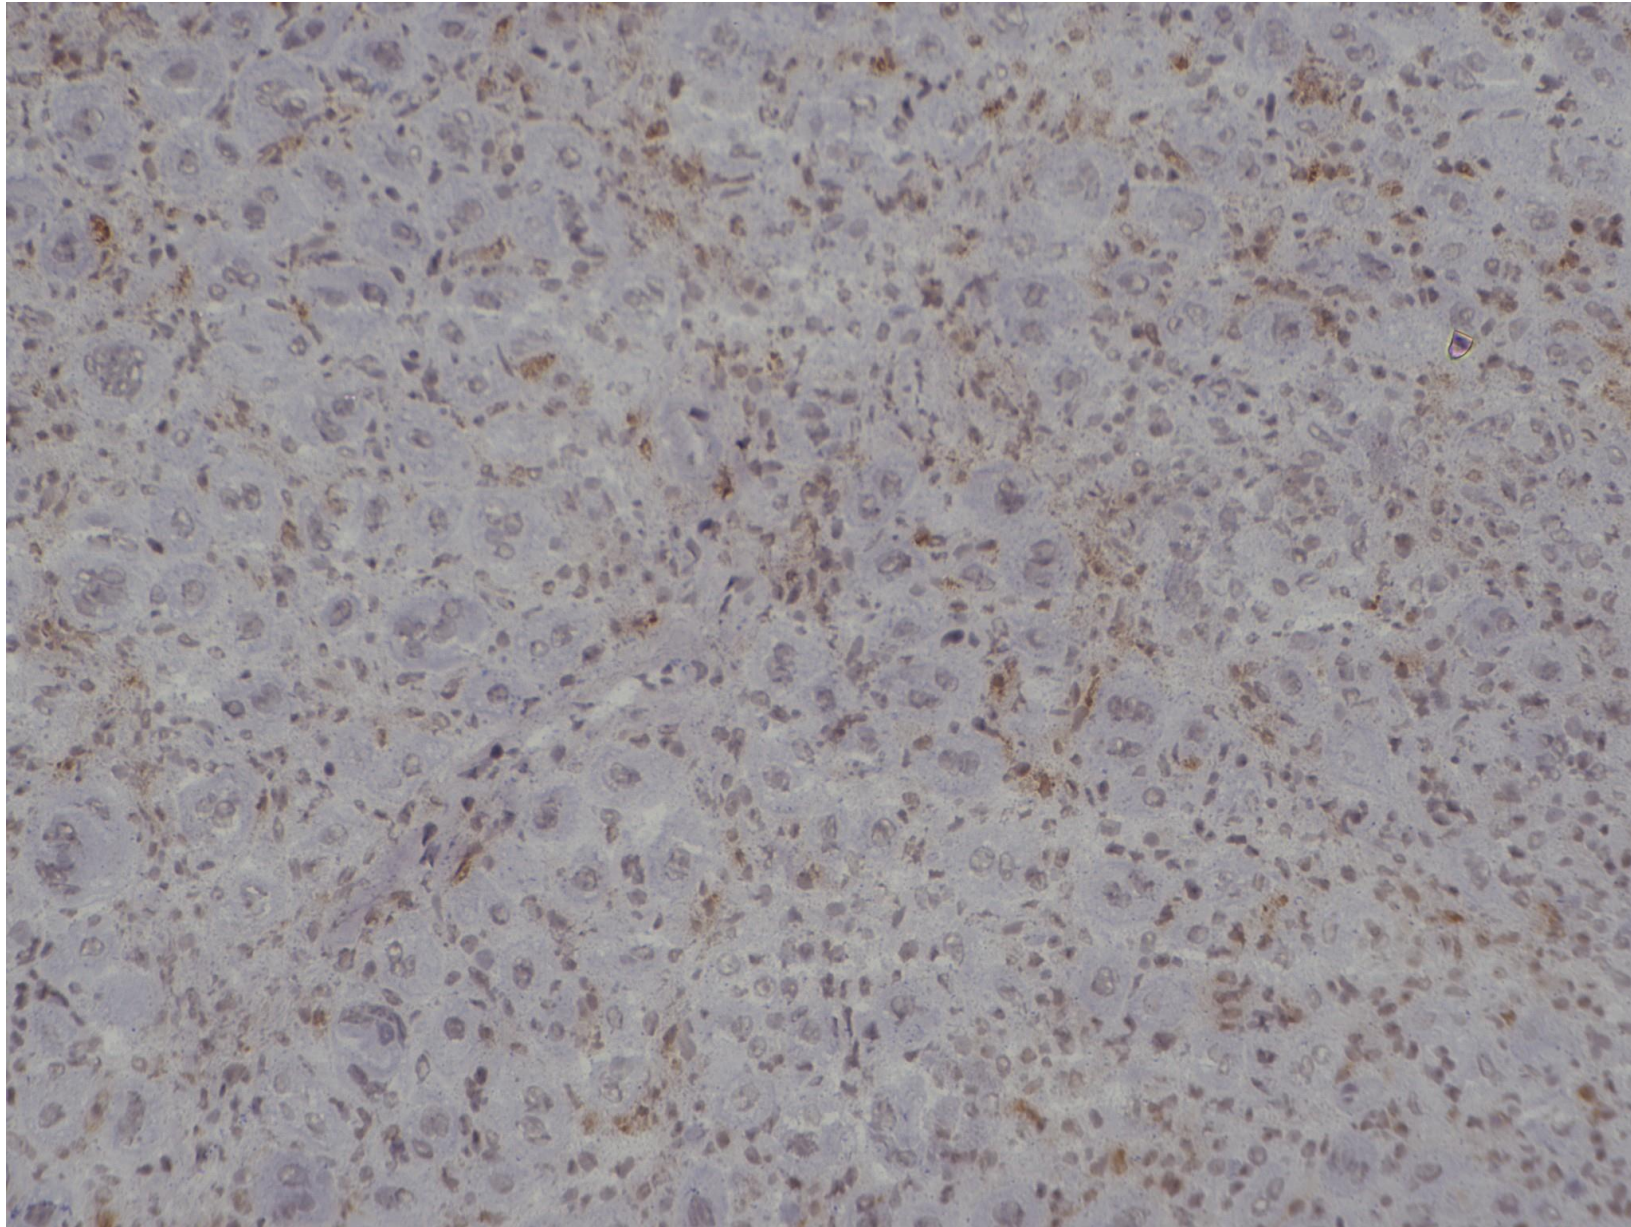

Figure S1A

CTx d4 – F4/80

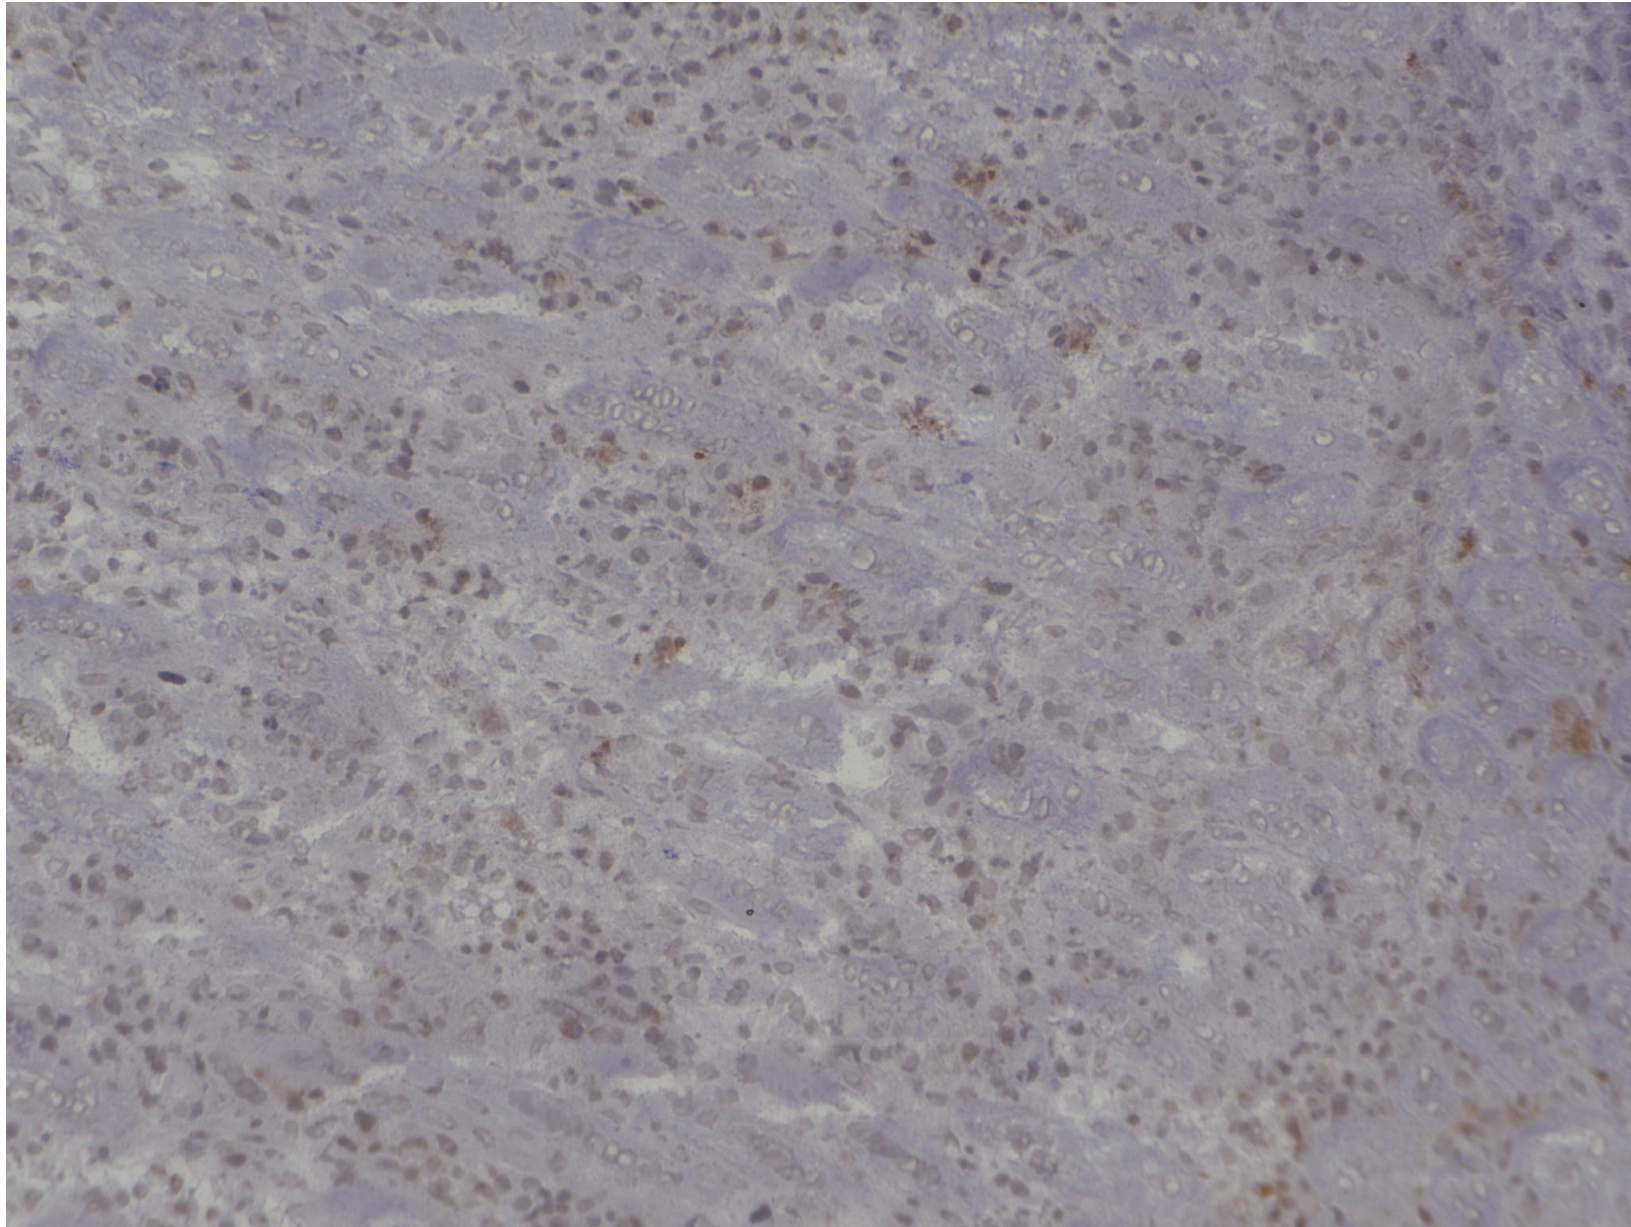

Figure S1A

CTx d5 - CD68

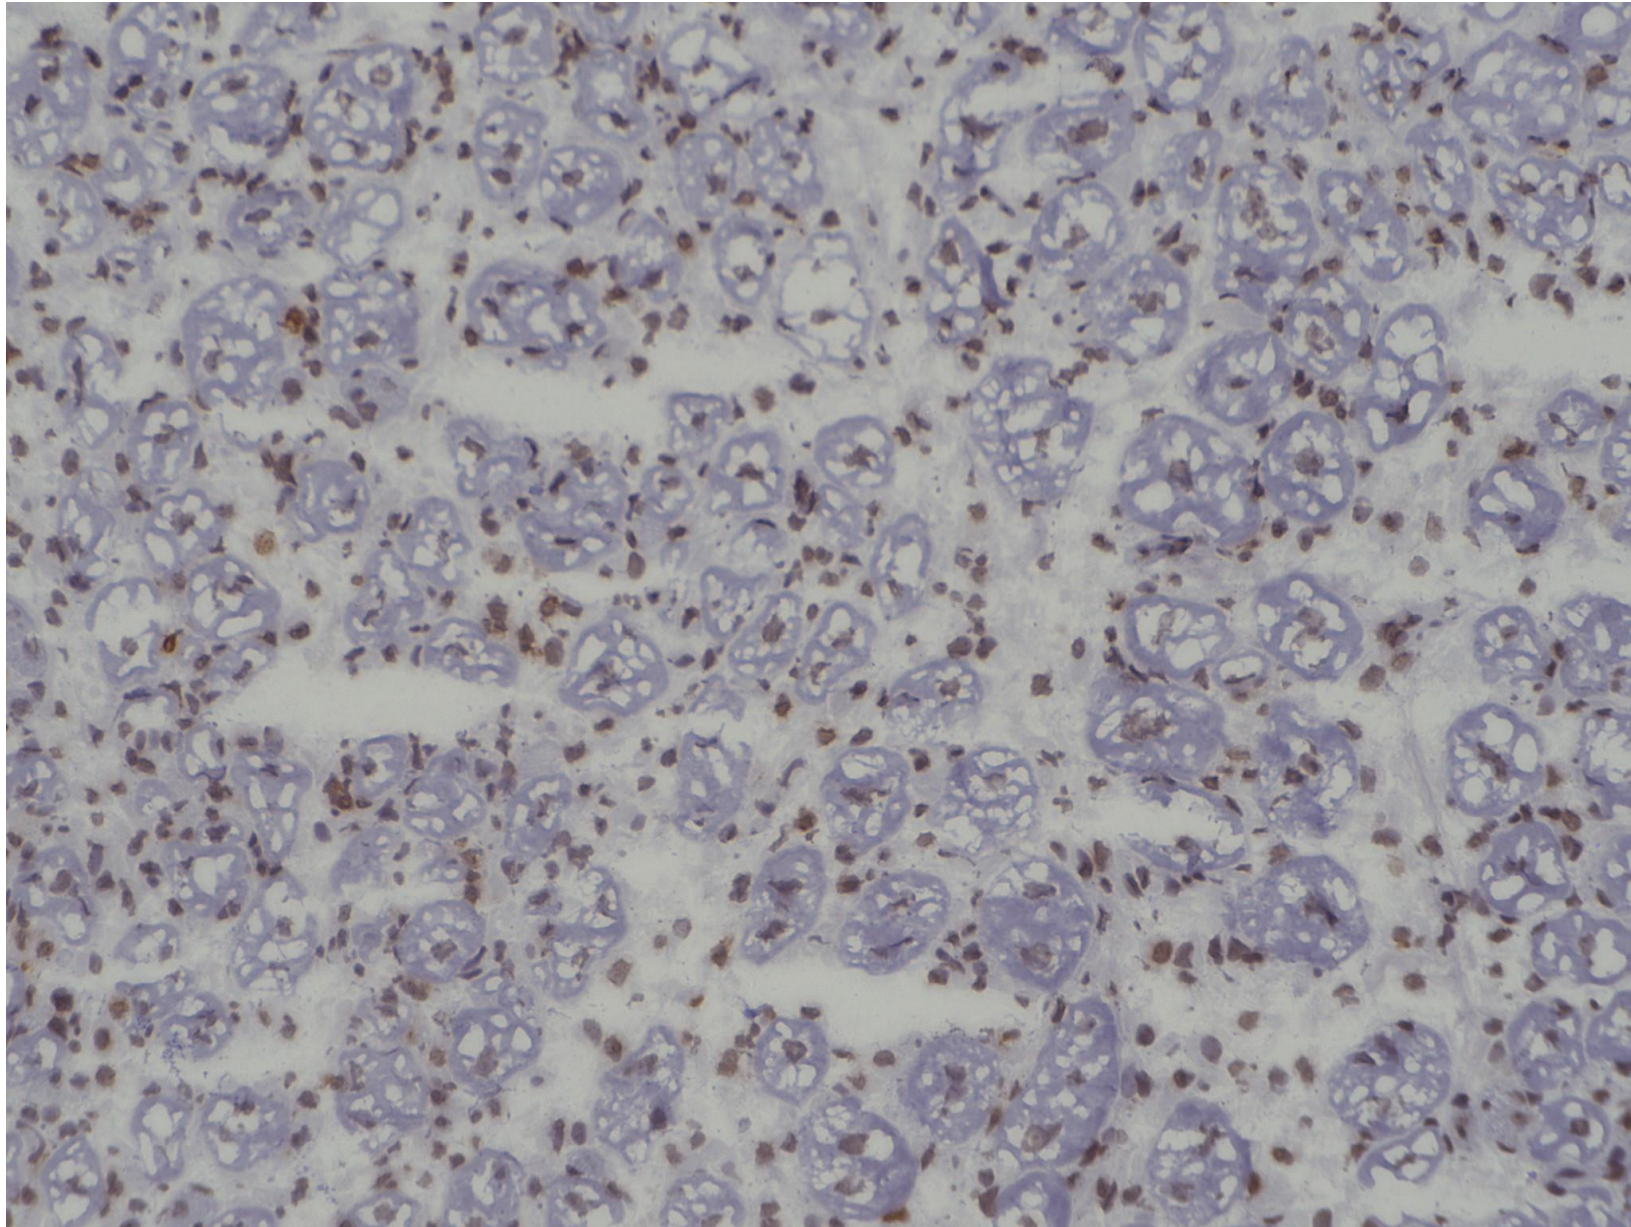

Figure S1A

CTx d5 – F4/80

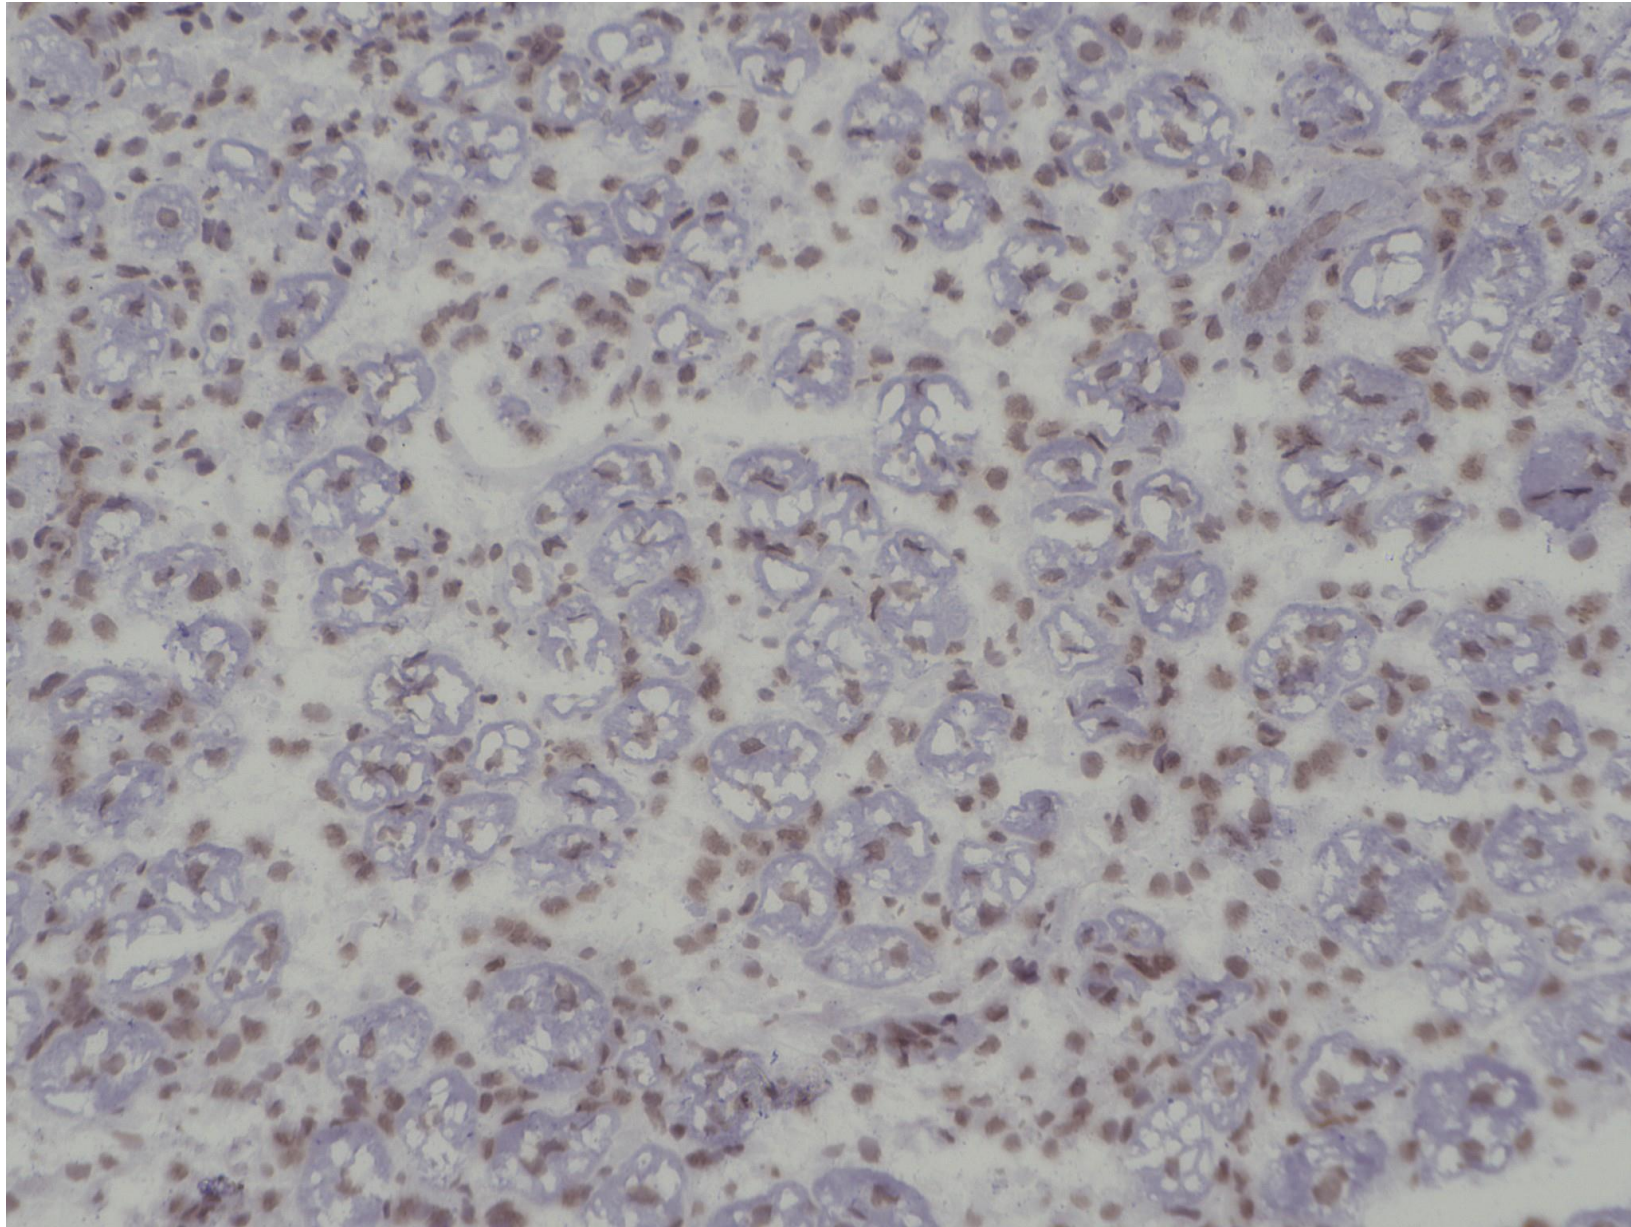

Figure S3A

CTx d0 – DAPI

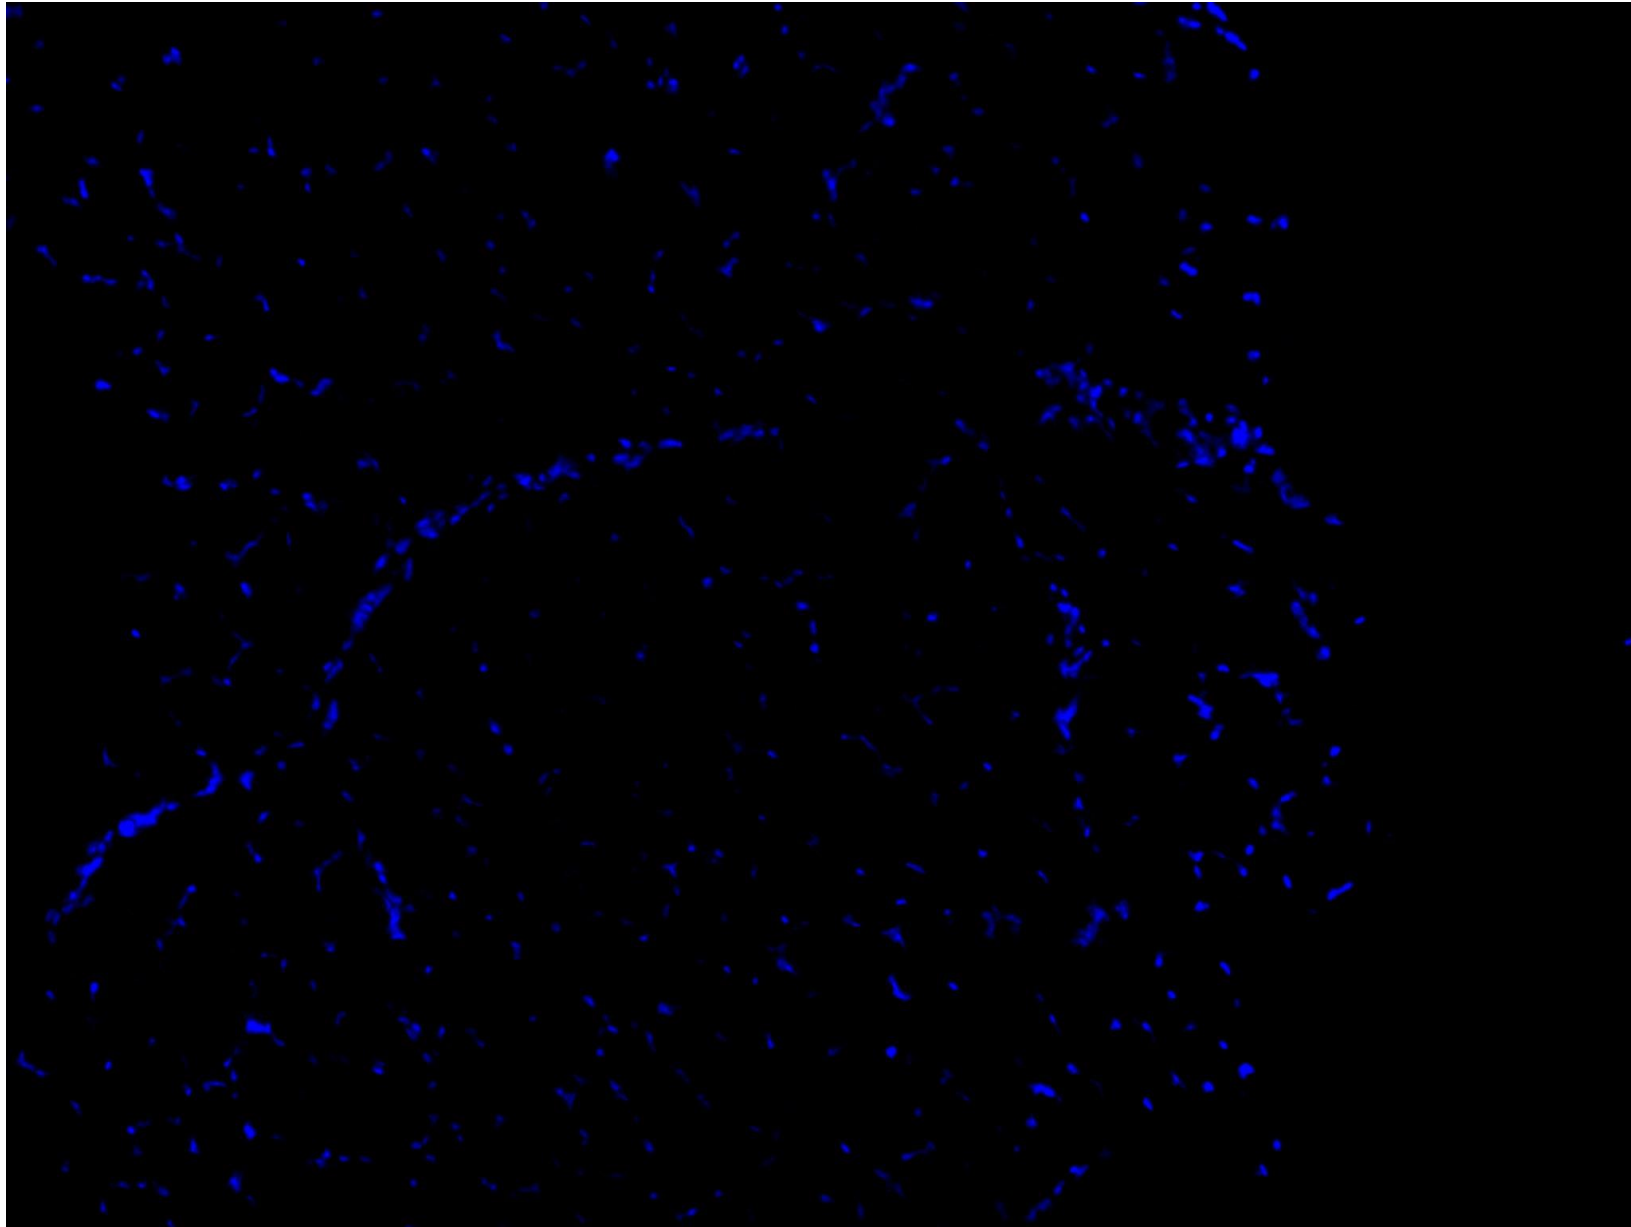

Figure S3A

CTx d0 – alpha-SMA

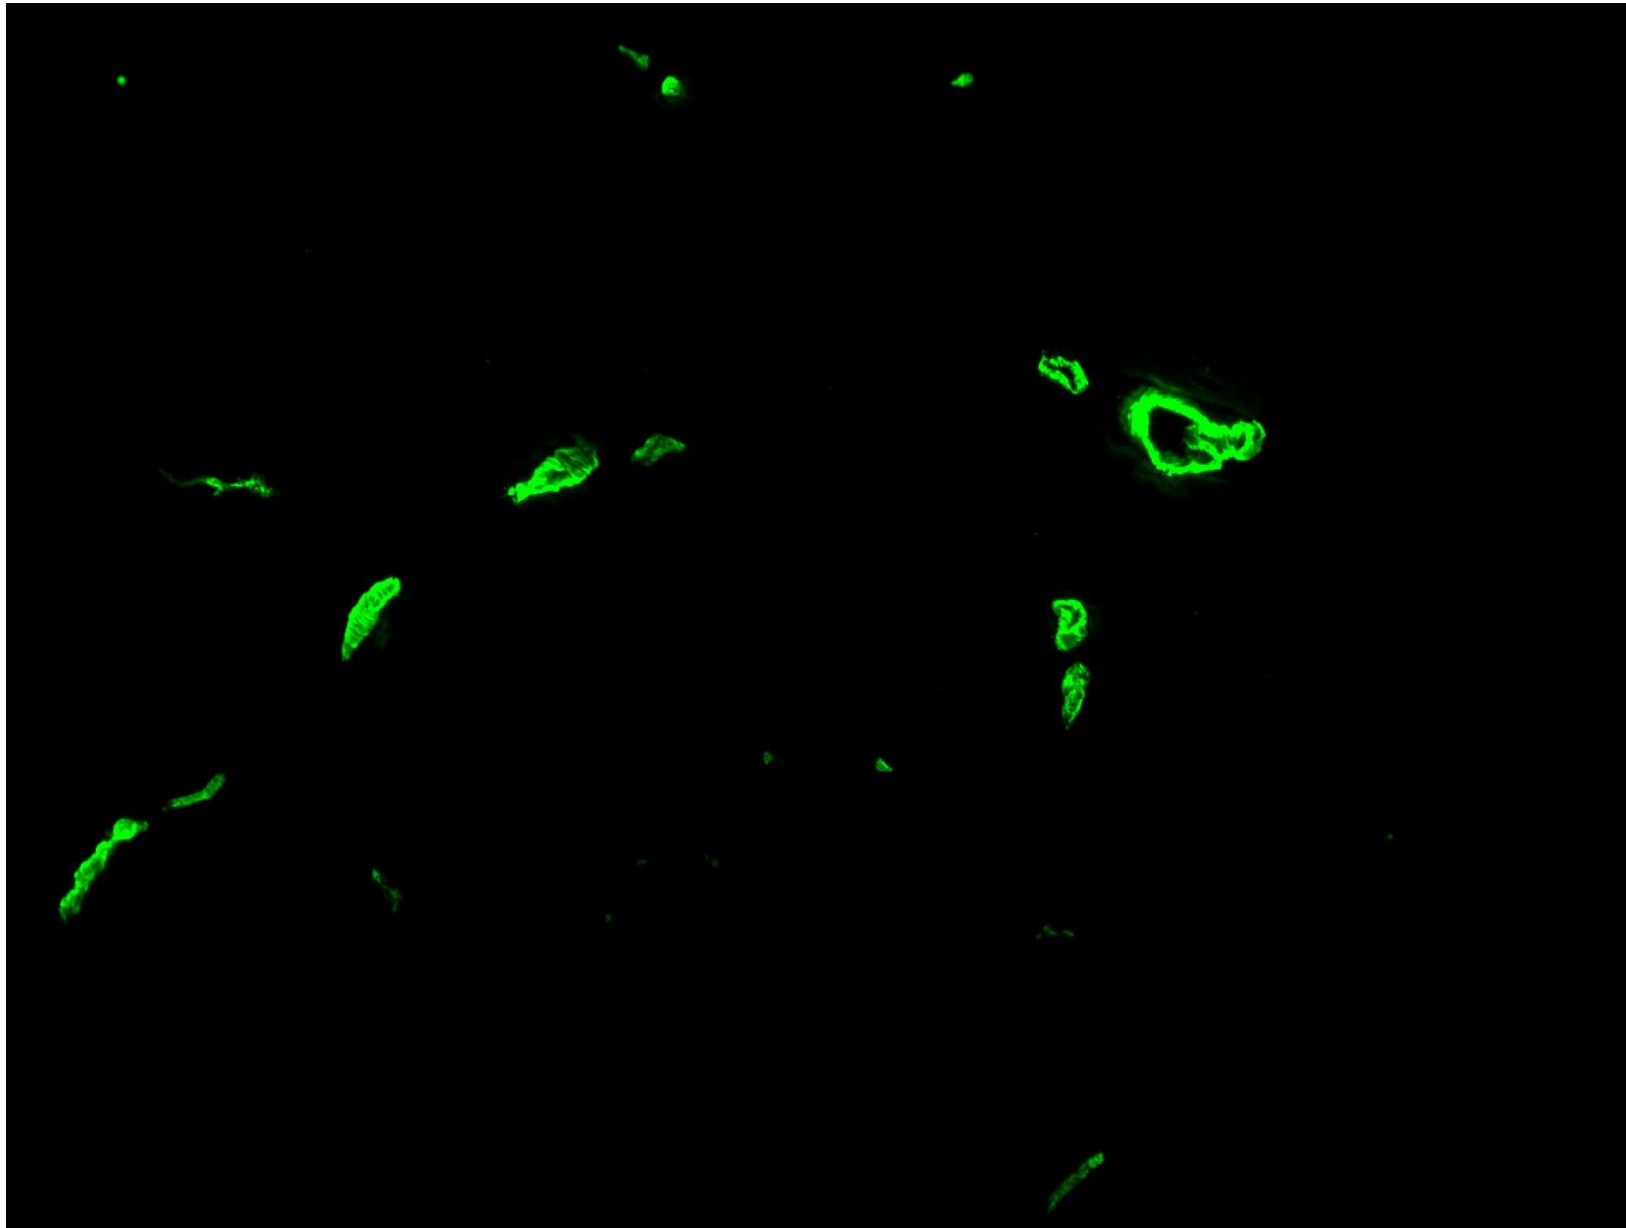

Figure S3A

CTx d0 – CD11b

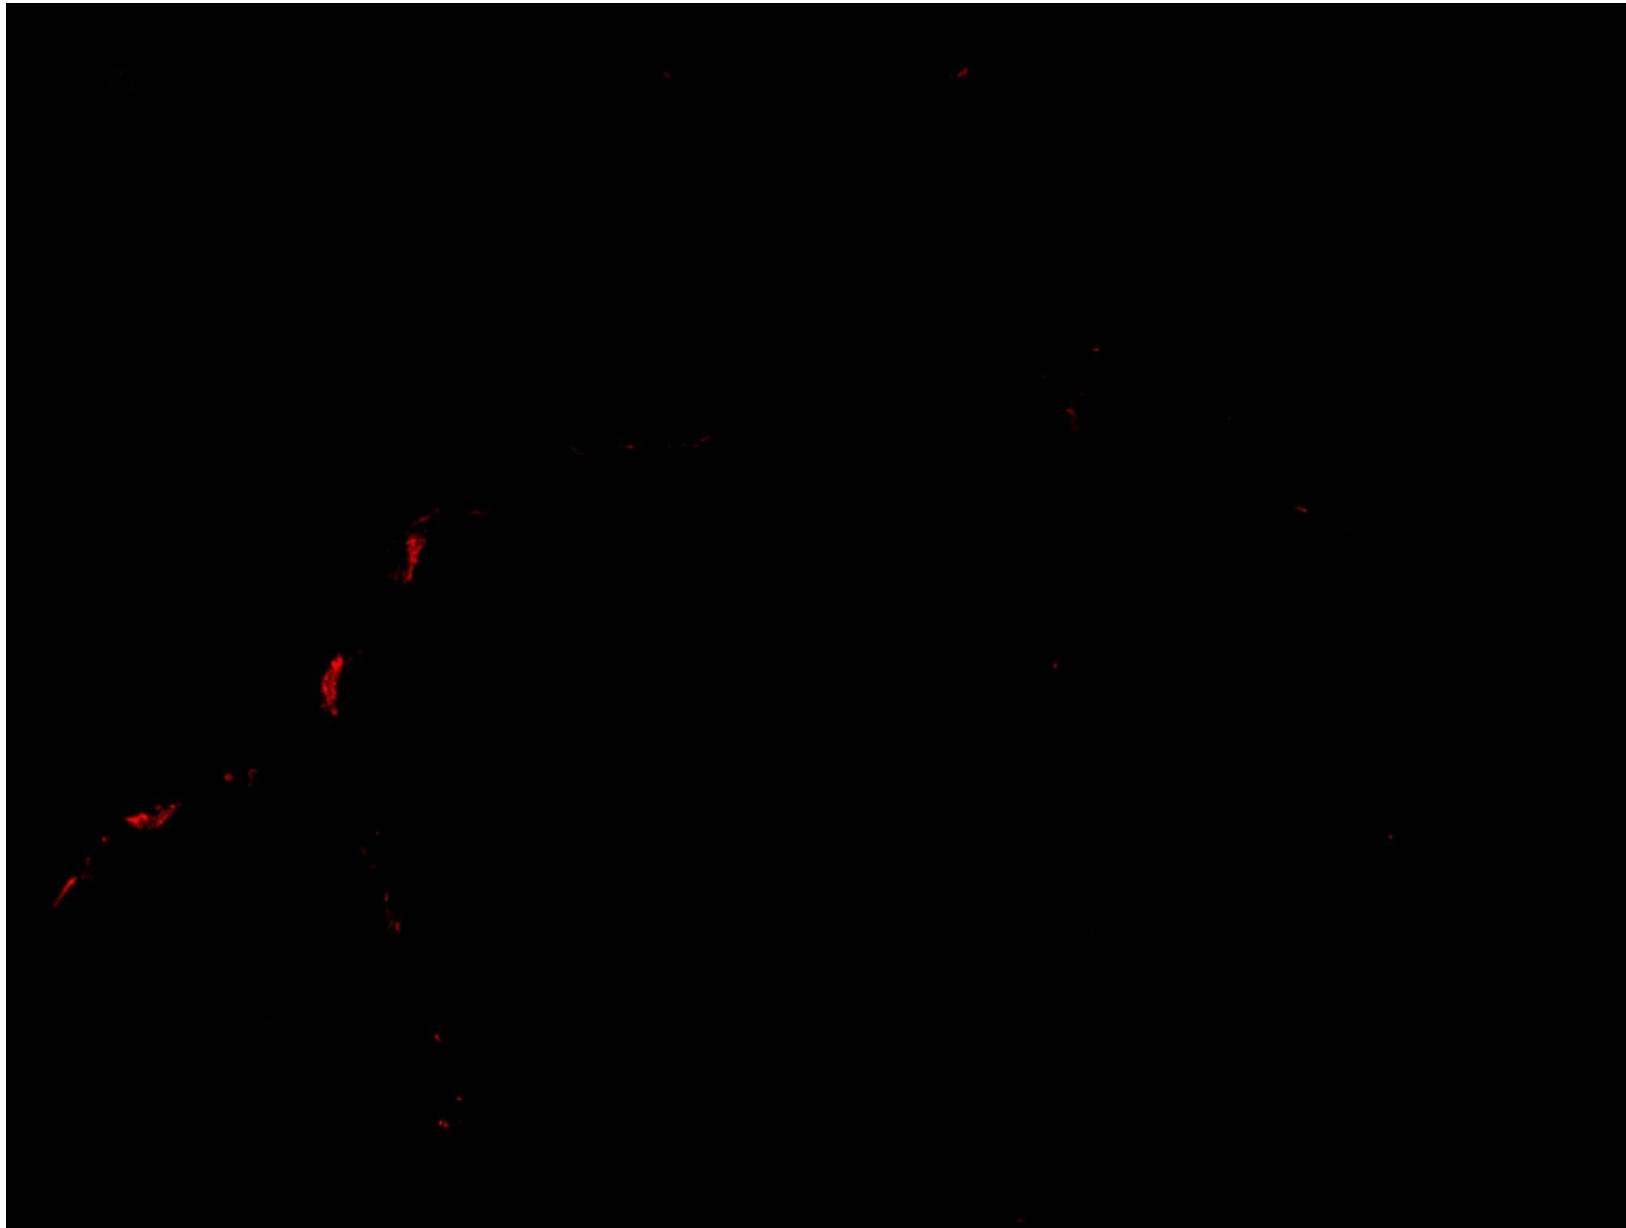

Figure S3A

CTx d0 – CD163

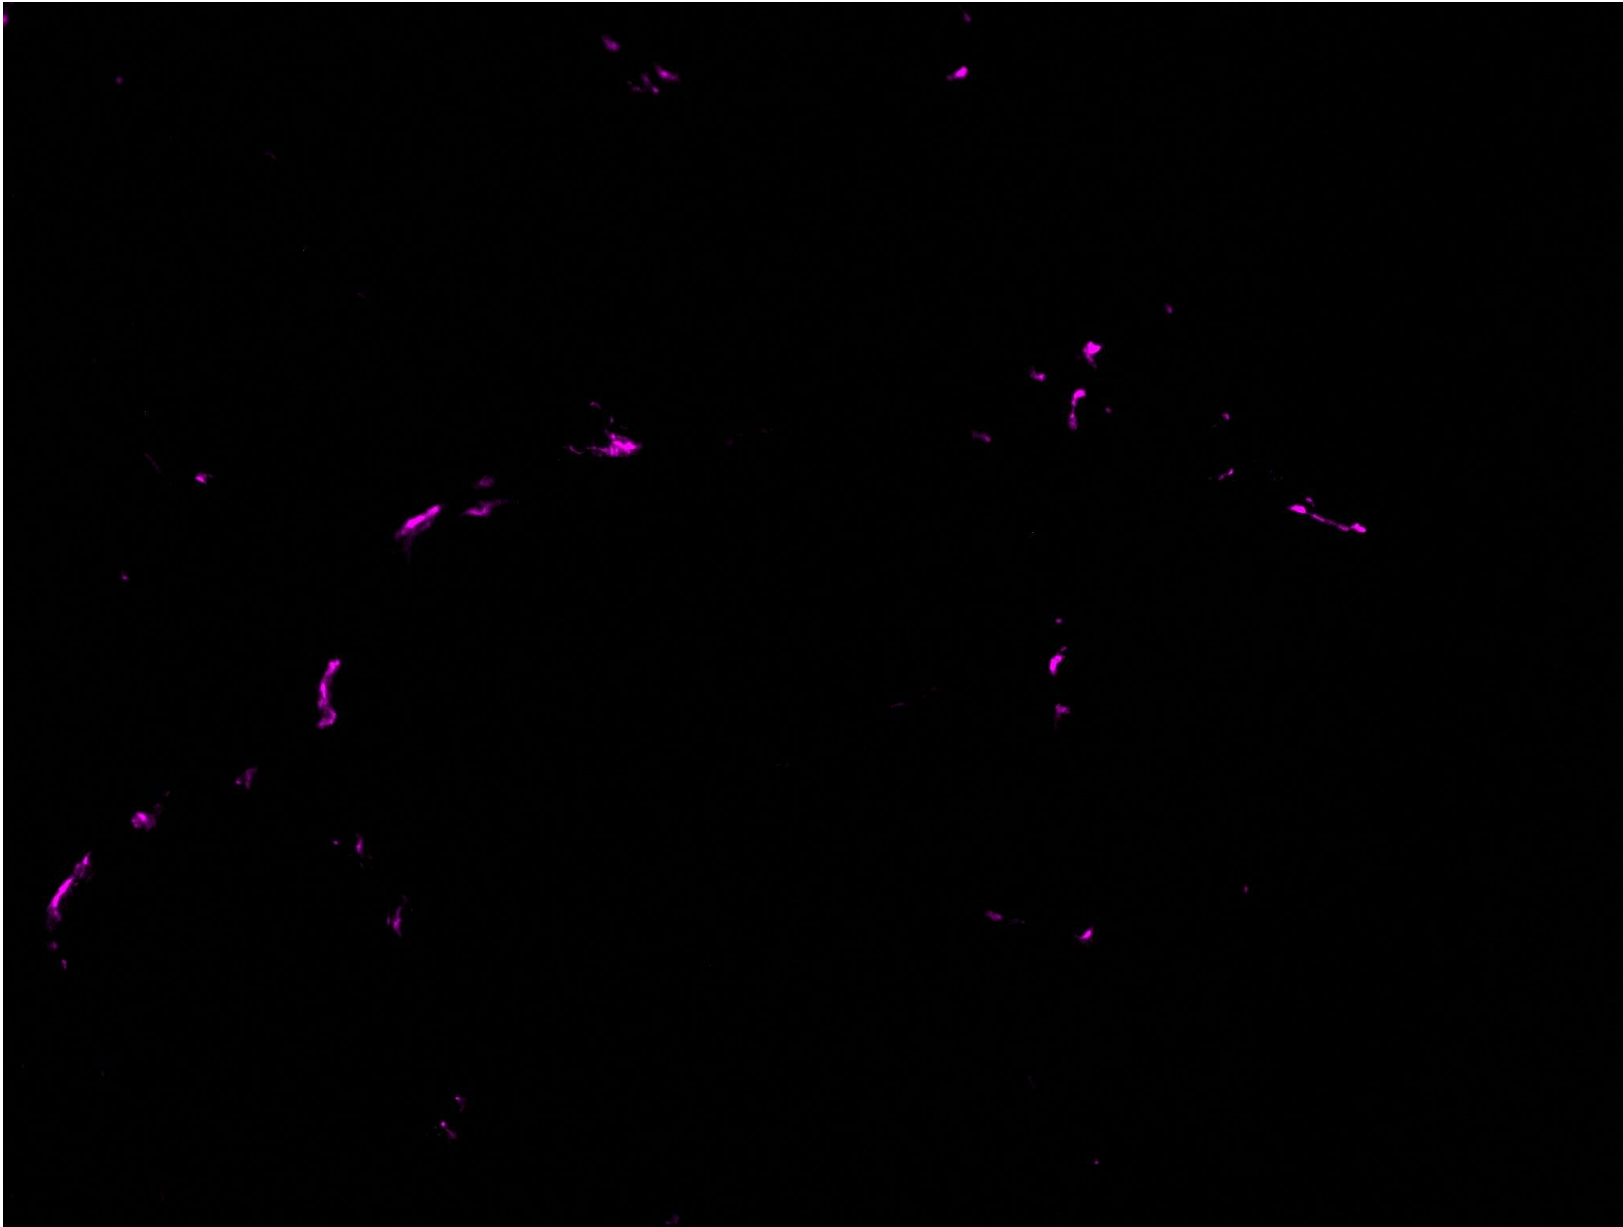

Figure S3B

CTx d3 – DAPI

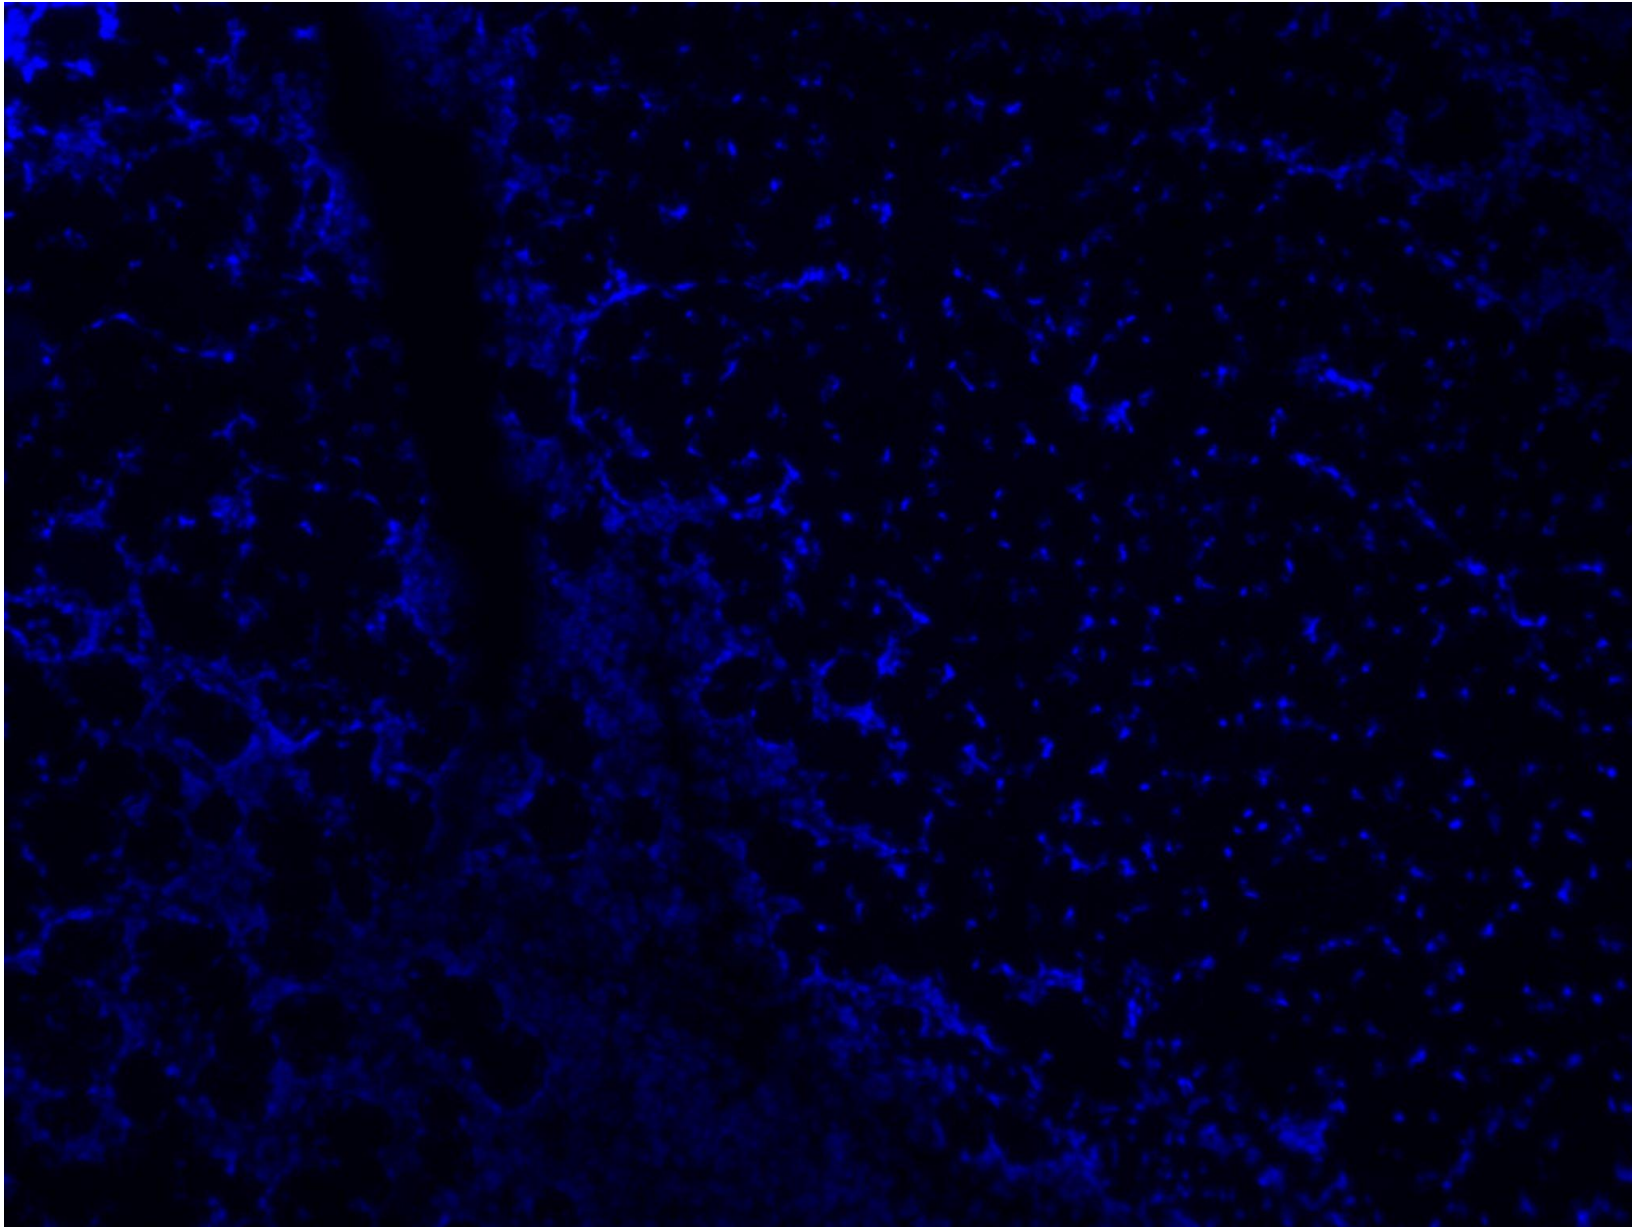

Figure S3B

CTx d3 – alpha-SMA

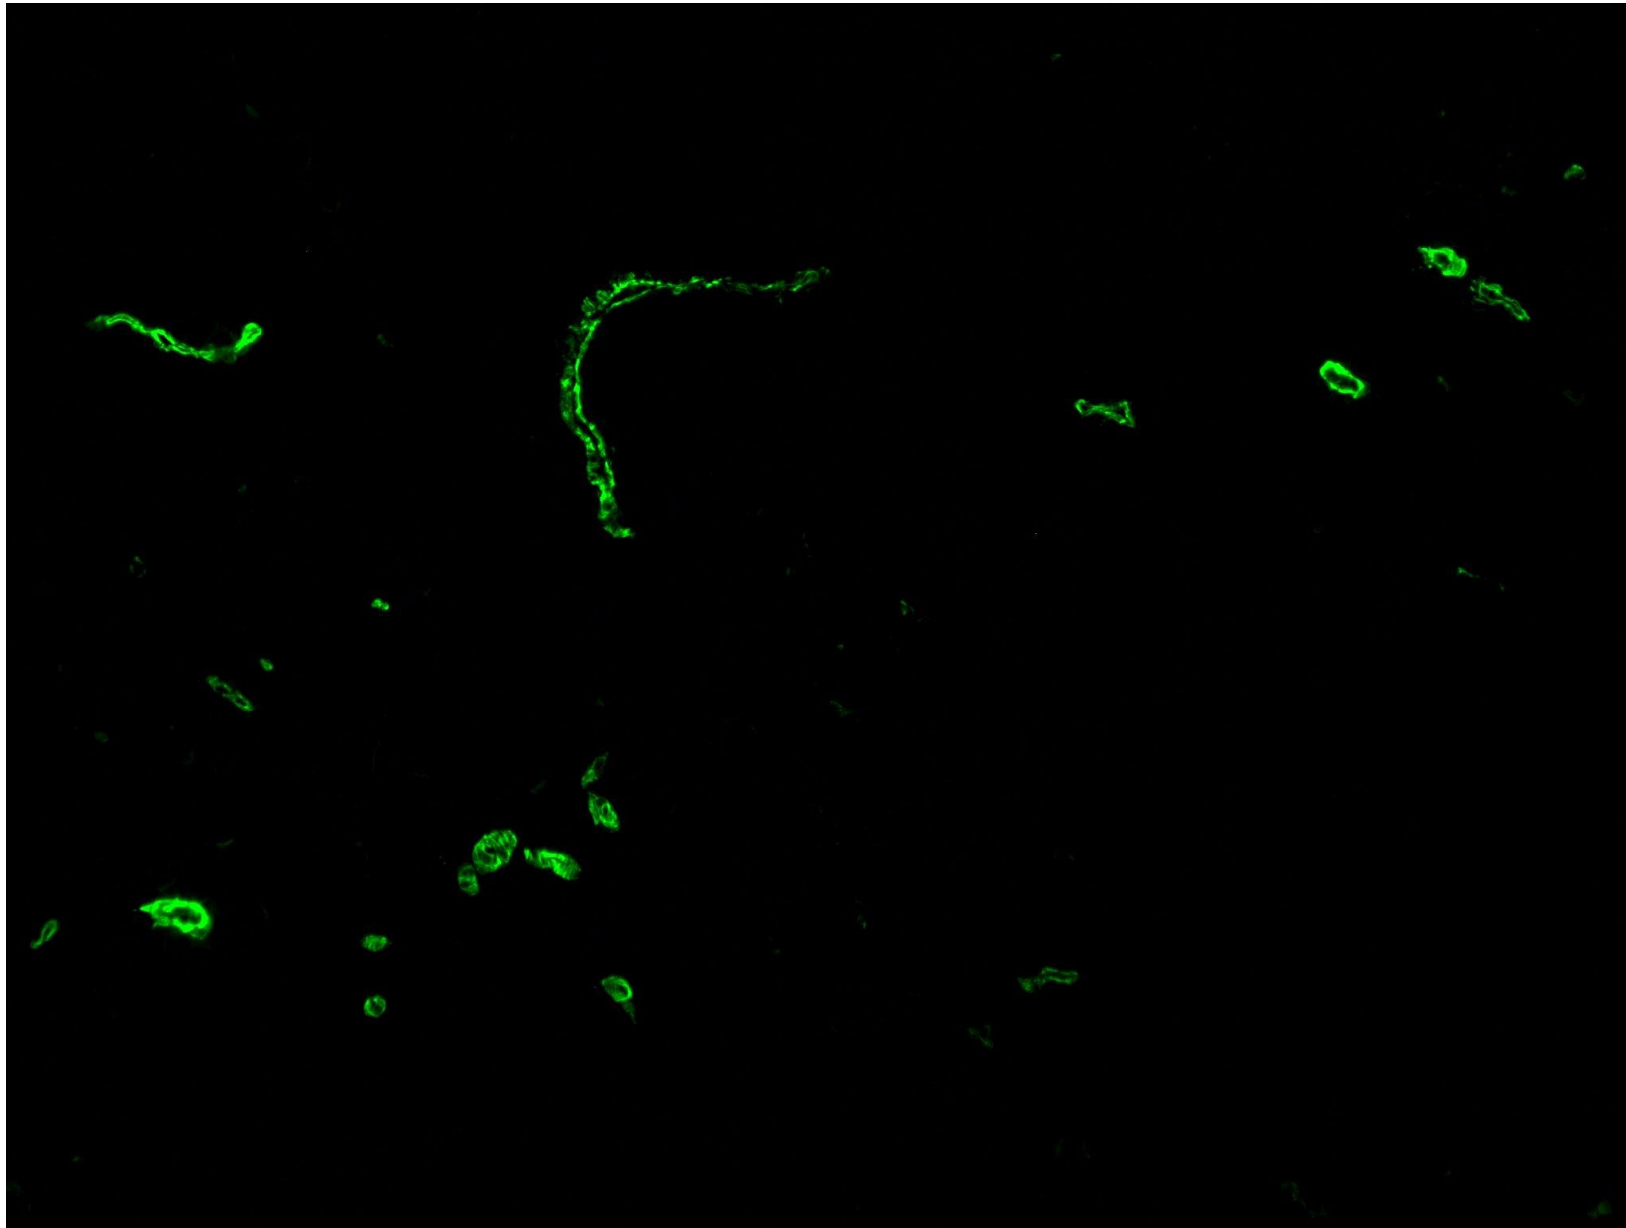

Figure S3B

CTx d3 – CD11b

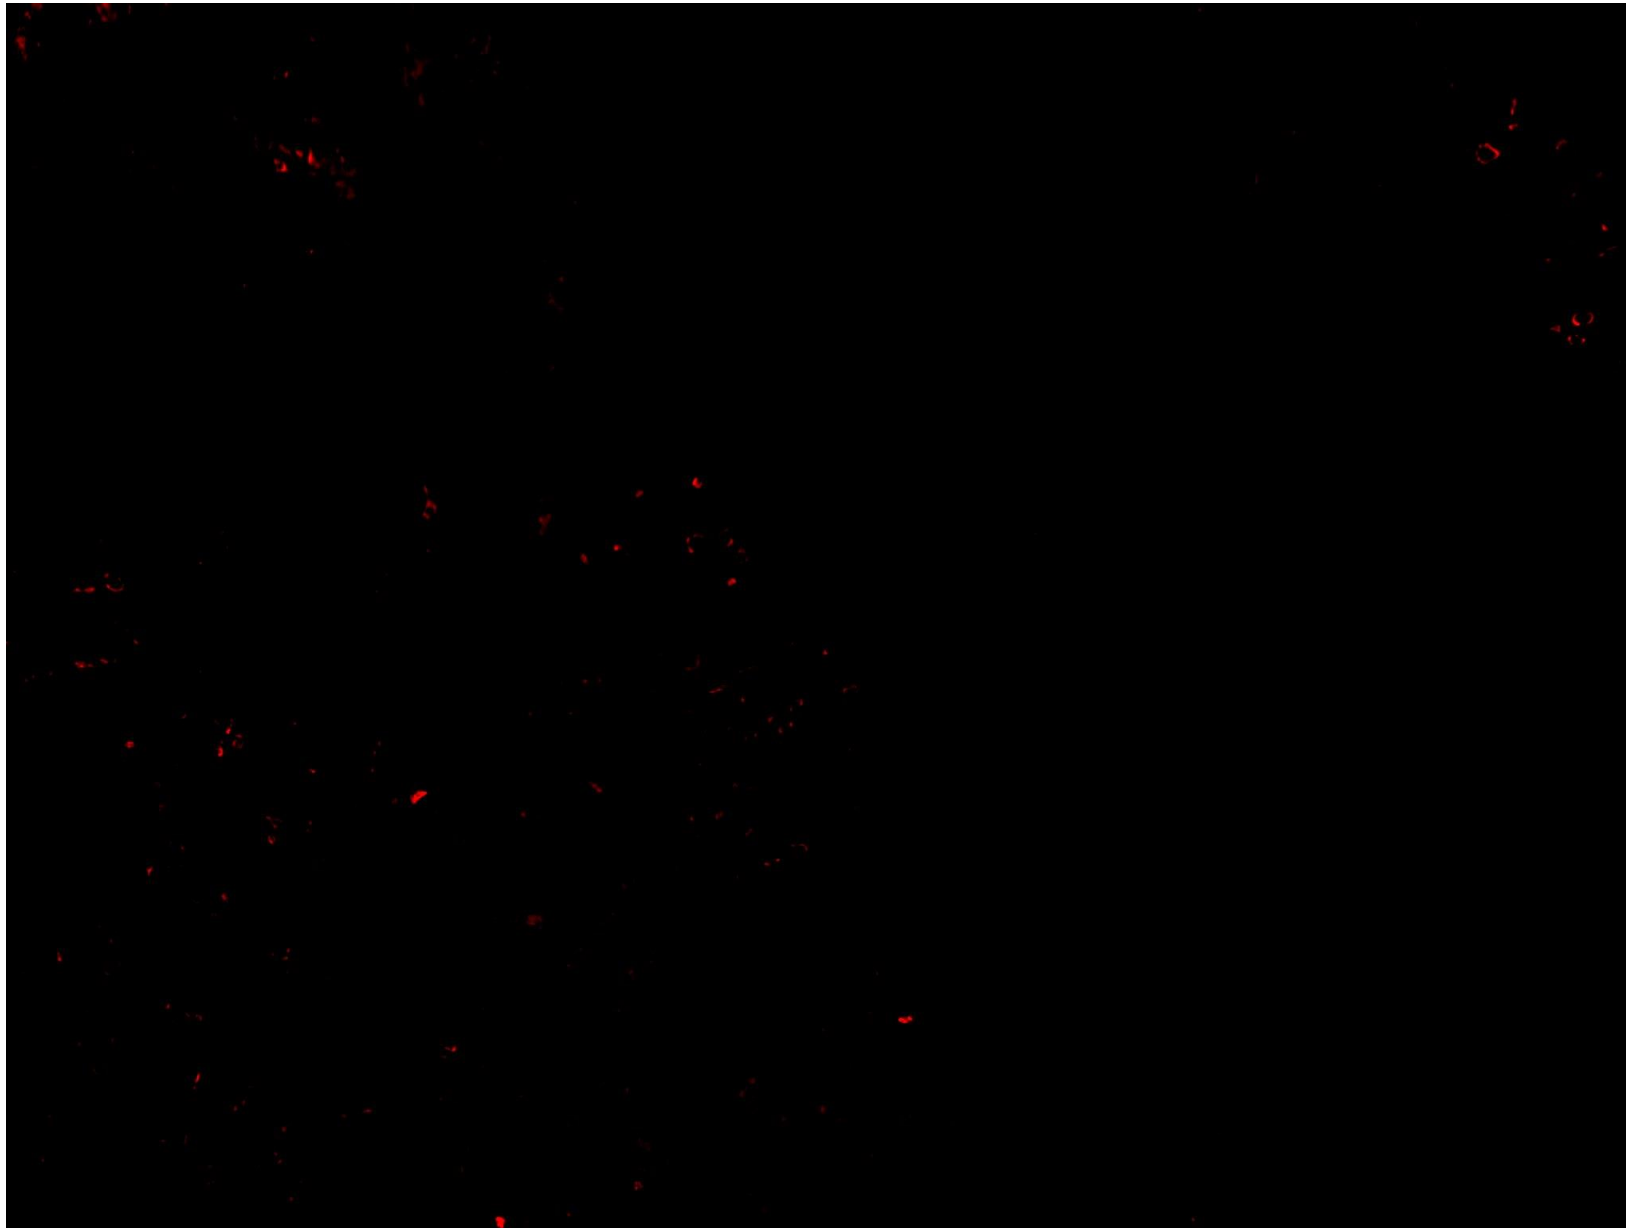

Figure S3B

CTx d3 – CD163

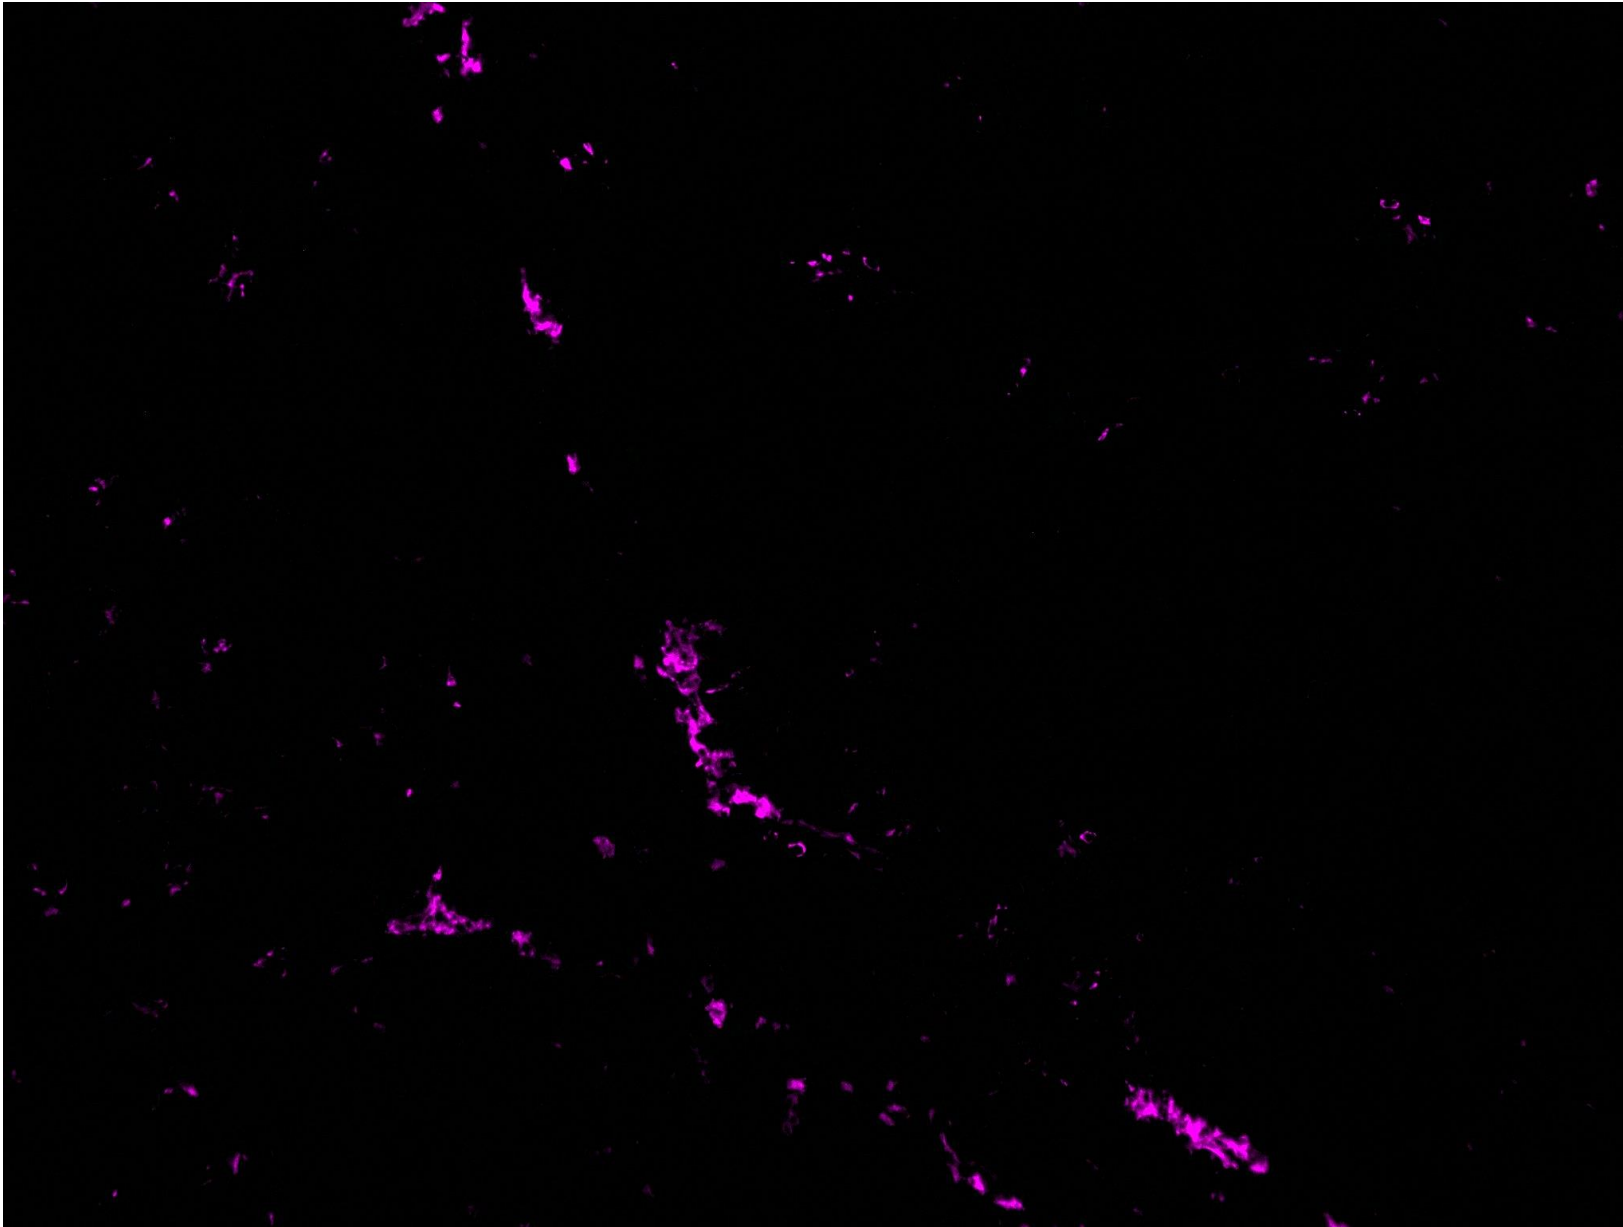

Figure S3B

CTx d4 – DAPI

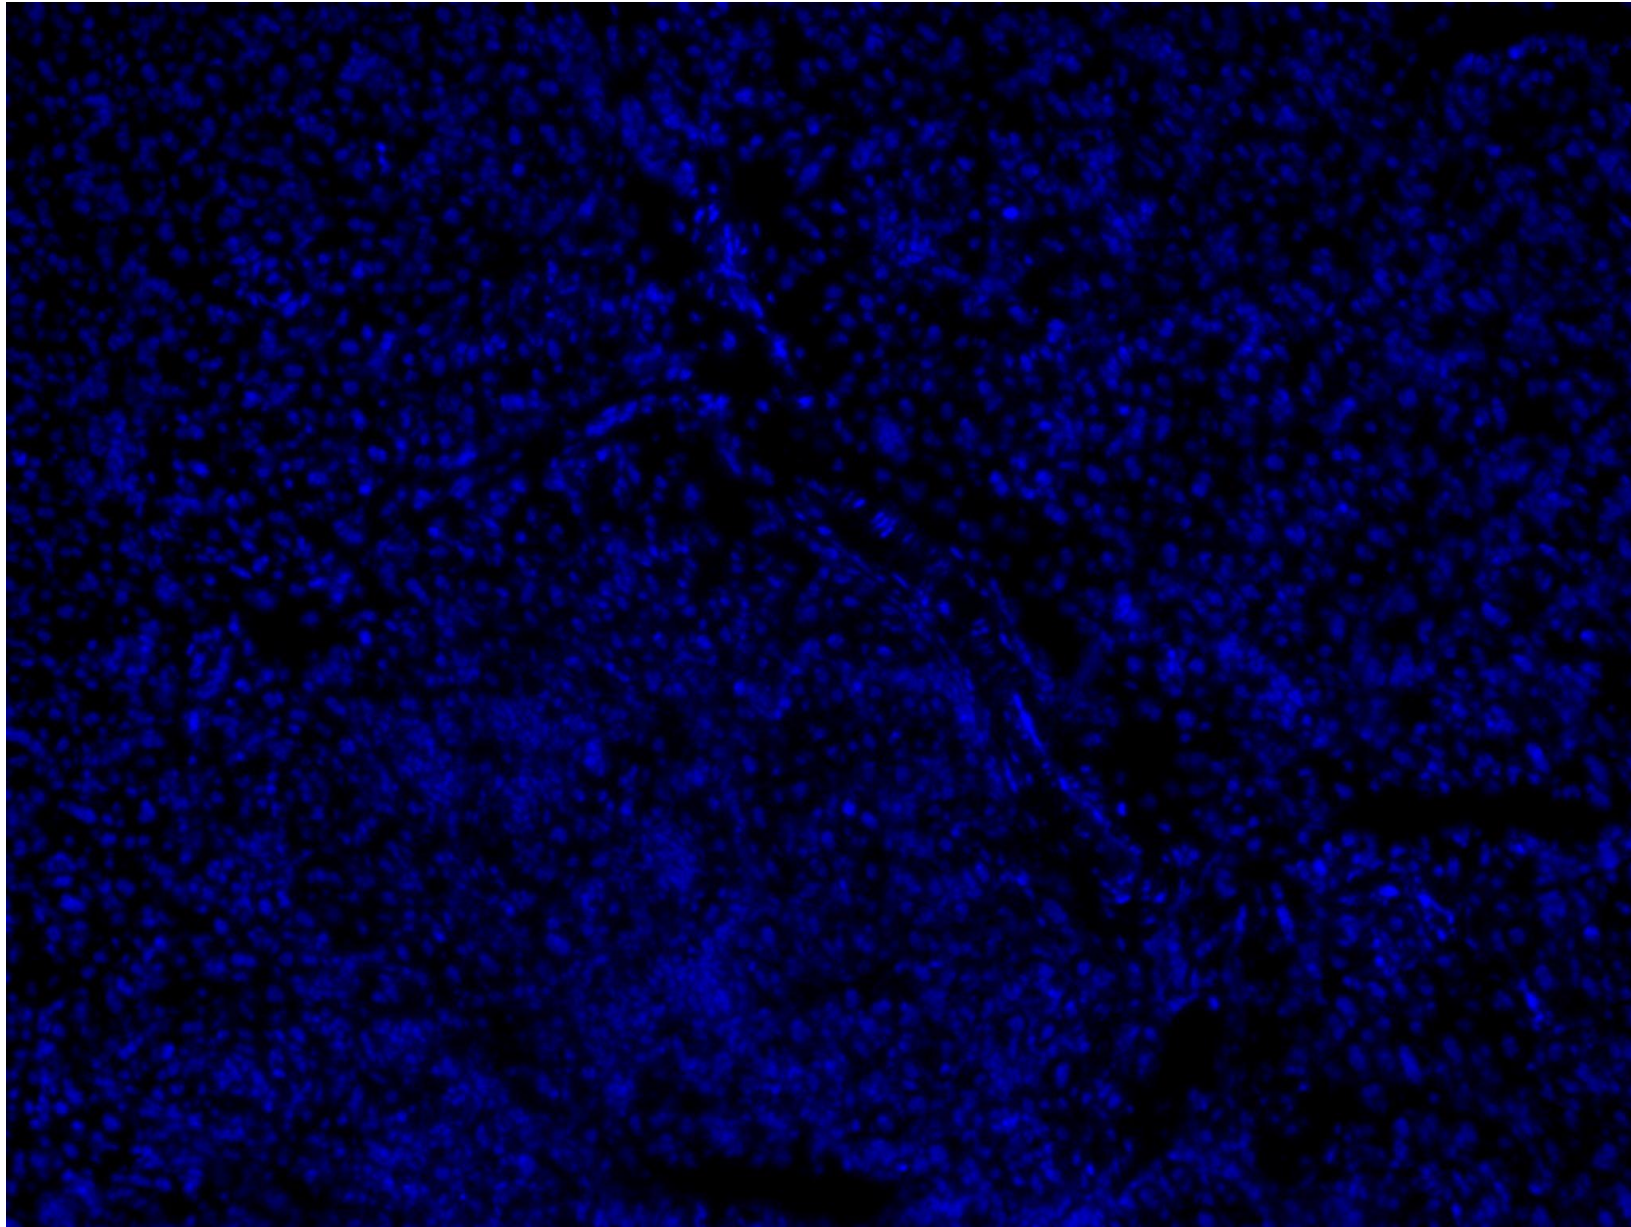

Figure S3B

CTx d4 – alpha-SMA

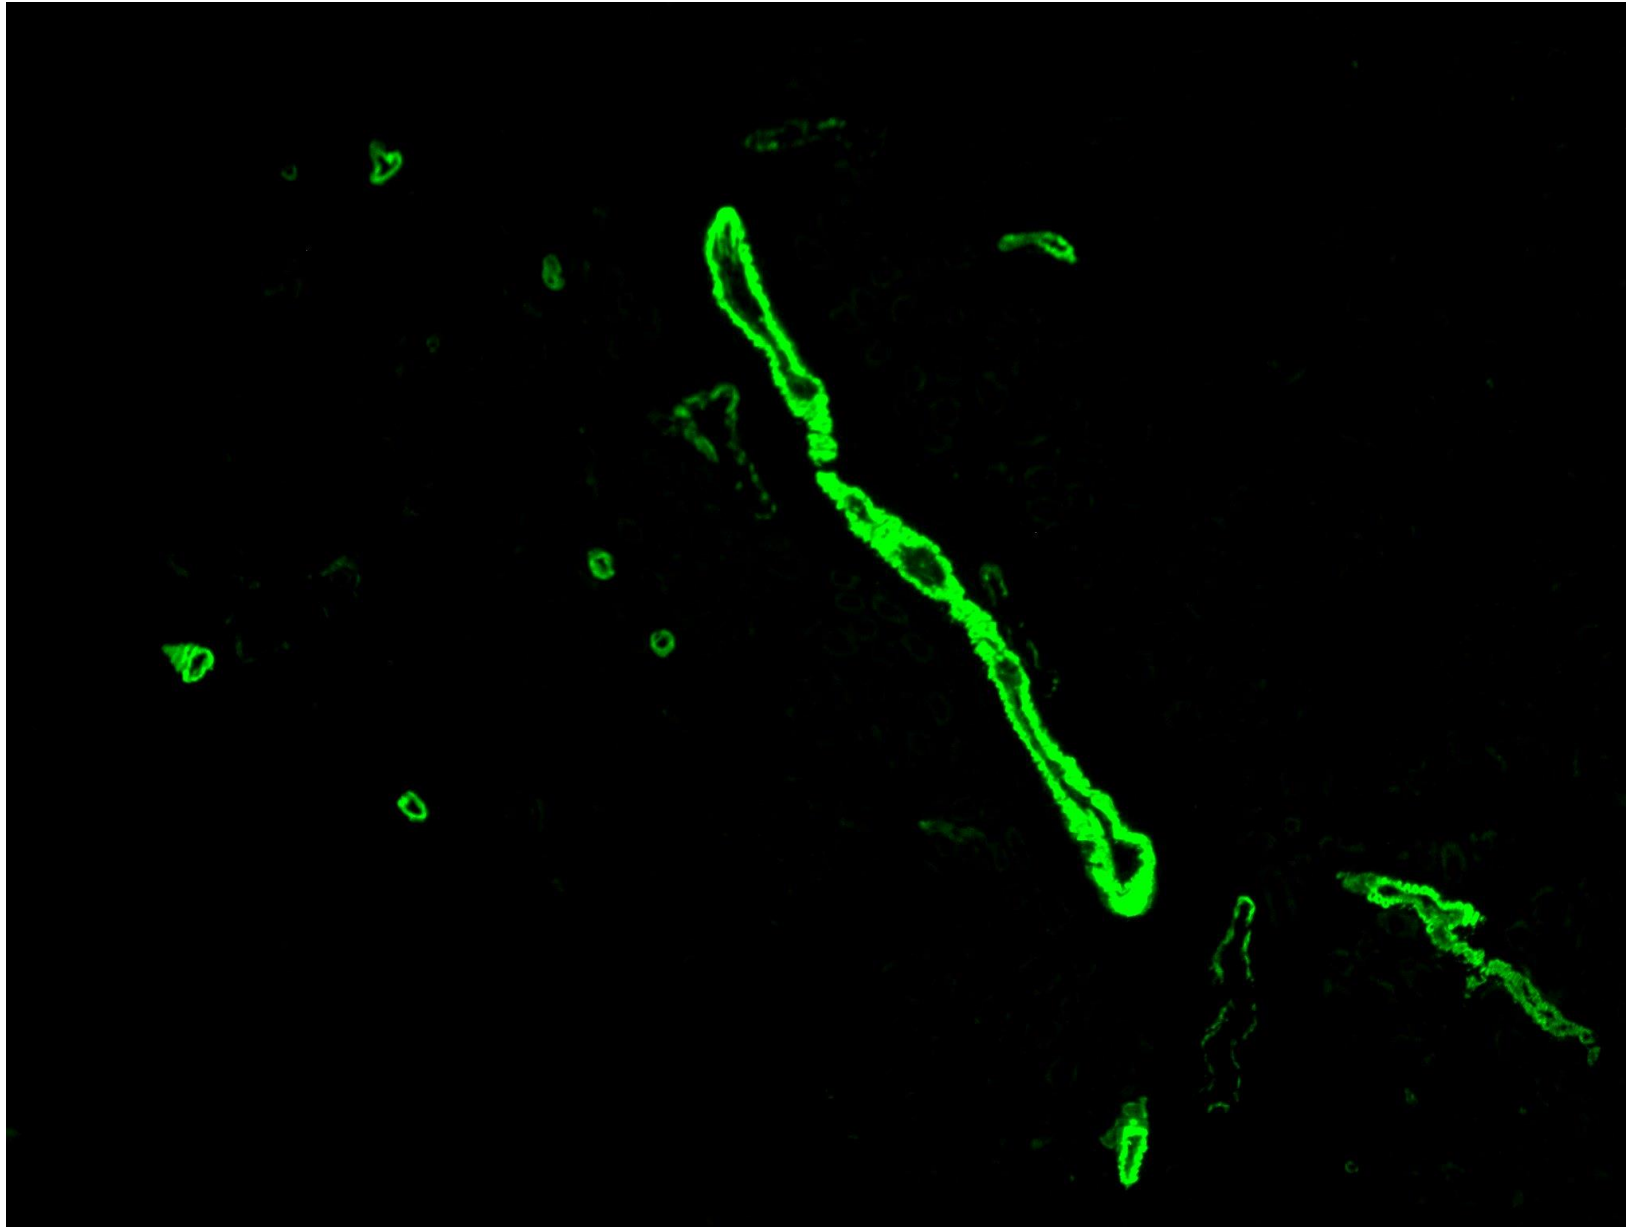

Figure S3B

CTx d4 – CD11b

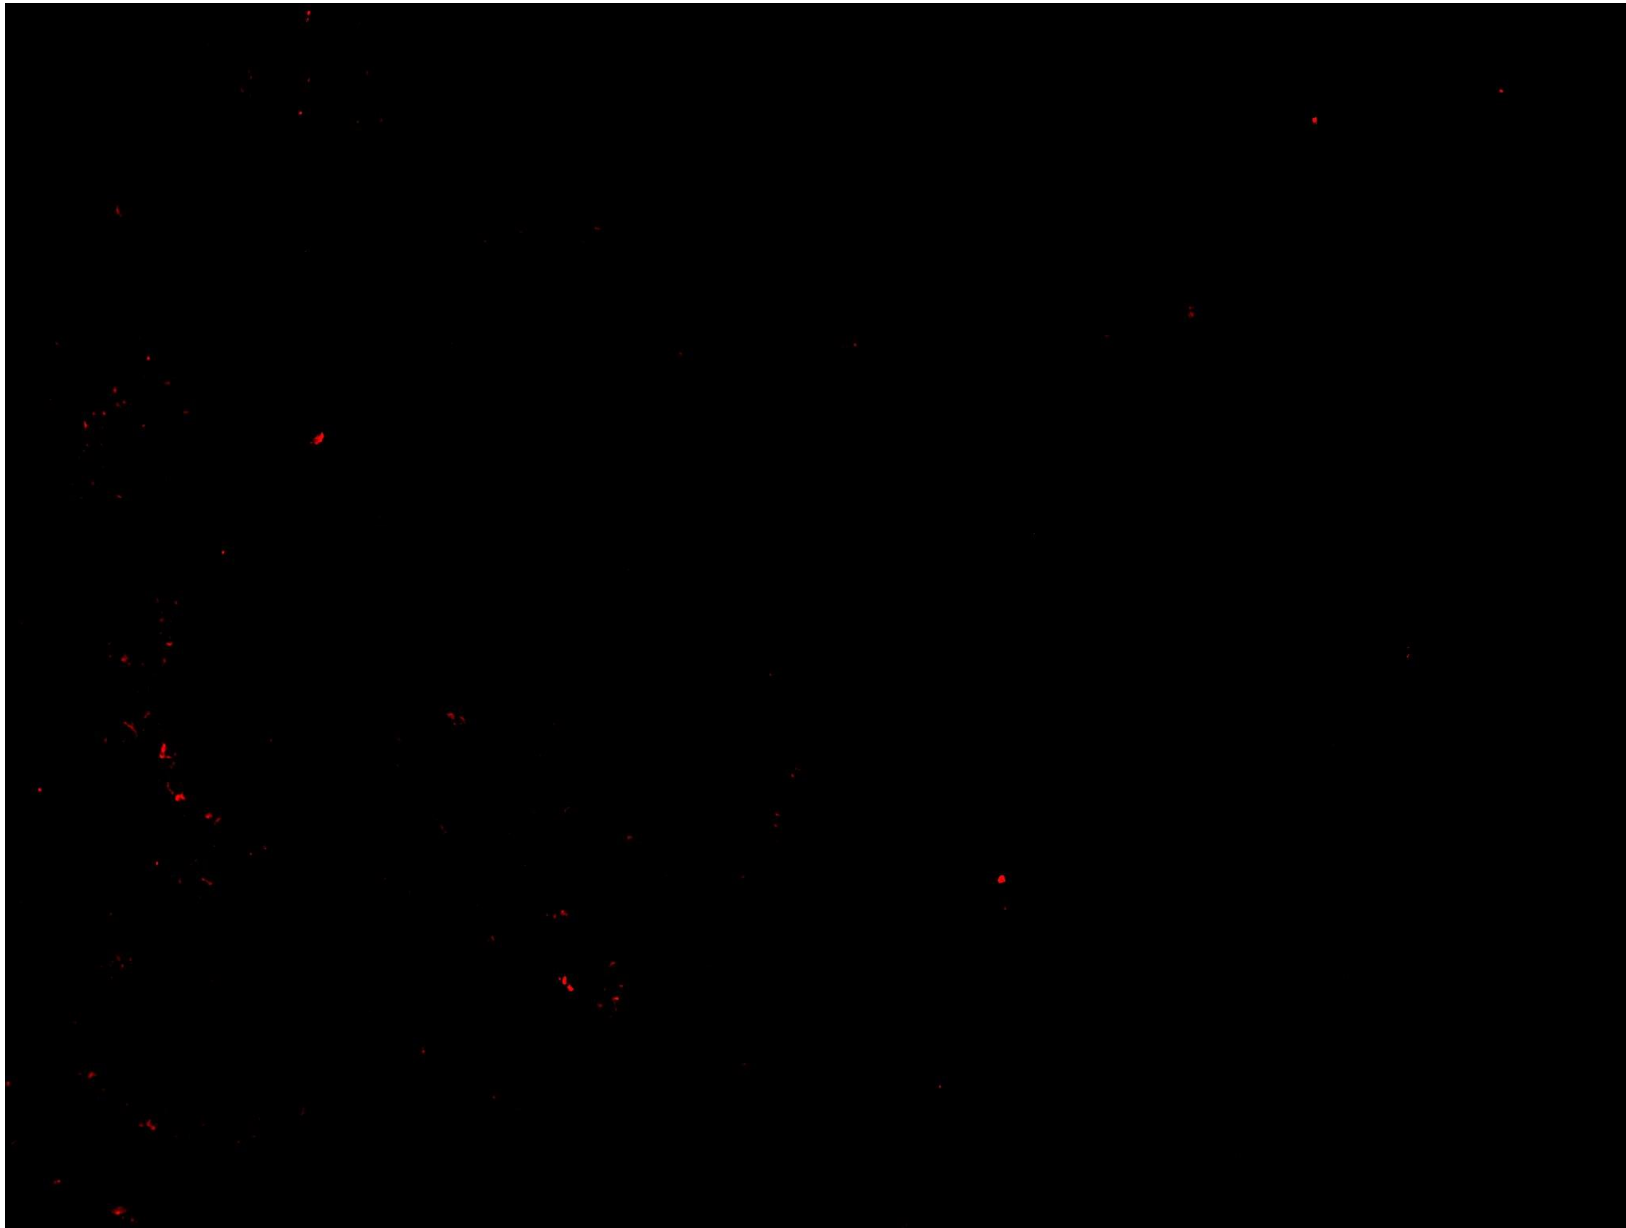

Figure S3B

CTx d4 – CD163

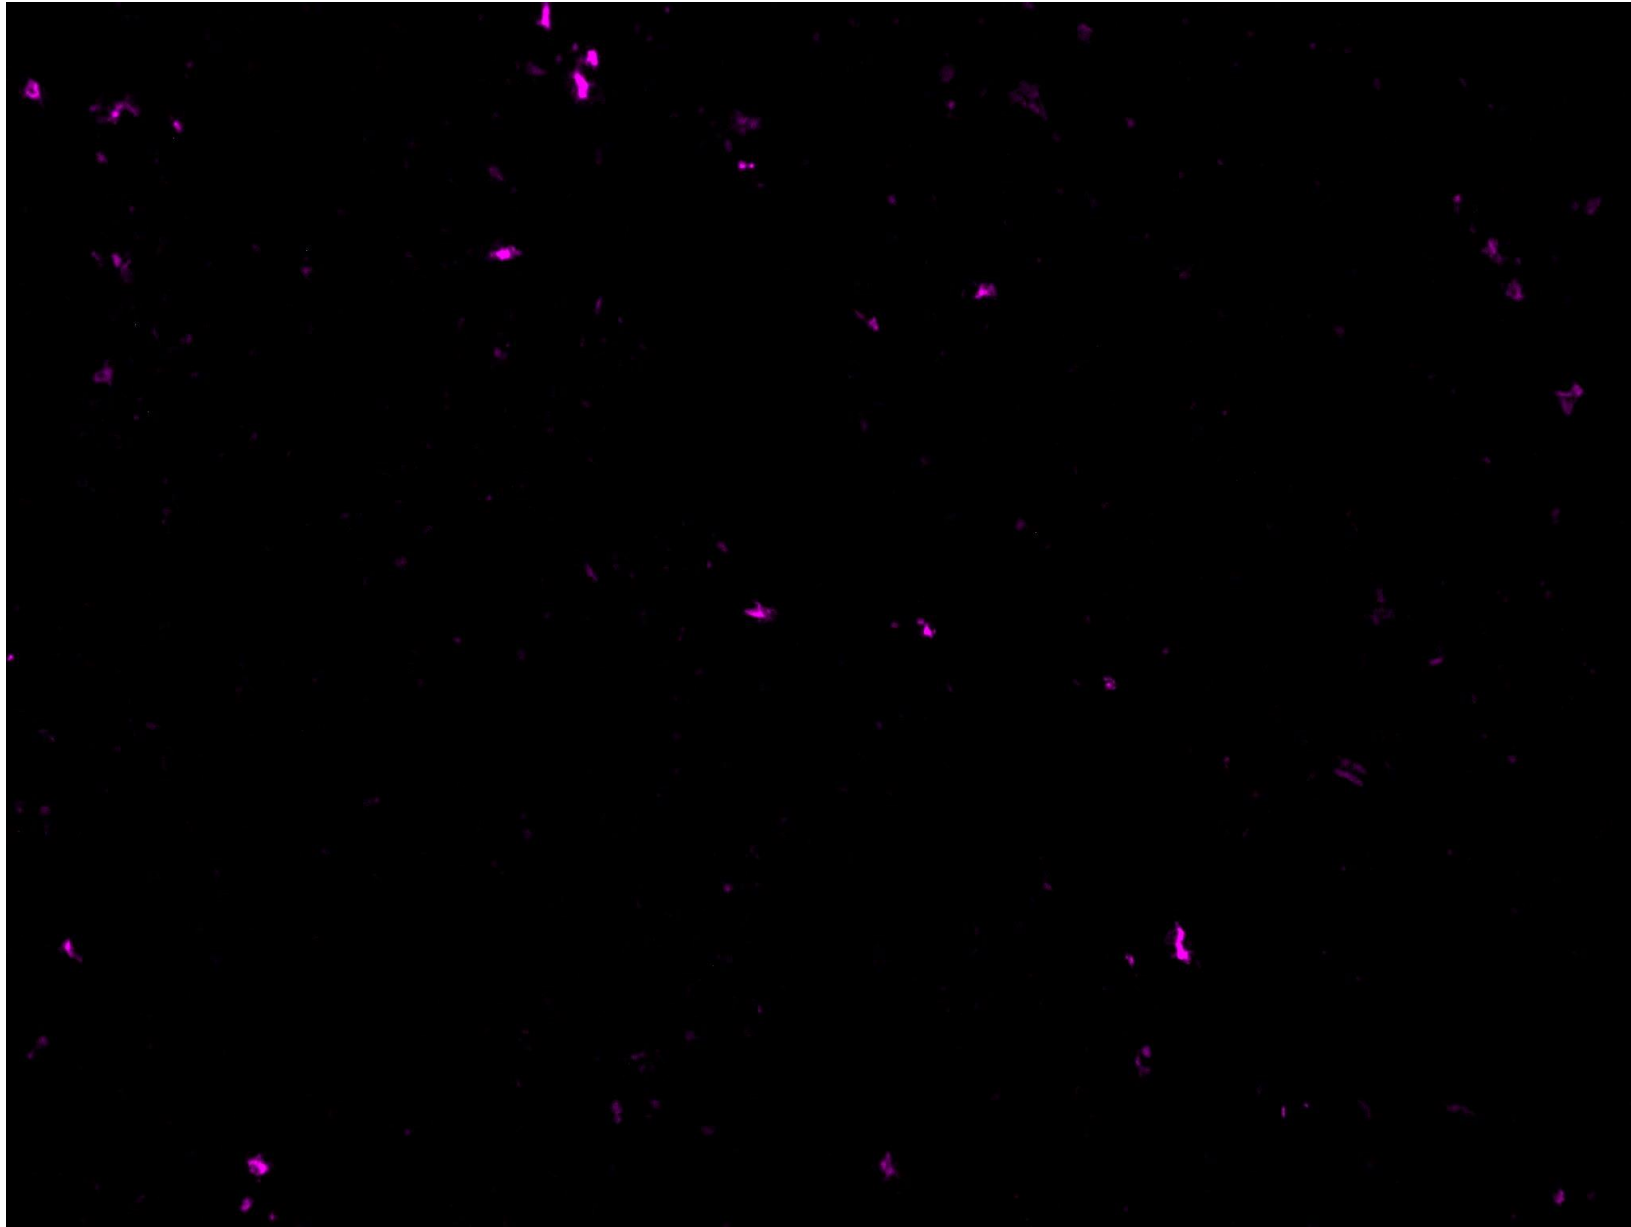

Figure S3B

CTx d5 – DAPI

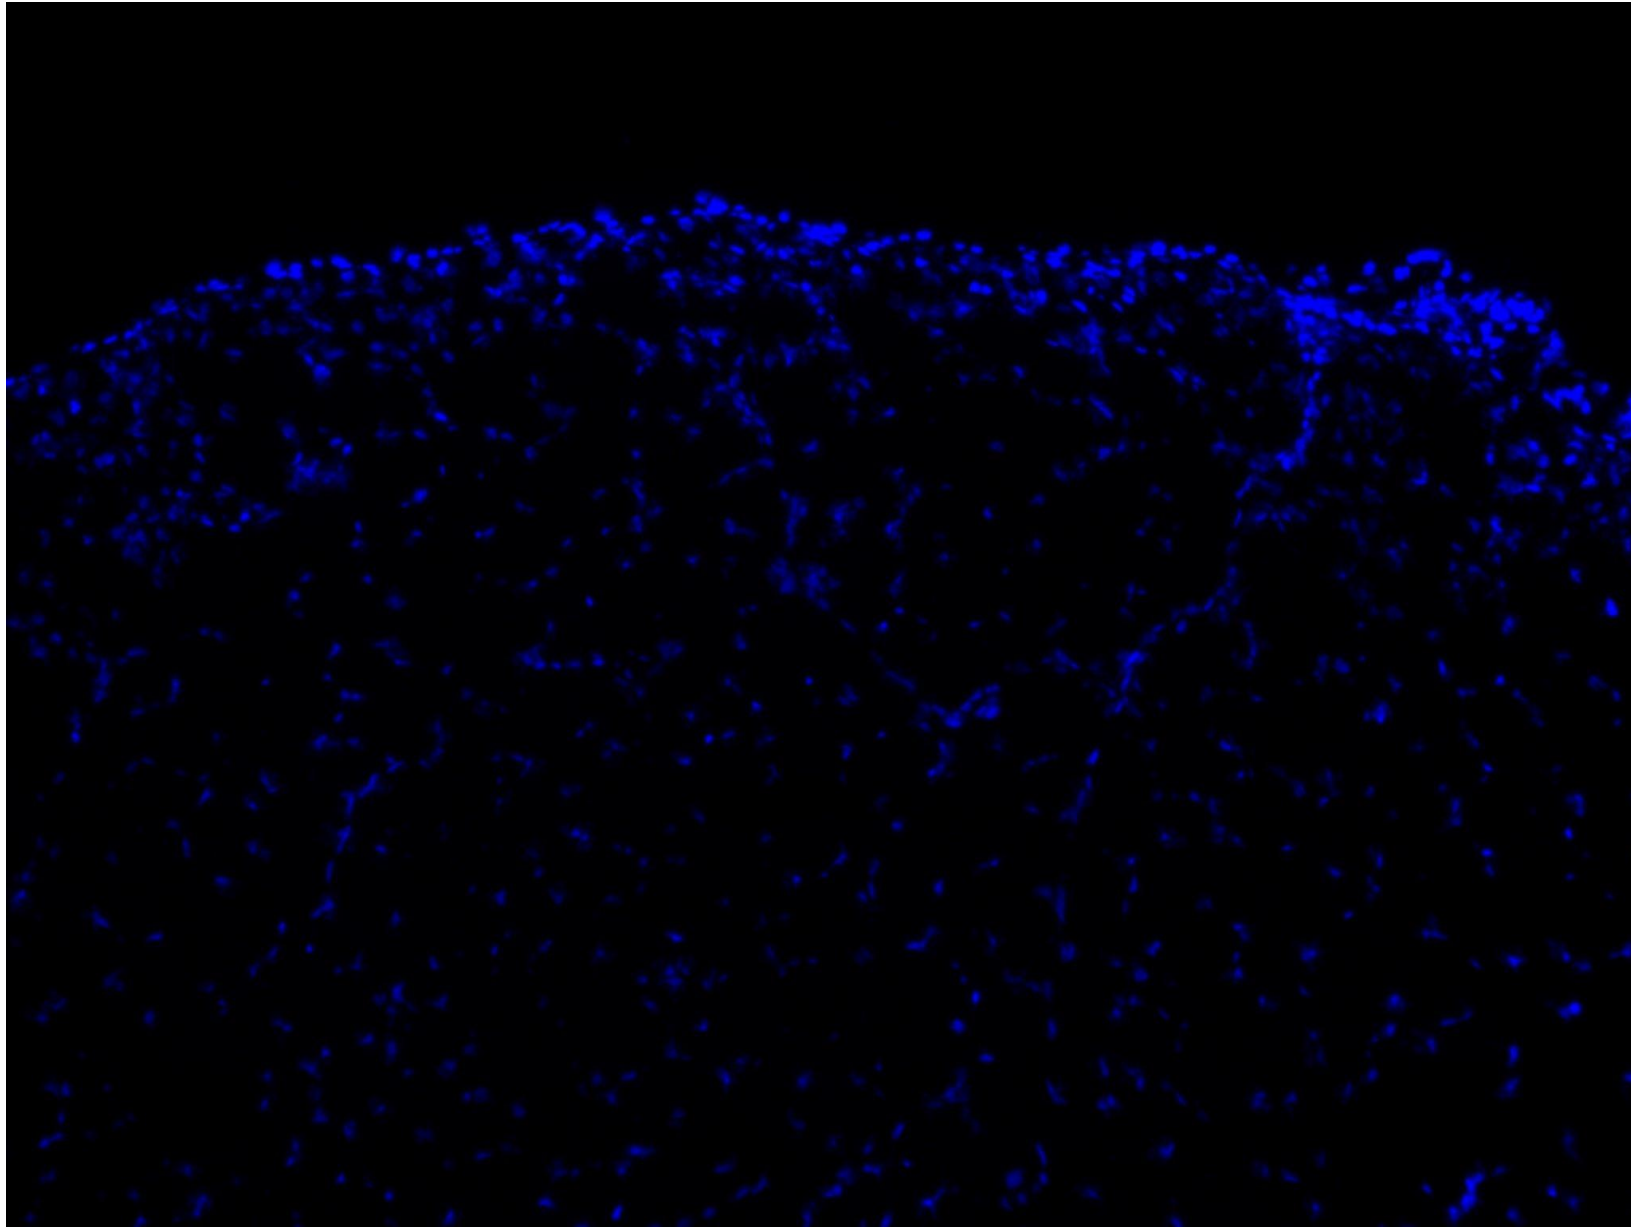

Figure S3B

CTx d5 – alpha-SMA

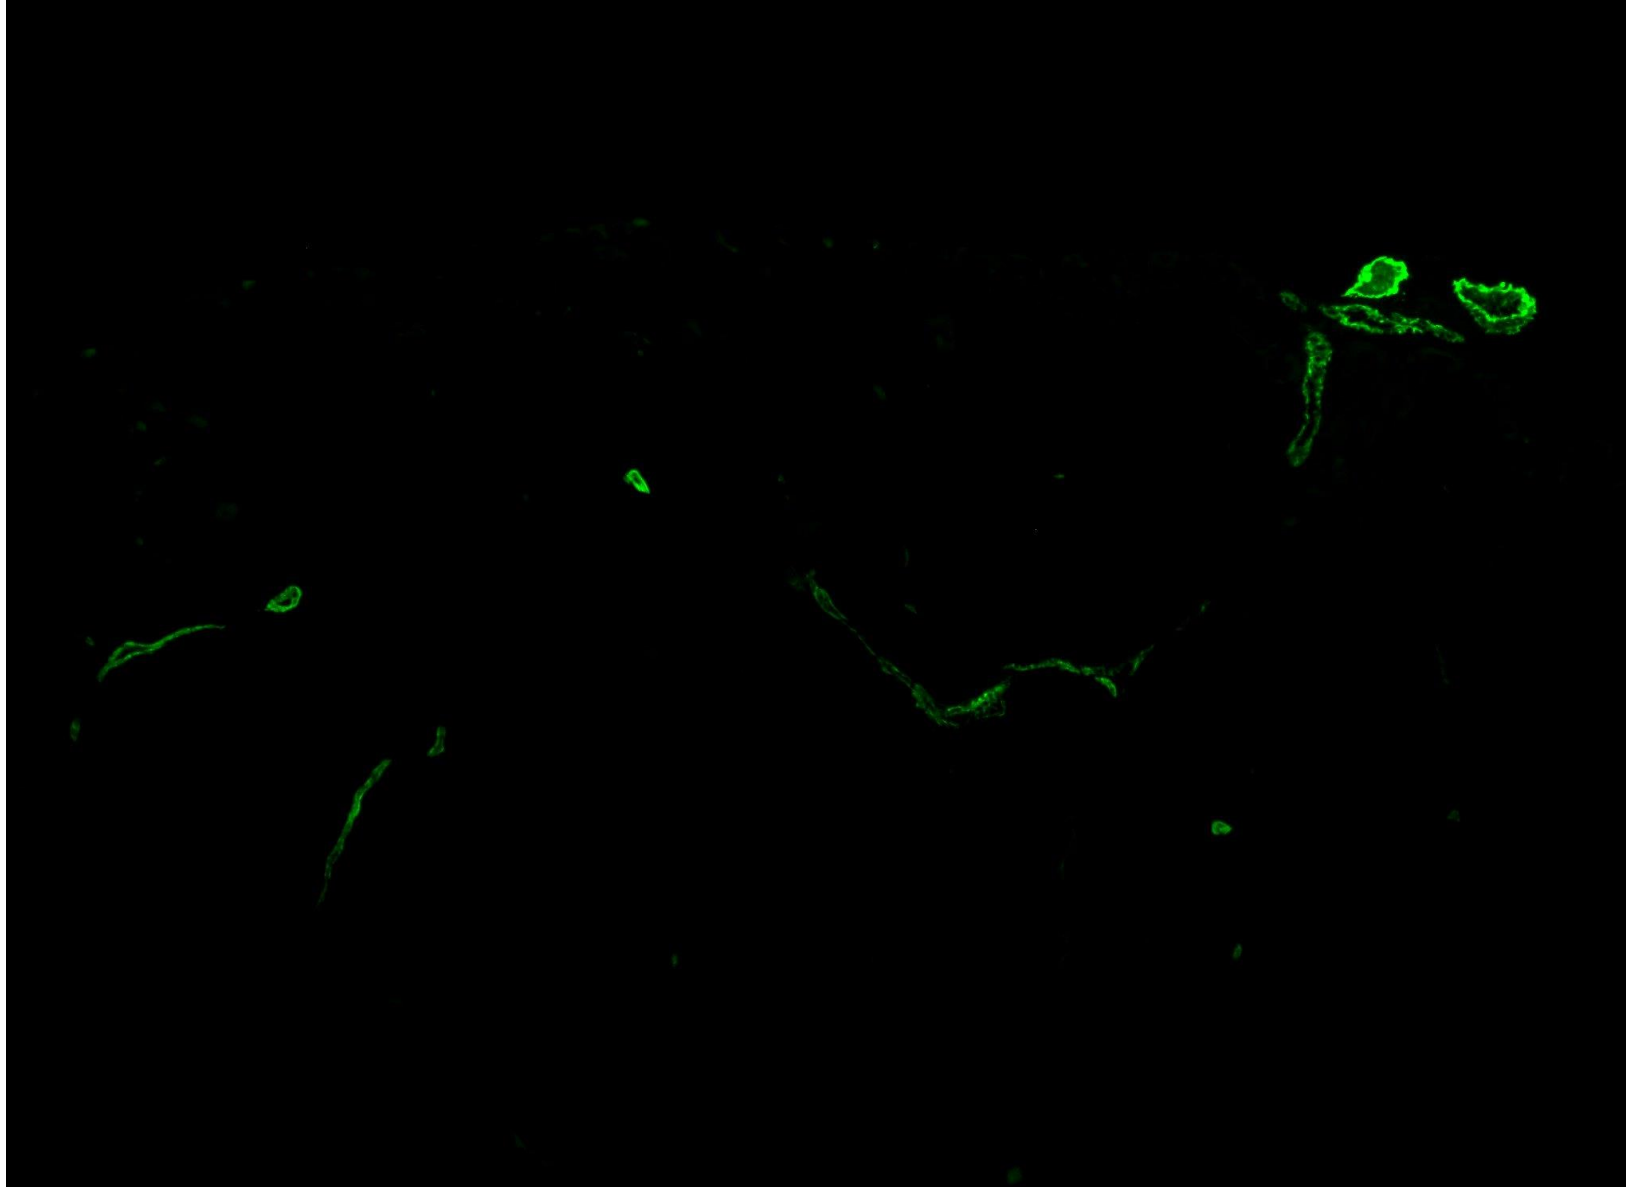

Figure S3B

CTx d5 – CD11b

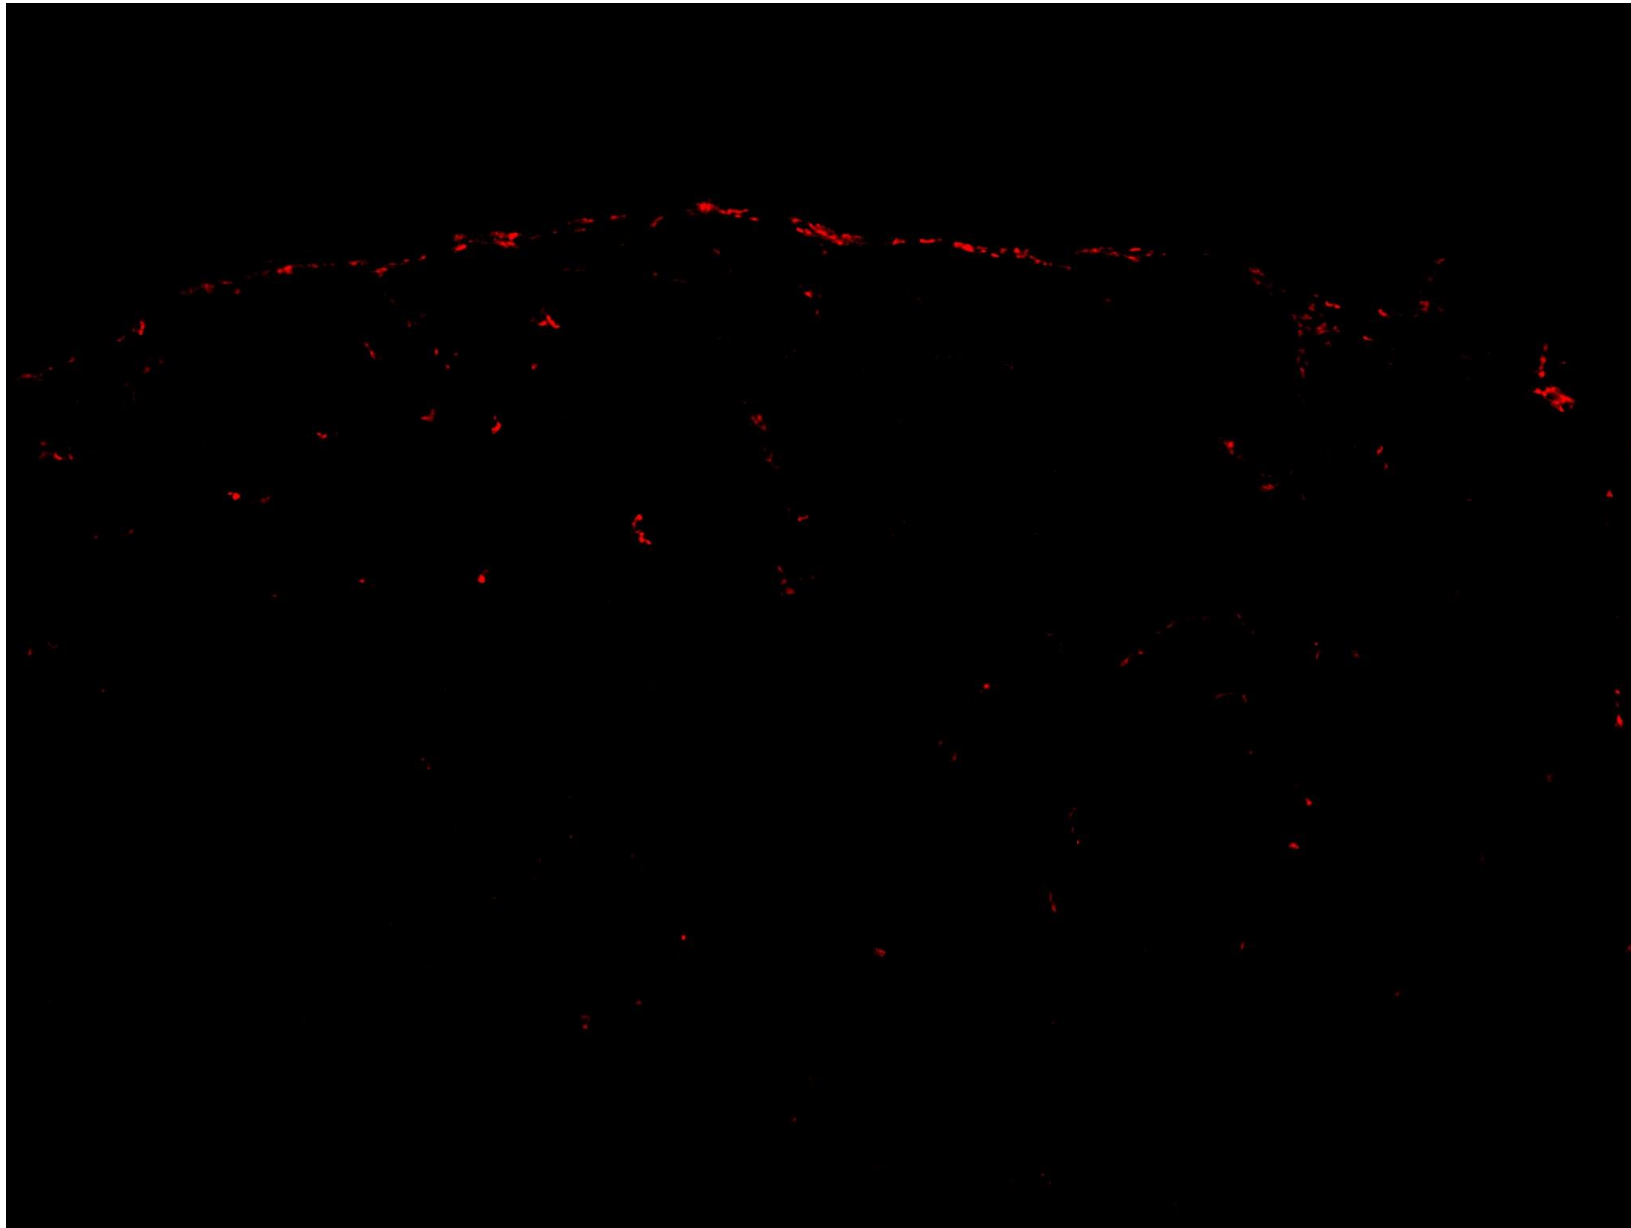

Figure S3B

CTx d5 – CD163

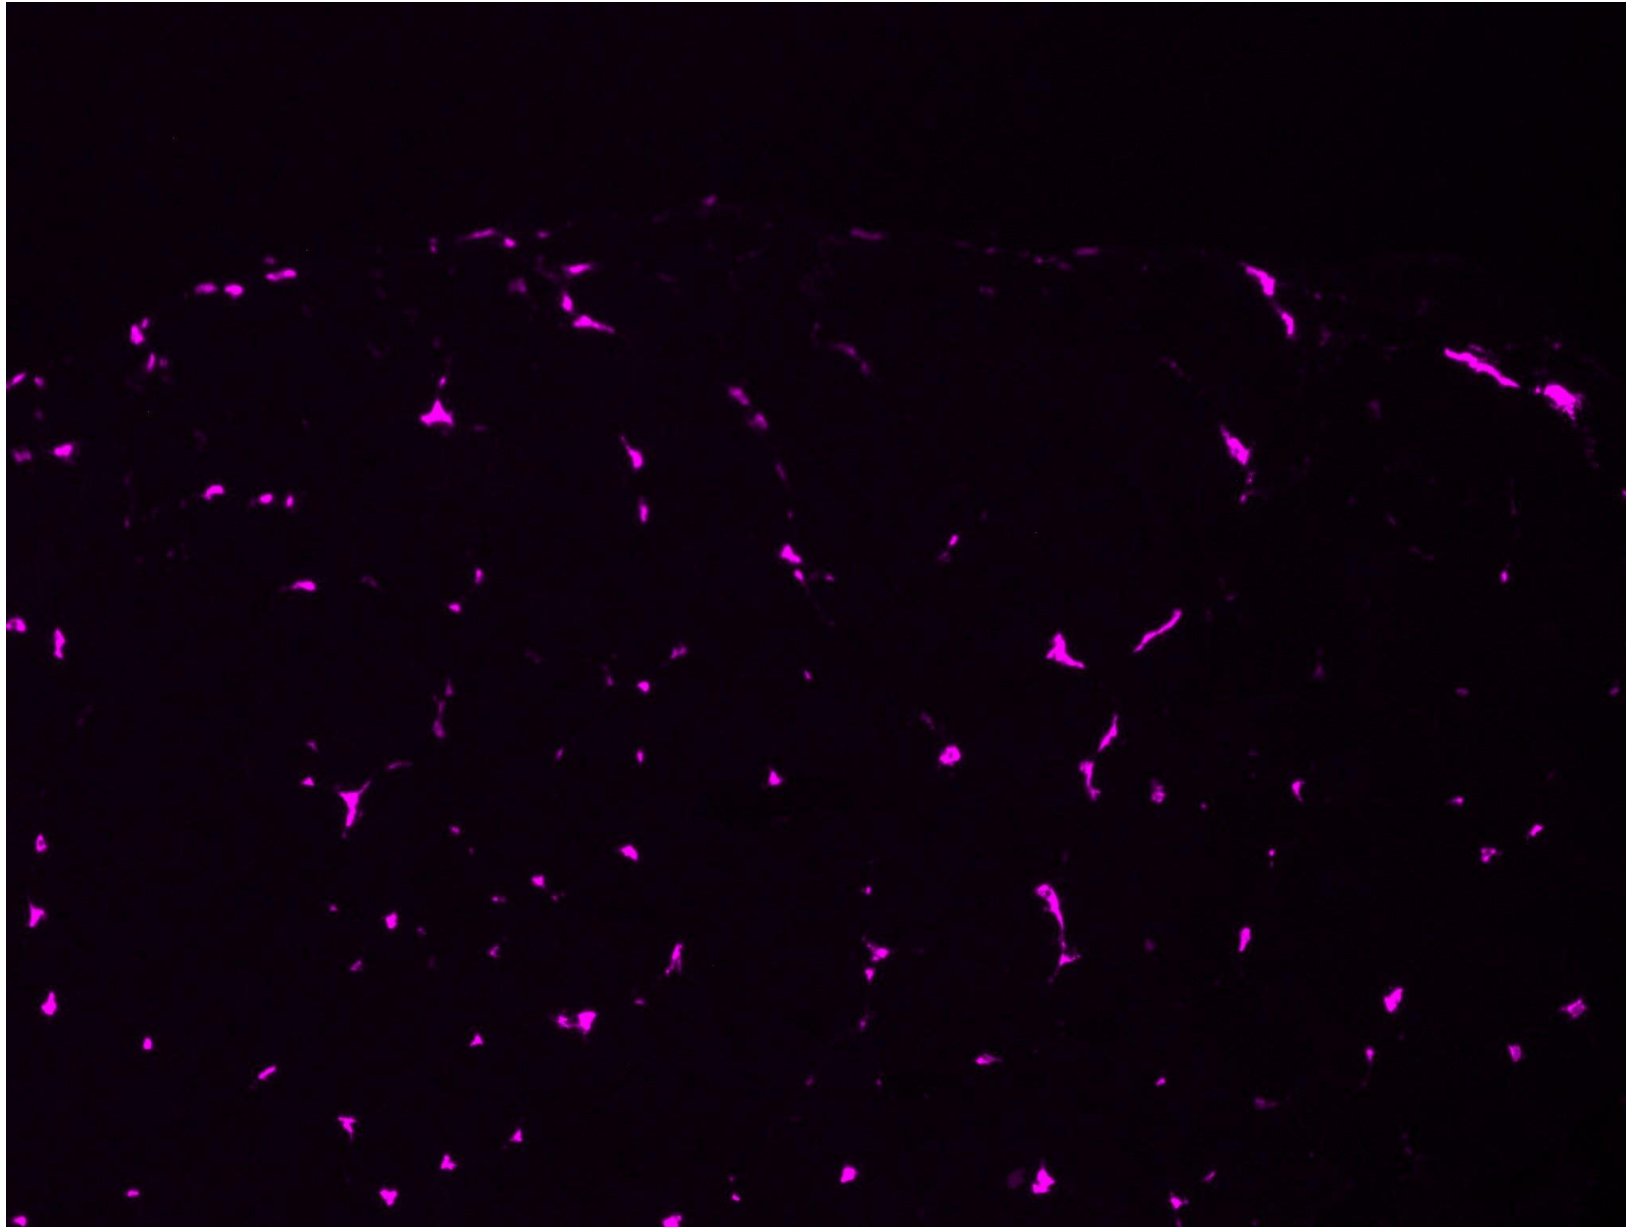

Figure S5C – Upper row  
CTx d0 – DAPI

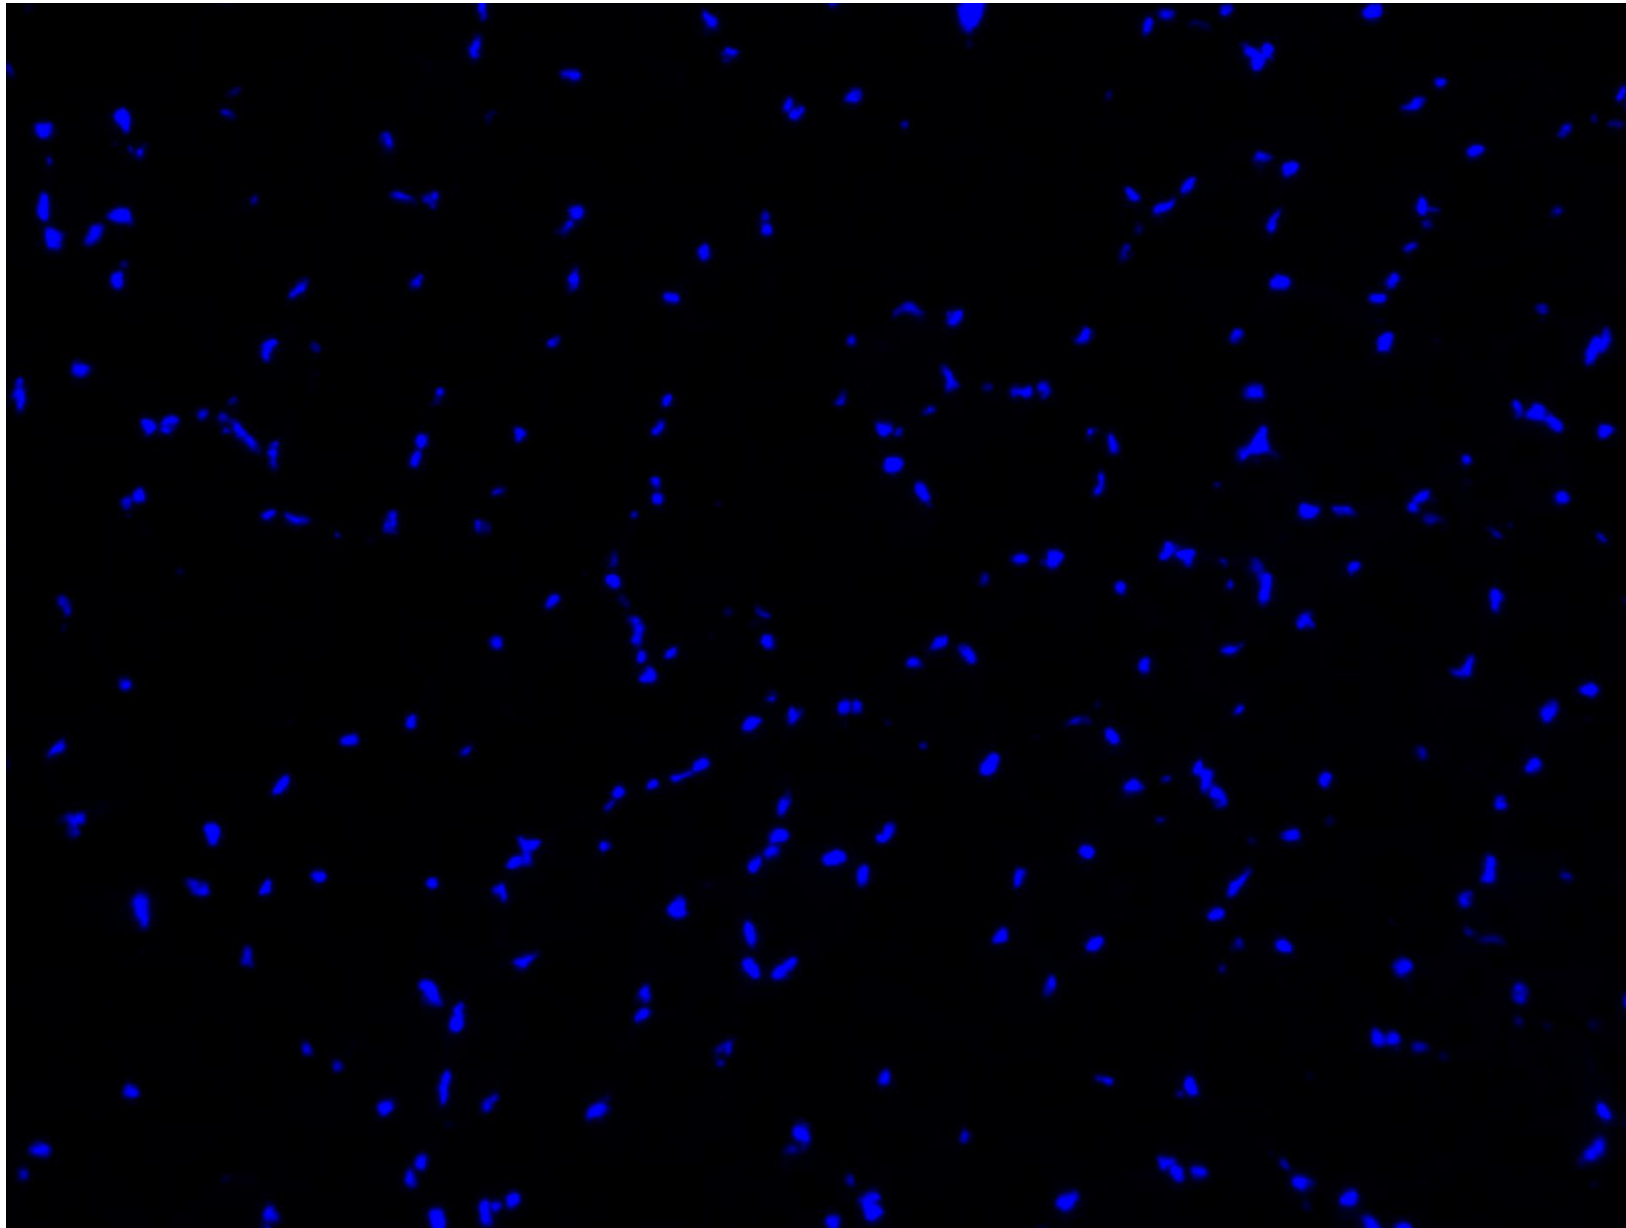

Figure S5C – Upper row  
CTx d0 – Ly6C

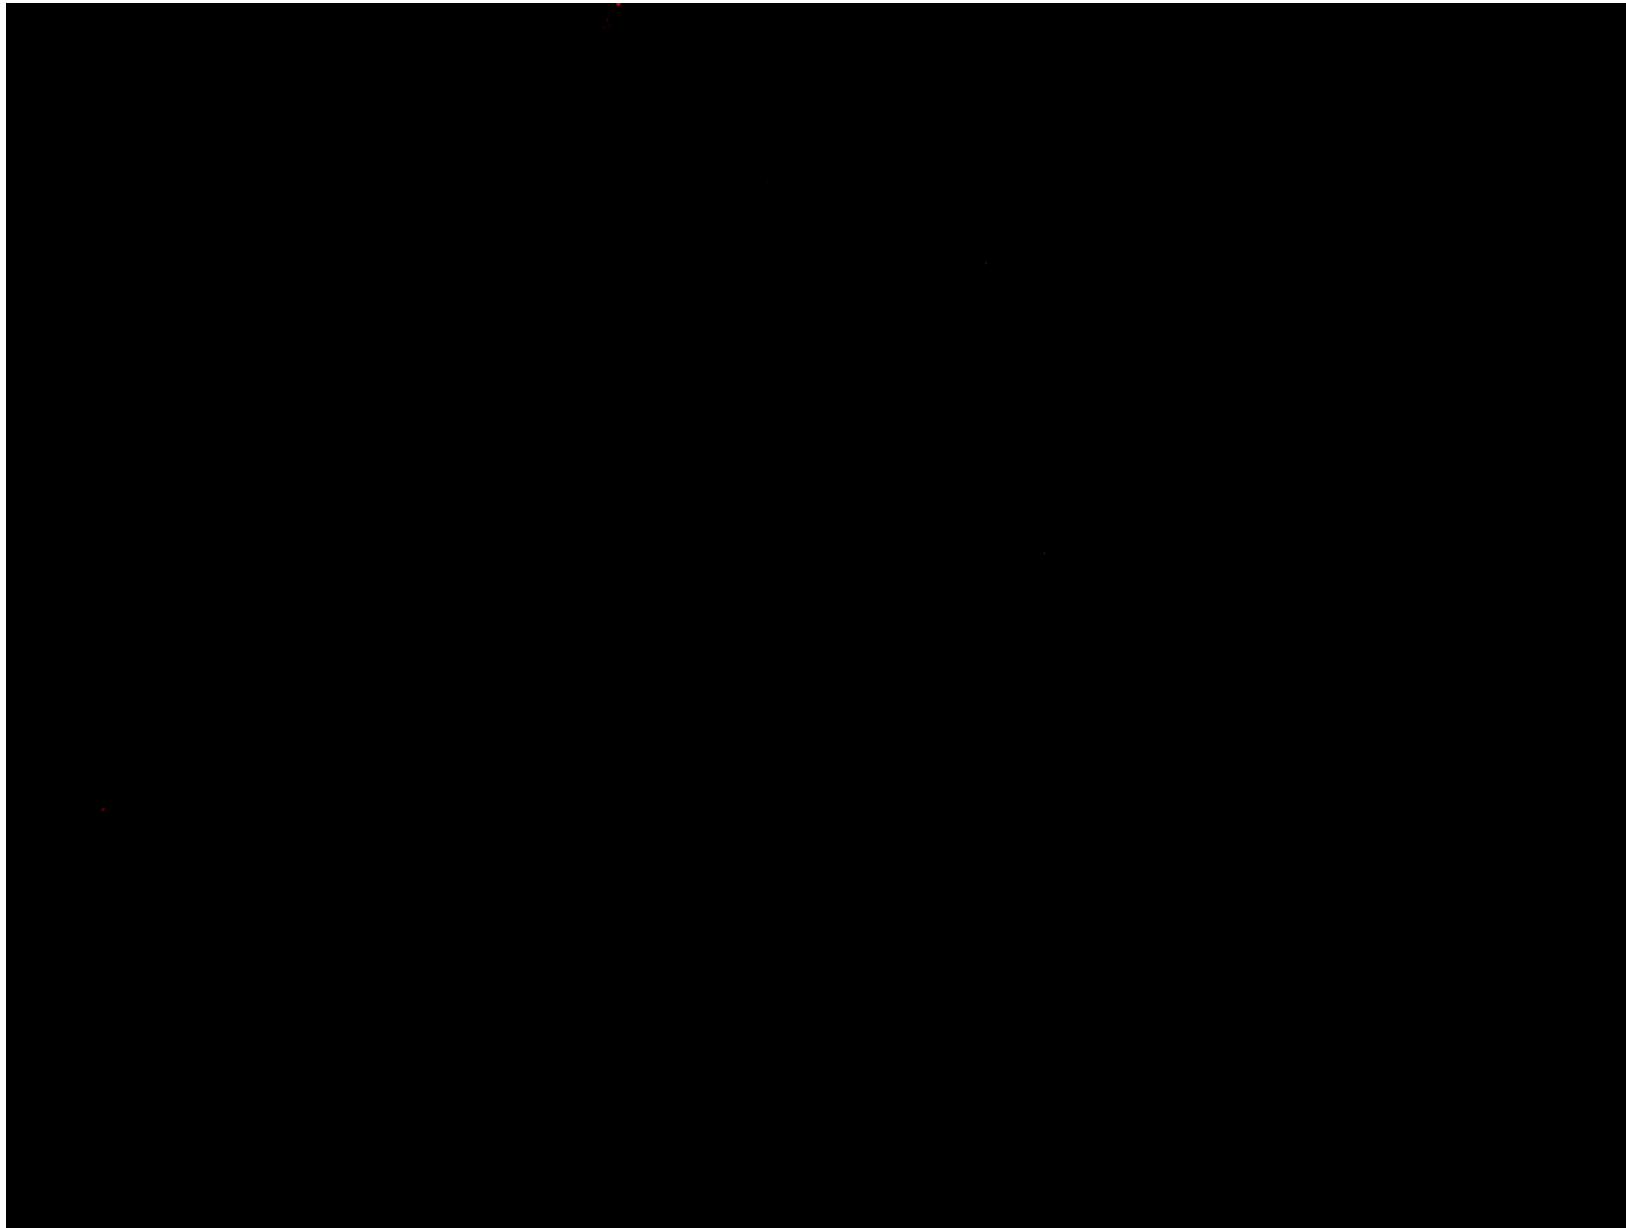

Figure S5C – Upper row

CTx d0 – TUNEL

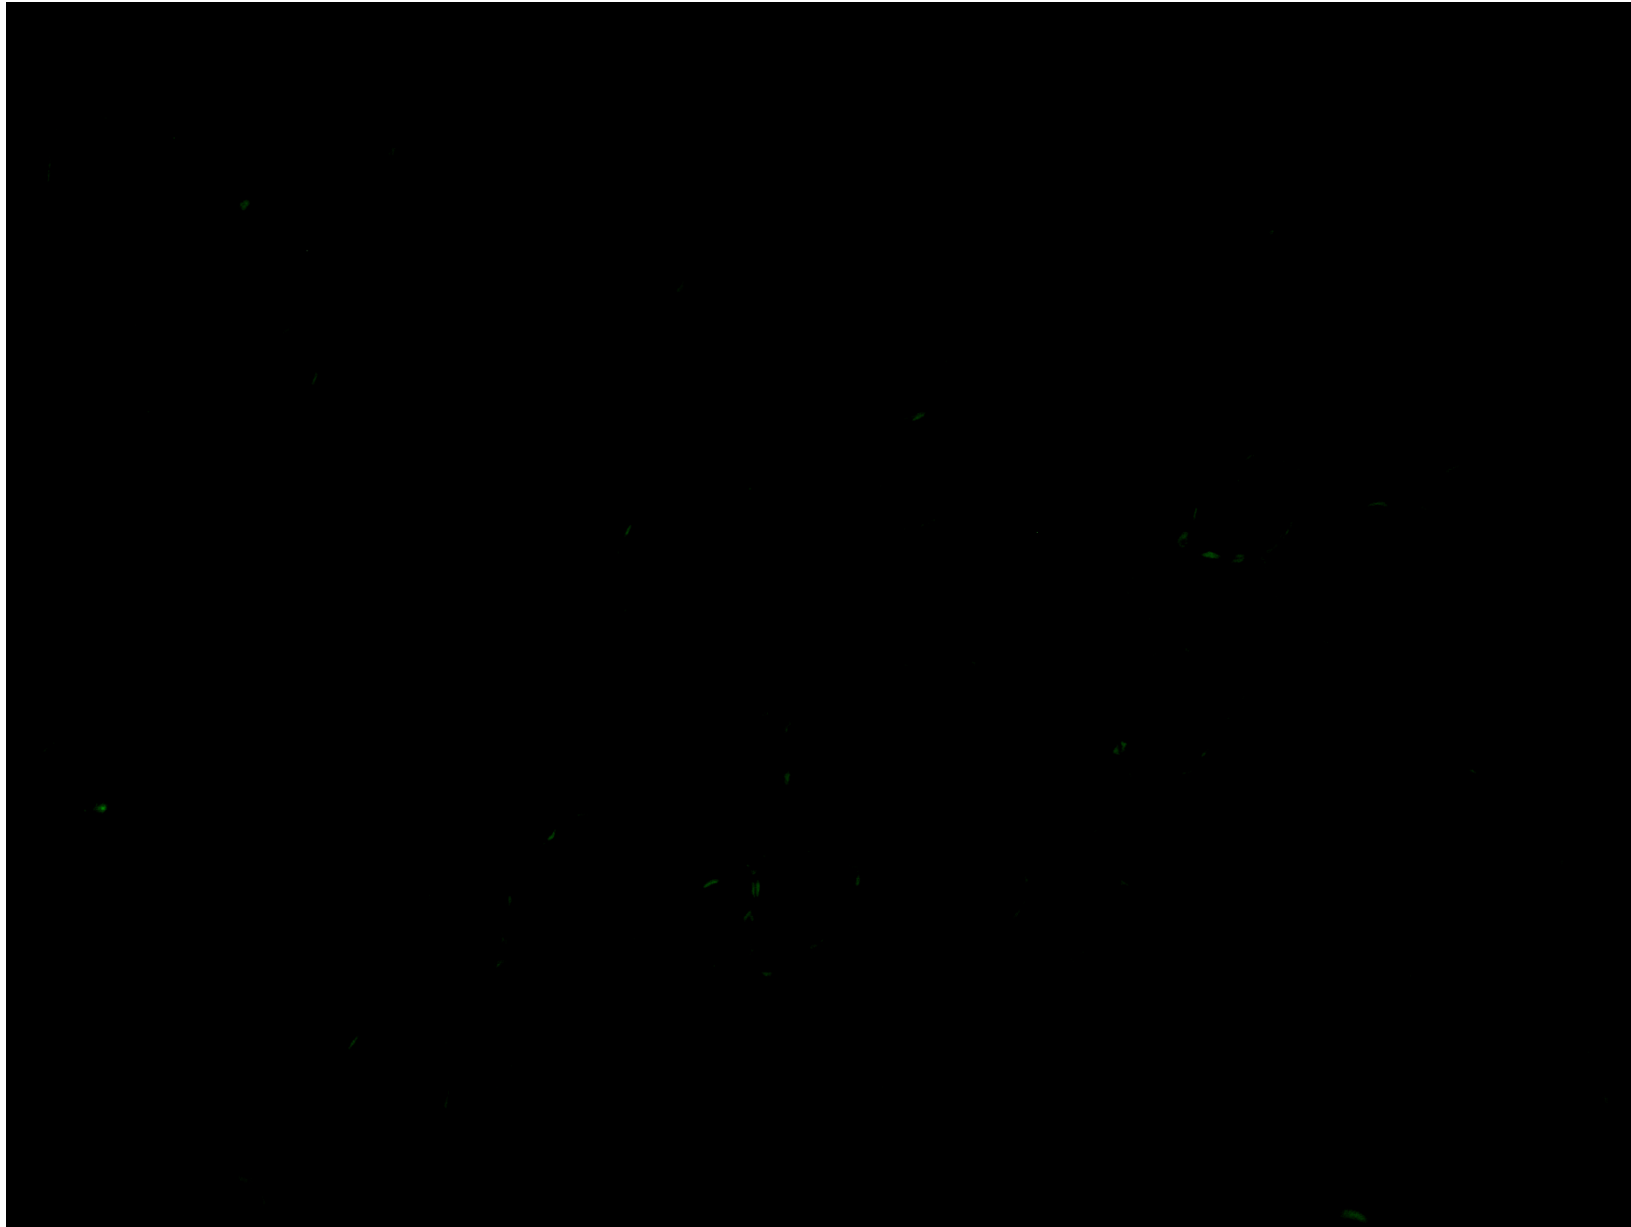

Figure S5C – Upper row  
CTx d3 – DAPI

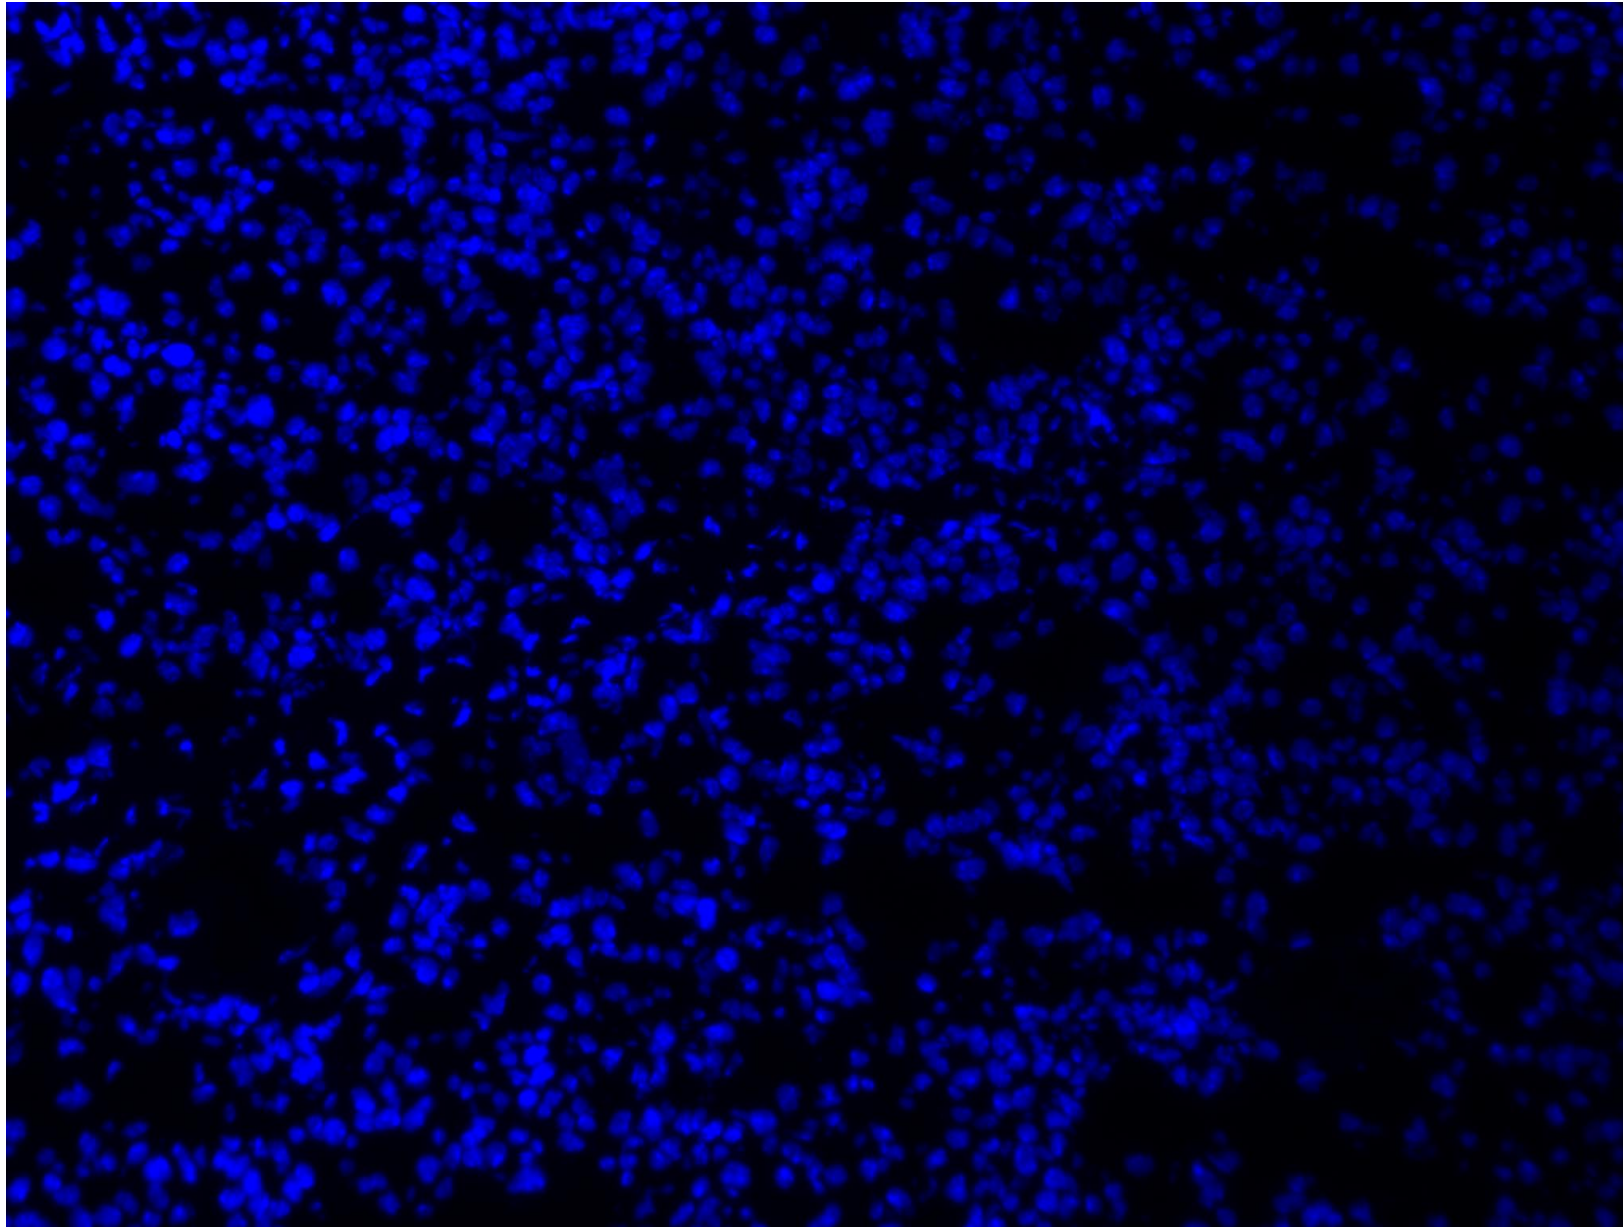

Figure S5C – Upper row  
CTx d3 – Ly6C

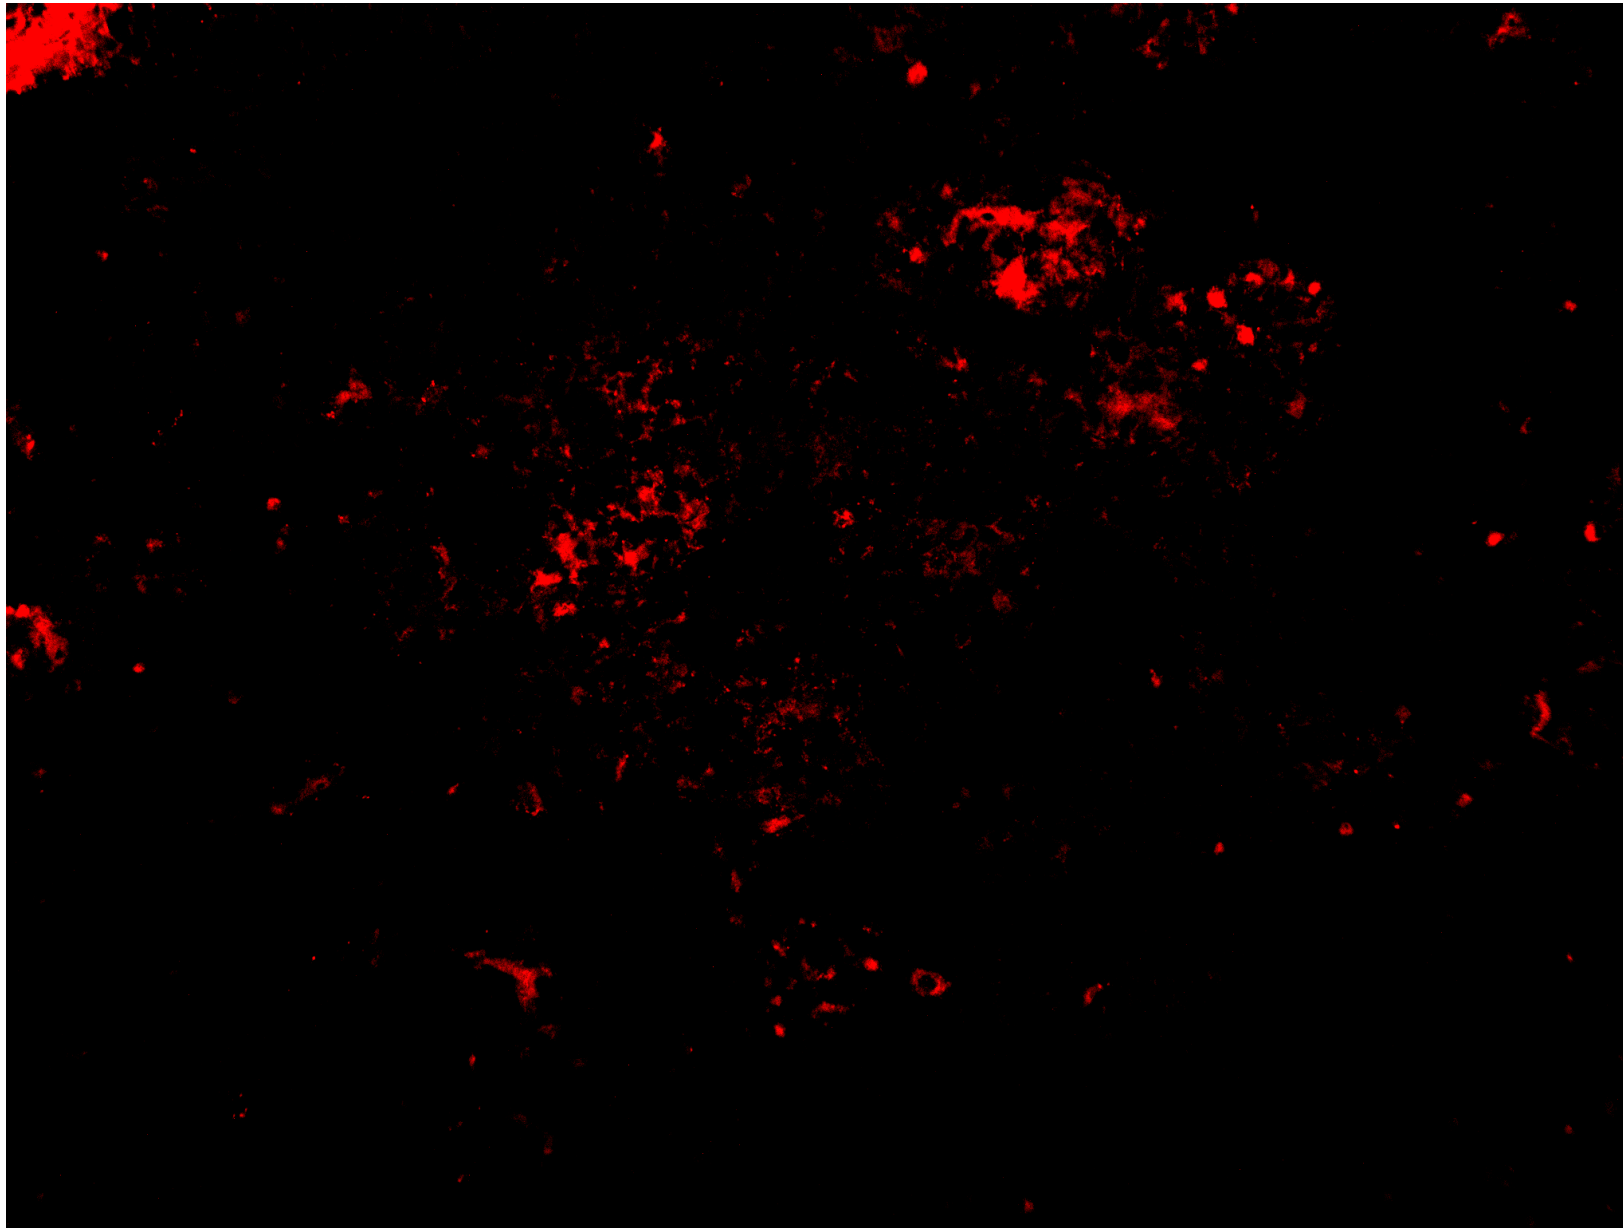

Figure S5C – Upper row  
CTx d3 – TUNEL

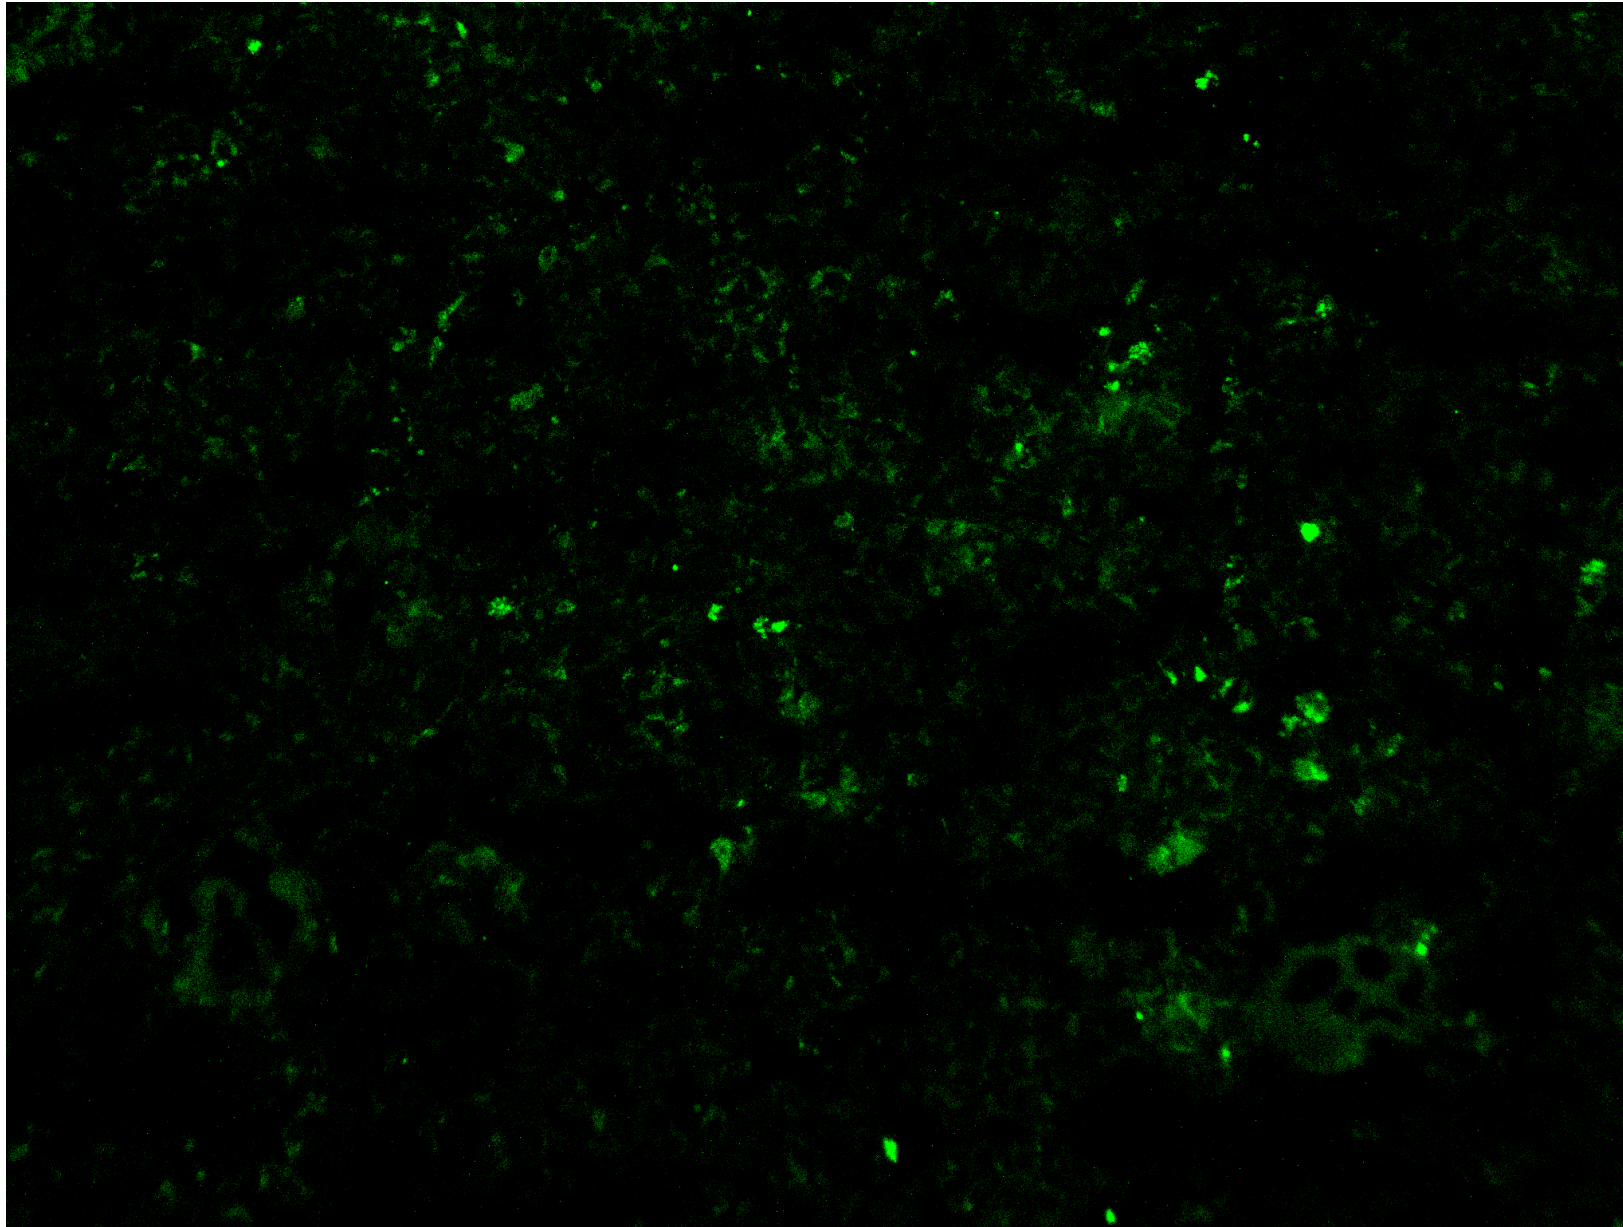

Figure S5C – Upper row  
CTx d4 – DAPI

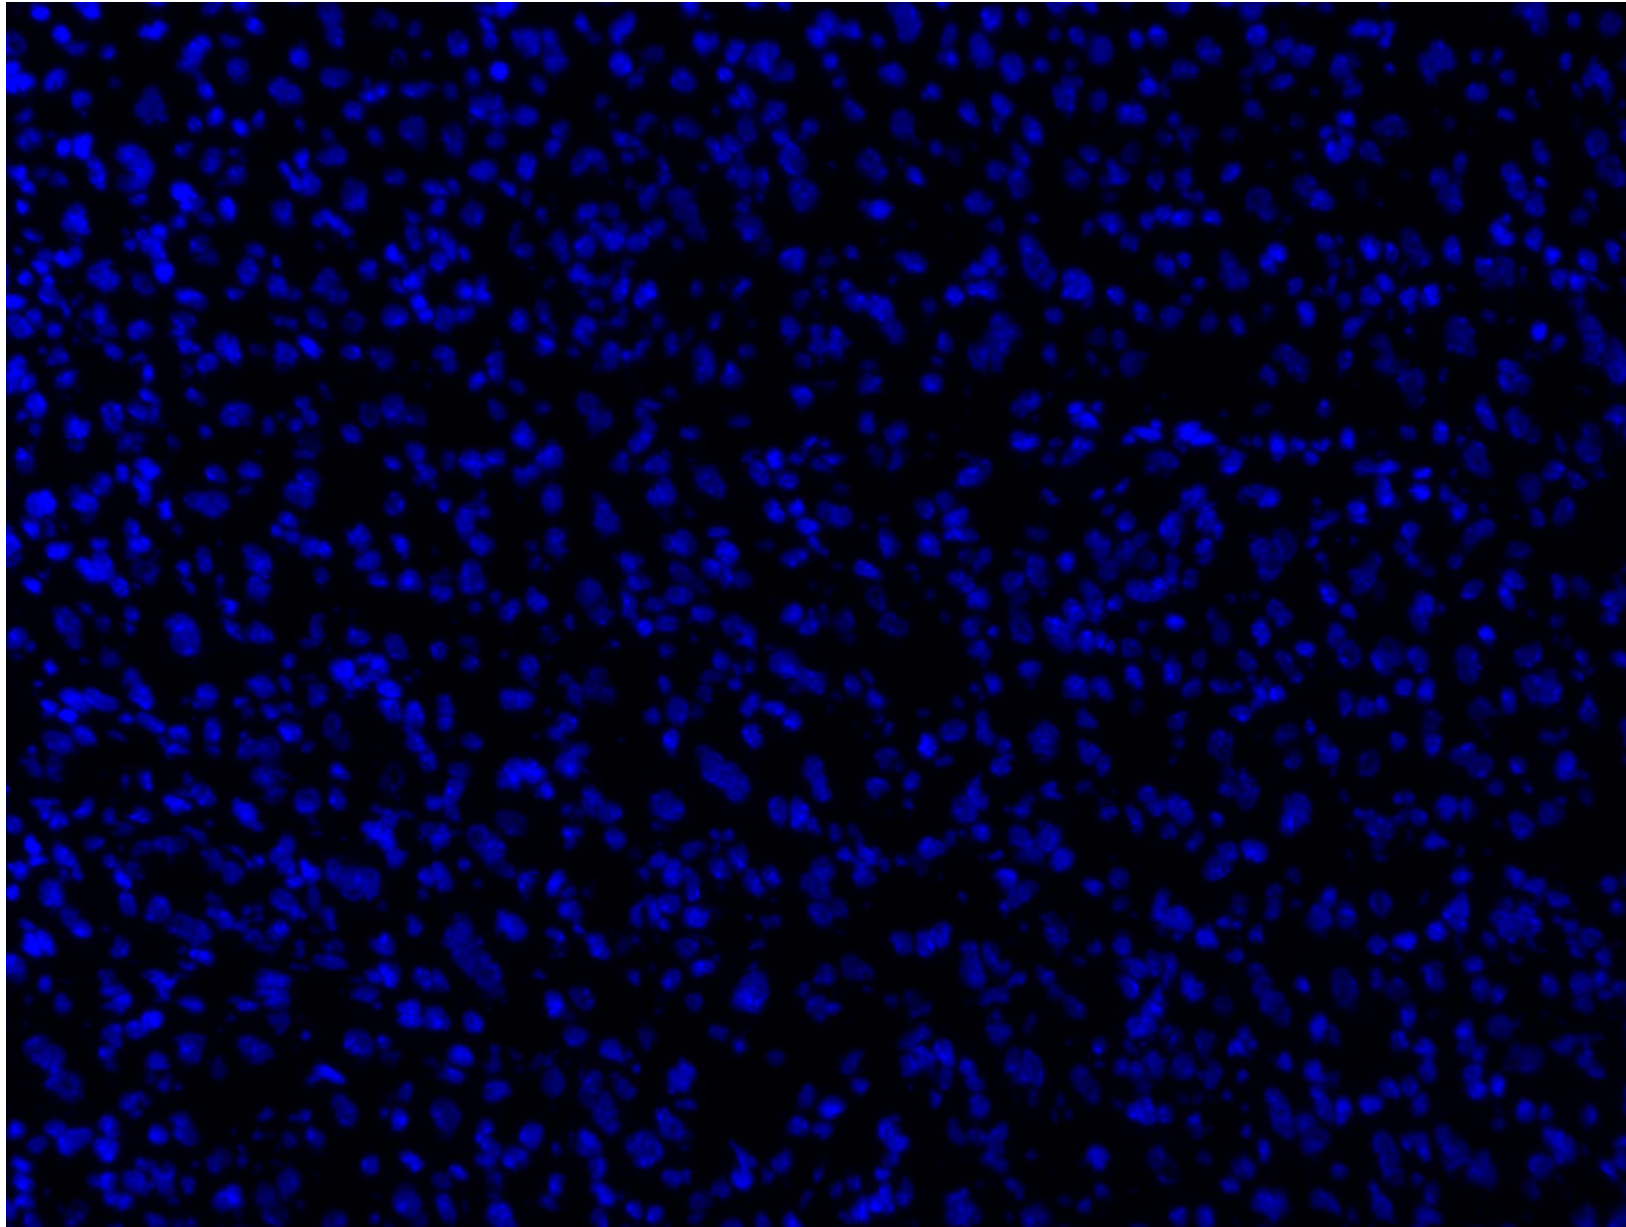

Figure S5C – Upper row  
CTx d4 – Ly6C

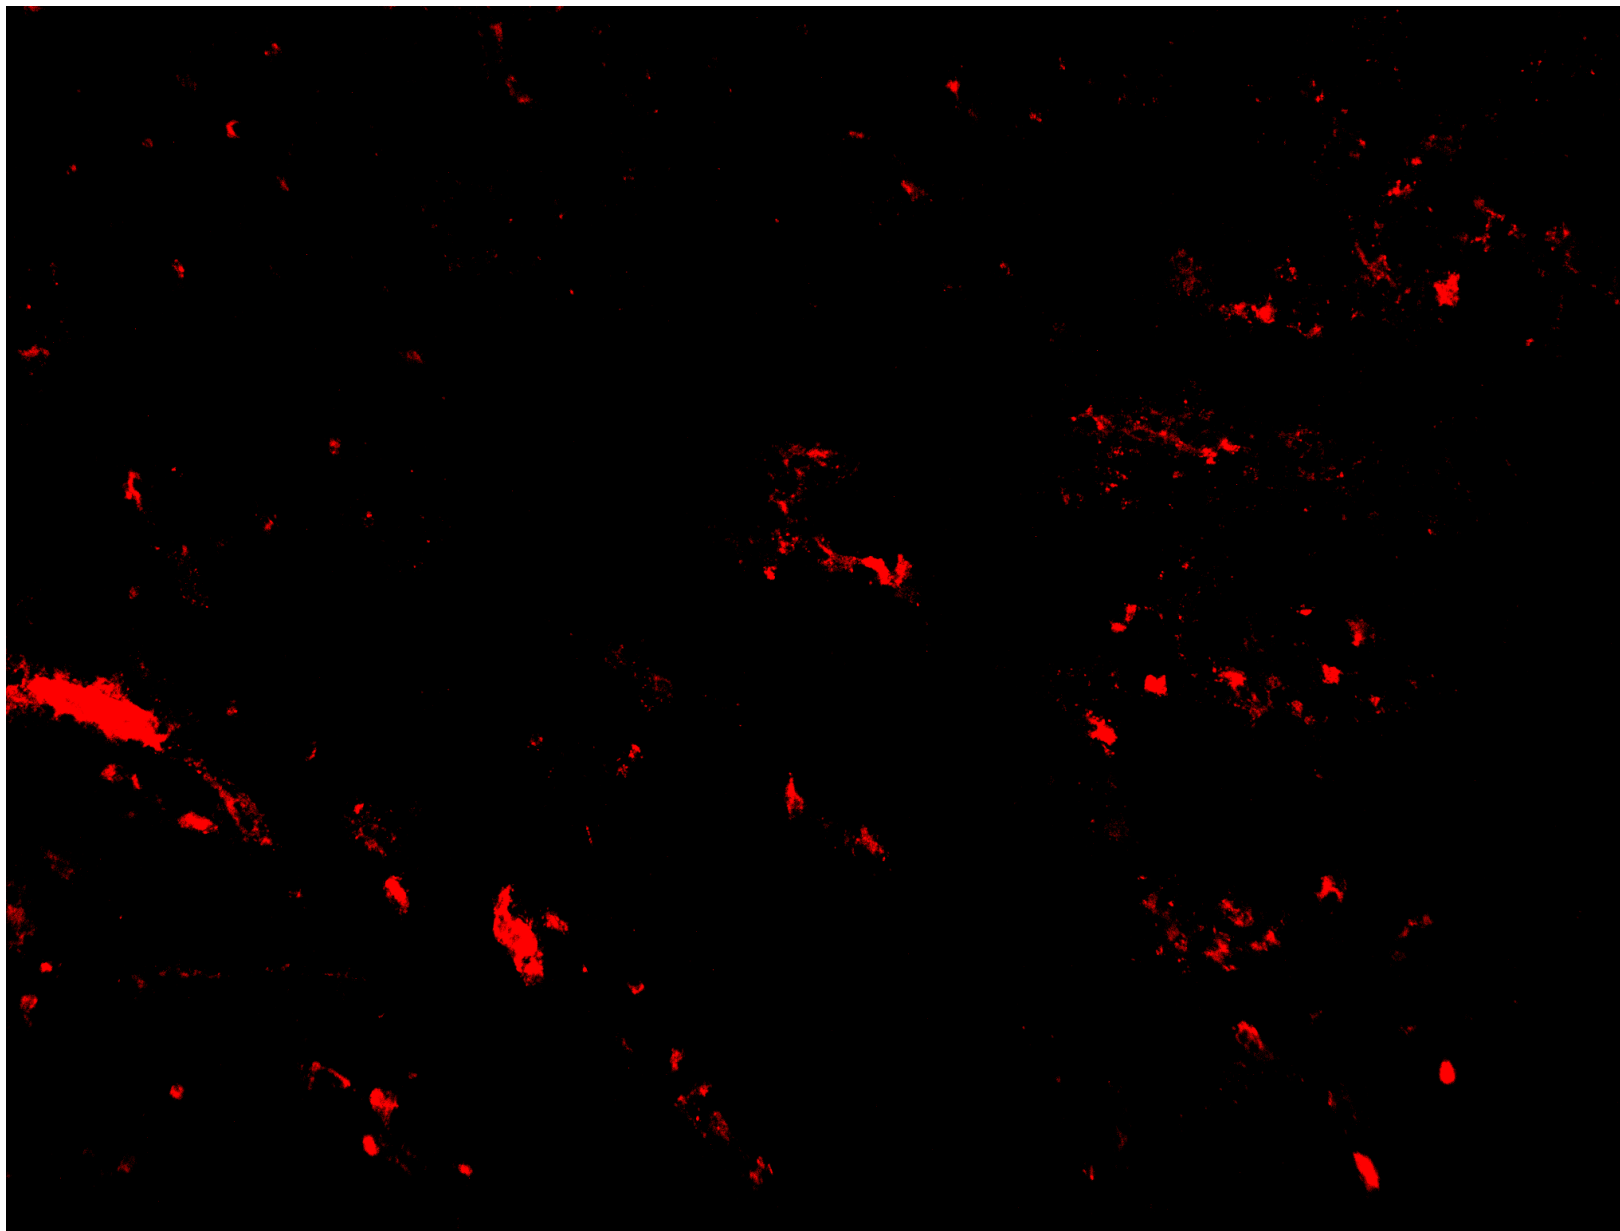

Figure S5C – Upper row  
CTx d4 – TUNEL

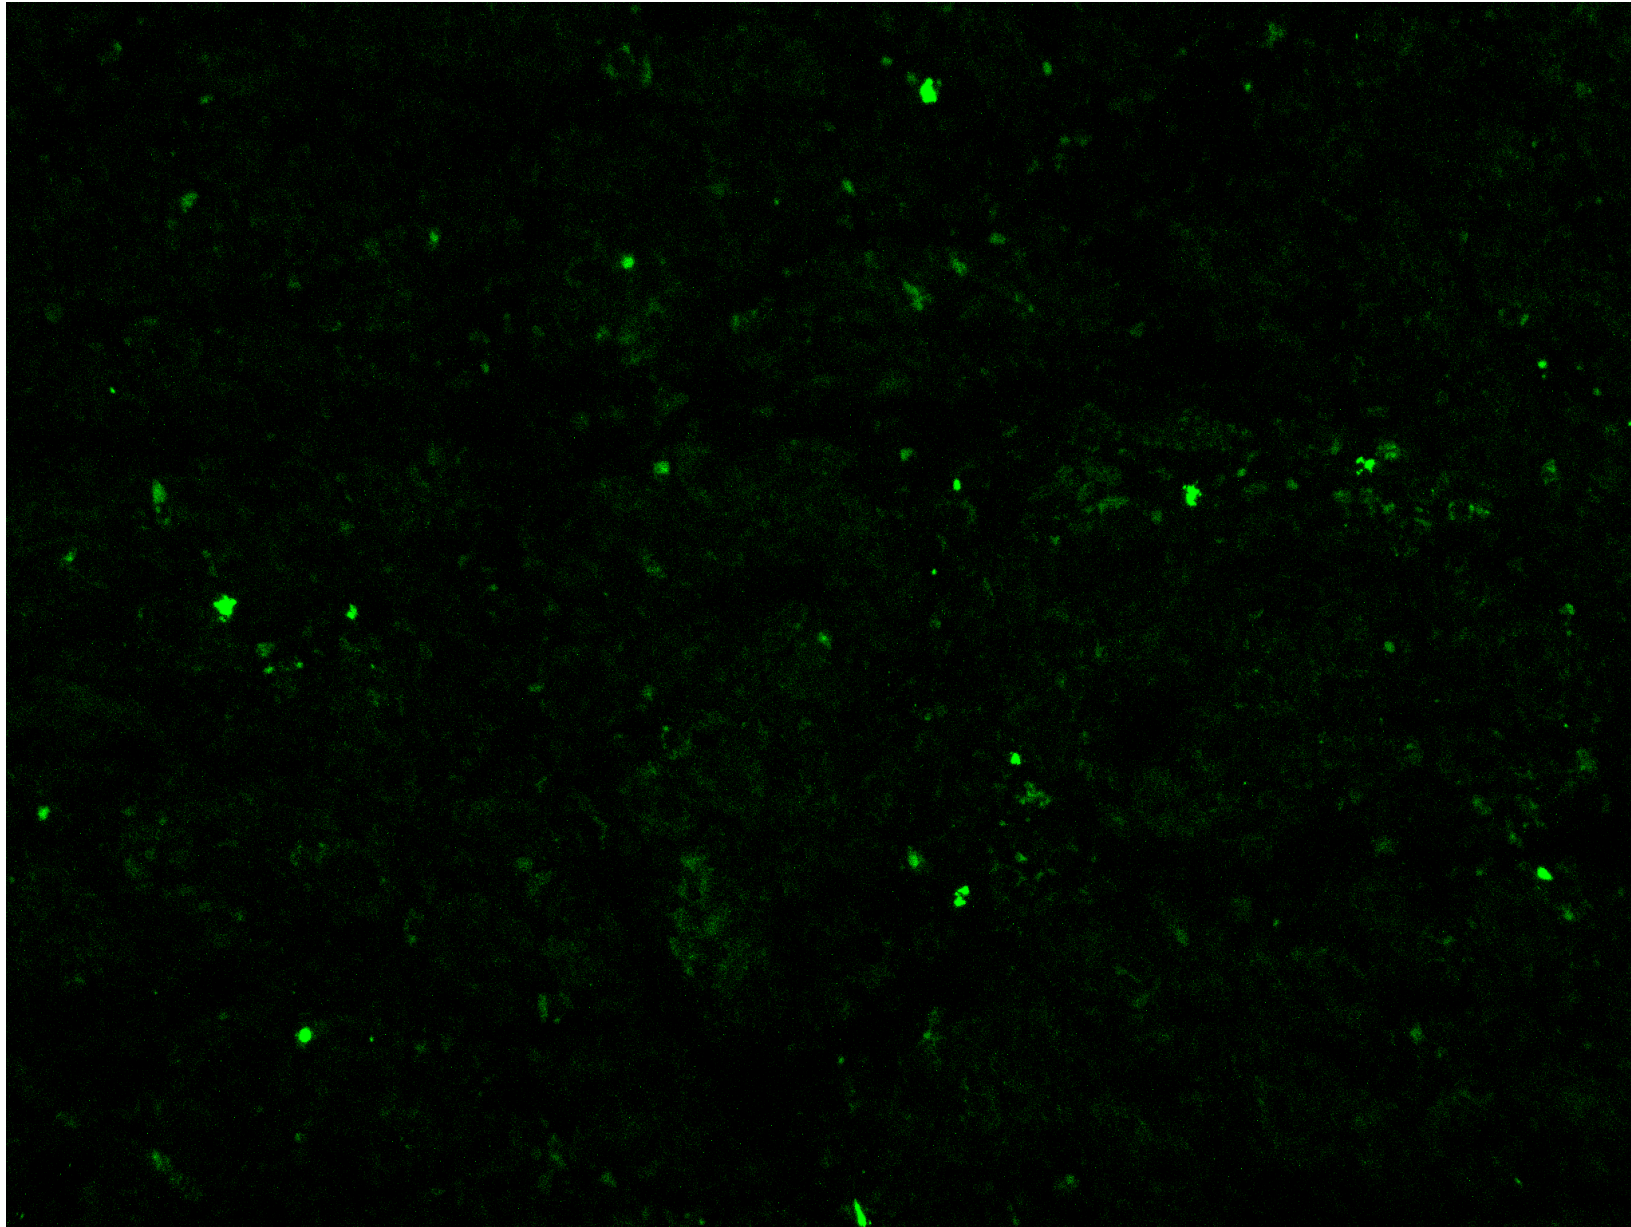

Figure S5C – Upper row  
CTx d5 – DAPI

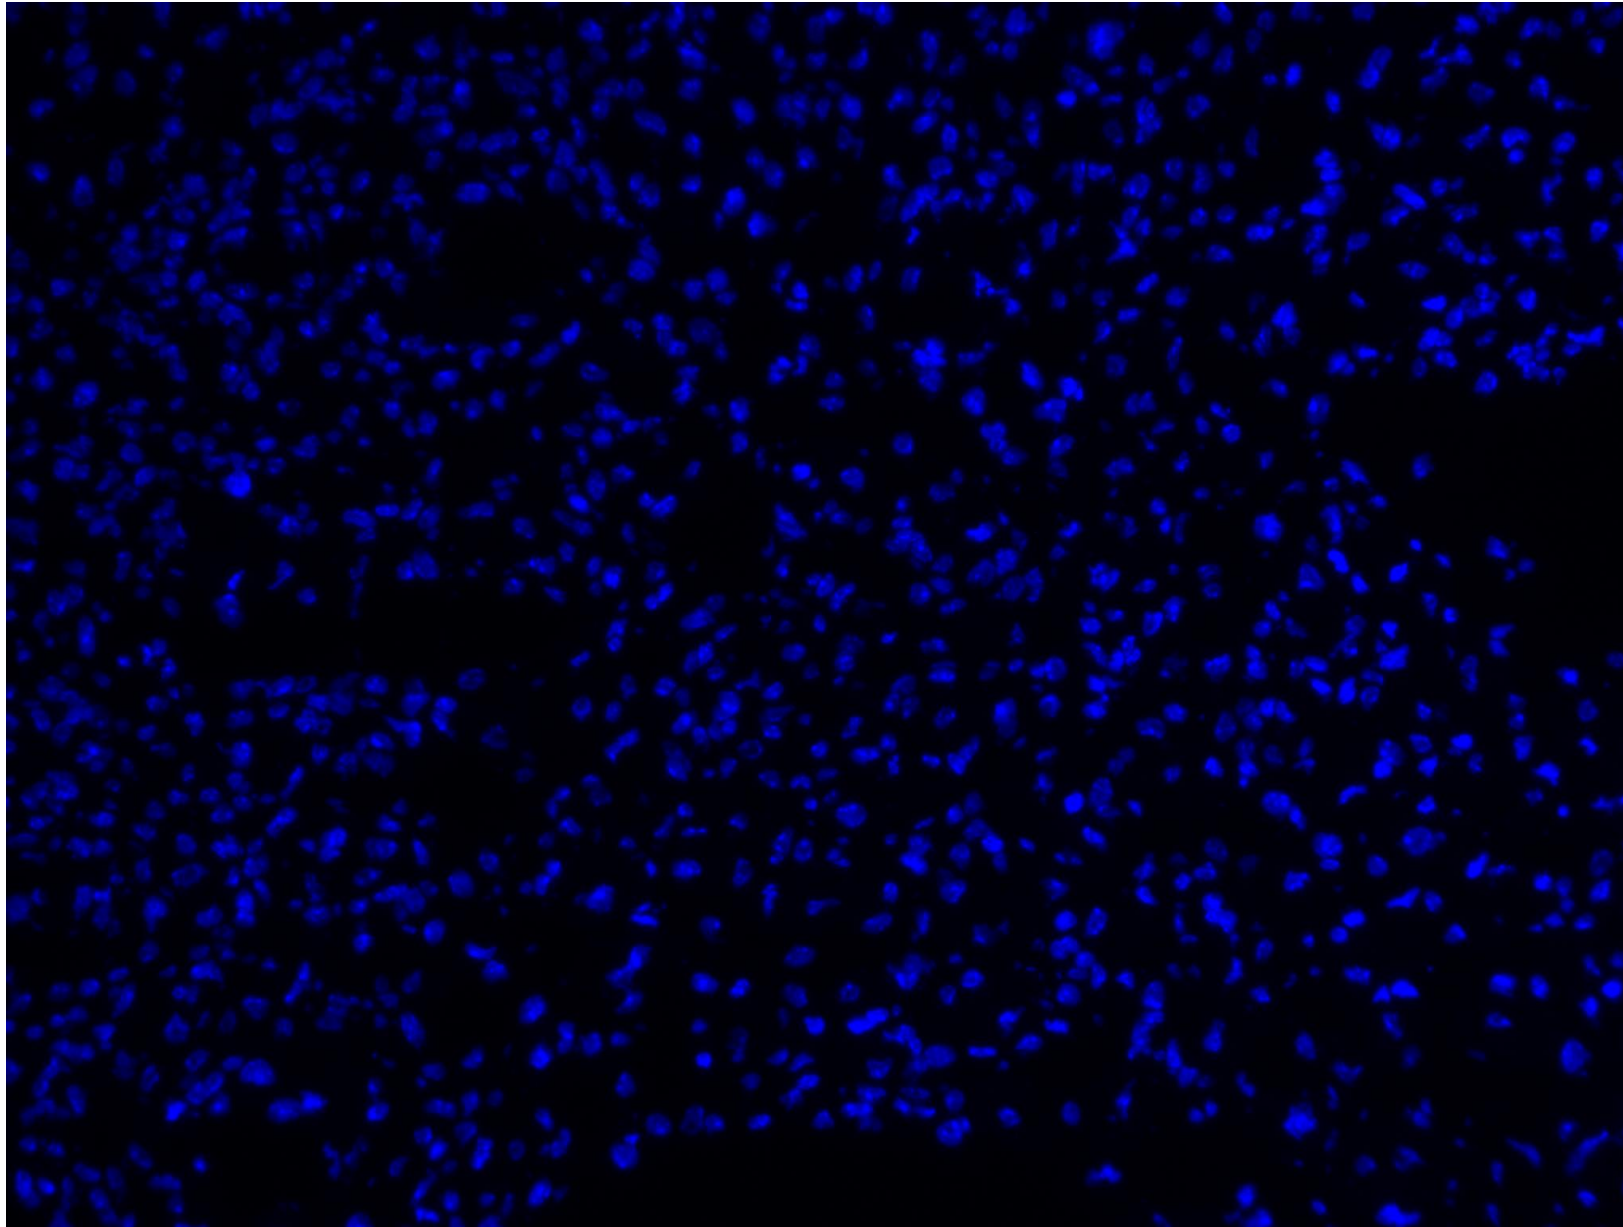

Figure S5C – Upper row  
CTx d5 – Ly6C

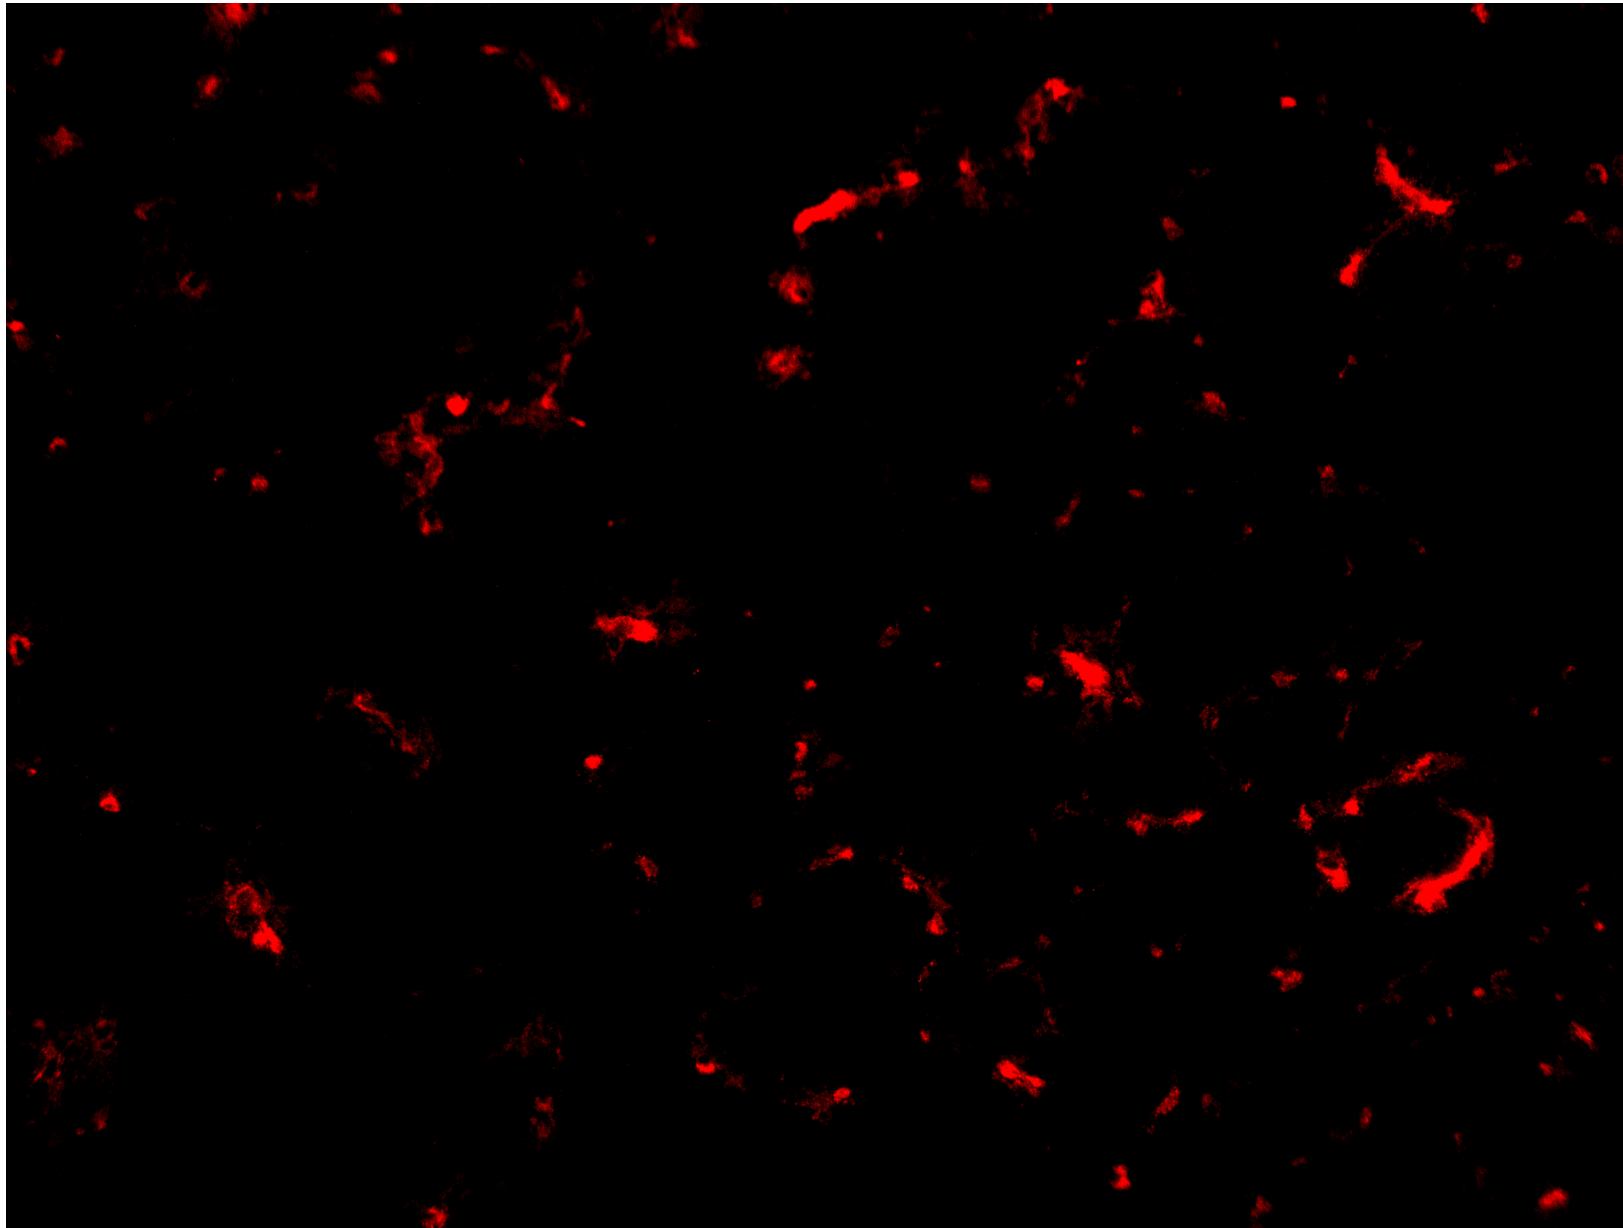

Figure S5C – Upper row  
CTx d5 – TUNEL

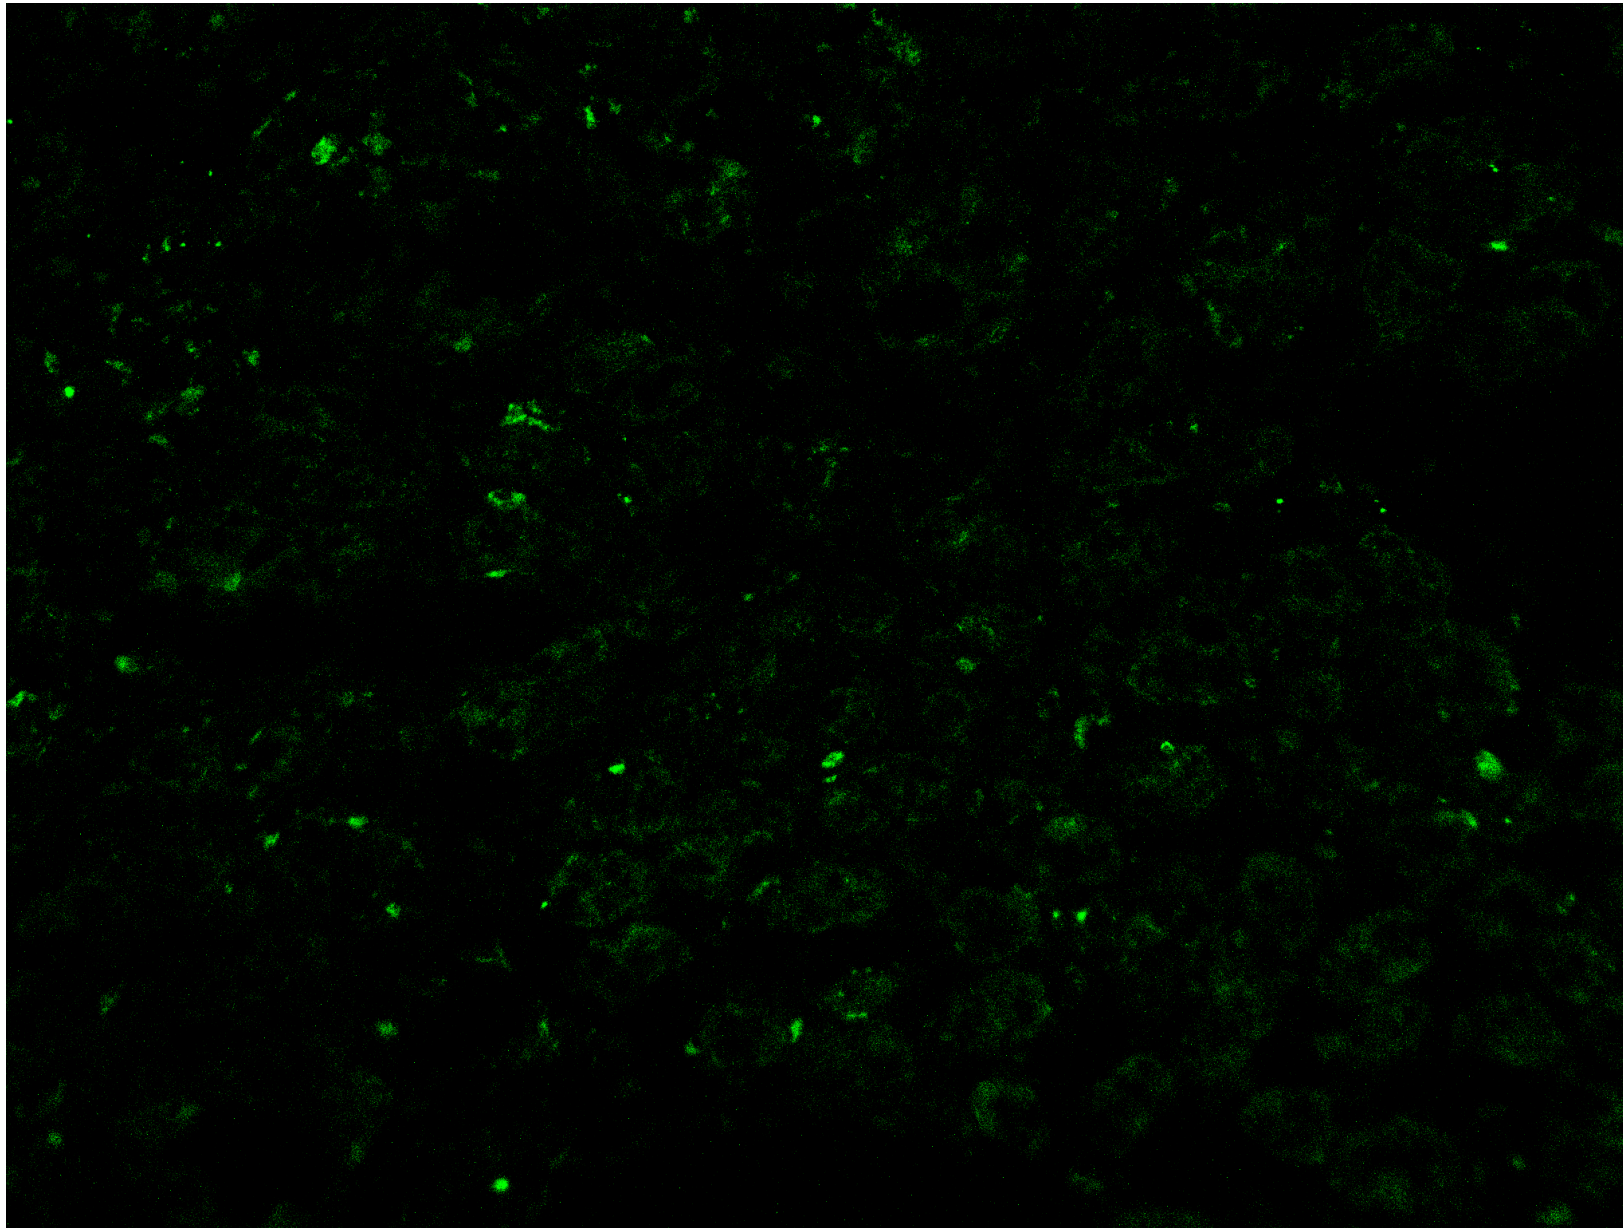

Figure S5C – Middle row  
CTx d0 – DAPI

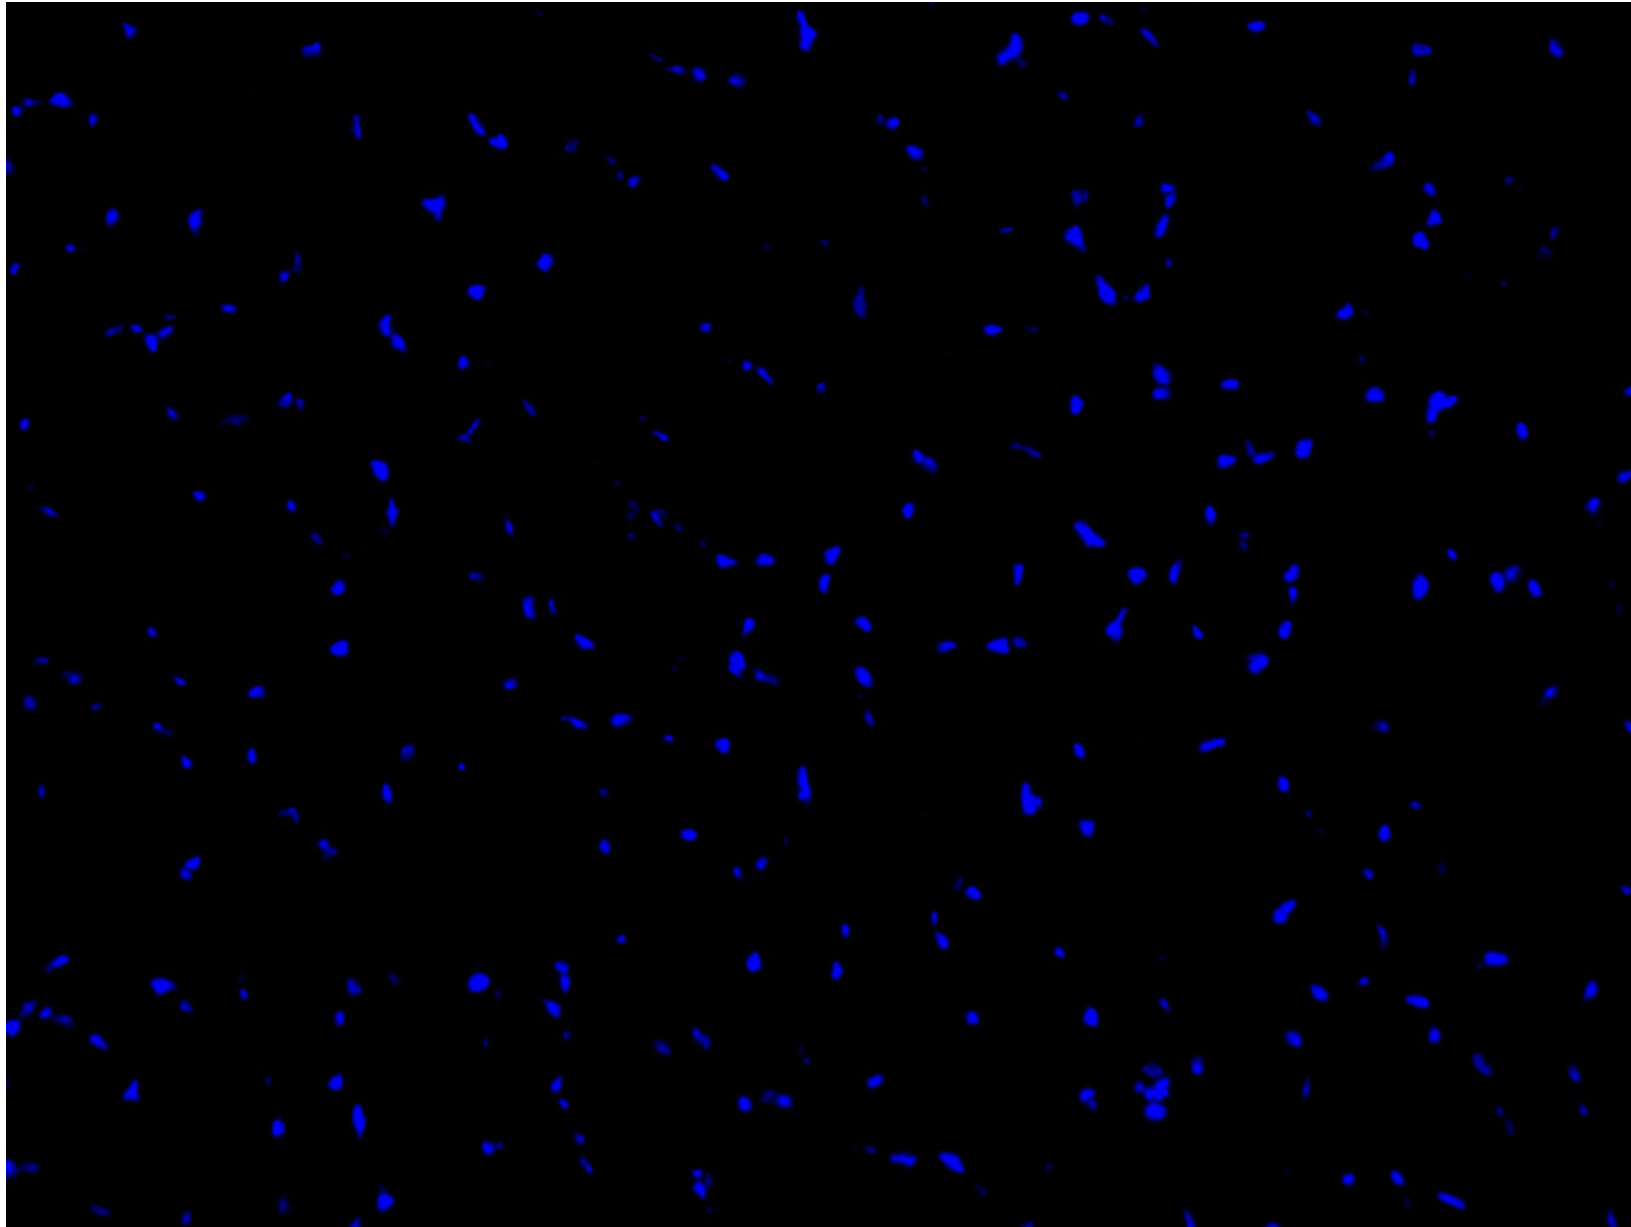

Figure S5C – Middle row

CTx d0 – IL-7R

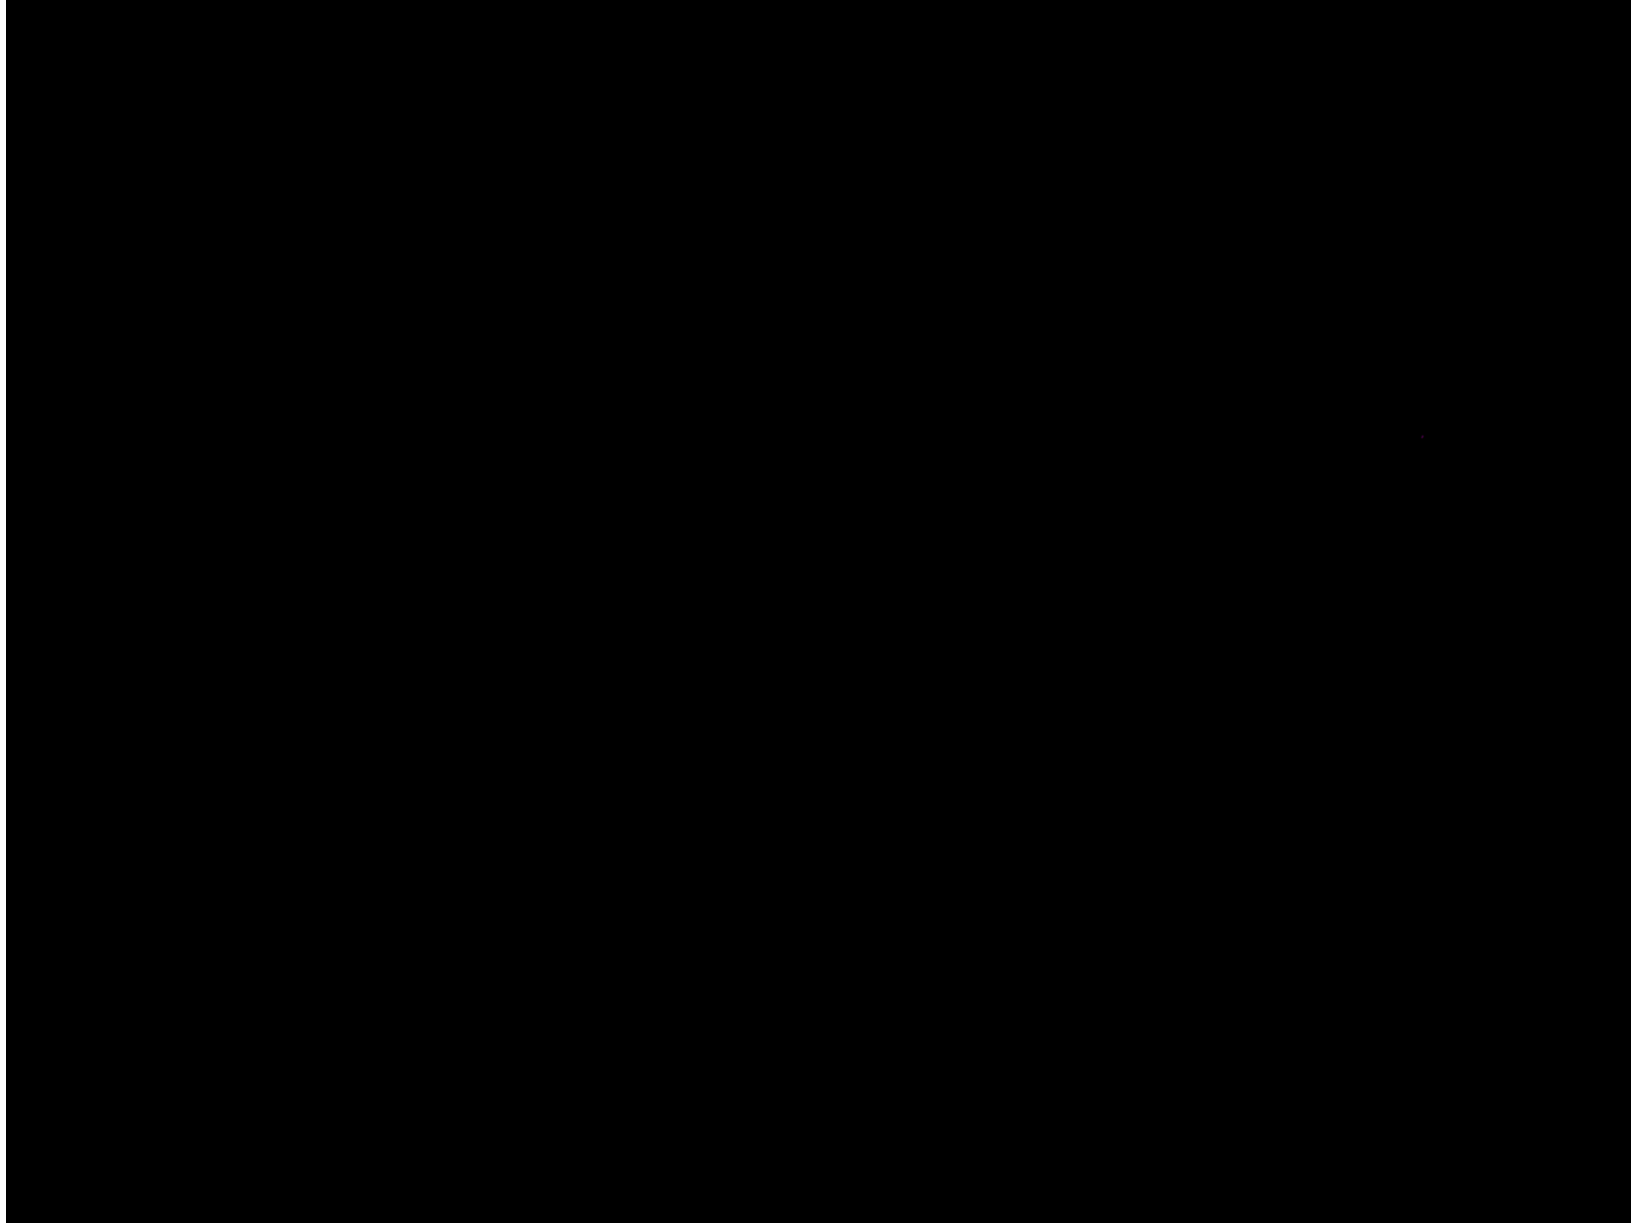

Figure S5C – Middle row

CTx d0 – TUNEL

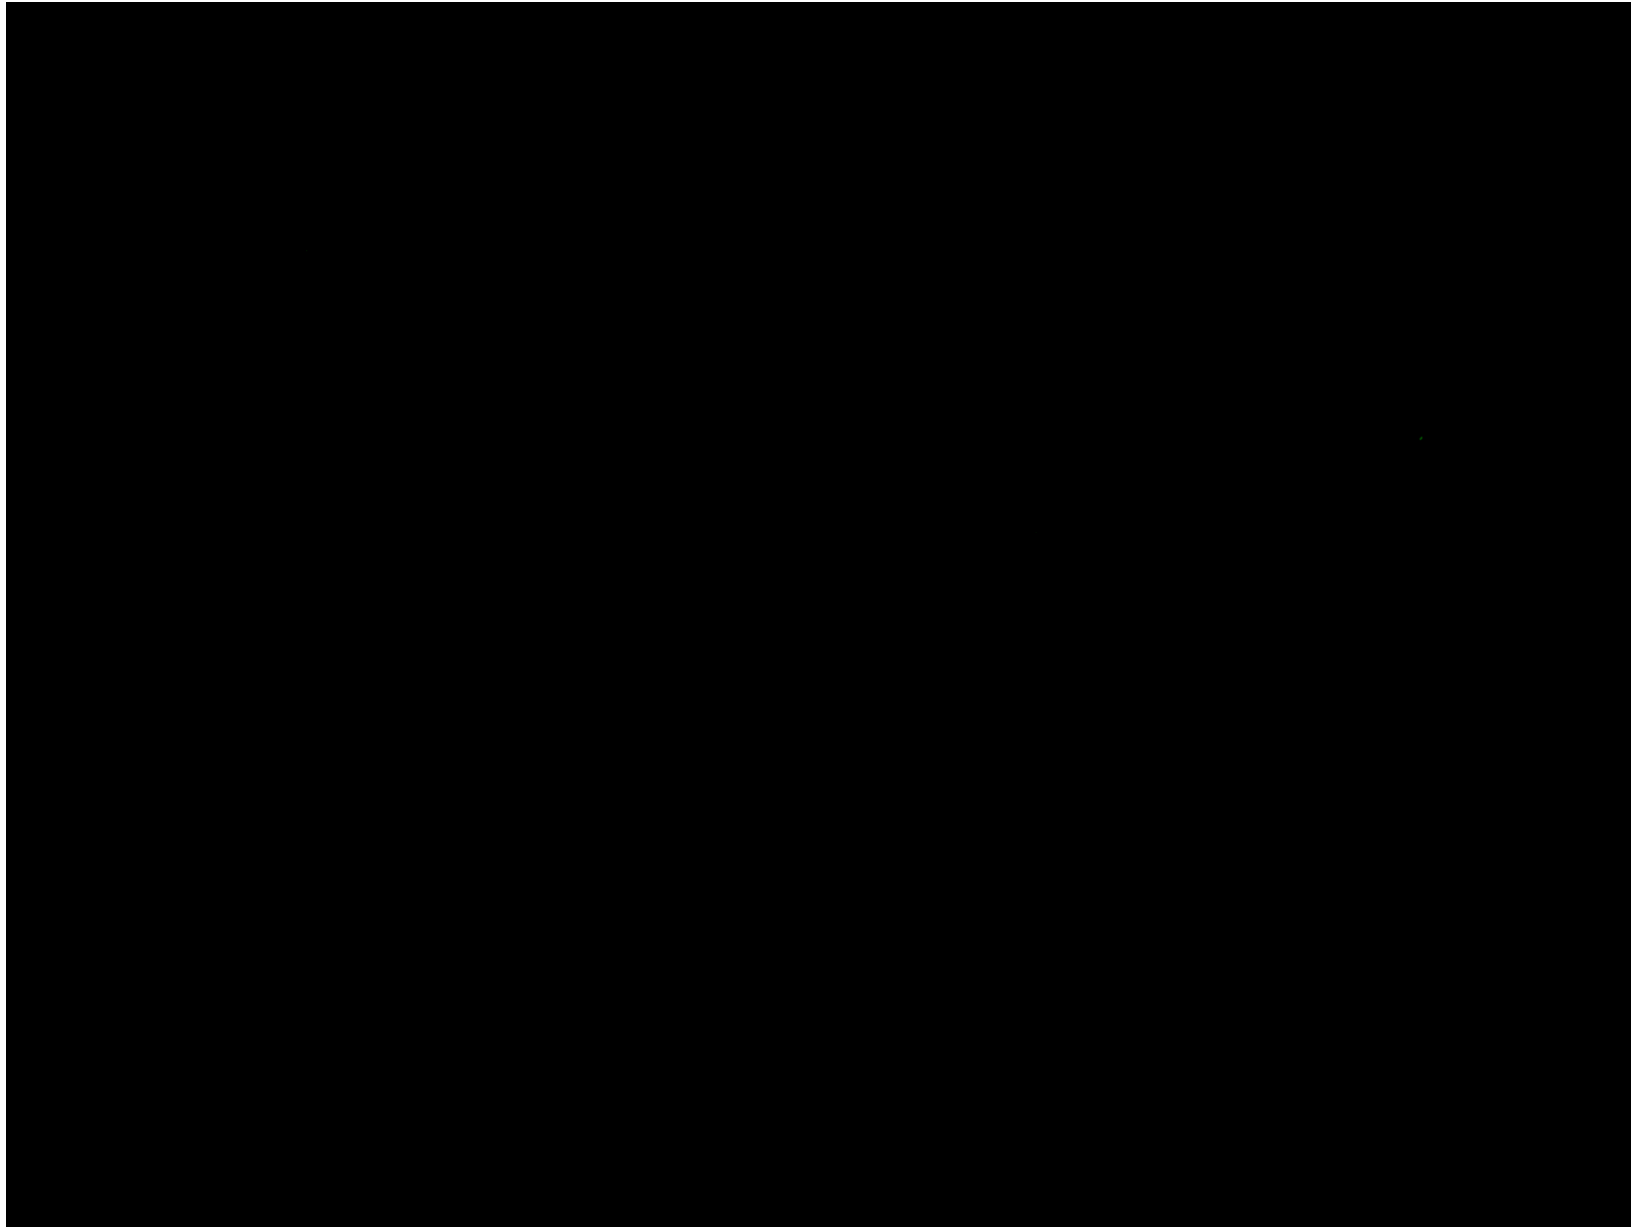

Figure S5C – Middle row  
CTx d3 – DAPI



Figure S5C – Middle row  
CTx d3 – IL-7R

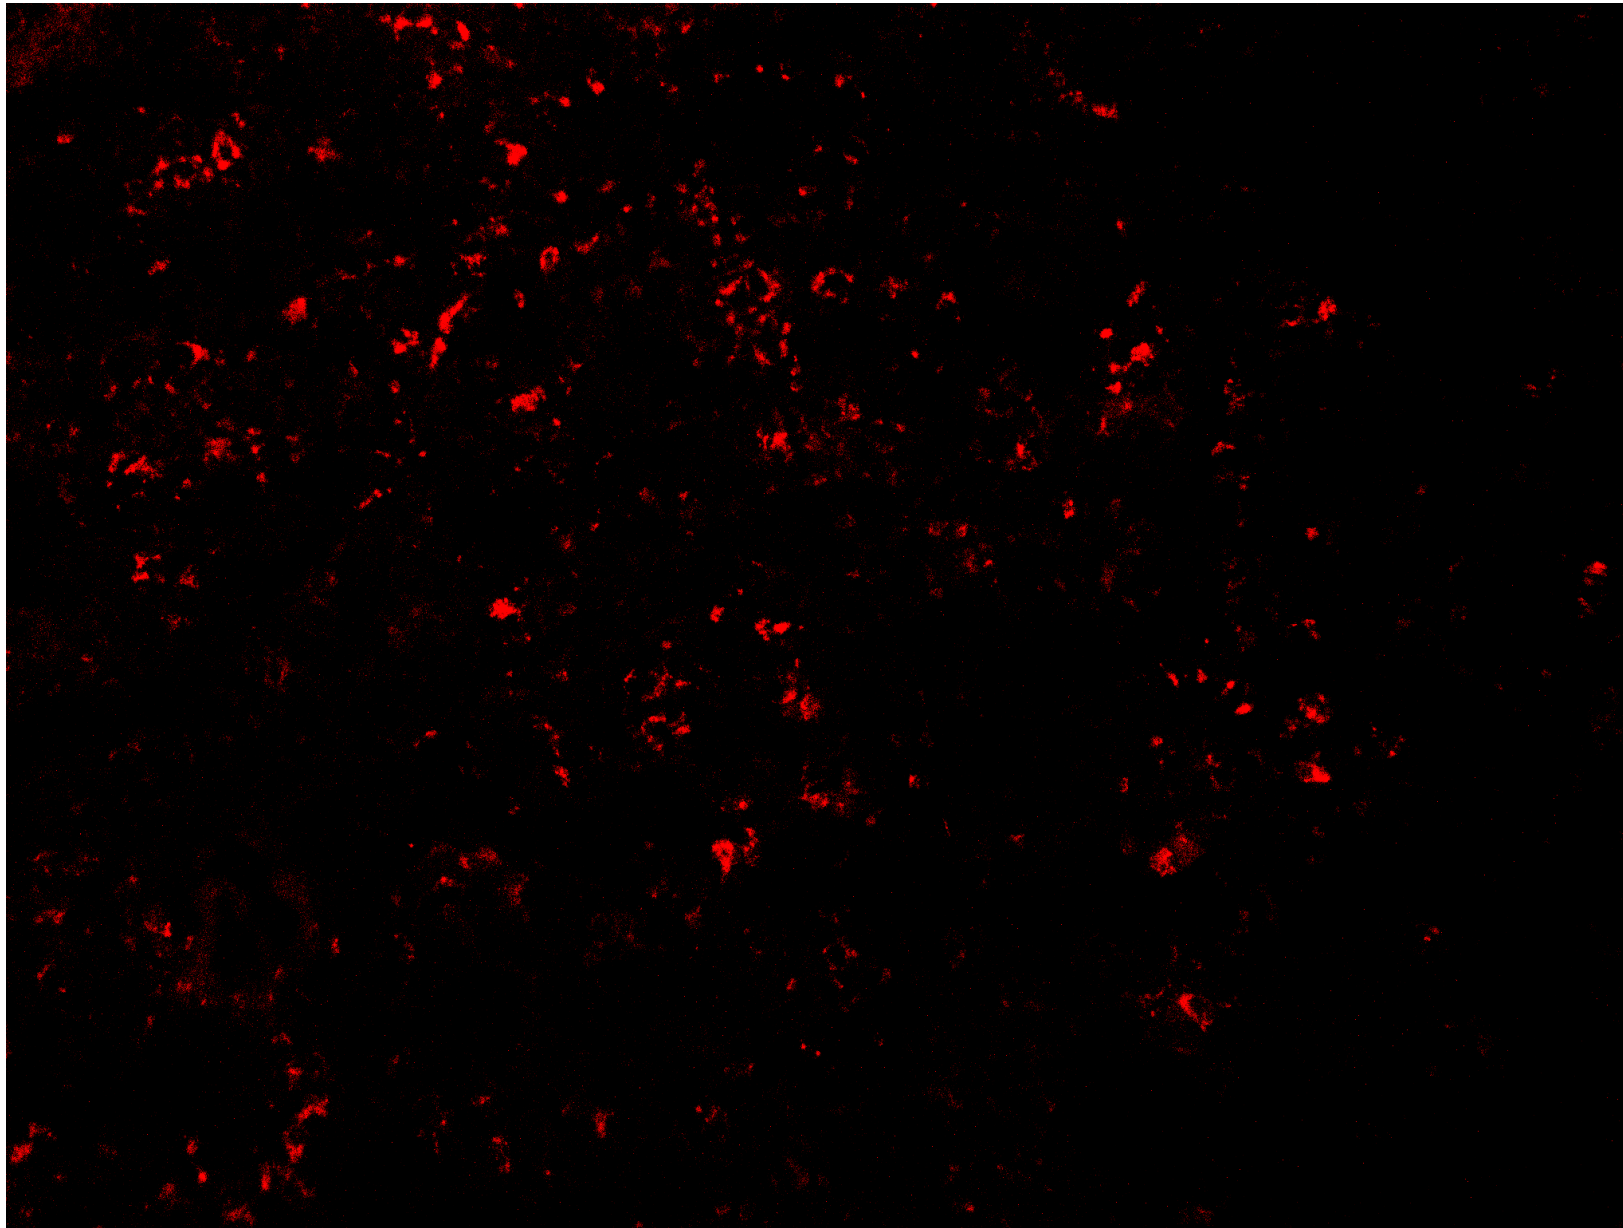

Figure S5C – Middle row  
CTx d3 – TUNEL

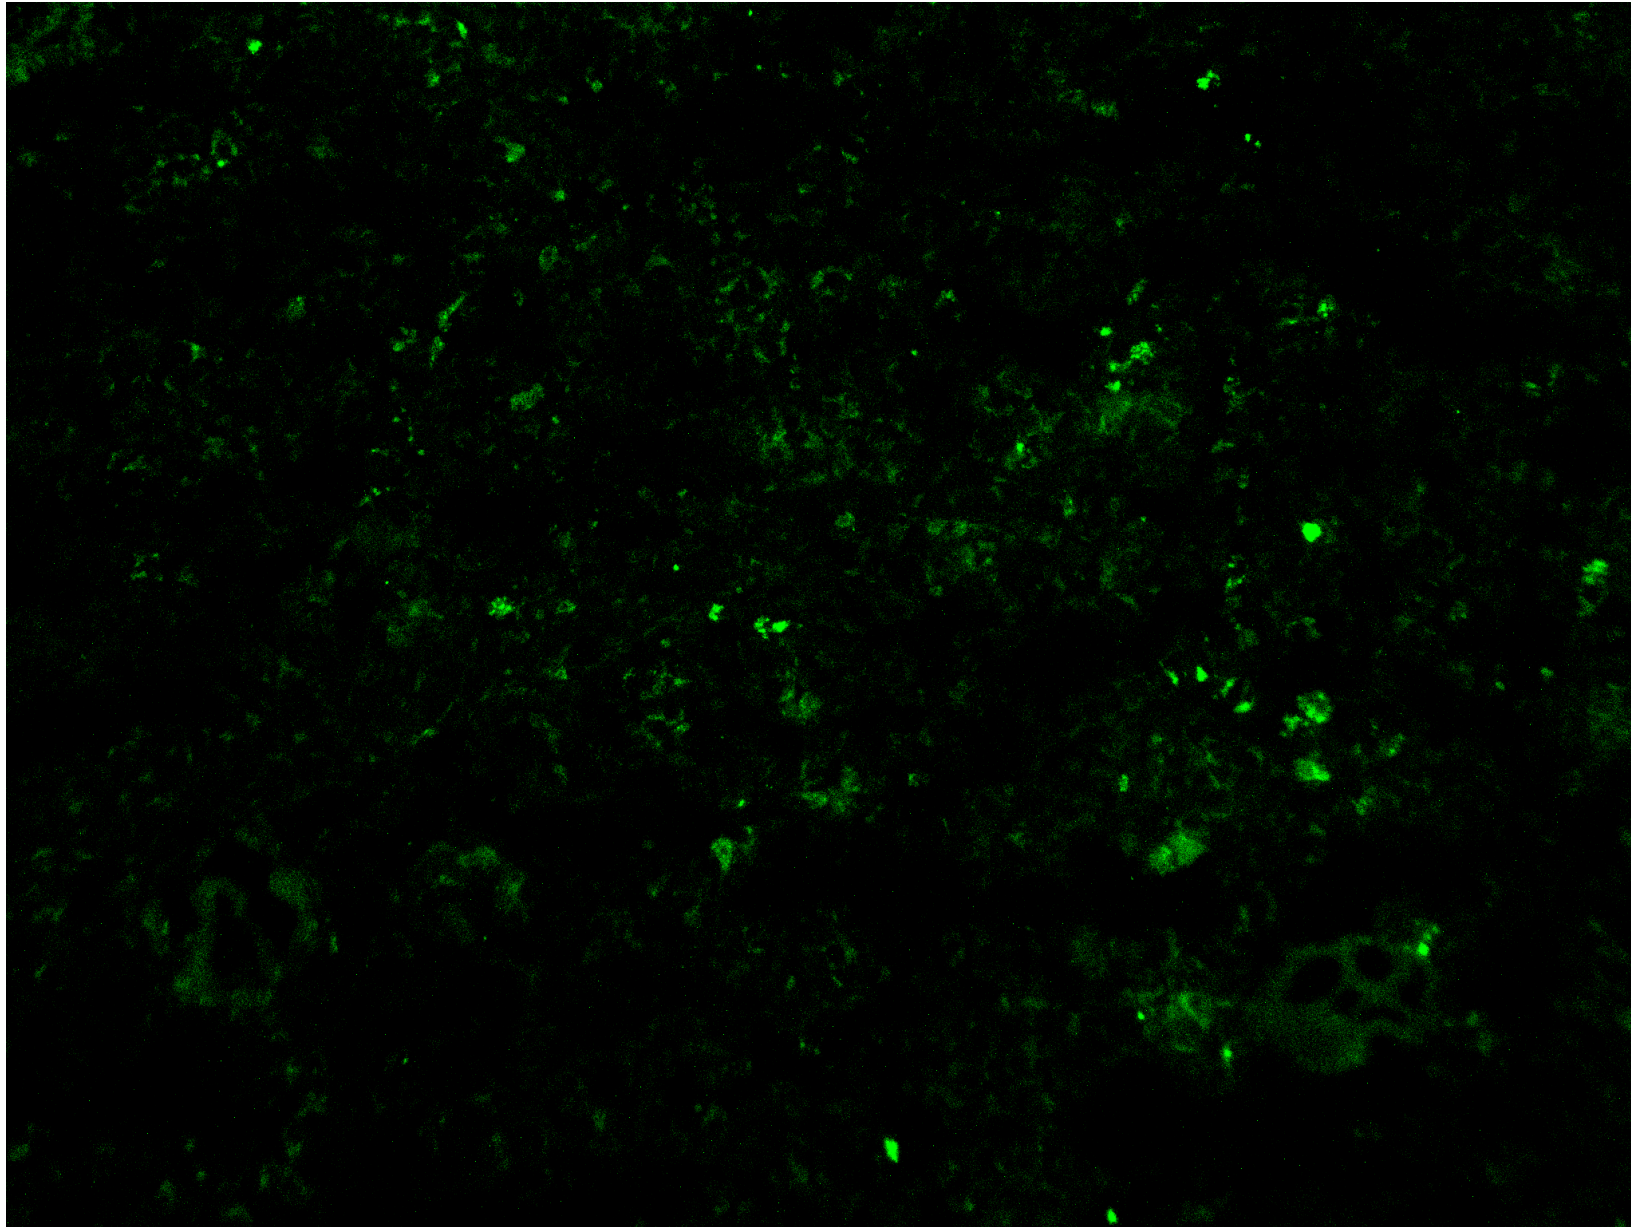

Figure S5C – Middle row  
CTx d4 – DAPI

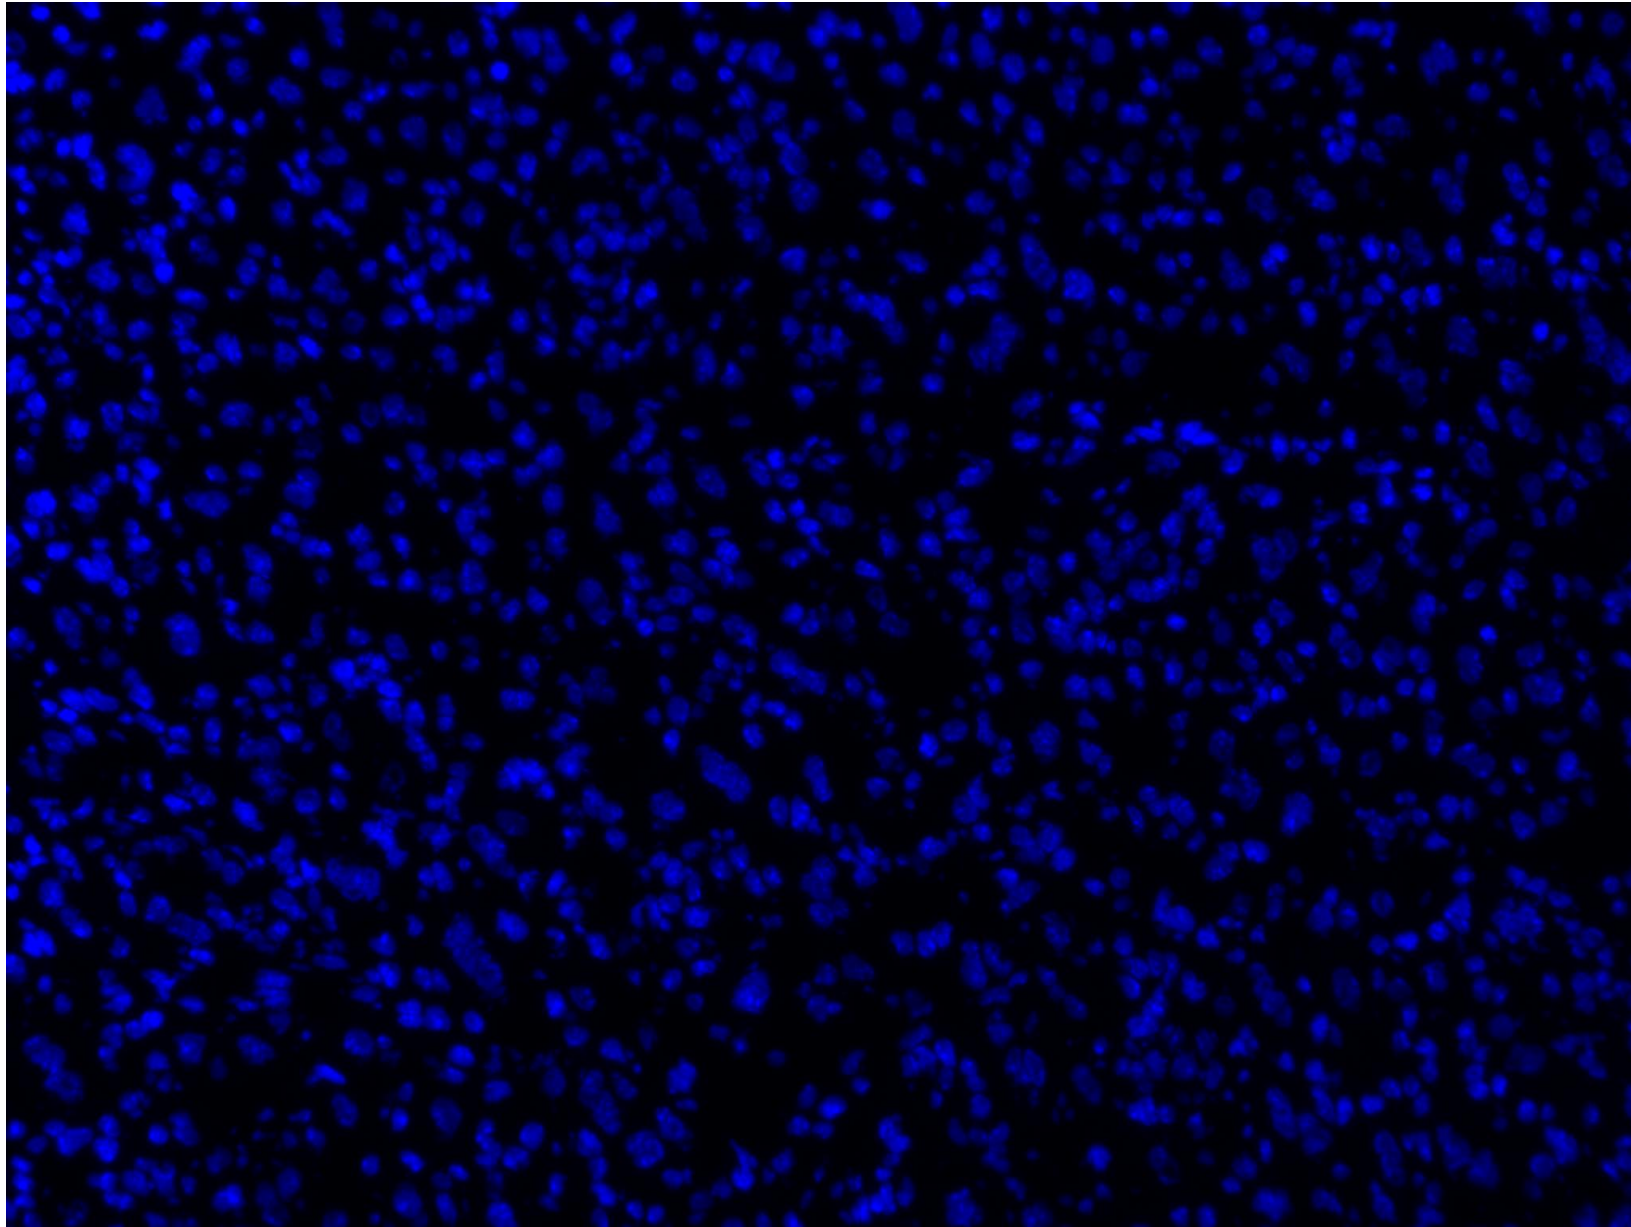

Figure S5C – Middle row  
CTx d4 – IL-7R

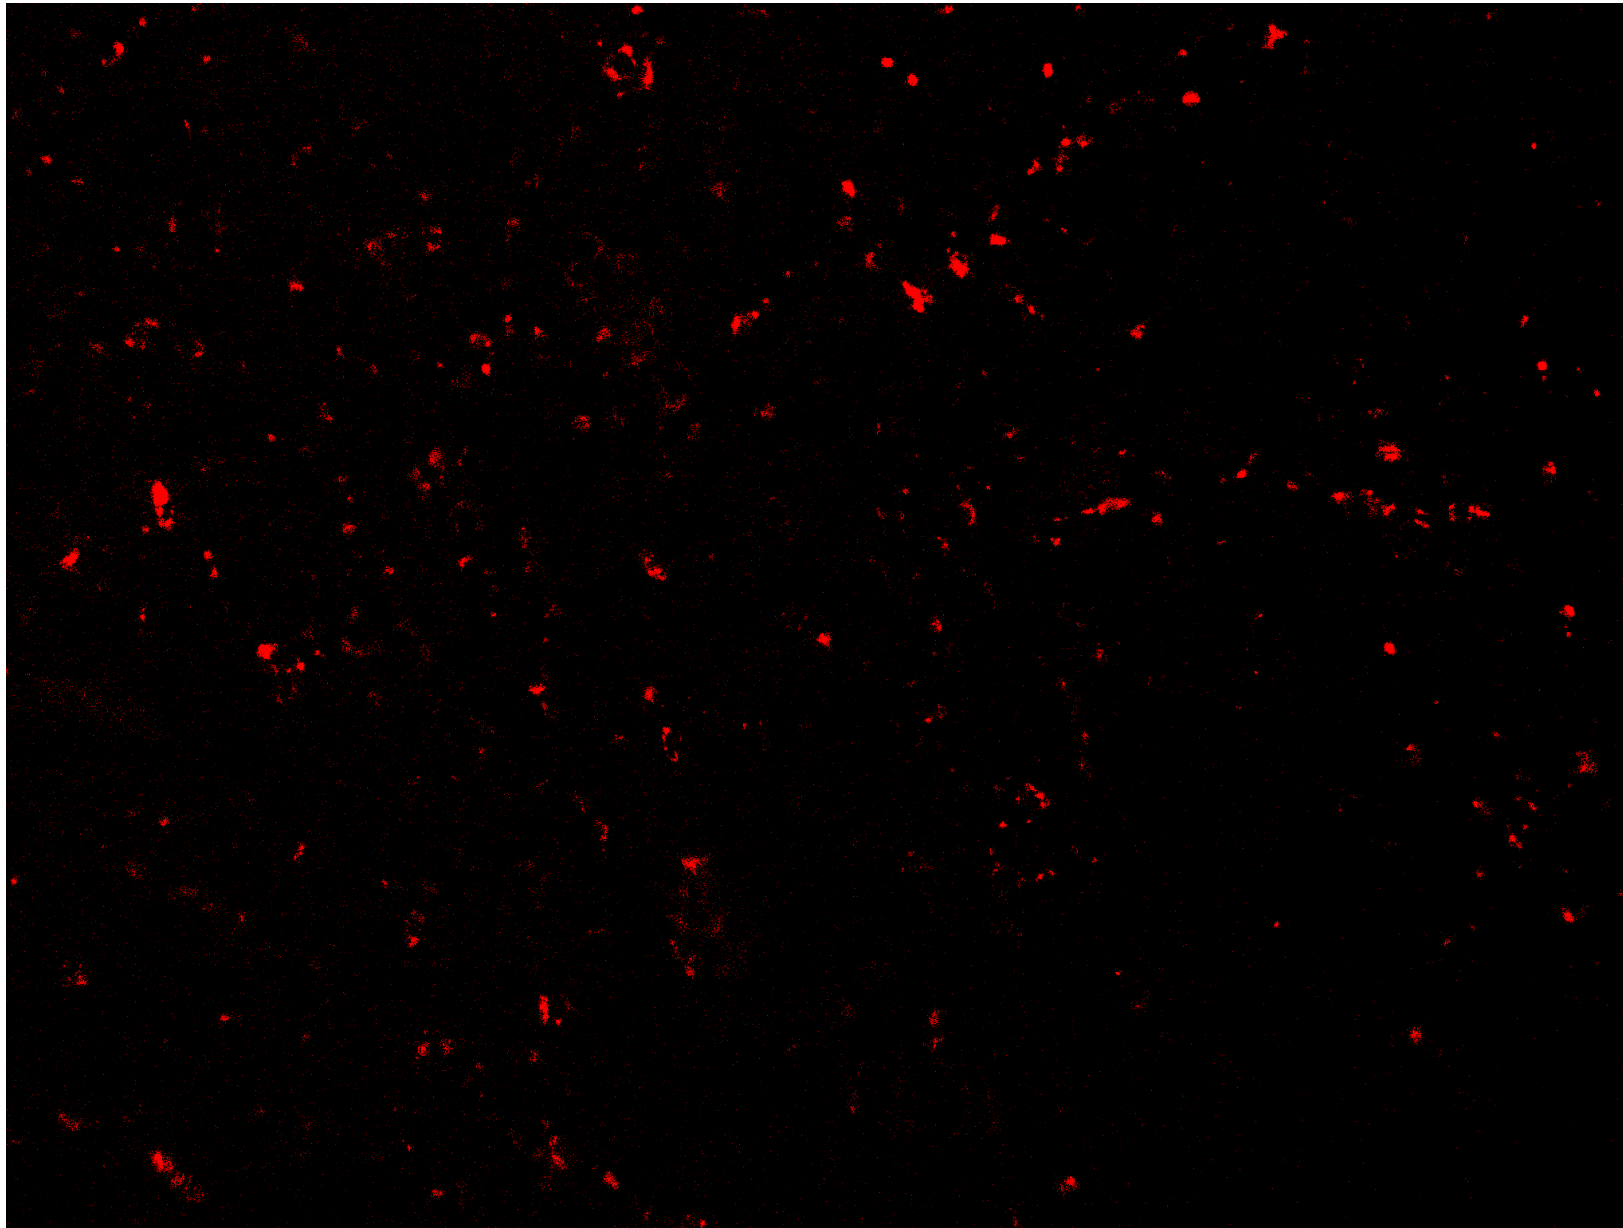

Figure S5C – Middle row  
CTx d4 – TUNEL

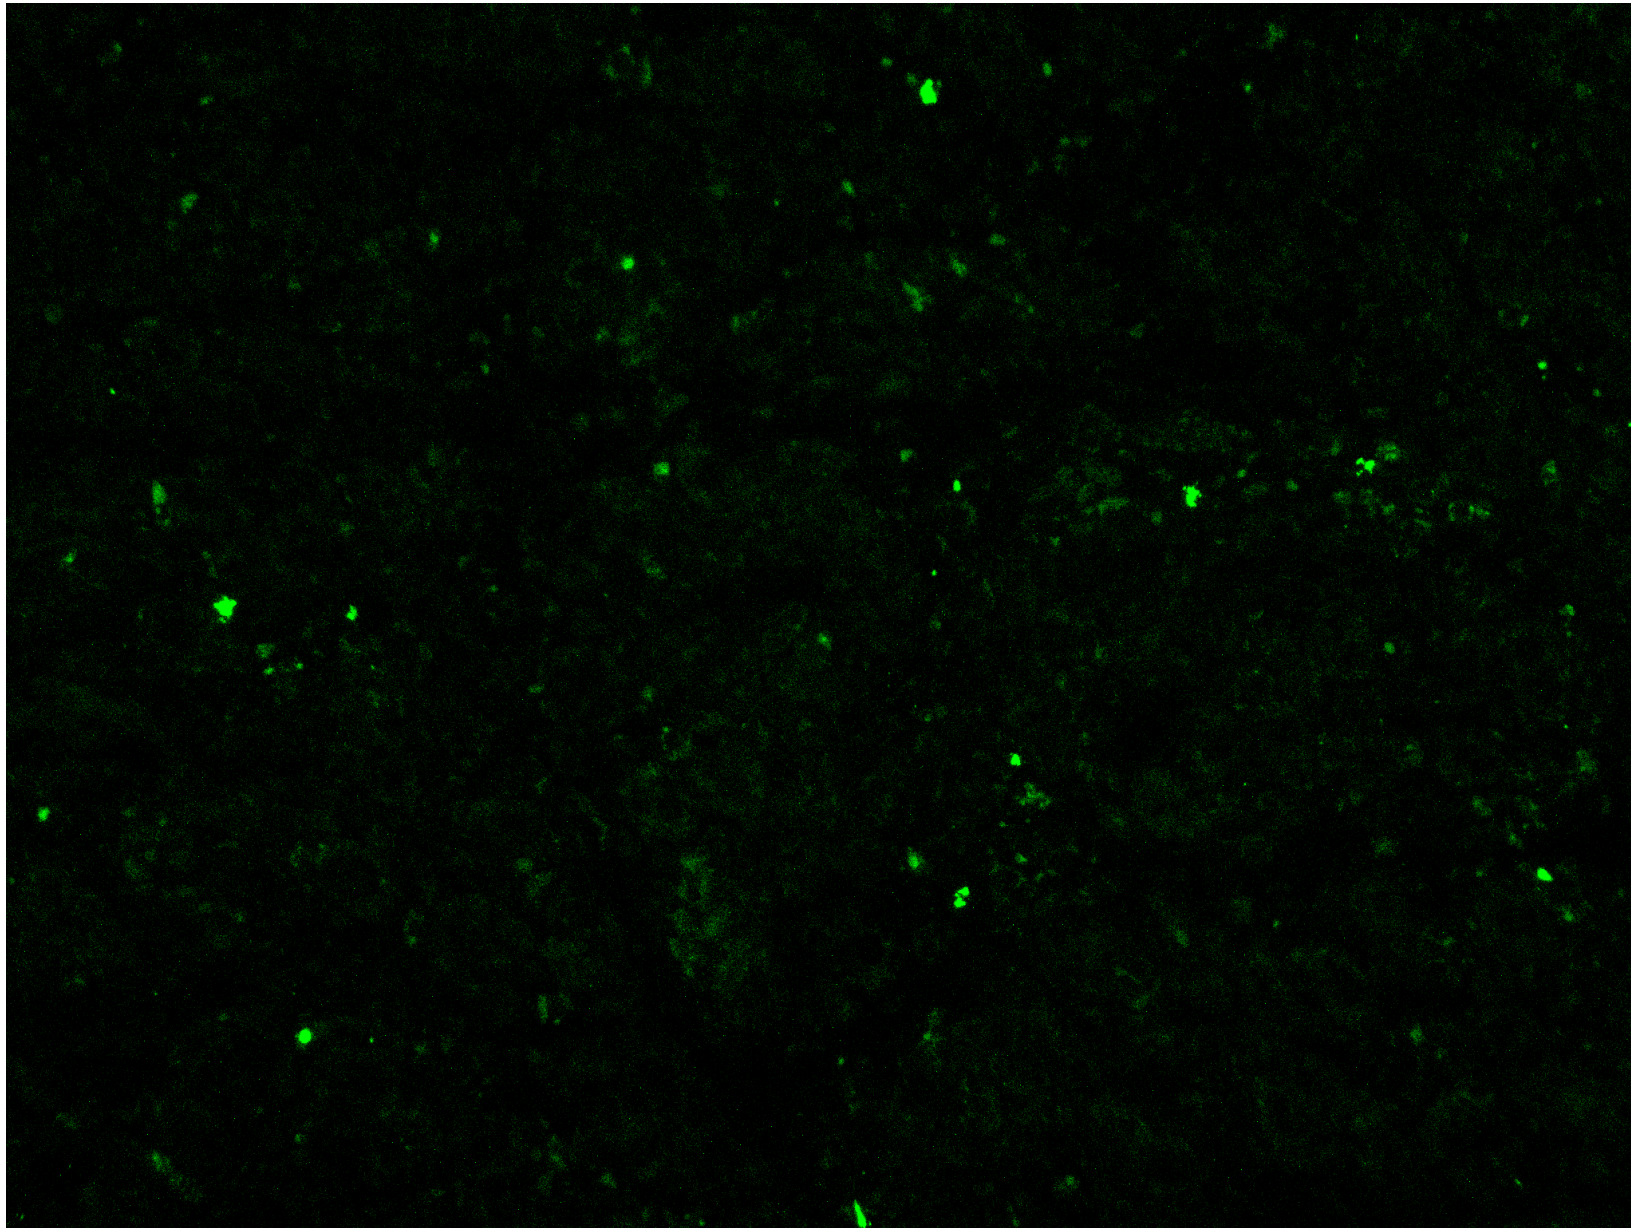

Figure S5C – Middle row  
CTx d5 – DAPI

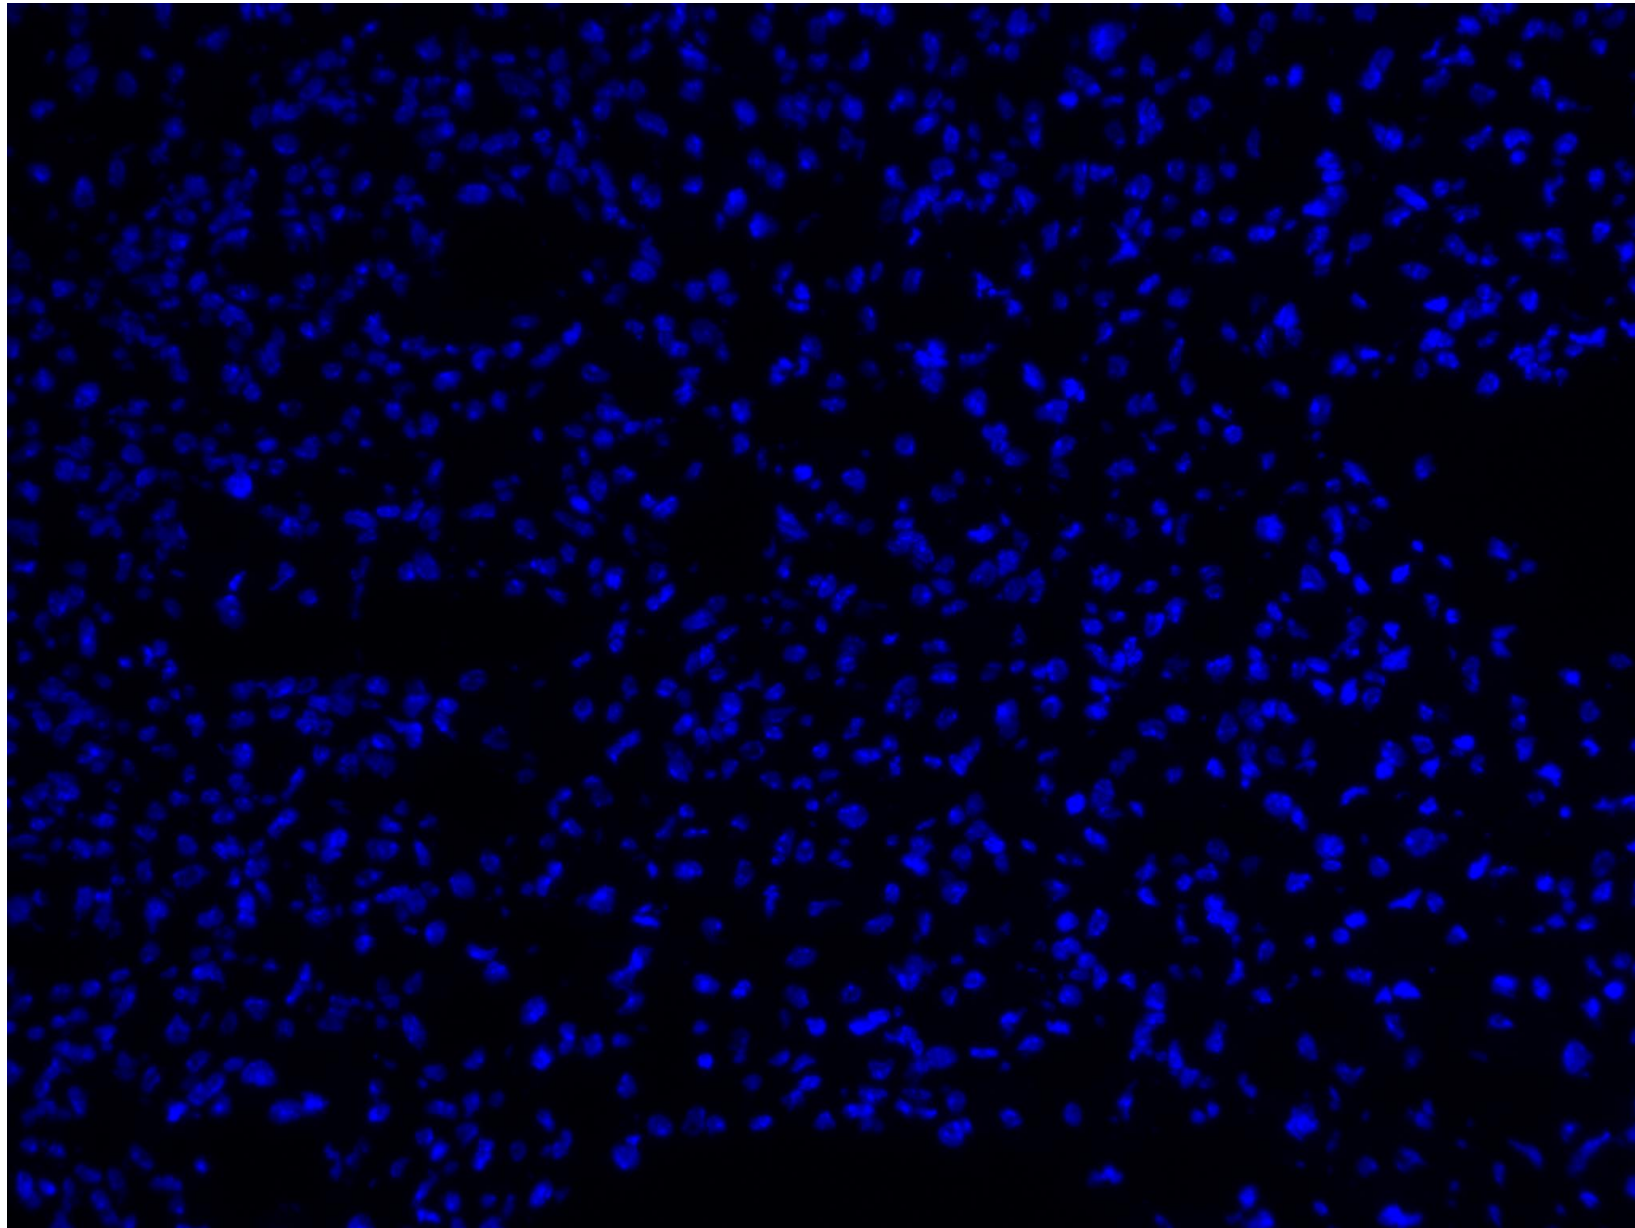

Figure S5C – Middle row  
CTx d5 – IL-7R

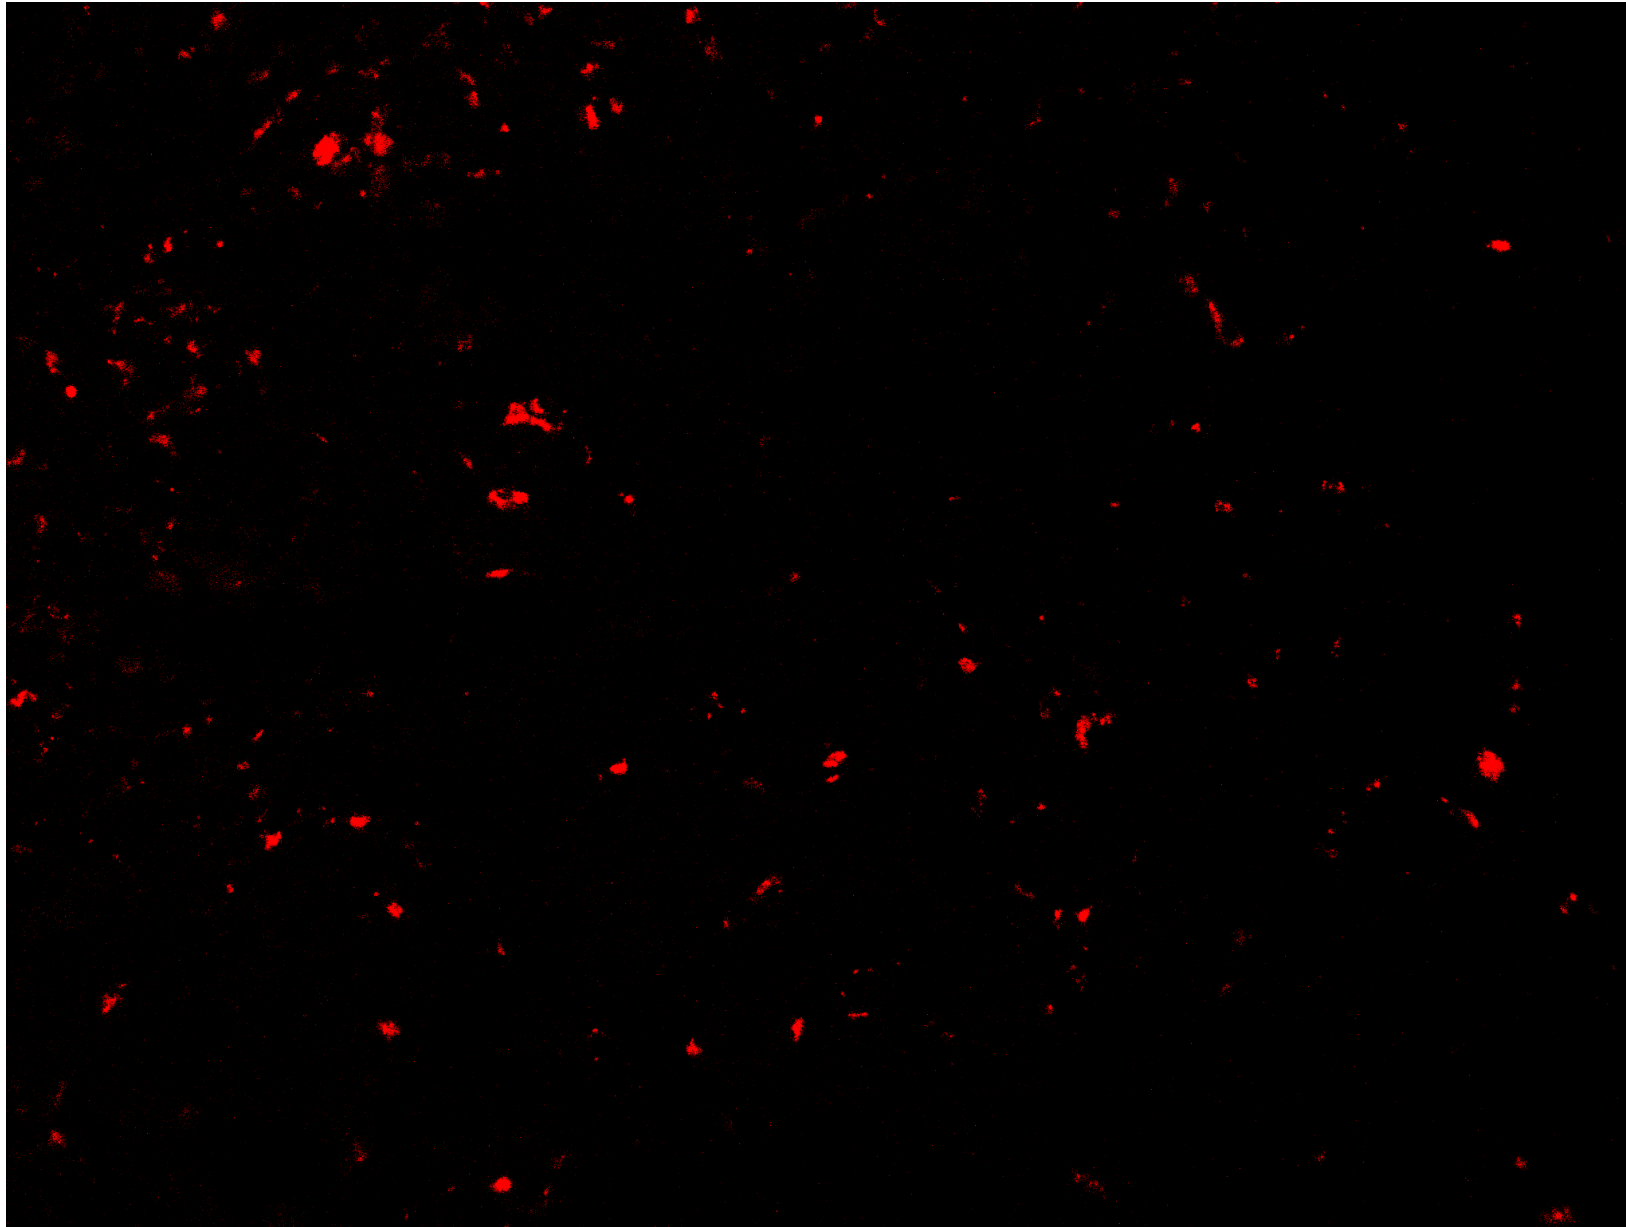

Figure S5C – Middle row  
CTx d5 – TUNEL

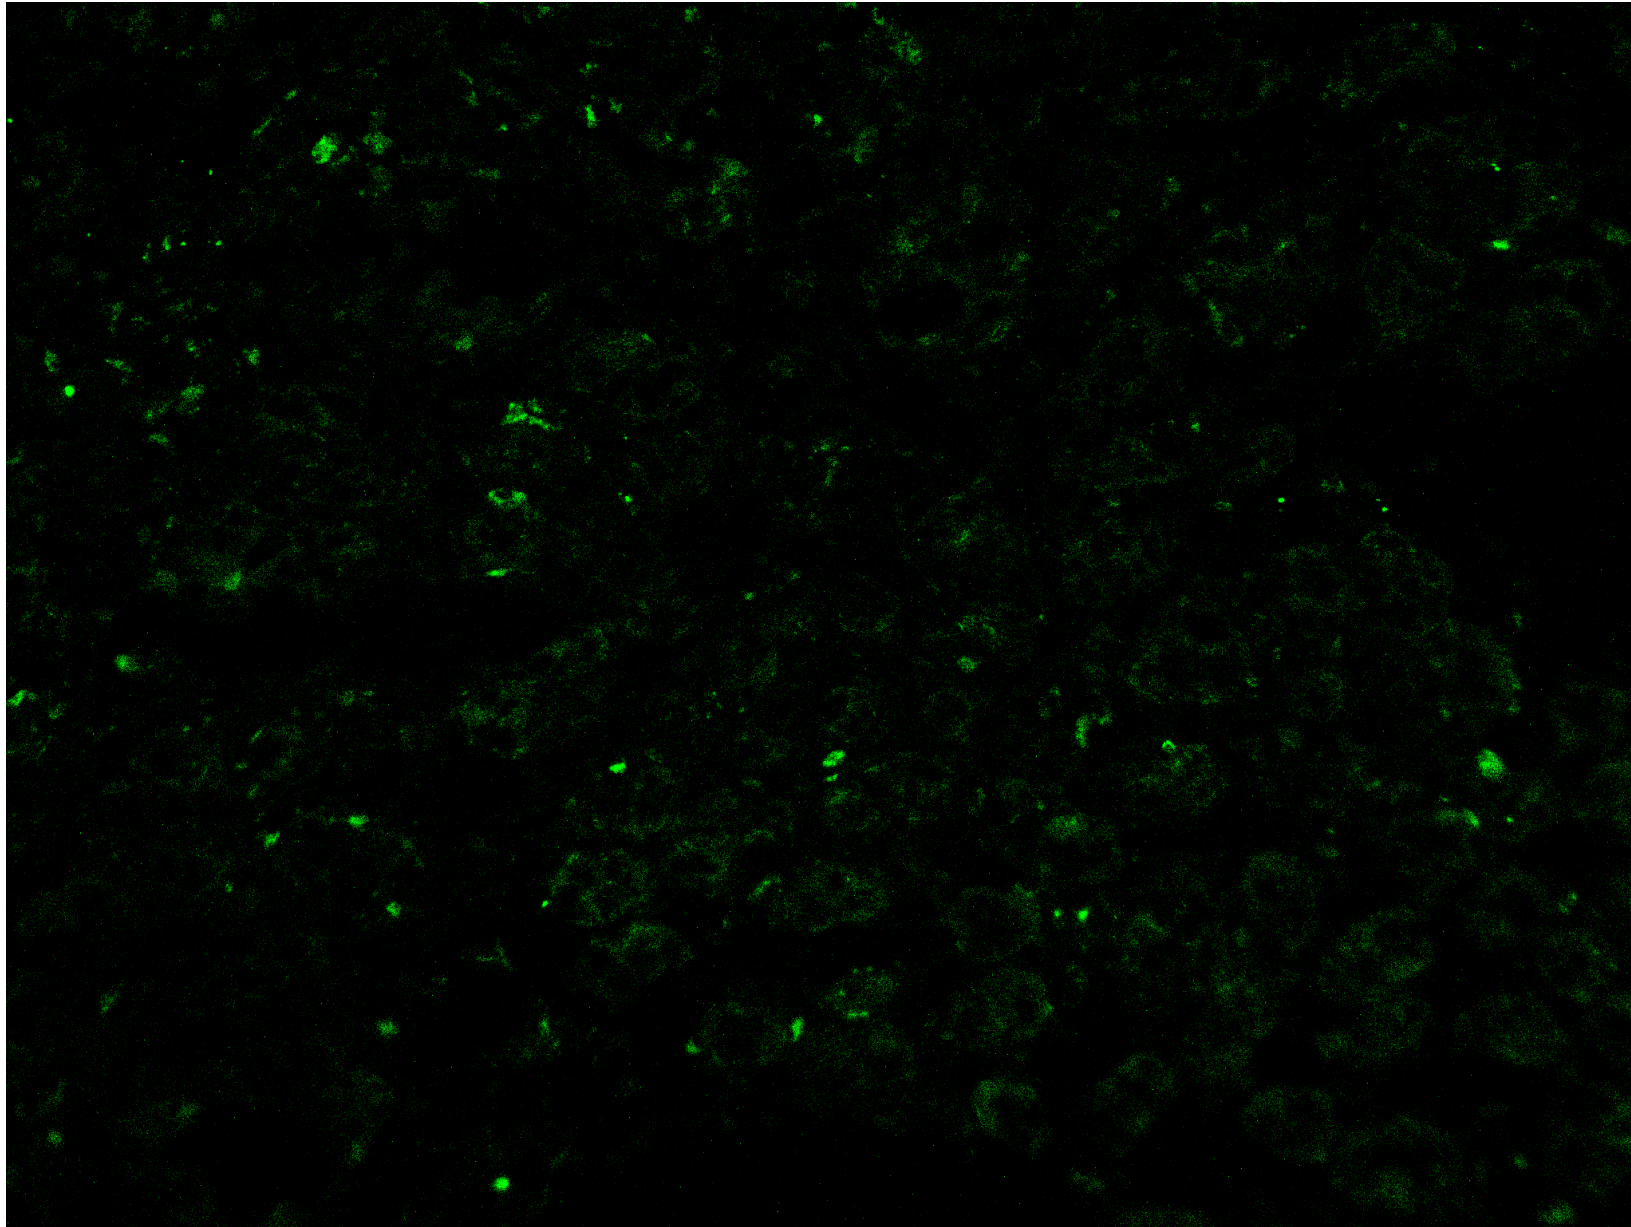

Figure S5C – Bottom row

CTx d0 – DAPI

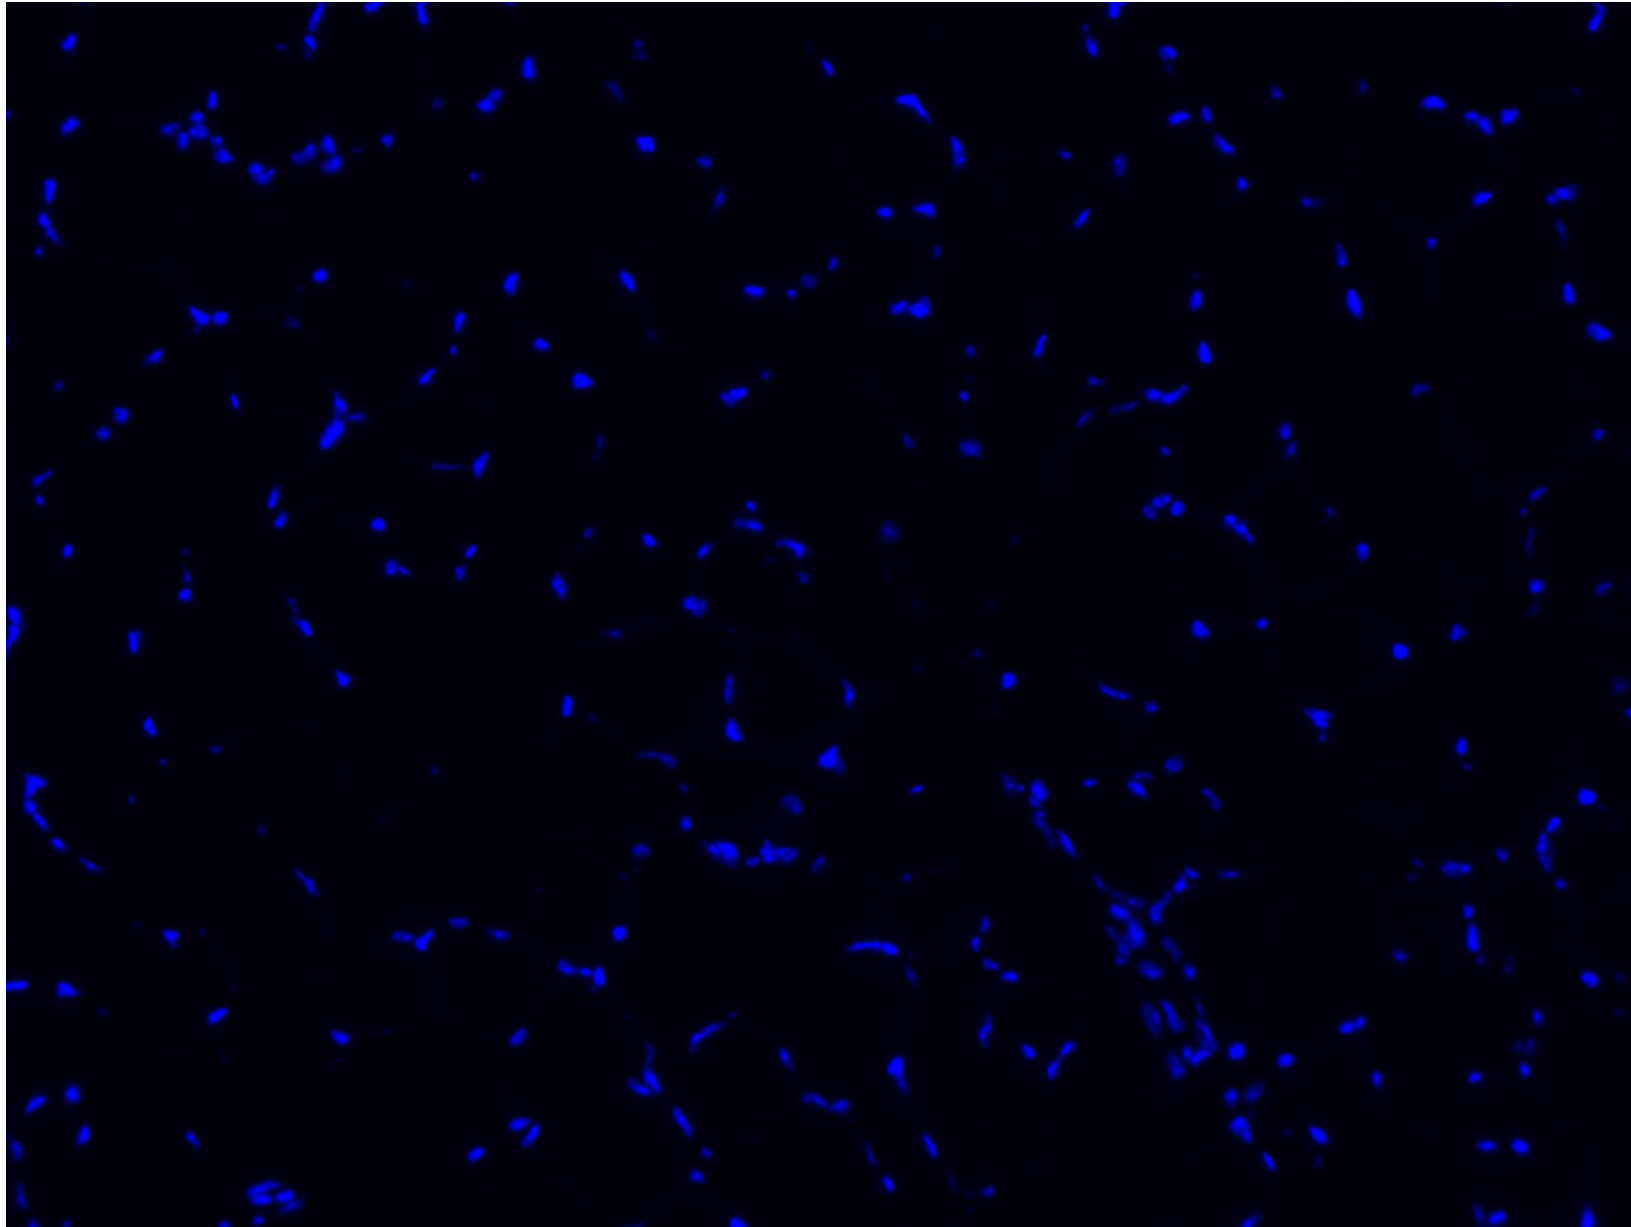

Figure S5C – Bottom row

CTx d0 – CD163

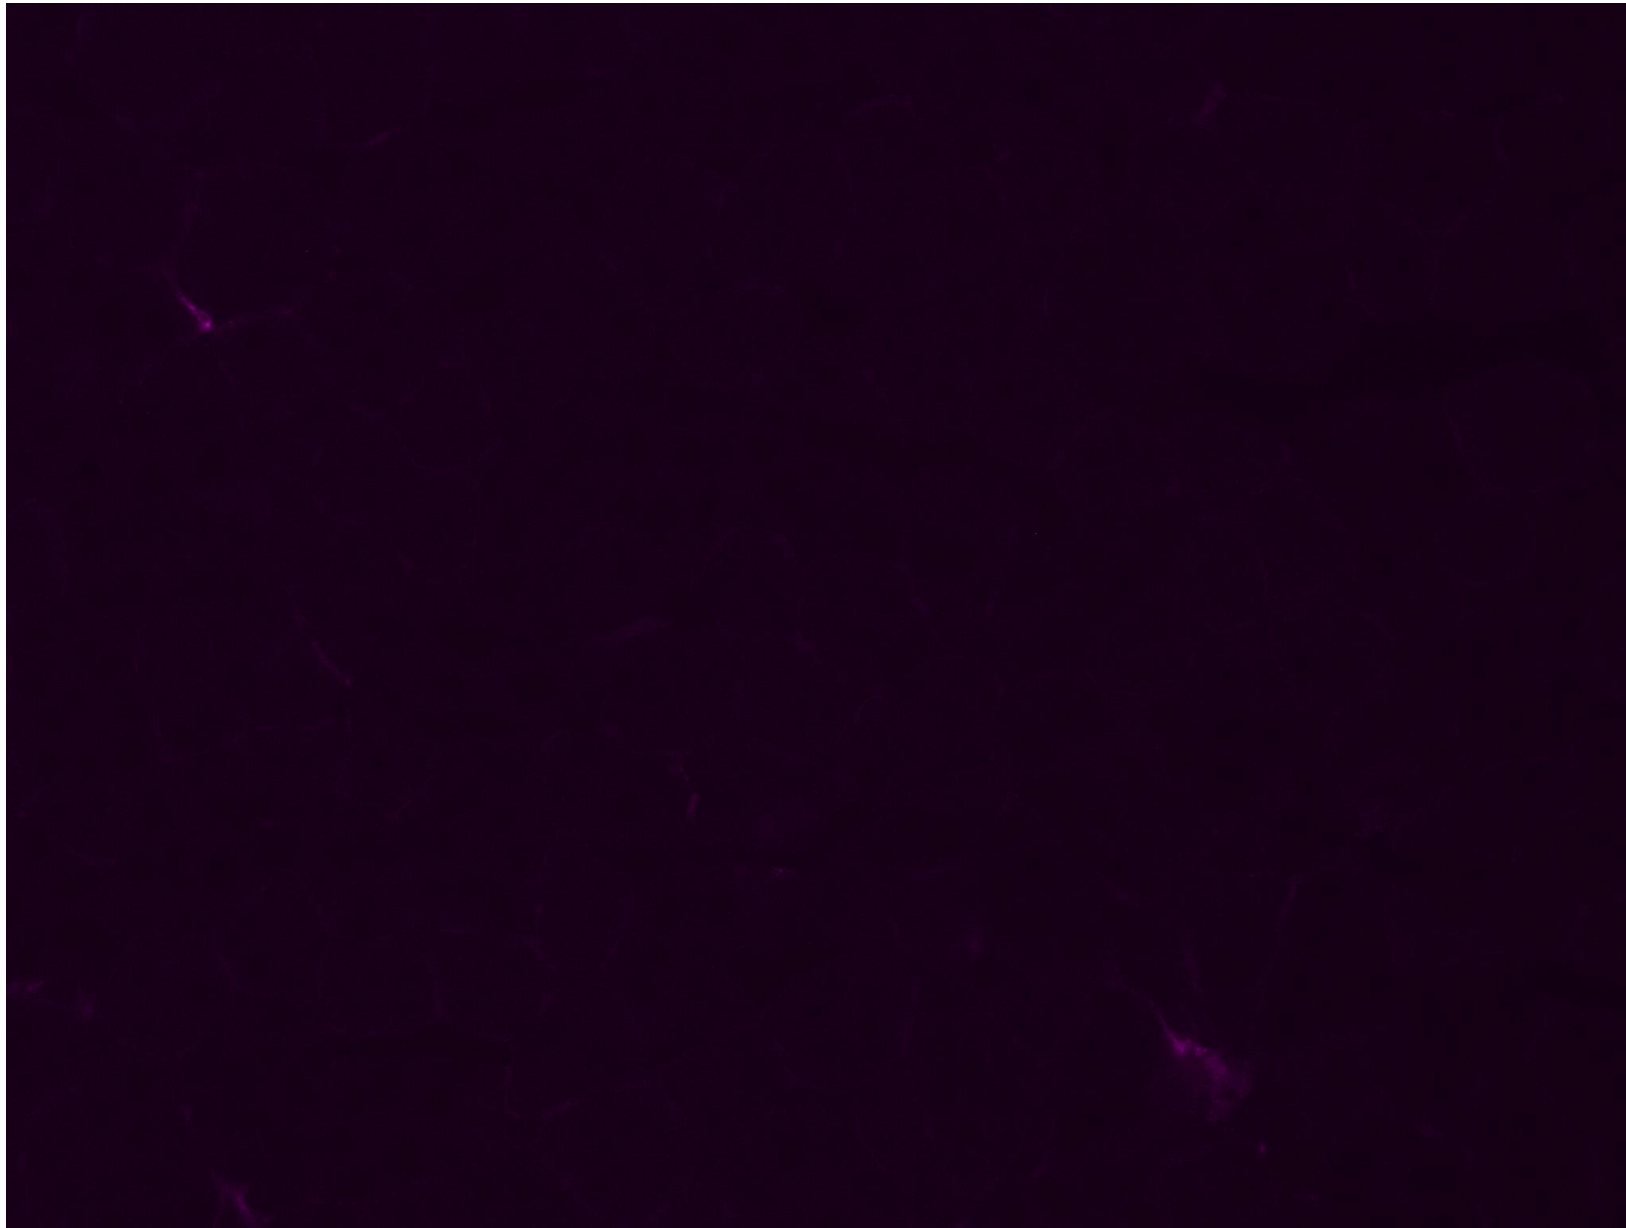

Figure S5C – Bottom row

CTx d0 – TUNEL

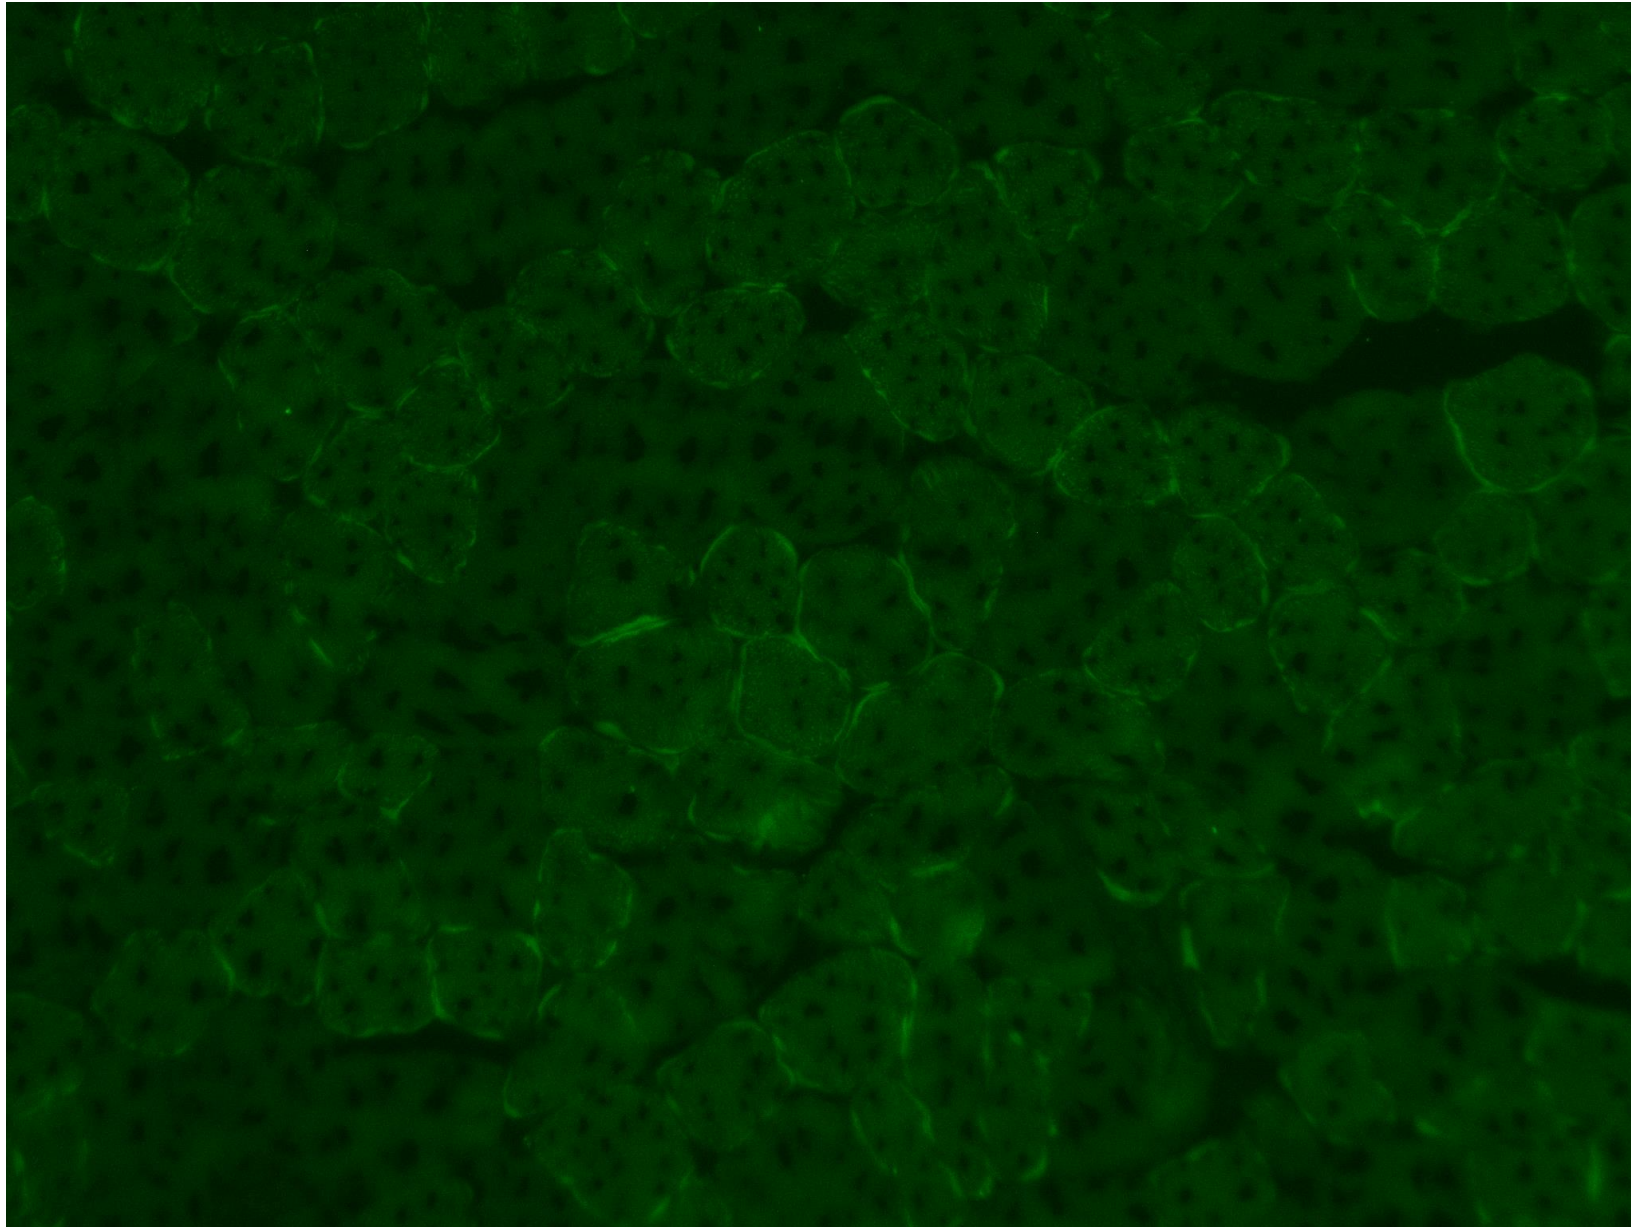

Figure S5C – Bottom row

CTx d3 – DAPI

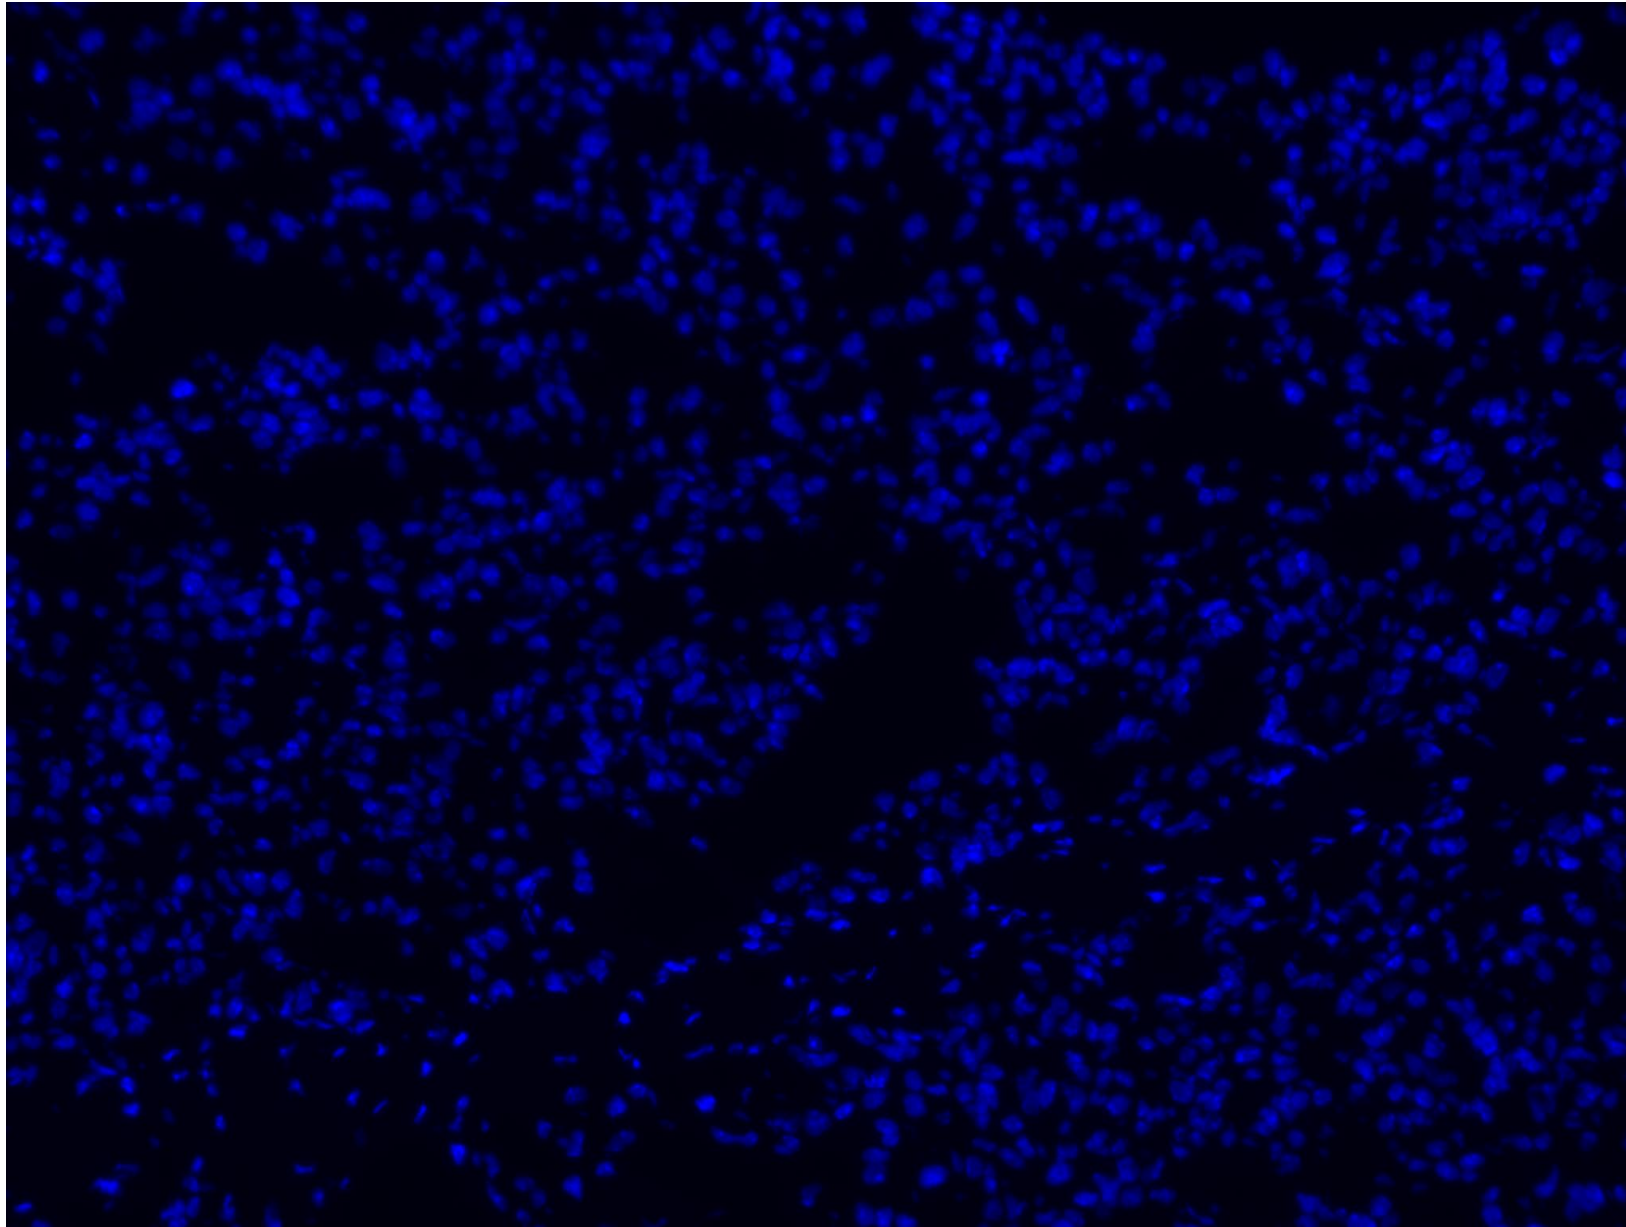

Figure S5C – Bottom row

CTx d3 – CD163

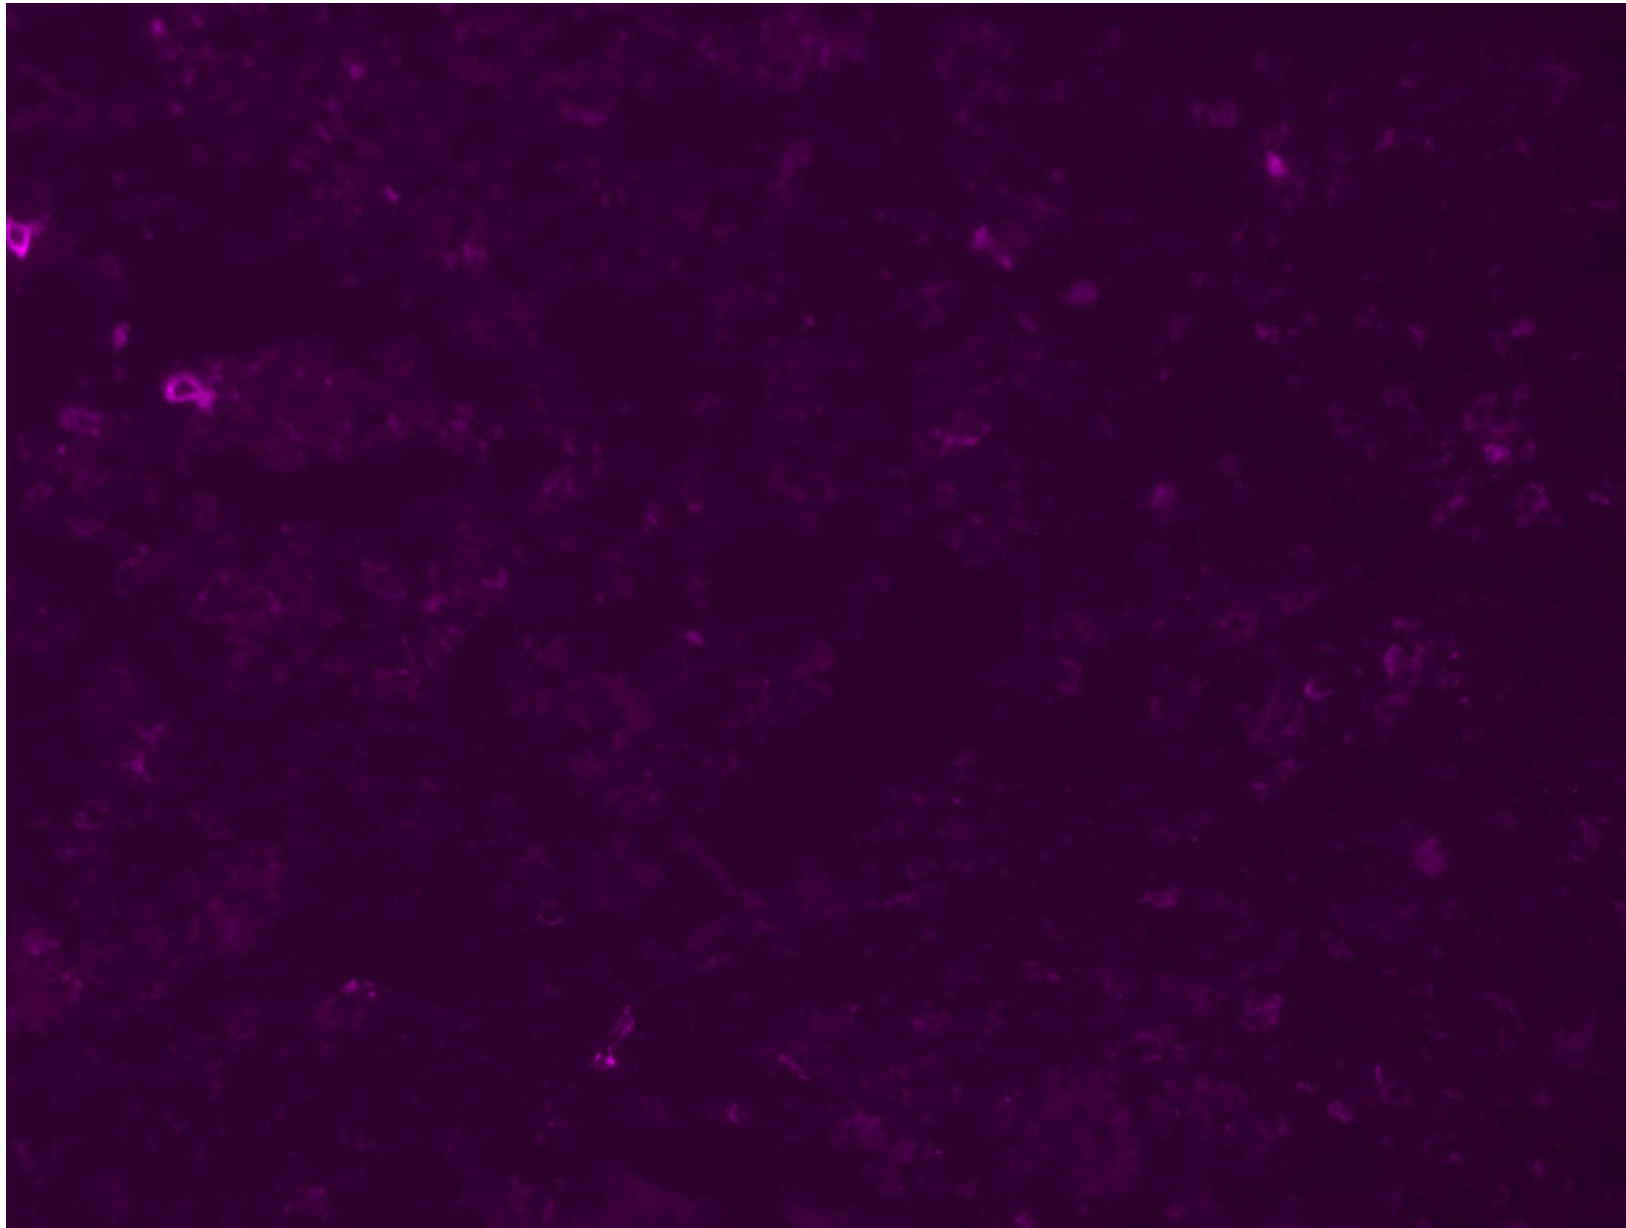

Figure S5C – Bottom row

CTx d3 – TUNEL

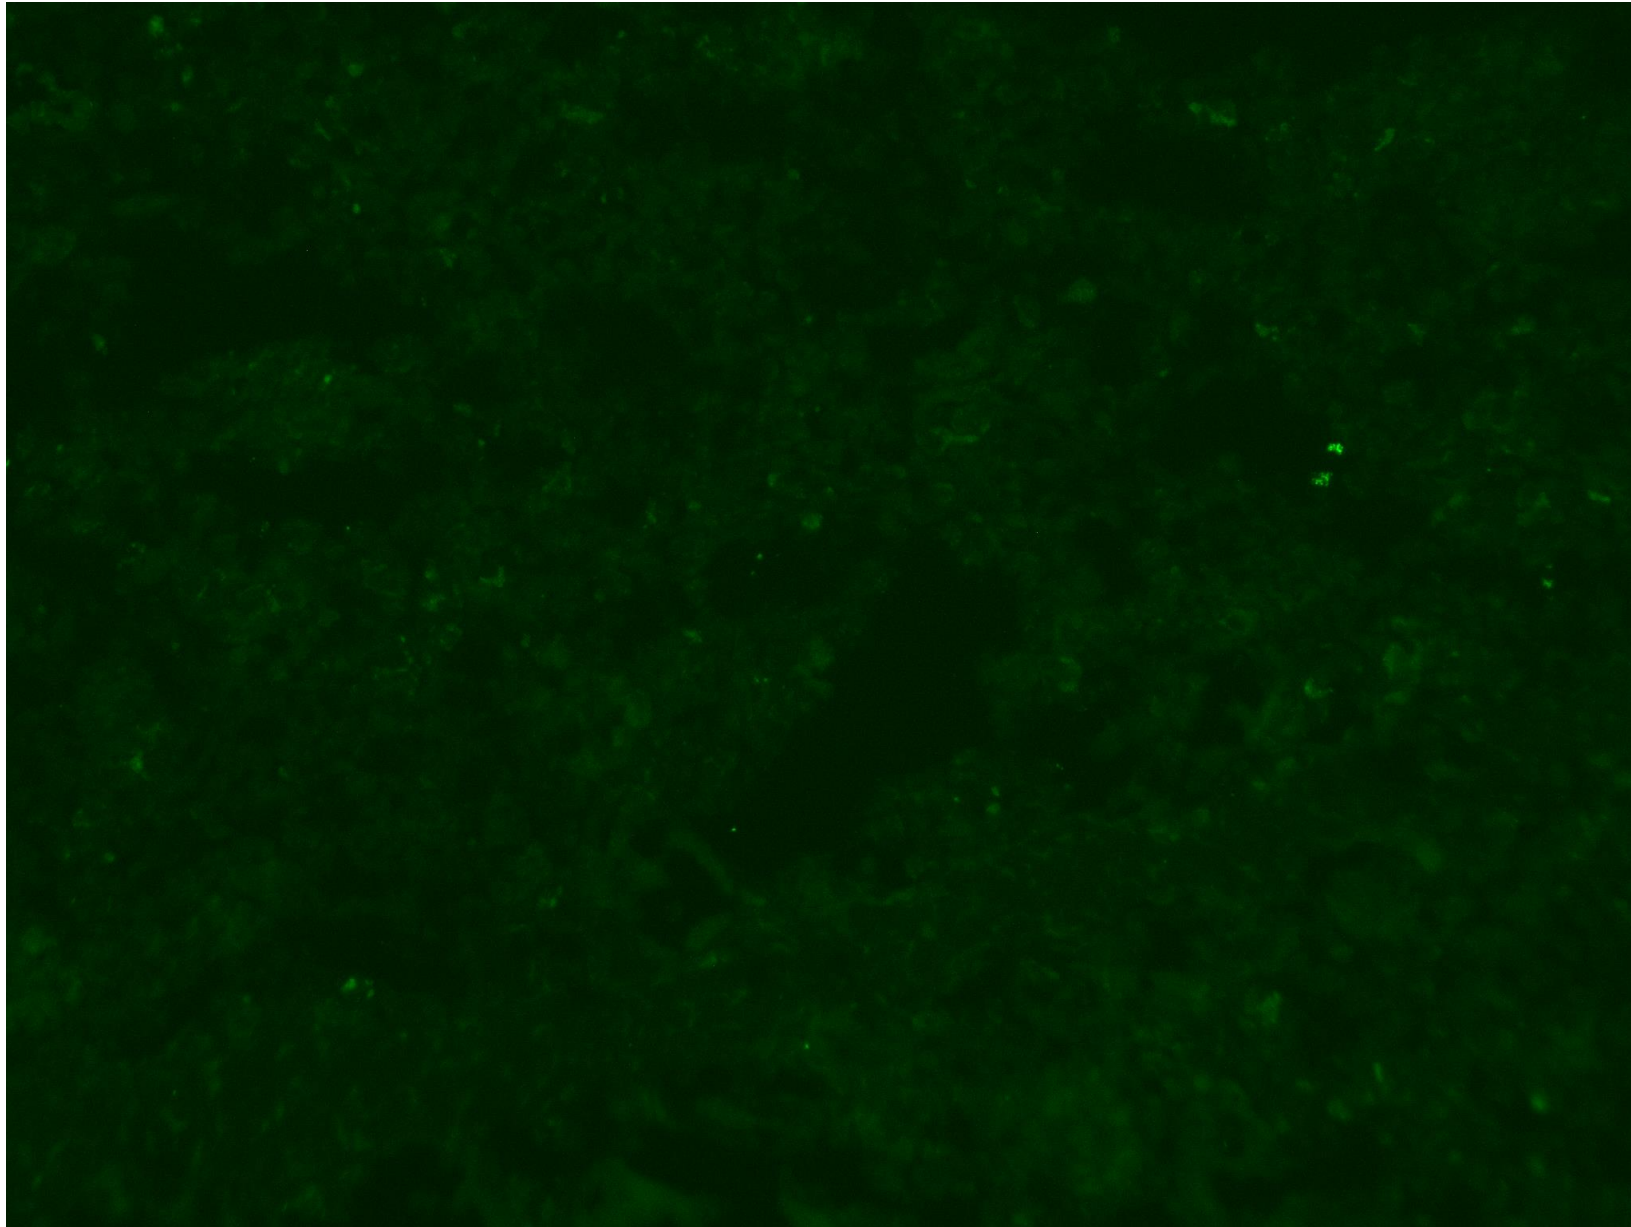

Figure S5C – Bottom row

CTx d4 – DAPI

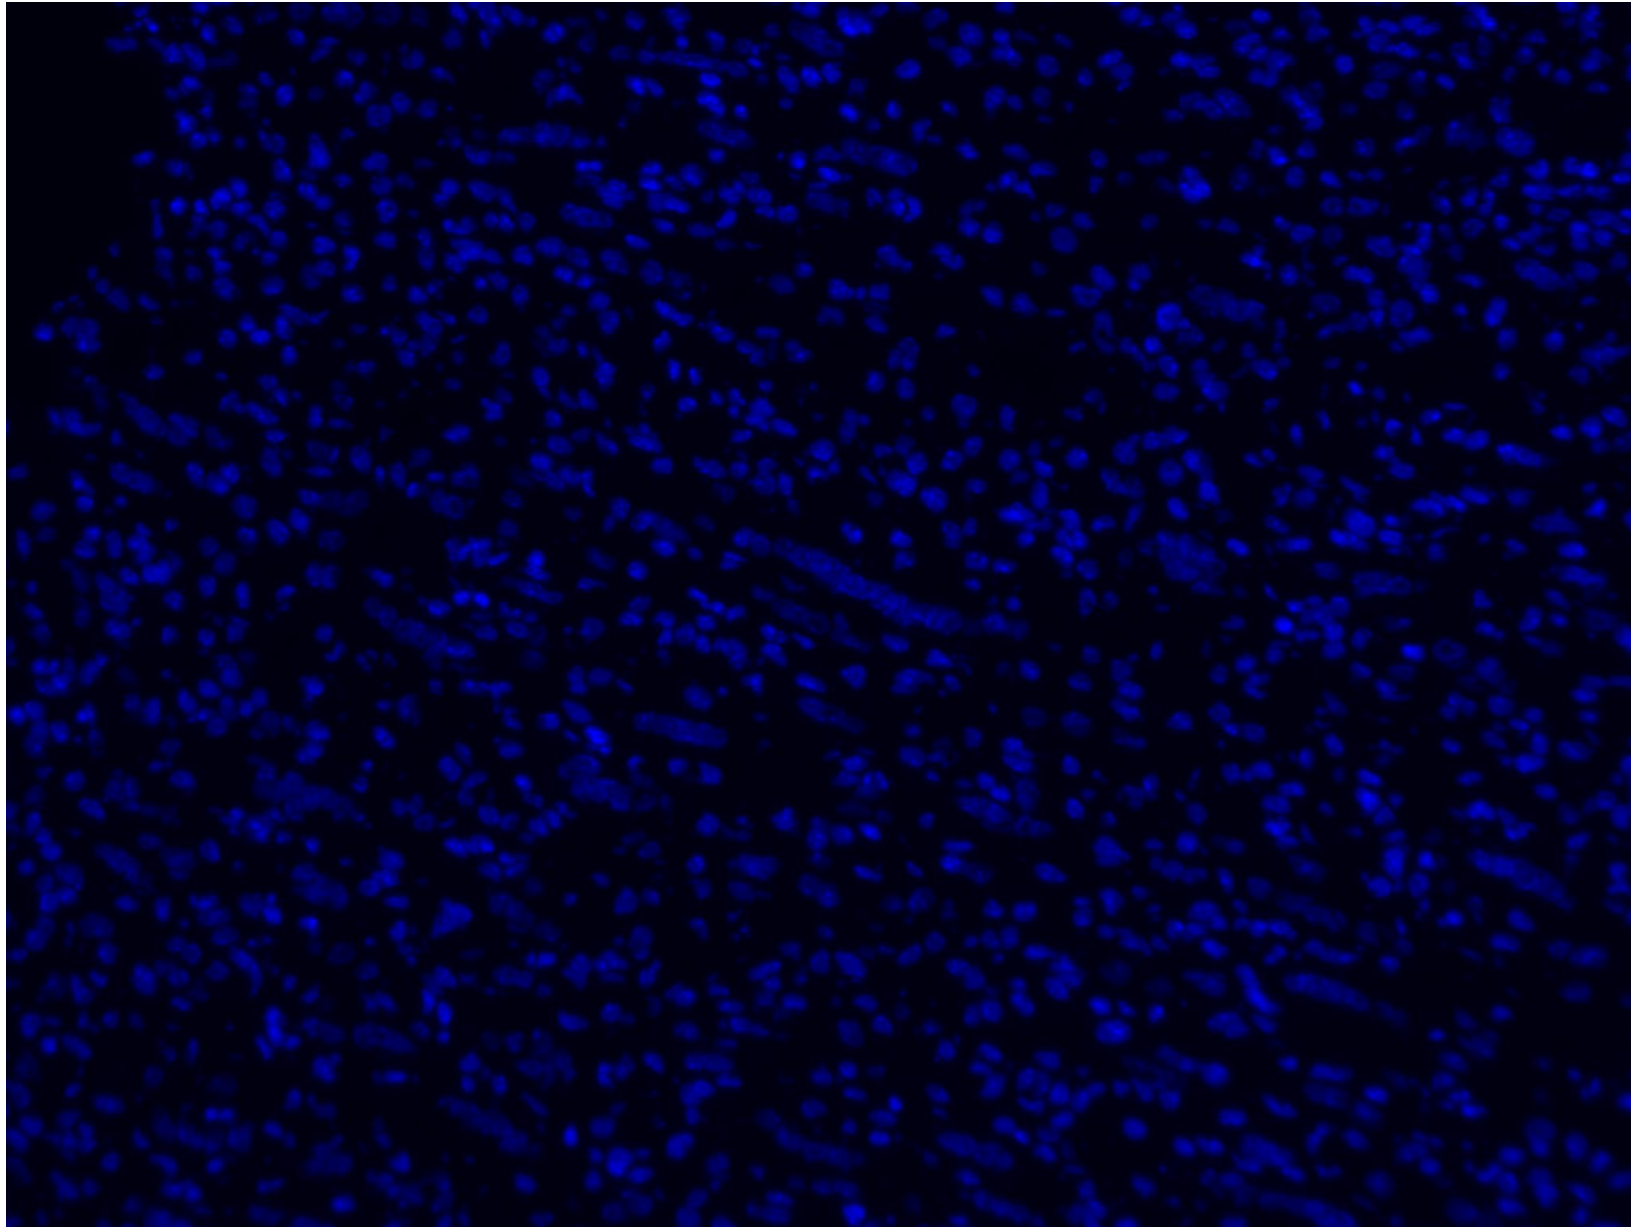

Figure S5C – Bottom row

CTx d4 – CD163

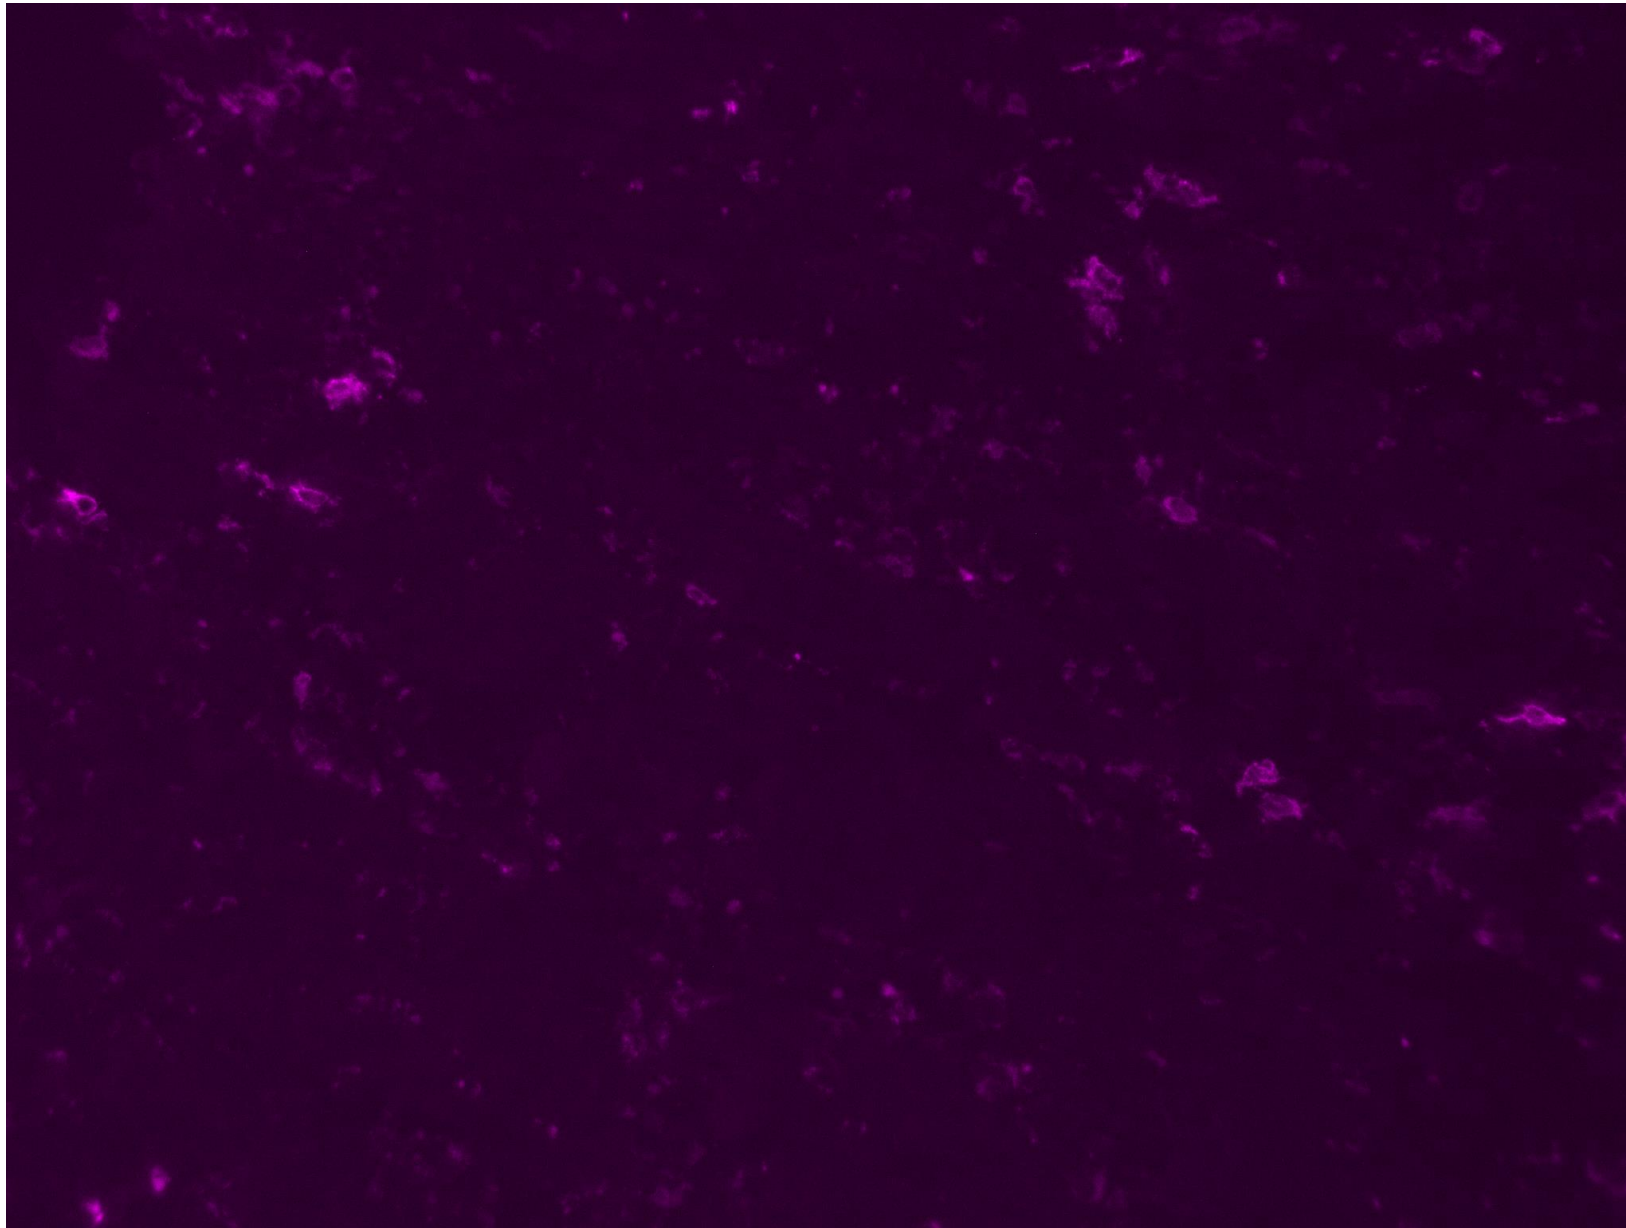

Figure S5C – Bottom row

CTx d4 – TUNEL

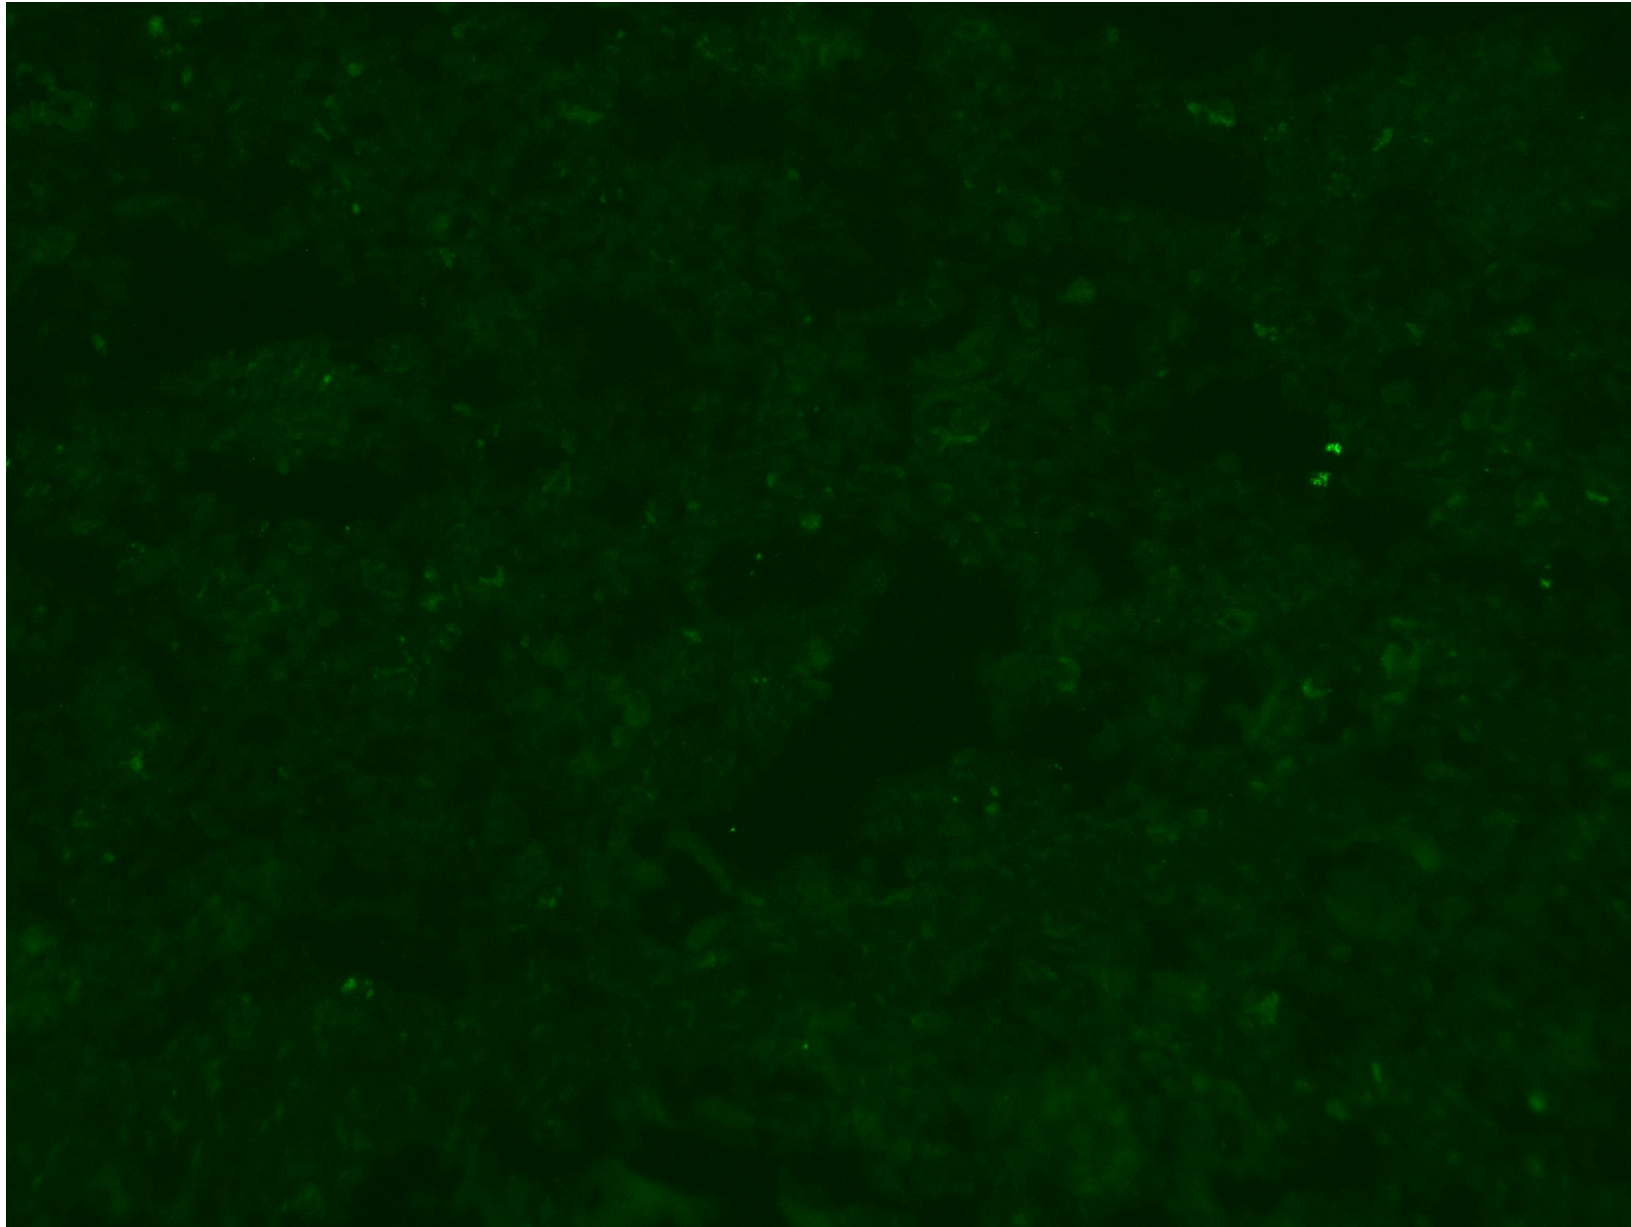

Figure S5C – Bottom row

CTx d5 – DAPI

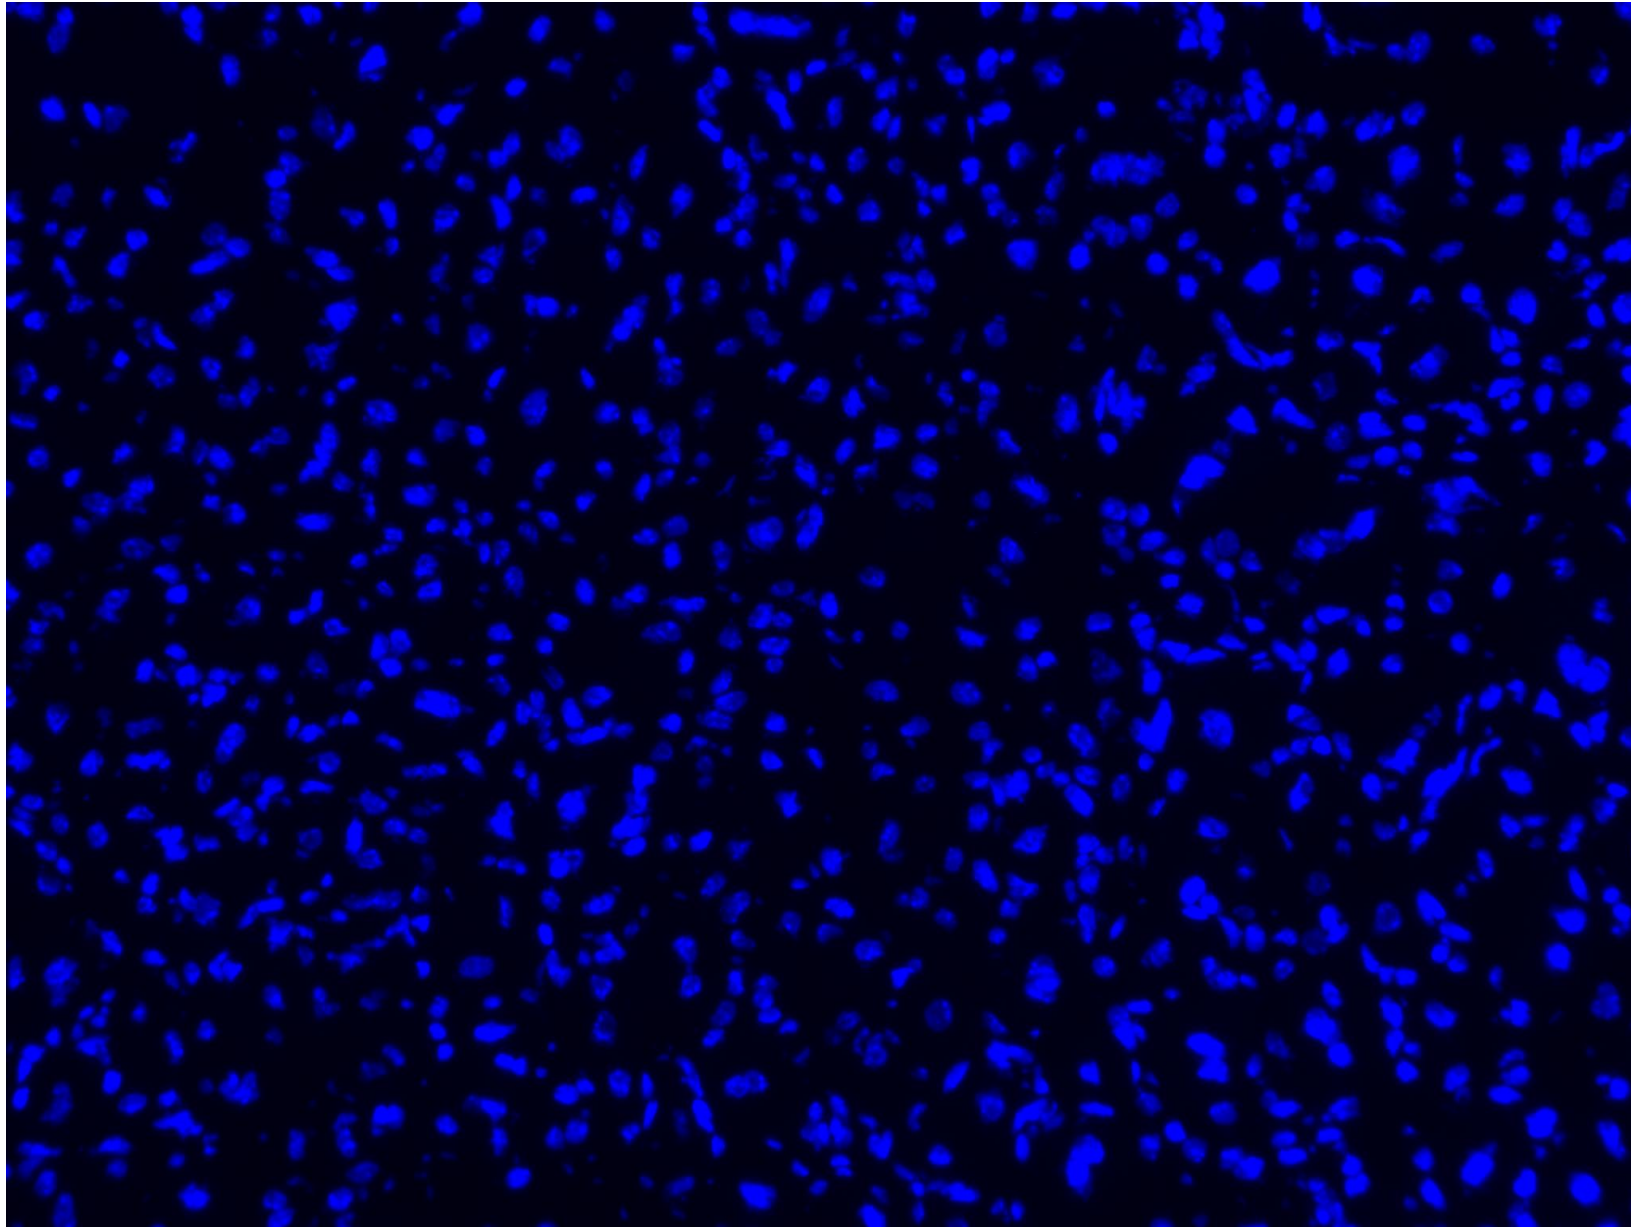

Figure S5C – Bottom row

CTx d5 – CD163

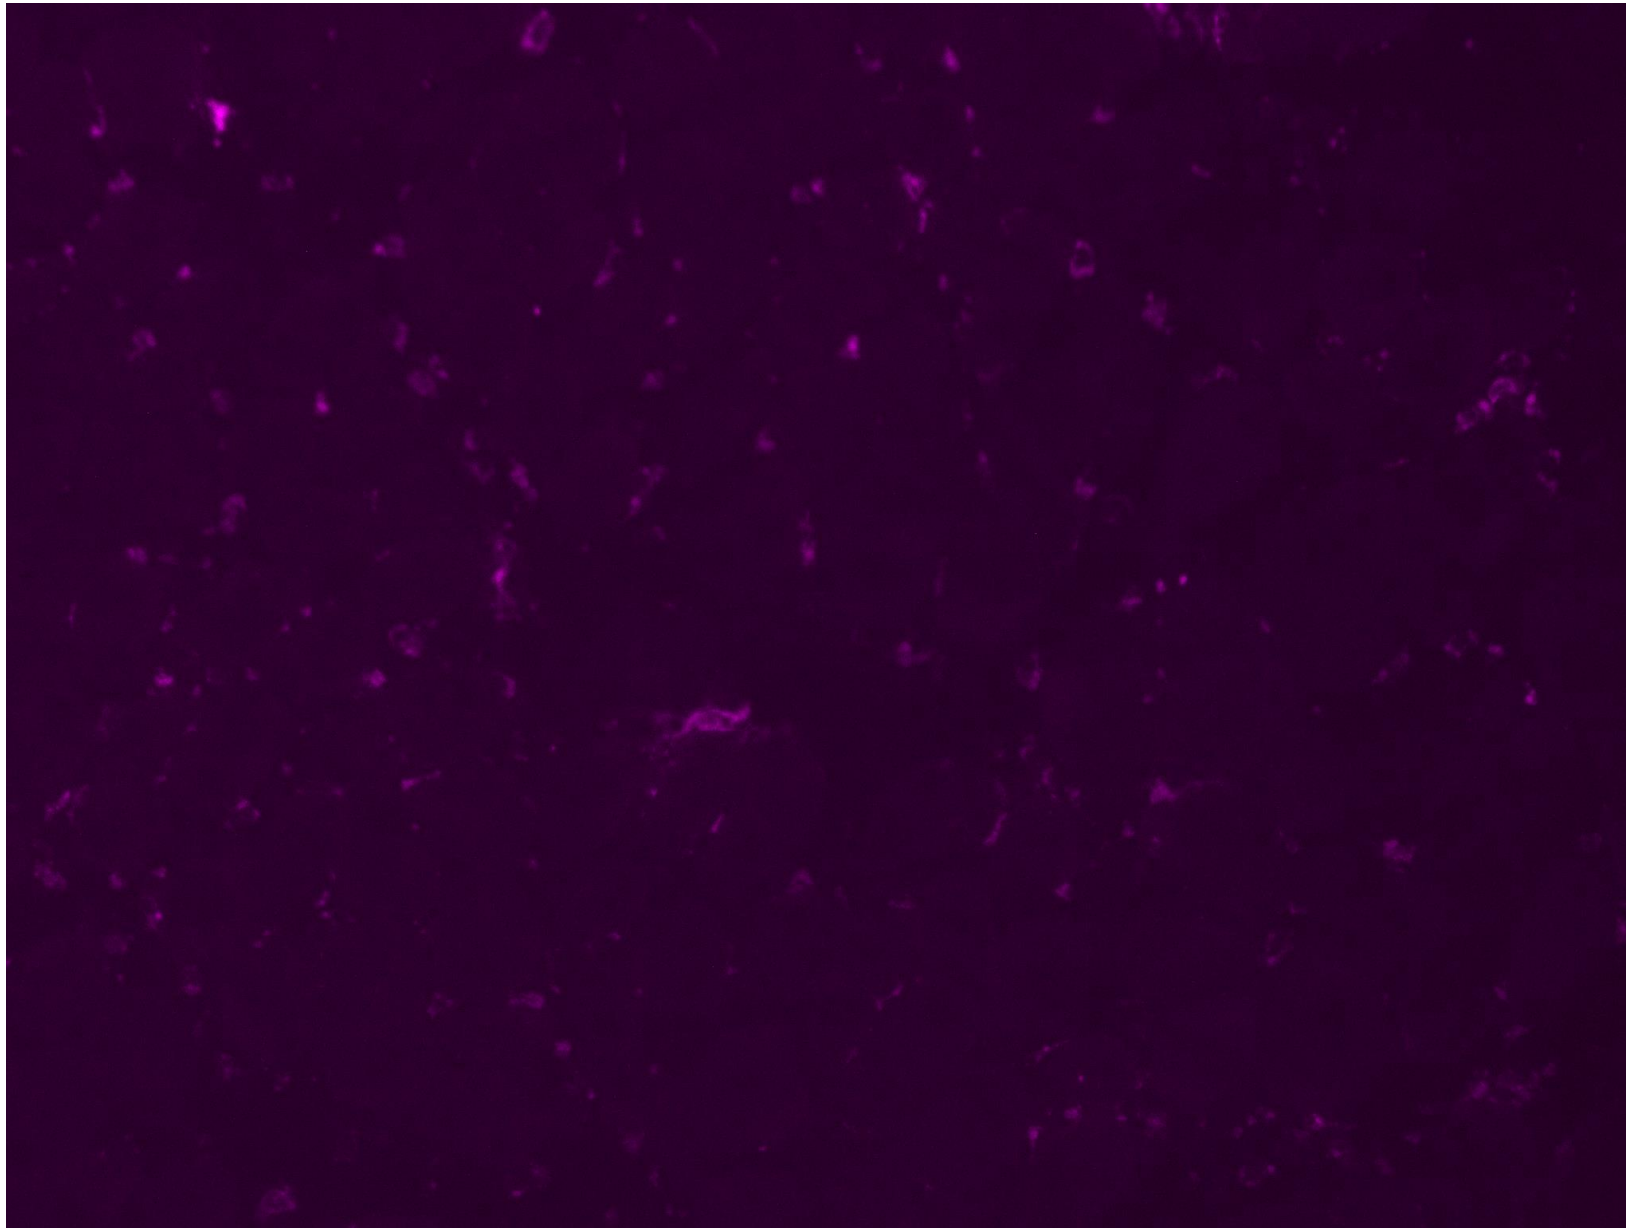

Figure S5C – Bottom row  
CTx d5 – TUNEL

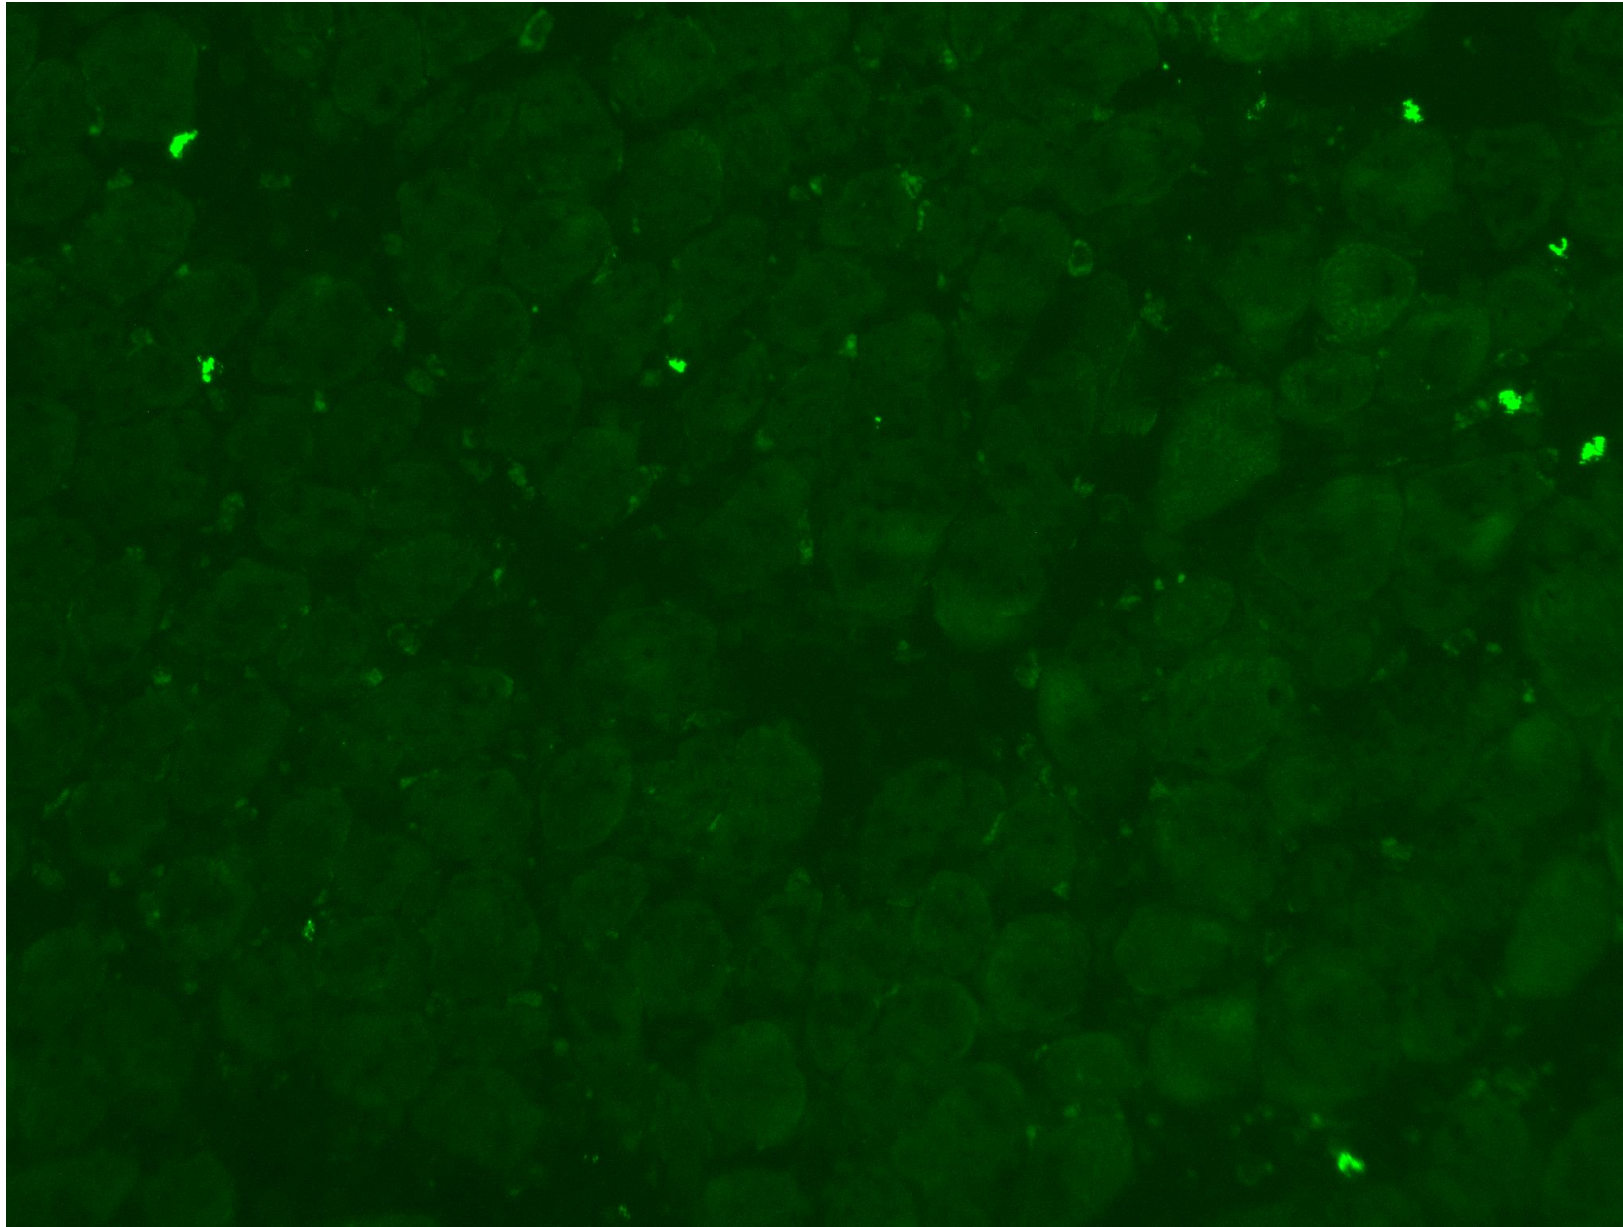

Supplement: Supplementary file 2 [file a707c45f6b33c0f23781c465.pdf]
